# Supplementary material for: Is type-D personality trait(s) or state? An examination of type-D temporal stability in older Israeli adults in the community
Source: PubMed Central journal article supplement (PMC4756746; doi:10.7717/peerj.1690), 2016-02-09
Supplement: peerj-04-1690-s002.pdf [file peerj-04-1690-s002.pdf]

| NO    | Gender_P3 | Fam_stat_P3 | Birth_year_P3 | YEAR_P3 | Education_P3 | Tas_1_P3_a |
|-------|-----------|-------------|---------------|---------|--------------|------------|
| 1,045 | 1         | 2           | 1,949         | 1       | 18           | 0.00       |
| 1,076 | 2         | 2           | 1,947         | 1       | 14           | 3.00       |
| 1,080 | 2         | 2           | 1,949         | 1       | 21           | 0.00       |
| 1,118 | 1         | 2           | 1,937         | 3       | 12           | 0.00       |
| 1,133 | 1         | 2           | 1,949         | 1       | 18           | #NULL!     |
| 1,148 | 1         | 2           | 1,962         | 2       | 15           | 0.00       |
| 1,149 | 2         | 2           | 1,963         | 1       | 15           | 0.00       |
| 1,151 | 1         | 2           | 1,934         | 1       | 14           | 0.00       |
| 1,153 | 2         | 2           | 1,953         | 1       | 16           | 0.00       |
| 1,163 | 2         | 5           | 1,938         | 3       | 12           | 0.00       |
| 1,164 | 2         | 2           | 1,944         | 1       | 12           | 0.00       |
| 1,171 | 2         | 2           | 1,943         | 1       | 12           | 1.00       |
| 1,178 | 2         | 2           | 1,960         | 1       | 20           | 1.00       |
| 1,184 | 1         | 2           | 1,944         | 3       | 16           | 0.00       |
| 1,198 | 1         | 3           | 1,930         | 1       | 15           | 1.00       |
| 1,200 | 2         | 2           | 1,960         | 1       | 18           | #NULL!     |
| 1,201 | 2         | 3           | 1,942         | 2       | 20           | 1.00       |
| 1,210 | 2         | 2           | 1,940         | 1       | 12           | 0.00       |
| 1,211 | 1         | 2           | 1,925         | 1       | 13           | 1.00       |
| 1,219 | 2         | 3           | 1,940         | 1       | 12           | 1.00       |
| 1,222 | 1         | 2           | 1,961         | 1       | 16           | 0.00       |
| 1,223 | 2         | 2           | 1,944         | 1       | 18           | 1.00       |
| 1,225 | 1         | 2           | 1,953         | 1       | 15           | 0.00       |
| 1,226 | 1         | 2           | 1,966         | 1       | 15           | 0.00       |
| 1,239 | 2         | 2           | 1,948         | 1       | 20           | 1.00       |
| 1,241 | 2         | 2           | 1,947         | 1       | 16           | 1.00       |
| 1,242 | 2         | 2           | 1,950         | 1       | 16           | 0.00       |
| 1,243 | 1         | 2           | 1,961         | 1       | 16           | 1.00       |
| 1,244 | 1         | 2           | 1,944         | 2       | 16           | 1.00       |
| 1,249 | 2         | 2           | 1,951         | 1       | 17           | 0.00       |
| 1,251 | 2         | 2           | 1,944         | 1       | 12           | 1.00       |
| 1,253 | 1         | 5           | 1,938         | 1       | 18           | 0.00       |
| 1,255 | 2         | 1           | 1,957         | 1       | 15           | 1.00       |
| 1,257 | 2         | 3           | 1,949         | 1       | 15           | 3.00       |
| 1,259 | 2         | 5           | 1,928         | 3       | 17           | #NULL!     |
| 1,690 | 2         | 2           | 1,951         | 3       | 22           | #NULL!     |
| 1,990 | 2         | 2           | 1,964         | 3       | 15           | #NULL!     |
| 1,136 | 1         | 5           | 1,922         | 3       | 6            | #NULL!     |
| 1,261 | 2         | 2           | 1,944         | 2       | 17           | 0.00       |
| 1,268 | 2         | 2           | 1,950         | 1       | 15           | 1.00       |
| 1,271 | 2         | 5           | 1,917         | 1       | 9            | 1.00       |
| 1,278 | 2         | 5           | 1,932         | 1       | 16           | 1.00       |
| 1,279 | 2         | 2           | 1,948         | 1       | 20           | 1.00       |
| 1,285 | 2         | 2           | 1,943         | 1       | 12           | #NULL!     |
| 1,292 | 2         | 2           | 1,963         | 3       | 18           | 1.00       |
| 1,293 | 1         | 2           | 1,966         | 1       | 18           | 0.00       |
| 1,300 | 2         | 2           | 1,948         | 1       | 17           | 0.00       |
| 1,303 | 1         | 1           | 1,953         | 1       | 15           | #NULL!     |
| 1,306 | 1         | 2           | 1,954         | 1       | 15           | 0.00       |
| 1,309 | 2         | 2           | 1,952         | 1       | 13           | 0.00       |
| 1,310 | 2         | 2           | 1,944         | 1       | 18           | 1.00       |
| 1,311 | 2         | 2           | 1,946         | 1       | 15           | #NULL!     |
| 1,313 | 2         | 2           | 1,946         | 2       | 12           | 1.00       |
| 1,315 | 2         | 5           | 1,940         | 1       | 14           | 1.00       |
| 1,323 | 2         | 1           | 1,950         | 1       | 12           | #NULL!     |

|       |   |        |       |   |    |        |
|-------|---|--------|-------|---|----|--------|
| 1,325 | 2 | 2      | 1,943 | 1 | 12 | 0.00   |
| 1,329 | 2 | 2      | 1,949 | 1 | 17 | 0.00   |
| 1,330 | 1 | 2      | 1,963 | 1 | 18 | 0.00   |
| 1,331 | 2 | 2      | 1,944 | 1 | 12 | 0.00   |
| 1,336 | 2 | 5      | 1,944 | 1 | 18 | 1.00   |
| 1,337 | 2 | 3      | 1,945 | 1 | 15 | #NULL! |
| 1,346 | 1 | 2      | 1,943 | 1 | 15 | 0.00   |
| 1,347 | 1 | 4      | 1,947 | 1 | 15 | 0.00   |
| 1,352 | 2 | 3      | 1,966 | 2 | 17 | 3.00   |
| 1,353 | 1 | 5      | 1,934 | 1 | 15 | 1.00   |
| 1,354 | 1 | 2      | 1,936 | 1 | 11 | 0.00   |
| 1,355 | 2 | 2      | 1,937 | 1 | 12 | 2.00   |
| 1,356 | 2 | 2      | 1,935 | 1 | 17 | 1.00   |
| 1,357 | 1 | 2      | 1,935 | 1 | 13 | 1.00   |
| 1,358 | 2 | 2      | 1,950 | 1 | 14 | 1.00   |
| 1,359 | 2 | 2      | 1,966 | 1 | 16 | 2.00   |
| 1,362 | 1 | 3      | 1,952 | 1 | 14 | 0.00   |
| 1,365 | 2 | 2      | 1,955 | 1 | 15 | 0.00   |
| 1,373 | 1 | 2      | 1,956 | 1 | 16 | 1.00   |
| 1,375 | 2 | 2      | 1,959 | 1 | 15 | 1.00   |
| 1,378 | 1 | 2      | 1,957 | 1 | 10 | 0.00   |
| 1,379 | 1 | 2      | 1,947 | 2 | 15 | 0.00   |
| 1,387 | 2 | 2      | 1,965 | 1 | 15 | #NULL! |
| 1,388 | 1 | 2      | 1,956 | 2 | 16 | 0.00   |
| 1,389 | 2 | 2      | 1,952 | 1 | 20 | 0.00   |
| 1,390 | 1 | 2      | 1,951 | 1 | 14 | 1.00   |
| 1,393 | 1 | 2      | 1,951 | 1 | 17 | 1.00   |
| 1,394 | 2 | 3      | 1,960 | 1 | 13 | 0.00   |
| 1,399 | 1 | 2      | 1,934 | 1 | 15 | 1.00   |
| 1,401 | 2 | 2      | 1,961 | 1 | 16 | 0.00   |
| 1,402 | 1 | 2      | 1,957 | 1 | 12 | 0.00   |
| 1,407 | 1 | 2      | 1,954 | 1 | 15 | 1.00   |
| 1,409 | 2 | 3      | 1,959 | 2 | 16 | 0.00   |
| 1,415 | 2 | 2      | 1,953 | 1 | 16 | 2.00   |
| 1,418 | 1 | 2      | 1,951 | 2 | 23 | 0.00   |
| 1,421 | 2 | 2      | 1,963 | 3 | 15 | 1.00   |
| 1,432 | 1 | 2      | 1,955 | 1 | 16 | 1.00   |
| 1,437 | 2 | 2      | 1,964 | 3 | 21 | 4.00   |
| 1,438 | 1 | 2      | 1,963 | 1 | 21 | #NULL! |
| 1,441 | 1 | 2      | 1,942 | 1 | 15 | 1.00   |
| 1,445 | 1 | 3      | 1,945 | 1 | 14 | 2.00   |
| 1,447 | 1 | 2      | 1,953 | 2 | 15 | 2.00   |
| 1,448 | 2 | 2      | 1,953 | 1 | 21 | 0.00   |
| 1,450 | 2 | 1      | 1,942 | 1 | 18 | 1.00   |
| 1,452 | 2 | 4      | 1,958 | 1 | 14 | 2.00   |
| 1,455 | 1 | 2      | 1,937 | 1 | 16 | 1.00   |
| 1,457 | 2 | 2      | 1,952 | 1 | 18 | 1.00   |
| 1,462 | 2 | 4      | 1,960 | 1 | 15 | 1.00   |
| 1,463 | 2 | 2      | 1,965 | 3 | 14 | 0.00   |
| 1,464 | 1 | 2      | 1,962 | 2 | 14 | 1.00   |
| 1,468 | 2 | 2      | 1,939 | 1 | 15 | #NULL! |
| 1,472 | 2 | 3      | 1,962 | 1 | 12 | 0.00   |
| 1,476 | 1 | 2      | 1,950 | 1 | 13 | 1.00   |
| 1,479 | 2 | 2      | 1,963 | 2 | 15 | 1.00   |
| 1,480 | 2 | #NULL! | 1,951 | 2 | 13 | #NULL! |
| 1,485 | 2 | 3      | 1,948 | 1 | 18 | 1.00   |

|       |   |   |       |   |    |        |
|-------|---|---|-------|---|----|--------|
| 1,487 | 2 | 3 | 1,948 | 1 | 14 | 1.00   |
| 1,488 | 1 | 5 | 1,940 | 1 | 16 | 1.00   |
| 1,489 | 1 | 2 | 1,964 | 1 | 18 | 0.00   |
| 1,496 | 1 | 2 | 1,950 | 1 | 23 | #NULL! |
| 1,497 | 2 | 2 | 1,949 | 1 | 15 | 1.00   |
| 1,498 | 2 | 2 | 1,925 | 1 | 15 | 1.00   |
| 1,504 | 1 | 2 | 1,948 | 1 | 14 | 1.00   |
| 1,505 | 2 | 2 | 1,965 | 2 | 14 | 0.00   |
| 1,506 | 1 | 2 | 1,961 | 2 | 15 | #NULL! |
| 1,511 | 2 | 2 | 1,965 | 1 | 12 | 1.00   |
| 1,512 | 1 | 2 | 1,954 | 1 | 19 | 0.00   |
| 1,513 | 2 | 2 | 1,951 | 1 | 18 | 0.00   |
| 1,514 | 1 | 2 | 1,943 | 1 | 17 | 1.00   |
| 1,523 | 1 | 2 | 1,958 | 2 | 17 | 0.00   |
| 1,528 | 1 | 2 | 1,955 | 1 | 16 | 0.00   |
| 1,532 | 1 | 3 | 1,936 | 1 | 15 | #NULL! |
| 1,534 | 2 | 3 | 1,950 | 2 | 16 | 1.00   |
| 1,536 | 2 | 2 | 1,954 | 1 | 23 | #NULL! |
| 1,545 | 1 | 2 | 1,939 | 1 | 18 | 0.00   |
| 1,546 | 2 | 2 | 1,946 | 2 | 12 | 1.00   |
| 1,549 | 2 | 3 | 1,953 | 1 | 20 | #NULL! |
| 1,550 | 1 | 2 | 1,963 | 1 | 12 | 0.00   |
| 1,556 | 2 | 2 | 1,953 | 1 | 16 | #NULL! |
| 1,564 | 1 | 2 | 1,966 | 1 | 16 | 0.00   |
| 1,580 | 2 | 5 | 1,948 | 1 | 12 | 0.00   |
| 1,582 | 1 | 2 | 1,966 | 2 | 15 | 3.00   |
| 1,583 | 1 | 2 | 1,953 | 2 | 15 | 0.00   |
| 1,584 | 2 | 5 | 1,955 | 1 | 17 | 1.00   |
| 1,587 | 2 | 3 | 1,945 | 1 | 18 | #NULL! |
| 1,598 | 2 | 3 | 1,957 | 1 | 14 | #NULL! |
| 1,599 | 2 | 3 | 1,956 | 1 | 14 | 1.00   |
| 1,606 | 2 | 3 | 1,967 | 1 | 16 | 1.00   |
| 1,607 | 2 | 5 | 1,942 | 1 | 16 | 3.00   |
| 1,614 | 2 | 2 | 1,946 | 1 | 12 | 1.00   |
| 1,615 | 1 | 2 | 1,939 | 1 | 12 | 1.00   |
| 1,616 | 2 | 2 | 1,939 | 1 | 14 | 0.00   |
| 1,620 | 2 | 2 | 1,934 | 1 | 15 | #NULL! |
| 1,623 | 2 | 2 | 1,957 | 1 | 13 | 0.00   |
| 1,626 | 1 | 2 | 1,947 | 1 | 19 | 2.00   |
| 1,627 | 1 | 2 | 1,954 | 1 | 20 | #NULL! |
| 1,632 | 1 | 2 | 1,941 | 1 | 12 | 2.00   |
| 1,634 | 2 | 2 | 1,960 | 1 | 16 | 2.00   |
| 1,636 | 2 | 2 | 1,965 | 1 | 14 | 1.00   |
| 1,637 | 1 | 2 | 1,957 | 1 | 18 | 1.00   |
| 1,638 | 2 | 3 | 1,945 | 1 | 17 | 1.00   |
| 1,641 | 2 | 2 | 1,945 | 1 | 17 | 0.00   |
| 1,645 | 2 | 2 | 1,965 | 3 | 12 | 3.00   |
| 1,650 | 1 | 2 | 1,936 | 2 | 12 | 1.00   |
| 1,655 | 2 | 2 | 1,957 | 1 | 16 | 1.00   |
| 1,671 | 2 | 2 | 1,954 | 2 | 15 | 1.00   |
| 1,674 | 1 | 3 | 1,938 | 1 | 15 | 0.00   |
| 1,677 | 1 | 2 | 1,943 | 1 | 20 | #NULL! |
| 1,685 | 2 | 2 | 1,959 | 1 | 19 | 0.00   |
| 1,687 | 1 | 2 | 1,955 | 1 | 16 | 1.00   |
| 1,689 | 1 | 2 | 1,958 | 1 | 17 | 1.00   |
| 1,696 | 2 | 3 | 1,959 | 1 | 18 | 1.00   |

|       |   |   |       |   |    |        |
|-------|---|---|-------|---|----|--------|
| 1,698 | 2 | 3 | 1,964 | 3 | 19 | 0.00   |
| 1,702 | 2 | 2 | 1,962 | 1 | 13 | 0.00   |
| 1,705 | 1 | 2 | 1,957 | 1 | 12 | 0.00   |
| 1,706 | 2 | 3 | 1,943 | 1 | 19 | 1.00   |
| 1,710 | 1 | 3 | 1,957 | 1 | 15 | #NULL! |
| 1,712 | 2 | 2 | 1,942 | 1 | 12 | 0.00   |
| 1,714 | 1 | 3 | 1,956 | 1 | 16 | 1.00   |
| 1,715 | 2 | 2 | 1,964 | 2 | 15 | 0.00   |
| 1,719 | 2 | 1 | 1,943 | 1 | 20 | 0.00   |
| 1,721 | 2 | 3 | 1,946 | 1 | 15 | 3.00   |
| 1,723 | 2 | 5 | 1,935 | 1 | 10 | 1.00   |
| 1,730 | 1 | 3 | 1,964 | 1 | 14 | 0.00   |
| 1,738 | 2 | 2 | 1,953 | 1 | 15 | 1.00   |
| 1,741 | 2 | 2 | 1,961 | 1 | 16 | 3.00   |
| 1,744 | 2 | 3 | 1,951 | 1 | 15 | 2.00   |
| 1,745 | 1 | 3 | 1,945 | 1 | 16 | #NULL! |
| 1,747 | 2 | 2 | 1,943 | 2 | 12 | 1.00   |
| 1,748 | 1 | 2 | 1,943 | 1 | 19 | 0.00   |
| 1,749 | 1 | 3 | 1,944 | 1 | 14 | 3.00   |
| 1,754 | 2 | 5 | 1,935 | 1 | 18 | #NULL! |
| 1,755 | 2 | 1 | 1,937 | 1 | 15 | 0.00   |
| 1,756 | 2 | 4 | 1,945 | 1 | 20 | #NULL! |
| 1,759 | 1 | 2 | 1,963 | 1 | 22 | 0.00   |
| 1,762 | 1 | 3 | 1,960 | 2 | 15 | 1.00   |
| 1,772 | 1 | 2 | 1,943 | 1 | 16 | 0.00   |
| 1,775 | 2 | 2 | 1,944 | 1 | 25 | 1.00   |
| 1,777 | 2 | 2 | 1,958 | 1 | 22 | 2.00   |
| 1,778 | 2 | 2 | 1,952 | 1 | 14 | 0.00   |
| 1,779 | 2 | 2 | 1,943 | 1 | 13 | 1.00   |
| 1,790 | 1 | 2 | 1,959 | 1 | 15 | 1.00   |
| 1,791 | 1 | 2 | 1,966 | 2 | 16 | 1.00   |
| 1,792 | 1 | 2 | 1,932 | 1 | 19 | #NULL! |
| 1,794 | 1 | 2 | 1,933 | 1 | 20 | 1.00   |
| 1,796 | 2 | 2 | 1,951 | 1 | 15 | #NULL! |
| 1,803 | 1 | 3 | 1,951 | 1 | 13 | 1.00   |
| 1,805 | 2 | 5 | 1,937 | 1 | 14 | 1.00   |
| 1,813 | 1 | 2 | 1,946 | 1 | 15 | #NULL! |
| 1,816 | 1 | 2 | 1,967 | 1 | 15 | 3.00   |
| 1,824 | 1 | 2 | 1,955 | 2 | 17 | 2.00   |
| 1,826 | 2 | 3 | 1,942 | 1 | 18 | 1.00   |
| 1,831 | 2 | 2 | 1,934 | 2 | 15 | #NULL! |
| 1,833 | 2 | 2 | 1,953 | 1 | 16 | 1.00   |
| 1,835 | 2 | 5 | 1,944 | 1 | 12 | 1.00   |
| 1,837 | 2 | 2 | 1,935 | 3 | 22 | 0.00   |
| 1,839 | 2 | 2 | 1,953 | 1 | 15 | 1.00   |
| 1,841 | 2 | 2 | 1,957 | 1 | 14 | #NULL! |
| 1,842 | 2 | 3 | 1,952 | 2 | 21 | 0.00   |
| 1,848 | 1 | 5 | 1,937 | 1 | 12 | 1.00   |
| 1,849 | 1 | 2 | 1,967 | 1 | 15 | 1.00   |
| 1,857 | 2 | 3 | 1,958 | 1 | 19 | #NULL! |
| 1,858 | 2 | 3 | 1,953 | 2 | 15 | 1.00   |
| 1,860 | 1 | 4 | 1,949 | 1 | 18 | 1.00   |
| 1,863 | 1 | 2 | 1,939 | 1 | 20 | 1.00   |
| 1,865 | 1 | 3 | 1,961 | 1 | 13 | 0.00   |
| 1,870 | 2 | 3 | 1,955 | 1 | 15 | #NULL! |
| 1,873 | 2 | 2 | 1,962 | 2 | 20 | 1.00   |

|       |   |   |       |   |    |        |
|-------|---|---|-------|---|----|--------|
| 1,877 | 2 | 2 | 1,942 | 1 | 12 | 1.00   |
| 1,886 | 1 | 2 | 1,955 | 1 | 16 | 2.00   |
| 1,890 | 1 | 2 | 1,962 | 1 | 14 | 1.00   |
| 1,891 | 1 | 2 | 1,941 | 1 | 13 | 1.00   |
| 1,892 | 1 | 3 | 1,961 | 1 | 14 | 2.00   |
| 1,895 | 2 | 3 | 1,944 | 1 | 19 | 1.00   |
| 1,897 | 2 | 2 | 1,946 | 1 | 25 | 0.00   |
| 1,898 | 1 | 2 | 1,935 | 1 | 24 | #NULL! |
| 1,902 | 2 | 2 | 1,956 | 1 | 15 | 1.00   |
| 1,907 | 2 | 3 | 1,957 | 1 | 13 | 3.00   |
| 1,910 | 2 | 2 | 1,956 | 1 | 15 | 2.00   |
| 1,911 | 2 | 2 | 1,936 | 1 | 14 | #NULL! |
| 1,912 | 1 | 3 | 1,953 | 1 | 15 | #NULL! |
| 1,915 | 1 | 3 | 1,958 | 1 | 14 | 1.00   |
| 1,924 | 1 | 2 | 1,965 | 1 | 17 | 1.00   |
| 1,925 | 1 | 2 | 1,948 | 1 | 16 | 1.00   |
| 1,926 | 2 | 2 | 1,956 | 1 | 12 | 1.00   |
| 1,934 | 1 | 2 | 1,958 | 1 | 14 | 1.00   |
| 1,938 | 1 | 2 | 1,927 | 1 | 12 | 999.00 |
| 1,940 | 1 | 2 | 1,960 | 2 | 16 | 0.00   |
| 1,949 | 2 | 3 | 1,953 | 1 | 18 | 0.00   |
| 1,952 | 2 | 3 | 1,957 | 1 | 16 | 1.00   |
| 1,953 | 2 | 2 | 1,949 | 3 | 17 | 0.00   |
| 1,957 | 2 | 3 | 1,956 | 1 | 11 | 3.00   |
| 1,961 | 2 | 2 | 1,953 | 2 | 15 | 2.00   |
| 1,966 | 2 | 2 | 1,946 | 1 | 16 | 2.00   |
| 1,968 | 1 | 2 | 1,959 | 1 | 21 | 2.00   |
| 1,969 | 2 | 2 | 1,962 | 1 | 18 | 0.00   |
| 1,970 | 2 | 2 | 1,949 | 2 | 20 | 0.00   |
| 1,971 | 2 | 2 | 1,940 | 3 | 12 | 1.00   |
| 1,973 | 2 | 2 | 1,964 | 1 | 12 | 2.00   |
| 1,974 | 1 | 3 | 1,942 | 2 | 15 | 2.00   |
| 1,978 | 2 | 2 | 1,946 | 3 | 17 | 0.00   |
| 1,980 | 1 | 3 | 1,939 | 1 | 17 | 1.00   |
| 1,986 | 1 | 2 | 1,950 | 1 | 17 | 0.00   |
| 1,987 | 2 | 2 | 1,949 | 1 | 16 | #NULL! |
| 1,989 | 1 | 2 | 1,936 | 1 | 15 | 1.00   |
| 1,992 | 2 | 2 | 1,946 | 1 | 18 | 0.00   |
| 1,993 | 2 | 3 | 1,942 | 1 | 16 | 1.00   |
| 1,994 | 2 | 2 | 1,947 | 1 | 14 | 1.00   |
| 1,996 | 2 | 2 | 1,938 | 1 | 16 | 0.00   |
| 1,999 | 1 | 2 | 1,954 | 2 | 14 | 2.00   |
| 2,009 | 2 | 3 | 1,935 | 1 | 12 | 1.00   |
| 2,019 | 2 | 5 | 1,944 | 1 | 18 | 1.00   |
| 2,020 | 1 | 2 | 1,956 | 1 | 17 | 1.00   |
| 2,022 | 2 | 5 | 1,926 | 1 | 15 | #NULL! |
| 3,001 | 2 | 5 | 1,932 | 1 | 14 | 2.00   |
| 3,002 | 1 | 2 | 1,946 | 1 | 17 | 0.00   |
| 3,004 | 2 | 2 | 1,958 | 1 | 17 | 1.00   |
| 3,006 | 2 | 2 | 1,959 | 1 | 25 | 1.00   |
| 3,010 | 2 | 5 | 1,951 | 2 | 18 | 1.00   |
| 3,012 | 2 | 5 | 1,940 | 1 | 16 | 1.00   |
| 3,019 | 1 | 2 | 1,936 | 1 | 16 | 1.00   |
| 3,021 | 2 | 3 | 1,951 | 1 | 12 | #NULL! |
| 3,022 | 2 | 2 | 1,952 | 2 | 15 | 3.00   |
| 3,025 | 2 | 2 | 1,947 | 1 | 16 | 1.00   |

|        |   |   |       |   |    |        |
|--------|---|---|-------|---|----|--------|
| 3,027  | 1 | 2 | 1,950 | 2 | 12 | 0.00   |
| 3,030  | 1 | 2 | 1,953 | 1 | 24 | 1.00   |
| 3,037  | 1 | 2 | 1,940 | 1 | 16 | 0.00   |
| 3,038  | 2 | 3 | 1,945 | 1 | 12 | 1.00   |
| 3,049  | 1 | 3 | 1,962 | 2 | 16 | #NULL! |
| 3,051  | 1 | 2 | 1,959 | 1 | 12 | #NULL! |
| 3,056  | 1 | 2 | 1,953 | 1 | 15 | 0.00   |
| 3,063  | 1 | 3 | 1,946 | 1 | 19 | 3.00   |
| 4,044  | 1 | 3 | 1,964 | 1 | 15 | 0.00   |
| 7,000  | 1 | 5 | 1,942 | 1 | 12 | 0.00   |
| 7,001  | 1 | 2 | 1,940 | 1 | 19 | 0.00   |
| 7,002  | 1 | 2 | 1,940 | 1 | 16 | 0.00   |
| 7,003  | 1 | 2 | 1,956 | 1 | 22 | 0.00   |
| 7,004  | 1 | 2 | 1,943 | 1 | 18 | 1.00   |
| 10,011 | 2 | 2 | 1,951 | 1 | 21 | 0.00   |
| 10,027 | 2 | 2 | 1,960 | 1 | 13 | 0.00   |
| 11,000 | 2 | 5 | 1,937 | 3 | 12 | 4.00   |
| 11,001 | 1 | 2 | 1,957 | 3 | 12 | 1.00   |



|        |        |        |        |        |        |        |        |
|--------|--------|--------|--------|--------|--------|--------|--------|
| 3.00   | 0.00   | 2.000  | 3.00   | 2.00   | 0.00   | 2.00   | 1.00   |
| 1.00   | 0.00   | 0.000  | 0.00   | 1.00   | 1.00   | 0.00   | 0.00   |
| 0.00   | 0.00   | 0.000  | 2.00   | 0.00   | 0.00   | 0.00   | 0.00   |
| 0.00   | 0.00   | 0.000  | 0.00   | 0.00   | 0.00   | 0.00   | 0.00   |
| 1.00   | 0.00   | 3.000  | 3.00   | 1.00   | 1.00   | 1.00   | 1.00   |
| #NULL! | #NULL! | #NULL! | #NULL! | #NULL! | #NULL! | #NULL! | #NULL! |
| 0.00   | 0.00   | 4.000  | 4.00   | 0.00   | 0.00   | 3.00   | 0.00   |
| 0.00   | 0.00   | 4.000  | 3.00   | 1.00   | 0.00   | 1.00   | 0.00   |
| 1.00   | 1.00   | 3.000  | 3.00   | 2.00   | 3.00   | 2.00   | 1.00   |
| 1.00   | 2.00   | 1.000  | 1.00   | 1.00   | 2.00   | 2.00   | 2.00   |
| 0.00   | 0.00   | 4.000  | 2.00   | 1.00   | 0.00   | 3.00   | 0.00   |
| 2.00   | 1.00   | 3.000  | 0.00   | 0.00   | 0.00   | 0.00   | 0.00   |
| 0.00   | 0.00   | 1.000  | 4.00   | 0.00   | 0.00   | 2.00   | 0.00   |
| 2.00   | 1.00   | 2.000  | 2.00   | 2.00   | 1.00   | 2.00   | 1.00   |
| 2.00   | 0.00   | 2.000  | 2.00   | 2.00   | 1.00   | 0.00   | 2.00   |
| 1.00   | 0.00   | 3.000  | 3.00   | 1.00   | 1.00   | 4.00   | 1.00   |
| 0.00   | 0.00   | 3.000  | 2.00   | 1.00   | 0.00   | 2.00   | 1.00   |
| 0.00   | 0.00   | 3.000  | 3.00   | 3.00   | 1.00   | 1.00   | 1.00   |
| 1.00   | 1.00   | 3.000  | 2.00   | 1.00   | 1.00   | 2.00   | 1.00   |
| 2.00   | 0.00   | 2.000  | 1.00   | 1.00   | 0.00   | 3.00   | 1.00   |
| 0.00   | 0.00   | 4.000  | 0.00   | 0.00   | 0.00   | 4.00   | 0.00   |
| 1.00   | 1.00   | 1.000  | 3.00   | 0.00   | 1.00   | 3.00   | 2.00   |
| #NULL! | #NULL! | #NULL! | #NULL! | #NULL! | #NULL! | #NULL! | #NULL! |
| 0.00   | 3.00   | 0.000  | 2.00   | 0.00   | 0.00   | 0.00   | 0.00   |
| 4.00   | 0.00   | 0.000  | 0.00   | 0.00   | 0.00   | 0.00   | 0.00   |
| 1.00   | 1.00   | 4.000  | 2.00   | 3.00   | 1.00   | 3.00   | 1.00   |
| 1.00   | 1.00   | 3.000  | 3.00   | 1.00   | 1.00   | 1.00   | 1.00   |
| 0.00   | 3.00   | 0.000  | 2.00   | 0.00   | 0.00   | 0.00   | 0.00   |
| 1.00   | 1.00   | 1.000  | 1.00   | 1.00   | 1.00   | 2.00   | 1.00   |
| 1.00   | 3.00   | 3.000  | 2.00   | 1.00   | 1.00   | 2.00   | 1.00   |
| 0.00   | 0.00   | 4.000  | 3.00   | 0.00   | 0.00   | 3.00   | 0.00   |
| 1.00   | 1.00   | 3.000  | 4.00   | 1.00   | 0.00   | 1.00   | 1.00   |
| 0.00   | 0.00   | 0.000  | 3.00   | 0.00   | 0.00   | 0.00   | 0.00   |
| 1.00   | 1.00   | 3.000  | 1.00   | 1.00   | 1.00   | 3.00   | 3.00   |
| 0.00   | 0.00   | 4.000  | 2.00   | 0.00   | 0.00   | 0.00   | 0.00   |
| 1.00   | 1.00   | 4.000  | 3.00   | 1.00   | 1.00   | 1.00   | 1.00   |
| 1.00   | 1.00   | 3.000  | 3.00   | 1.00   | 1.00   | 1.00   | 1.00   |
| 3.00   | 1.00   | 2.000  | 3.00   | 3.00   | 1.00   | 2.00   | 2.00   |
| #NULL! | #NULL! | #NULL! | #NULL! | #NULL! | #NULL! | #NULL! | #NULL! |
| 1.00   | 1.00   | 2.000  | 3.00   | 1.00   | 1.00   | 3.00   | 1.00   |
| 1.00   | 2.00   | 3.000  | 2.00   | 1.00   | 2.00   | 2.00   | 1.00   |
| 1.00   | 1.00   | 2.000  | 1.00   | 1.00   | 1.00   | 2.00   | 1.00   |
| 3.00   | 2.00   | 3.000  | 3.00   | 0.00   | 0.00   | 3.00   | 0.00   |
| 1.00   | 1.00   | 1.000  | 4.00   | 1.00   | 1.00   | 1.00   | 1.00   |
| 2.00   | 2.00   | 2.000  | 3.00   | 2.00   | 2.00   | 1.00   | 1.00   |
| 1.00   | 1.00   | 4.000  | 3.00   | 0.00   | 3.00   | 2.00   | 0.00   |
| 1.00   | 2.00   | 3.000  | 3.00   | 3.00   | 1.00   | 1.00   | 1.00   |
| 1.00   | 3.00   | 2.000  | 1.00   | 1.00   | 1.00   | 2.00   | 1.00   |
| 0.00   | 0.00   | 4.000  | 3.00   | 1.00   | 1.00   | 3.00   | 0.00   |
| 2.00   | 1.00   | 3.000  | 1.00   | 1.00   | 1.00   | 2.00   | 1.00   |
| #NULL! | #NULL! | #NULL! | #NULL! | #NULL! | #NULL! | #NULL! | #NULL! |
| 2.00   | 0.00   | 3.000  | 3.00   | 0.00   | 0.00   | 1.00   | 0.00   |
| 1.00   | 1.00   | 3.000  | 2.00   | 1.00   | 2.00   | 3.00   | 2.00   |
| 2.00   | 2.00   | 3.000  | 1.00   | 1.00   | 0.00   | 2.00   | 1.00   |
| #NULL! | #NULL! | #NULL! | #NULL! | #NULL! | #NULL! | #NULL! | #NULL! |
| 1.00   | 1.00   | 3.000  | 2.00   | 1.00   | 0.00   | 1.00   | 1.00   |



|        |        |        |        |        |        |        |        |
|--------|--------|--------|--------|--------|--------|--------|--------|
| 1.00   | 1.00   | 1.000  | 2.00   | 0.00   | 1.00   | 3.00   | 1.00   |
| 1.00   | 2.00   | 3.000  | 3.00   | 2.00   | 1.00   | 2.00   | 1.00   |
| 0.00   | 0.00   | 4.000  | 3.00   | 1.00   | 0.00   | 3.00   | 0.00   |
| #NULL! | #NULL! | #NULL! | #NULL! | #NULL! | #NULL! | #NULL! | #NULL! |
| 1.00   | 1.00   | 3.000  | 2.00   | 1.00   | 1.00   | 1.00   | 1.00   |
| 1.00   | 0.00   | 4.000  | 4.00   | 0.00   | 0.00   | 0.00   | 0.00   |
| 3.00   | 2.00   | 1.000  | 3.00   | 1.00   | 1.00   | 1.00   | 1.00   |
| 0.00   | 0.00   | 4.000  | 4.00   | 1.00   | 0.00   | 1.00   | 0.00   |
| #NULL! | #NULL! | #NULL! | #NULL! | #NULL! | #NULL! | #NULL! | #NULL! |
| 1.00   | 3.00   | 1.000  | 4.00   | 1.00   | 1.00   | 4.00   | 3.00   |
| 0.00   | 0.00   | 3.000  | 3.00   | 0.00   | 0.00   | 0.00   | 0.00   |
| 1.00   | 0.00   | 3.000  | 3.00   | 0.00   | 0.00   | 0.00   | 0.00   |
| 1.00   | 0.00   | 3.000  | 1.00   | 1.00   | 0.00   | 1.00   | 1.00   |
| 1.00   | 1.00   | 3.000  | 3.00   | 2.00   | 1.00   | 1.00   | 1.00   |
| 0.00   | 0.00   | 4.000  | 3.00   | 0.00   | 0.00   | 0.00   | #NULL! |
| #NULL! | #NULL! | #NULL! | #NULL! | #NULL! | #NULL! | #NULL! | #NULL! |
| 1.00   | 0.00   | 2.000  | 3.00   | 0.00   | 0.00   | 1.00   | 1.00   |
| #NULL! | #NULL! | #NULL! | #NULL! | #NULL! | #NULL! | #NULL! | #NULL! |
| 0.00   | 0.00   | 4.000  | 4.00   | 0.00   | 0.00   | 0.00   | 0.00   |
| 1.00   | 1.00   | 3.000  | 2.00   | 2.00   | 3.00   | 3.00   | 1.00   |
| #NULL! | #NULL! | #NULL! | #NULL! | #NULL! | #NULL! | #NULL! | #NULL! |
| 0.00   | 1.00   | 2.000  | 2.00   | 0.00   | 0.00   | 0.00   | 0.00   |
| #NULL! | #NULL! | #NULL! | #NULL! | #NULL! | #NULL! | #NULL! | #NULL! |
| 0.00   | 2.00   | 3.000  | 1.00   | 3.00   | 2.00   | 0.00   | 1.00   |
| 3.00   | 0.00   | 2.000  | 3.00   | 3.00   | 1.00   | 1.00   | 3.00   |
| 2.00   | 0.00   | 2.000  | 3.00   | 0.00   | 0.00   | 0.00   | 0.00   |
| 0.00   | 0.00   | 3.000  | 1.00   | 3.00   | 0.00   | 3.00   | 3.00   |
| 1.00   | 0.00   | 3.000  | 3.00   | 1.00   | 1.00   | 3.00   | 1.00   |
| #NULL! | #NULL! | #NULL! | #NULL! | #NULL! | #NULL! | #NULL! | #NULL! |
| #NULL! | #NULL! | #NULL! | #NULL! | #NULL! | #NULL! | #NULL! | #NULL! |
| 1.00   | 0.00   | 3.000  | 2.00   | 1.00   | 0.00   | 999.00 | 1.00   |
| 1.00   | 1.00   | 3.000  | 3.00   | 1.00   | 0.00   | 1.00   | 0.00   |
| 1.00   | 1.00   | 2.000  | 2.00   | 999.00 | 2.00   | 2.00   | 2.00   |
| 2.00   | 0.00   | 1.000  | 2.00   | 2.00   | 1.00   | 2.00   | 2.00   |
| 2.00   | 2.00   | 2.000  | 3.00   | 1.00   | 1.00   | 3.00   | 2.00   |
| 0.00   | 0.00   | 4.000  | 3.00   | 0.00   | 0.00   | 2.00   | 0.00   |
| #NULL! | #NULL! | #NULL! | #NULL! | #NULL! | #NULL! | #NULL! | #NULL! |
| 2.00   | 0.00   | 2.000  | 3.00   | 1.00   | 1.00   | 3.00   | 1.00   |
| 1.00   | 0.00   | 1.000  | 4.00   | 1.00   | 1.00   | #NULL! | 1.00   |
| #NULL! | #NULL! | #NULL! | #NULL! | #NULL! | #NULL! | #NULL! | #NULL! |
| 1.00   | 2.00   | 2.000  | 4.00   | 4.00   | 2.00   | 4.00   | 3.00   |
| 2.00   | 0.00   | 4.000  | 3.00   | 3.00   | 1.00   | 2.00   | 3.00   |
| 1.00   | 0.00   | 3.000  | 3.00   | 2.00   | 1.00   | 1.00   | 3.00   |
| 1.00   | 1.00   | 3.000  | 3.00   | 2.00   | 1.00   | 2.00   | 1.00   |
| 1.00   | 3.00   | 3.000  | 3.00   | 0.00   | 1.00   | 0.00   | 1.00   |
| 0.00   | 0.00   | 4.000  | 4.00   | 0.00   | 0.00   | 0.00   | 0.00   |
| 3.00   | 1.00   | 3.000  | 4.00   | 2.00   | 1.00   | 1.00   | 3.00   |
| 1.00   | 4.00   | 3.000  | 3.00   | 0.00   | 0.00   | 0.00   | 0.00   |
| 2.00   | 1.00   | 3.000  | 4.00   | 0.00   | 1.00   | 2.00   | 1.00   |
| 2.00   | 3.00   | 4.000  | 4.00   | 1.00   | 1.00   | 1.00   | 1.00   |
| 0.00   | 0.00   | 3.000  | 1.00   | 0.00   | 0.00   | 1.00   | 0.00   |
| #NULL! | #NULL! | #NULL! | #NULL! | #NULL! | #NULL! | #NULL! | #NULL! |
| 0.00   | 2.00   | 0.000  | 2.00   | 0.00   | 1.00   | 1.00   | 0.00   |
| 1.00   | 0.00   | 3.000  | 3.00   | 1.00   | 0.00   | 1.00   | 1.00   |
| 1.00   | 1.00   | 3.000  | 3.00   | 2.00   | 2.00   | 0.00   | 2.00   |
| 1.00   | 3.00   | 4.000  | 3.00   | 1.00   | 3.00   | 1.00   | 1.00   |

|        |        |        |        |        |        |        |        |
|--------|--------|--------|--------|--------|--------|--------|--------|
| 2.00   | 0.00   | 3.000  | 4.00   | 3.00   | 2.00   | 1.00   | 3.00   |
| 0.00   | 0.00   | 4.000  | 3.00   | 0.00   | 0.00   | 3.00   | 0.00   |
| 0.00   | 3.00   | 4.000  | 4.00   | 0.00   | 2.00   | 0.00   | 0.00   |
| 1.00   | 0.00   | 1.000  | 3.00   | 1.00   | 1.00   | 1.00   | 1.00   |
| #NULL! | #NULL! | #NULL! | #NULL! | #NULL! | #NULL! | #NULL! | #NULL! |
| 0.00   | 0.00   | 4.000  | 4.00   | 0.00   | 1.00   | 1.00   | 0.00   |
| 3.00   | 1.00   | 4.000  | 1.00   | 4.00   | 0.00   | 1.00   | 1.00   |
| 0.00   | 0.00   | 4.000  | 4.00   | 0.00   | 0.00   | 0.00   | 0.00   |
| 0.00   | 4.00   | 3.000  | 1.00   | 0.00   | 4.00   | 1.00   | 0.00   |
| 3.00   | 2.00   | 3.000  | 3.00   | 3.00   | 2.00   | 3.00   | 2.00   |
| 3.00   | 3.00   | 3.000  | 3.00   | 3.00   | 3.00   | 2.00   | 3.00   |
| 0.00   | 0.00   | 3.000  | 2.00   | 0.00   | 0.00   | 3.00   | 0.00   |
| 3.00   | 1.00   | 1.000  | 4.00   | 1.00   | 2.00   | 4.00   | 1.00   |
| 1.00   | 1.00   | 3.000  | 3.00   | 2.00   | 1.00   | 2.00   | 2.00   |
| 2.00   | 3.00   | 3.000  | 3.00   | 3.00   | 3.00   | 3.00   | 1.00   |
| #NULL! | #NULL! | #NULL! | #NULL! | #NULL! | #NULL! | #NULL! | #NULL! |
| 1.00   | 2.00   | 3.000  | 2.00   | 2.00   | 1.00   | 2.00   | 1.00   |
| 0.00   | 0.00   | 4.000  | 3.00   | 1.00   | 0.00   | 1.00   | 1.00   |
| 3.00   | 2.00   | 1.000  | 4.00   | 2.00   | 3.00   | 3.00   | 2.00   |
| #NULL! | #NULL! | #NULL! | #NULL! | #NULL! | #NULL! | #NULL! | #NULL! |
| 0.00   | 0.00   | 4.000  | 3.00   | 0.00   | 0.00   | 0.00   | 0.00   |
| #NULL! | #NULL! | #NULL! | #NULL! | #NULL! | #NULL! | #NULL! | #NULL! |
| 0.00   | 0.00   | 3.000  | 3.00   | 0.00   | 1.00   | 1.00   | 1.00   |
| 1.00   | 3.00   | 3.000  | 3.00   | 0.00   | 0.00   | 2.00   | 0.00   |
| 0.00   | 0.00   | 4.000  | 3.00   | 0.00   | 0.00   | 2.00   | 0.00   |
| 1.00   | 1.00   | 4.000  | 2.00   | 0.00   | 0.00   | 2.00   | 1.00   |
| 3.00   | 3.00   | 3.000  | 3.00   | 3.00   | 2.00   | 1.00   | 3.00   |
| 0.00   | 0.00   | 4.000  | 1.00   | 0.00   | 0.00   | 3.00   | 0.00   |
| 2.00   | 2.00   | 1.000  | 3.00   | 1.00   | 2.00   | 1.00   | 2.00   |
| 0.00   | 3.00   | 3.000  | 2.00   | 1.00   | 2.00   | 3.00   | 1.00   |
| 0.00   | 1.00   | 0.000  | 3.00   | 1.00   | 2.00   | 3.00   | 1.00   |
| #NULL! | #NULL! | #NULL! | #NULL! | #NULL! | #NULL! | #NULL! | #NULL! |
| 1.00   | 4.00   | 1.000  | 4.00   | 3.00   | 3.00   | 1.00   | 1.00   |
| #NULL! | #NULL! | #NULL! | #NULL! | #NULL! | #NULL! | #NULL! | #NULL! |
| 2.00   | 0.00   | 0.000  | 2.00   | 2.00   | 1.00   | 3.00   | 2.00   |
| 1.00   | 2.00   | 3.000  | 3.00   | 1.00   | 1.00   | 1.00   | 1.00   |
| #NULL! | #NULL! | #NULL! | #NULL! | #NULL! | #NULL! | #NULL! | #NULL! |
| 3.00   | 0.00   | 2.000  | 1.00   | 3.00   | 0.00   | 3.00   | 3.00   |
| 3.00   | 1.00   | 3.000  | 3.00   | 2.00   | 2.00   | 1.00   | 3.00   |
| 1.00   | 2.00   | 3.000  | 3.00   | 0.00   | 0.00   | 1.00   | 1.00   |
| #NULL! | #NULL! | #NULL! | #NULL! | #NULL! | #NULL! | #NULL! | #NULL! |
| 1.00   | 1.00   | 3.000  | 2.00   | 2.00   | 1.00   | 2.00   | 1.00   |
| 2.00   | 0.00   | 2.000  | 0.00   | 0.00   | 0.00   | 2.00   | 0.00   |
| 0.00   | 0.00   | 3.000  | 3.00   | 0.00   | 0.00   | 0.00   | 0.00   |
| 1.00   | 3.00   | 3.000  | 3.00   | 0.00   | 1.00   | 0.00   | 1.00   |
| #NULL! | #NULL! | #NULL! | #NULL! | #NULL! | #NULL! | #NULL! | #NULL! |
| 0.00   | 0.00   | 4.000  | 1.00   | 0.00   | 0.00   | 3.00   | 0.00   |
| 1.00   | 0.00   | 3.000  | 3.00   | 1.00   | 0.00   | 0.00   | 0.00   |
| 1.00   | 1.00   | 1.000  | 1.00   | 1.00   | 1.00   | 1.00   | 2.00   |
| #NULL! | #NULL! | #NULL! | #NULL! | #NULL! | #NULL! | #NULL! | #NULL! |
| 1.00   | 1.00   | 4.000  | 2.00   | 0.00   | 0.00   | 1.00   | 0.00   |
| 1.00   | 1.00   | 1.000  | 2.00   | 1.00   | 1.00   | 1.00   | 1.00   |
| 1.00   | 0.00   | 3.000  | 2.00   | 3.00   | 1.00   | 1.00   | 2.00   |
| 0.00   | 3.00   | 4.000  | 1.00   | 0.00   | 4.00   | 1.00   | 2.00   |
| #NULL! | #NULL! | #NULL! | #NULL! | #NULL! | #NULL! | #NULL! | #NULL! |
| 1.00   | 1.00   | 4.000  | 2.00   | 1.00   | 1.00   | 1.00   | 1.00   |

|        |        |        |        |        |        |        |        |
|--------|--------|--------|--------|--------|--------|--------|--------|
| 1.00   | 1.00   | 1.000  | 1.00   | 1.00   | 2.00   | 1.00   | 1.00   |
| 1.00   | 2.00   | 3.000  | 3.00   | 1.00   | 2.00   | 2.00   | 2.00   |
| 2.00   | 1.00   | 2.000  | 3.00   | 1.00   | 0.00   | 1.00   | 0.00   |
| 2.00   | 3.00   | 2.000  | 3.00   | 3.00   | 3.00   | 1.00   | 3.00   |
| 2.00   | 1.00   | 3.000  | 2.00   | 2.00   | 1.00   | 2.00   | 1.00   |
| 1.00   | 0.00   | 2.000  | 2.00   | 1.00   | 0.00   | 0.00   | 1.00   |
| 0.00   | 2.00   | 4.000  | 3.00   | 0.00   | 0.00   | 0.00   | 1.00   |
| #NULL! | #NULL! | #NULL! | #NULL! | #NULL! | #NULL! | #NULL! | #NULL! |
| 1.00   | 2.00   | 3.000  | 2.00   | 1.00   | 2.00   | 1.00   | 1.00   |
| 2.00   | 1.00   | 2.000  | 2.00   | 2.00   | 2.00   | 3.00   | 2.00   |
| 1.00   | 0.00   | 3.000  | 1.00   | 0.00   | 0.00   | 1.00   | 1.00   |
| #NULL! | #NULL! | #NULL! | #NULL! | #NULL! | #NULL! | #NULL! | #NULL! |
| #NULL! | #NULL! | #NULL! | #NULL! | #NULL! | #NULL! | #NULL! | #NULL! |
| 1.00   | 2.00   | 3.000  | 2.00   | 1.00   | 3.00   | 1.00   | 1.00   |
| 1.00   | 2.00   | 2.000  | 2.00   | 1.00   | 1.00   | 2.00   | 2.00   |
| 1.00   | 1.00   | 3.000  | 4.00   | 3.00   | 1.00   | 0.00   | 1.00   |
| 2.00   | 2.00   | 1.000  | 2.00   | 0.00   | 1.00   | 1.00   | 2.00   |
| 2.00   | 0.00   | 2.000  | 1.00   | 1.00   | 0.00   | 2.00   | 1.00   |
| 999.00 | 3.00   | 4.000  | 4.00   | 1.00   | 1.00   | 4.00   | 1.00   |
| 0.00   | 0.00   | 4.000  | 4.00   | 2.00   | 0.00   | 0.00   | 999.00 |
| 0.00   | 2.00   | 4.000  | 2.00   | 0.00   | 2.00   | 2.00   | 0.00   |
| 1.00   | 3.00   | 3.000  | 3.00   | 1.00   | 1.00   | 1.00   | 1.00   |
| 0.00   | 0.00   | 4.000  | 3.00   | 2.00   | 0.00   | 4.00   | 0.00   |
| 4.00   | 3.00   | 3.000  | 3.00   | 4.00   | 3.00   | 999.00 | 3.00   |
| 2.00   | 3.00   | 2.000  | 2.00   | 1.00   | 1.00   | 1.00   | 2.00   |
| 2.00   | 1.00   | 0.000  | 0.00   | 1.00   | 1.00   | 3.00   | 2.00   |
| 3.00   | 1.00   | 1.000  | 2.00   | 1.00   | 0.00   | 1.00   | 2.00   |
| 0.00   | 0.00   | 2.000  | 1.00   | 2.00   | 0.00   | 0.00   | 0.00   |
| 0.00   | 0.00   | 4.000  | 4.00   | 0.00   | 0.00   | 0.00   | 0.00   |
| 1.00   | 1.00   | 4.000  | 4.00   | 1.00   | 1.00   | 1.00   | 1.00   |
| 4.00   | 1.00   | 1.000  | 3.00   | 2.00   | 2.00   | 2.00   | 2.00   |
| 0.00   | 3.00   | 3.000  | 4.00   | 3.00   | 0.00   | 0.00   | 0.00   |
| 1.00   | 1.00   | 2.000  | 2.00   | 1.00   | 1.00   | 1.00   | 1.00   |
| 3.00   | 0.00   | 1.000  | 2.00   | 1.00   | 0.00   | 2.00   | 0.00   |
| 0.00   | 0.00   | 0.000  | 1.00   | 0.00   | 0.00   | 0.00   | 0.00   |
| #NULL! | #NULL! | #NULL! | #NULL! | #NULL! | #NULL! | #NULL! | #NULL! |
| 1.00   | 0.00   | 1.000  | 1.00   | 1.00   | 0.00   | 2.00   | 1.00   |
| 0.00   | 0.00   | 4.000  | 0.00   | 0.00   | 0.00   | 0.00   | 3.00   |
| 1.00   | 0.00   | 3.000  | 3.00   | 1.00   | 0.00   | 1.00   | 2.00   |
| 1.00   | 1.00   | 4.000  | 3.00   | 1.00   | 0.00   | 0.00   | 1.00   |
| 0.00   | 0.00   | 0.000  | 1.00   | 2.00   | 0.00   | 1.00   | 1.00   |
| 3.00   | 0.00   | 1.000  | 1.00   | 0.00   | 0.00   | 3.00   | 3.00   |
| 1.00   | 1.00   | 2.000  | 2.00   | 2.00   | 1.00   | 3.00   | 2.00   |
| 1.00   | 1.00   | 3.000  | 3.00   | 0.00   | 1.00   | 0.00   | 1.00   |
| 2.00   | 1.00   | 3.000  | 3.00   | 0.00   | 1.00   | 1.00   | 1.00   |
| #NULL! | #NULL! | #NULL! | #NULL! | #NULL! | #NULL! | #NULL! | #NULL! |
| 2.00   | 1.00   | 1.000  | 1.00   | 1.00   | 2.00   | 3.00   | 1.00   |
| 0.00   | 2.00   | 2.000  | 3.00   | 3.00   | 2.00   | 1.00   | 1.00   |
| 1.00   | 1.00   | 3.000  | 4.00   | 1.00   | 0.00   | 0.00   | 1.00   |
| 2.00   | 1.00   | 3.000  | 2.00   | 1.00   | 0.00   | 1.00   | 1.00   |
| 1.00   | 1.00   | 3.000  | 4.00   | 2.00   | 1.00   | 1.00   | 1.00   |
| 1.00   | 0.00   | 3.000  | 3.00   | 4.00   | 0.00   | 0.00   | 3.00   |
| 1.00   | 1.00   | 2.000  | 1.00   | 1.00   | 2.00   | 1.00   | 2.00   |
| #NULL! | #NULL! | #NULL! | #NULL! | #NULL! | #NULL! | #NULL! | #NULL! |
| 4.00   | 4.00   | 1.000  | 2.00   | 3.00   | 3.00   | 2.00   | 2.00   |
| 2.00   | 0.00   | 2.000  | 1.00   | 1.00   | 0.00   | 2.00   | 1.00   |

|        |        |        |        |        |        |        |        |
|--------|--------|--------|--------|--------|--------|--------|--------|
| 0.00   | 1.00   | 3.000  | 2.00   | 1.00   | 0.00   | 0.00   | 1.00   |
| 1.00   | 1.00   | 3.000  | 2.00   | 1.00   | 1.00   | 1.00   | 2.00   |
| 0.00   | 0.00   | 3.000  | 4.00   | 0.00   | 0.00   | 0.00   | 0.00   |
| 0.00   | 0.00   | 3.000  | 4.00   | 0.00   | 0.00   | 0.00   | 0.00   |
| #NULL! | #NULL! | #NULL! | #NULL! | #NULL! | #NULL! | #NULL! | #NULL! |
| #NULL! | #NULL! | #NULL! | #NULL! | #NULL! | #NULL! | #NULL! | #NULL! |
| 0.00   | 0.00   | 4.000  | 4.00   | 0.00   | 0.00   | 0.00   | 0.00   |
| 1.00   | 1.00   | 2.000  | 2.00   | 3.00   | 1.00   | 2.00   | 2.00   |
| 0.00   | 4.00   | 4.000  | 4.00   | 0.00   | 3.00   | 3.00   | 1.00   |
| 0.00   | 0.00   | 0.000  | 0.00   | 0.00   | 0.00   | 0.00   | 0.00   |
| 0.00   | 0.00   | 3.000  | 0.00   | 1.00   | 1.00   | 3.00   | 0.00   |
| 1.00   | 1.00   | 4.000  | 3.00   | 1.00   | 0.00   | 0.00   | 3.00   |
| 0.00   | 0.00   | 3.000  | 3.00   | 2.00   | 0.00   | 0.00   | 0.00   |
| 1.00   | 3.00   | 2.000  | 4.00   | 2.00   | 1.00   | 1.00   | 3.00   |
| 0.00   | 0.00   | 4.000  | 4.00   | 1.00   | 0.00   | 1.00   | 0.00   |
| 0.00   | 2.00   | 2.000  | 3.00   | 1.00   | 1.00   | 1.00   | 1.00   |
| 4.00   | 1.00   | 2.000  | 2.00   | 4.00   | 4.00   | 2.00   | 4.00   |
| 1.00   | 1.00   | 3.000  | 2.00   | 1.00   | 0.00   | 1.00   | 1.00   |



|        |        |        |        |        |        |        |        |
|--------|--------|--------|--------|--------|--------|--------|--------|
| 2.00   | 1.00   | 0.00   | 0.00   | 0.00   | 3.00   | 3.00   | 4.00   |
| 4.00   | 0.00   | 3.00   | 1.00   | 0.00   | 1.00   | 2.00   | 4.00   |
| 3.00   | 0.00   | 0.00   | 0.00   | 0.00   | 0.00   | 3.00   | 0.00   |
| 4.00   | 0.00   | 3.00   | 0.00   | 0.00   | 0.00   | 0.00   | 0.00   |
| 4.00   | 1.00   | 0.00   | 1.00   | 0.00   | 0.00   | 0.00   | 0.00   |
| #NULL! | #NULL! | #NULL! | #NULL! | #NULL! | #NULL! | #NULL! | #NULL! |
| 3.00   | 3.00   | 2.00   | 0.00   | 0.00   | 4.00   | 2.00   | 4.00   |
| 3.00   | 0.00   | 1.00   | 0.00   | 0.00   | 2.00   | 2.00   | 0.00   |
| 3.00   | 1.00   | 2.00   | 1.00   | 4.00   | 0.00   | 4.00   | 3.00   |
| 2.00   | 1.00   | 1.00   | 2.00   | 2.00   | 3.00   | 3.00   | 3.00   |
| 3.00   | 0.00   | 1.00   | 0.00   | 0.00   | 2.00   | 4.00   | 1.00   |
| 3.00   | 3.00   | 0.00   | 0.00   | 0.00   | 0.00   | 0.00   | 0.00   |
| 4.00   | 0.00   | 0.00   | 0.00   | 0.00   | 0.00   | 0.00   | 0.00   |
| 2.00   | 2.00   | 1.00   | 1.00   | 2.00   | 3.00   | 2.00   | 3.00   |
| 2.00   | 2.00   | 1.00   | 1.00   | 1.00   | 1.00   | 1.00   | 1.00   |
| 4.00   | 1.00   | 0.00   | 0.00   | 0.00   | 0.00   | 0.00   | 0.00   |
| 3.00   | 1.00   | 3.00   | 0.00   | 1.00   | 1.00   | 3.00   | 1.00   |
| 3.00   | 1.00   | 2.00   | 1.00   | 1.00   | 2.00   | 1.00   | 1.00   |
| 2.00   | 1.00   | 1.00   | 999.00 | 999.00 | 4.00   | 1.00   | 1.00   |
| 3.00   | 2.00   | 1.00   | 1.00   | 1.00   | 1.00   | 2.00   | 1.00   |
| 4.00   | 0.00   | 0.00   | 0.00   | 0.00   | 0.00   | 4.00   | 0.00   |
| 3.00   | 1.00   | 4.00   | 0.00   | 0.00   | 3.00   | 0.00   | 4.00   |
| #NULL! | #NULL! | #NULL! | #NULL! | #NULL! | #NULL! | #NULL! | #NULL! |
| 0.00   | 0.00   | 0.00   | 0.00   | 0.00   | 4.00   | 4.00   | 4.00   |
| 4.00   | 0.00   | 0.00   | 2.00   | 2.00   | 2.00   | 0.00   | 0.00   |
| 2.00   | 1.00   | 1.00   | 1.00   | 1.00   | 2.00   | 2.00   | 1.00   |
| 2.00   | 2.00   | 1.00   | 1.00   | 0.00   | 3.00   | 3.00   | 3.00   |
| 4.00   | 0.00   | 2.00   | 0.00   | 1.00   | 1.00   | 1.00   | 0.00   |
| 2.00   | 1.00   | 2.00   | 1.00   | 1.00   | 3.00   | 2.00   | 2.00   |
| 3.00   | 1.00   | 1.00   | 1.00   | 1.00   | 1.00   | 1.00   | 2.00   |
| 4.00   | 0.00   | 1.00   | 0.00   | 0.00   | 2.00   | 1.00   | 0.00   |
| 4.00   | 1.00   | 0.00   | 1.00   | 0.00   | 2.00   | 0.00   | 0.00   |
| 3.00   | 0.00   | 4.00   | 0.00   | 0.00   | 0.00   | 0.00   | 0.00   |
| 3.00   | 1.00   | 1.00   | 1.00   | 1.00   | 1.00   | 1.00   | 1.00   |
| 4.00   | 0.00   | 2.00   | 0.00   | 1.00   | 3.00   | 2.00   | 2.00   |
| 4.00   | 1.00   | 1.00   | 1.00   | 1.00   | 1.00   | 1.00   | 1.00   |
| 1.00   | 1.00   | 1.00   | 1.00   | 1.00   | 1.00   | 3.00   | 1.00   |
| 3.00   | 3.00   | 1.00   | 2.00   | 1.00   | 3.00   | 2.00   | 1.00   |
| #NULL! | #NULL! | #NULL! | #NULL! | #NULL! | #NULL! | #NULL! | #NULL! |
| 3.00   | 2.00   | 1.00   | 1.00   | 1.00   | 3.00   | 3.00   | 3.00   |
| 4.00   | 1.00   | 1.00   | 1.00   | 0.00   | 2.00   | 2.00   | 1.00   |
| 2.00   | 1.00   | 1.00   | 1.00   | 0.00   | 2.00   | 3.00   | 3.00   |
| 3.00   | 0.00   | 1.00   | 0.00   | 1.00   | 2.00   | 0.00   | 3.00   |
| 4.00   | 1.00   | 1.00   | 1.00   | 1.00   | 1.00   | 1.00   | 1.00   |
| 3.00   | 2.00   | 0.00   | 3.00   | 1.00   | 2.00   | 2.00   | 2.00   |
| 0.00   | 0.00   | 0.00   | 0.00   | 0.00   | 1.00   | 0.00   | 0.00   |
| 2.00   | 1.00   | 2.00   | 1.00   | 1.00   | 2.00   | 2.00   | 3.00   |
| 3.00   | 1.00   | 1.00   | 1.00   | 1.00   | 1.00   | 2.00   | 2.00   |
| 3.00   | 0.00   | 3.00   | 0.00   | 0.00   | 0.00   | 1.00   | 0.00   |
| 2.00   | 2.00   | 3.00   | 2.00   | 1.00   | 2.00   | 3.00   | 2.00   |
| #NULL! | #NULL! | #NULL! | #NULL! | #NULL! | #NULL! | #NULL! | #NULL! |
| 3.00   | 0.00   | 0.00   | 0.00   | 0.00   | 2.00   | 2.00   | 1.00   |
| 0.00   | 1.00   | 1.00   | 1.00   | 1.00   | 3.00   | 3.00   | 1.00   |
| 4.00   | 1.00   | 1.00   | 1.00   | 2.00   | 1.00   | 1.00   | 3.00   |
| #NULL! | #NULL! | #NULL! | #NULL! | #NULL! | #NULL! | #NULL! | #NULL! |
| 2.00   | 1.00   | 0.00   | 0.00   | 0.00   | 0.00   | 1.00   | 1.00   |



|        |        |        |        |        |        |        |        |
|--------|--------|--------|--------|--------|--------|--------|--------|
| 3.00   | 1.00   | 0.00   | 0.00   | 1.00   | 2.00   | 4.00   | 0.00   |
| 4.00   | 0.00   | 0.00   | 0.00   | 0.00   | 2.00   | 1.00   | 0.00   |
| 4.00   | 0.00   | 0.00   | 0.00   | 0.00   | 0.00   | 0.00   | 0.00   |
| 3.00   | 1.00   | 1.00   | 0.00   | 0.00   | 2.00   | 0.00   | 0.00   |
| #NULL! | #NULL! | #NULL! | #NULL! | #NULL! | #NULL! | #NULL! | #NULL! |
| 4.00   | 0.00   | 0.00   | 0.00   | 0.00   | 0.00   | 1.00   | 0.00   |
| 4.00   | 1.00   | 1.00   | 1.00   | 1.00   | 2.00   | 2.00   | 3.00   |
| 4.00   | 0.00   | 0.00   | 0.00   | 0.00   | 0.00   | 0.00   | 0.00   |
| 0.00   | 1.00   | 0.00   | 2.00   | 0.00   | 4.00   | 3.00   | 4.00   |
| 3.00   | 1.00   | 1.00   | 2.00   | 3.00   | 1.00   | 1.00   | 3.00   |
| 2.00   | 1.00   | 2.00   | 1.00   | 1.00   | 3.00   | 4.00   | 2.00   |
| 4.00   | 1.00   | 0.00   | 0.00   | 0.00   | 0.00   | 2.00   | 0.00   |
| 4.00   | 0.00   | 0.00   | 1.00   | 1.00   | 1.00   | 0.00   | 3.00   |
| 3.00   | 1.00   | 3.00   | 999.00 | 3.00   | 3.00   | 1.00   | 1.00   |
| 1.00   | 1.00   | 0.00   | 0.00   | 0.00   | 0.00   | 4.00   | 4.00   |
| #NULL! | #NULL! | #NULL! | #NULL! | #NULL! | #NULL! | #NULL! | #NULL! |
| 3.00   | 1.00   | 1.00   | 2.00   | 1.00   | 2.00   | 1.00   | 1.00   |
| 4.00   | 1.00   | 2.00   | 1.00   | 1.00   | 2.00   | 0.00   | 2.00   |
| 4.00   | 1.00   | 1.00   | 1.00   | 0.00   | 2.00   | 3.00   | 3.00   |
| #NULL! | #NULL! | #NULL! | #NULL! | #NULL! | #NULL! | #NULL! | #NULL! |
| 4.00   | 0.00   | 0.00   | 0.00   | 2.00   | 4.00   | 2.00   | 4.00   |
| #NULL! | #NULL! | #NULL! | #NULL! | #NULL! | #NULL! | #NULL! | #NULL! |
| 3.00   | 1.00   | 1.00   | 1.00   | 0.00   | 3.00   | 3.00   | 2.00   |
| 3.00   | 1.00   | 1.00   | 0.00   | 0.00   | 1.00   | 2.00   | 0.00   |
| 4.00   | 0.00   | 0.00   | 4.00   | 0.00   | 2.00   | 4.00   | 0.00   |
| 4.00   | 0.00   | 1.00   | 1.00   | 1.00   | 1.00   | 2.00   | 1.00   |
| 4.00   | 1.00   | 2.00   | 1.00   | 1.00   | 1.00   | 1.00   | 1.00   |
| 3.00   | 0.00   | 0.00   | 0.00   | 0.00   | 1.00   | 3.00   | 0.00   |
| 4.00   | 1.00   | 1.00   | 1.00   | 1.00   | 1.00   | 2.00   | 2.00   |
| 4.00   | 0.00   | 4.00   | 1.00   | 1.00   | 0.00   | 2.00   | 3.00   |
| 4.00   | 2.00   | 0.00   | 1.00   | 1.00   | 1.00   | 1.00   | 0.00   |
| #NULL! | #NULL! | #NULL! | #NULL! | #NULL! | #NULL! | #NULL! | #NULL! |
| 2.00   | 2.00   | 1.00   | 3.00   | 2.00   | 3.00   | 1.00   | 4.00   |
| #NULL! | #NULL! | #NULL! | #NULL! | #NULL! | #NULL! | #NULL! | #NULL! |
| 2.00   | 1.00   | 2.00   | 1.00   | 4.00   | 2.00   | 1.00   | 4.00   |
| 3.00   | 1.00   | 2.00   | 1.00   | 1.00   | 2.00   | 1.00   | 1.00   |
| #NULL! | #NULL! | #NULL! | #NULL! | #NULL! | #NULL! | #NULL! | #NULL! |
| 4.00   | 1.00   | 0.00   | 3.00   | 2.00   | 1.00   | 1.00   | 1.00   |
| 3.00   | 3.00   | 3.00   | 3.00   | 3.00   | 4.00   | 0.00   | 4.00   |
| 4.00   | 0.00   | 1.00   | 0.00   | 0.00   | 2.00   | 1.00   | 1.00   |
| #NULL! | #NULL! | #NULL! | #NULL! | #NULL! | #NULL! | #NULL! | #NULL! |
| 3.00   | 1.00   | 2.00   | 1.00   | 2.00   | 1.00   | 1.00   | 1.00   |
| 0.00   | 1.00   | 0.00   | 0.00   | 1.00   | 1.00   | 1.00   | 4.00   |
| 4.00   | 0.00   | 3.00   | 0.00   | 0.00   | 3.00   | 0.00   | 3.00   |
| 3.00   | 0.00   | 2.00   | 1.00   | 1.00   | 1.00   | 1.00   | 1.00   |
| #NULL! | #NULL! | #NULL! | #NULL! | #NULL! | #NULL! | #NULL! | #NULL! |
| 4.00   | 0.00   | 0.00   | 0.00   | 0.00   | 1.00   | 2.00   | 0.00   |
| 3.00   | 0.00   | 1.00   | 0.00   | 0.00   | 3.00   | 3.00   | 1.00   |
| 4.00   | 0.00   | 1.00   | 0.00   | 0.00   | 0.00   | 0.00   | 0.00   |
| #NULL! | #NULL! | #NULL! | #NULL! | #NULL! | #NULL! | #NULL! | #NULL! |
| 4.00   | 1.00   | 1.00   | 1.00   | 1.00   | 1.00   | 1.00   | 1.00   |
| 3.00   | 1.00   | 1.00   | 1.00   | 2.00   | 1.00   | 1.00   | 3.00   |
| 2.00   | 1.00   | 0.00   | 0.00   | 1.00   | 2.00   | 4.00   | 1.00   |
| 2.00   | 1.00   | 0.00   | 0.00   | 3.00   | 2.00   | 4.00   | 3.00   |
| #NULL! | #NULL! | #NULL! | #NULL! | #NULL! | #NULL! | #NULL! | #NULL! |
| 3.00   | 1.00   | 2.00   | 1.00   | 1.00   | 1.00   | 1.00   | 1.00   |







| Tas_18_P3_ε | Tas_19_P3_ε | Tas_20_P3_ε | P_Activity_P3 | Height_P3 | Weight_P3 |
|-------------|-------------|-------------|---------------|-----------|-----------|
| 3.00        | 2.00        | 0.00        | #NULL!        | #NULL!    | #NULL!    |
| 4.00        | 4.00        | 0.00        | 55.00         | 163.00    | 81.00     |
| 3.00        | 3.00        | 2.00        | #NULL!        | #NULL!    | #NULL!    |
| 3.00        | 3.00        | 0.00        | 3.00          | 178.00    | 84.00     |
| #NULL!      | #NULL!      | #NULL!      | #NULL!        | #NULL!    | #NULL!    |
| 2.00        | 0.00        | 0.00        | 10.00         | 181.00    | 85.00     |
| 3.00        | 2.00        | 2.00        | 8.00          | 162.00    | 63.00     |
| 3.00        | 3.00        | 1.00        | #NULL!        | #NULL!    | #NULL!    |
| 0.00        | 0.00        | 1.00        | 8.00          | 175.00    | 80.00     |
| 4.00        | 4.00        | 3.00        | #NULL!        | #NULL!    | #NULL!    |
| 4.00        | 4.00        | 1.00        | 7.00          | 159.00    | 74.80     |
| 3.00        | 3.00        | 1.00        | 6.50          | 153.00    | 61.00     |
| 4.00        | 4.00        | 0.00        | 3.00          | 155.00    | 68.00     |
| 3.00        | 3.00        | 3.00        | 10.00         | 184.00    | 92.00     |
| 3.00        | 2.00        | 1.00        | #NULL!        | #NULL!    | #NULL!    |
| #NULL!      | #NULL!      | #NULL!      | #NULL!        | #NULL!    | #NULL!    |
| 3.00        | 3.00        | 2.00        | 4.00          | 152.00    | 64.00     |
| 0.00        | 2.00        | 0.00        | 5.00          | 157.00    | 62.10     |
| 2.00        | 2.00        | 4.00        | #NULL!        | #NULL!    | #NULL!    |
| 3.00        | 1.00        | 4.00        | 0.00          | 162.00    | 62.00     |
| 3.00        | 2.00        | 2.00        | 6.00          | 172.00    | 86.60     |
| 4.00        | 4.00        | 0.00        | #NULL!        | #NULL!    | #NULL!    |
| 2.00        | 2.00        | 2.00        | #NULL!        | #NULL!    | #NULL!    |
| 2.00        | 2.00        | 2.00        | #NULL!        | #NULL!    | #NULL!    |
| 1.00        | 4.00        | 0.00        | 1.00          | 163.00    | 61.40     |
| 3.00        | 4.00        | 1.00        | 10.00         | 158.00    | 61.50     |
| 4.00        | 4.00        | 4.00        | #NULL!        | #NULL!    | #NULL!    |
| 3.00        | 3.00        | 4.00        | #NULL!        | #NULL!    | #NULL!    |
| 3.00        | 1.00        | 1.00        | 0.00          | 180.00    | 92.00     |
| 0.00        | 2.00        | 1.00        | 10.00         | 147.00    | 58.00     |
| 2.00        | 2.00        | 1.00        | #NULL!        | #NULL!    | #NULL!    |
| 1.00        | 3.00        | 1.00        | 5.00          | 182.00    | 73.00     |
| 3.00        | 3.00        | 3.00        | 2.00          | 158.00    | 56.00     |
| 3.00        | 1.00        | 4.00        | 2.00          | 173.00    | 85.20     |
| #NULL!      | #NULL!      | #NULL!      | 1.00          | 125.00    | 81.00     |
| #NULL!      | #NULL!      | #NULL!      | #NULL!        | #NULL!    | #NULL!    |
| #NULL!      | #NULL!      | #NULL!      | #NULL!        | #NULL!    | #NULL!    |
| #NULL!      | #NULL!      | #NULL!      | #NULL!        | #NULL!    | #NULL!    |
| 3.00        | 3.00        | 1.00        | 4.00          | 158.00    | 68.10     |
| 3.00        | 3.00        | 1.00        | 1.00          | 165.00    | 67.00     |
| 4.00        | 2.00        | 2.00        | #NULL!        | #NULL!    | #NULL!    |
| 3.00        | 3.00        | 0.00        | 3.00          | 150.00    | 57.00     |
| 3.00        | 2.00        | 0.00        | #NULL!        | #NULL!    | #NULL!    |
| #NULL!      | #NULL!      | #NULL!      | #NULL!        | #NULL!    | #NULL!    |
| 3.00        | 3.00        | 1.00        | #NULL!        | #NULL!    | #NULL!    |
| 0.00        | 1.00        | 2.00        | #NULL!        | #NULL!    | #NULL!    |
| 4.00        | 4.00        | 1.00        | #NULL!        | #NULL!    | #NULL!    |
| #NULL!      | #NULL!      | #NULL!      | #NULL!        | #NULL!    | #NULL!    |
| 4.00        | 3.00        | 0.00        | 2.00          | 179.00    | 79.00     |
| 4.00        | 4.00        | 0.00        | 7.00          | 160.00    | 62.00     |
| 3.00        | 4.00        | 0.00        | #NULL!        | #NULL!    | #NULL!    |
| #NULL!      | #NULL!      | #NULL!      | #NULL!        | #NULL!    | #NULL!    |
| 4.00        | 4.00        | 0.00        | 2.00          | 157.00    | 56.10     |
| 3.00        | 4.00        | 0.00        | 2.00          | 172.00    | 82.00     |
| #NULL!      | #NULL!      | #NULL!      | #NULL!        | #NULL!    | #NULL!    |

|        |        |        |        |        |        |
|--------|--------|--------|--------|--------|--------|
| 3.00   | 2.00   | 3.00   | 5.00   | 161.00 | 64.00  |
| 3.00   | 4.00   | 0.00   | 5.00   | 163.00 | 70.40  |
| 3.00   | 3.00   | 0.00   | 3.00   | 169.00 | 158.00 |
| 4.00   | 0.00   | 0.00   | 10.00  | 178.00 | 73.00  |
| 0.00   | 0.00   | 0.00   | #NULL! | #NULL! | #NULL! |
| #NULL! | #NULL! | #NULL! | #NULL! | #NULL! | #NULL! |
| 2.00   | 2.00   | 4.00   | 5.00   | 176.00 | 69.00  |
| 4.00   | 3.00   | 1.00   | 5.00   | 184.00 | 90.00  |
| 3.00   | 2.00   | 1.00   | 2.50   | 156.00 | 98.00  |
| 3.00   | 2.00   | 3.00   | 8.00   | 173.00 | 62.00  |
| 2.00   | 2.00   | 4.00   | 5.00   | 172.00 | 74.00  |
| 0.00   | 0.00   | 2.00   | 4.00   | 149.00 | 58.00  |
| 4.00   | 4.00   | 2.00   | 2.00   | 158.00 | 71.00  |
| 2.00   | 2.00   | 1.00   | #NULL! | #NULL! | #NULL! |
| 2.00   | 2.00   | 1.00   | 4.00   | 165.00 | 64.00  |
| 4.00   | 4.00   | 0.00   | #NULL! | #NULL! | #NULL! |
| 3.00   | 3.00   | 4.00   | 10.00  | 180.00 | 70.10  |
| 3.00   | 3.00   | 2.00   | 6.00   | 167.00 | 66.50  |
| 2.00   | 2.00   | 1.00   | 8.00   | 168.00 | 68.90  |
| 3.00   | 3.00   | 1.00   | 0.00   | 163.00 | 73.00  |
| 4.00   | 0.00   | 0.00   | 5.00   | 183.00 | 92.00  |
| 3.00   | 3.00   | 0.00   | 3.00   | 173.00 | 89.00  |
| #NULL! | #NULL! | #NULL! | #NULL! | #NULL! | #NULL! |
| 4.00   | 0.00   | 4.00   | 0.00   | 170.00 | 76.00  |
| 4.00   | 4.00   | 0.00   | 6.00   | 167.00 | 94.60  |
| 3.00   | 3.00   | 1.00   | 5.00   | 170.00 | 79.40  |
| 3.00   | 2.00   | 1.00   | #NULL! | #NULL! | #NULL! |
| 3.00   | 4.00   | 0.00   | 3.00   | 171.00 | 77.00  |
| 3.00   | 2.00   | 3.00   | 3.00   | 168.00 | 73.00  |
| 3.00   | 3.00   | 3.00   | 0.00   | 166.00 | 76.00  |
| 3.00   | 3.00   | 0.00   | 2.00   | 180.00 | 95.00  |
| 4.00   | 4.00   | 1.00   | 5.00   | 183.00 | 80.00  |
| 4.00   | 4.00   | 0.00   | 10.00  | 156.00 | 55.00  |
| 3.00   | 3.00   | 3.00   | #NULL! | #NULL! | #NULL! |
| 3.00   | 3.00   | 4.00   | #NULL! | #NULL! | #NULL! |
| 4.00   | 4.00   | 1.00   | 3.00   | 167.00 | 81.00  |
| 3.00   | 2.00   | 1.00   | 2.50   | 172.00 | 85.00  |
| 3.00   | 3.00   | 1.00   | 6.00   | 168.00 | 63.40  |
| #NULL! | #NULL! | #NULL! | 3.00   | 178.00 | 88.00  |
| 3.00   | 3.00   | 3.00   | 6.00   | 170.00 | 69.00  |
| 0.00   | 3.00   | 1.00   | 2.00   | 171.00 | 81.00  |
| 3.00   | 1.00   | 3.00   | #NULL! | #NULL! | #NULL! |
| 3.00   | 3.00   | 3.00   | 4.00   | 167.00 | 78.00  |
| 4.00   | 4.00   | 1.00   | 4.00   | 165.00 | 93.00  |
| 2.00   | 3.00   | 2.00   | 0.00   | 164.00 | 87.30  |
| 4.00   | 2.00   | 1.00   | 6.00   | 169.00 | 88.50  |
| 1.00   | 3.00   | 1.00   | 7.00   | 163.00 | 63.90  |
| 4.00   | 1.00   | 1.00   | 4.50   | 168.00 | 93.00  |
| 2.00   | 3.00   | 2.00   | 5.00   | 159.00 | 47.48  |
| 3.00   | 3.00   | 3.00   | 7.00   | 172.00 | 80.00  |
| #NULL! | #NULL! | #NULL! | #NULL! | #NULL! | #NULL! |
| 2.00   | 3.00   | 2.00   | #NULL! | #NULL! | #NULL! |
| 2.00   | 1.00   | 3.00   | #NULL! | #NULL! | #NULL! |
| 4.00   | 4.00   | 0.00   | 10.00  | 165.00 | 68.20  |
| #NULL! | #NULL! | #NULL! | 1.00   | 165.00 | 67.00  |
| 4.00   | 2.00   | 1.00   | 3.00   | 161.00 | 74.00  |

|        |        |        |        |        |        |
|--------|--------|--------|--------|--------|--------|
| 3.00   | 4.00   | 1.00   | 1.00   | 159.00 | 71.90  |
| 3.00   | 3.00   | 2.00   | 22.00  | 175.00 | 73.00  |
| 4.00   | 1.00   | 0.00   | #NULL! | #NULL! | #NULL! |
| #NULL! | #NULL! | #NULL! | #NULL! | #NULL! | #NULL! |
| 3.00   | 3.00   | 1.00   | 7.00   | 172.00 | 67.00  |
| 4.00   | #NULL! | 3.00   | #NULL! | #NULL! | #NULL! |
| 1.00   | 3.00   | 3.00   | 3.00   | 173.00 | 82.60  |
| 4.00   | 4.00   | 1.00   | 4.00   | 153.00 | 55.00  |
| #NULL! | #NULL! | #NULL! | #NULL! | #NULL! | #NULL! |
| 4.00   | 3.00   | 0.00   | 0.00   | 162.00 | 70.00  |
| 3.00   | 4.00   | 0.00   | #NULL! | #NULL! | #NULL! |
| 3.00   | 2.00   | 0.00   | 7.00   | 152.00 | 49.80  |
| 4.00   | 3.00   | 1.00   | 5.00   | 157.00 | 81.00  |
| 3.00   | 3.00   | 2.00   | 0.00   | 173.00 | 93.00  |
| 3.00   | 3.00   | 4.00   | 4.00   | 188.00 | 82.00  |
| #NULL! | #NULL! | #NULL! | #NULL! | #NULL! | #NULL! |
| 3.00   | 2.00   | 0.00   | 5.00   | 172.00 | 82.00  |
| #NULL! | #NULL! | #NULL! | #NULL! | #NULL! | #NULL! |
| 4.00   | 4.00   | 2.00   | #NULL! | #NULL! | #NULL! |
| 3.00   | 3.00   | 2.00   | 6.00   | 162.00 | 69.70  |
| #NULL! | #NULL! | #NULL! | 0.00   | 168.00 | 67.30  |
| 4.00   | 1.00   | 1.00   | 5.00   | 174.00 | 67.00  |
| #NULL! | #NULL! | #NULL! | #NULL! | #NULL! | #NULL! |
| 1.00   | 2.00   | 3.00   | 2.00   | 172.00 | 87.00  |
| 3.00   | 3.00   | 3.00   | 10.00  | 164.00 | 66.50  |
| 3.00   | 3.00   | 1.00   | 3.00   | 174.00 | 65.30  |
| 3.00   | 4.00   | 3.00   | #NULL! | #NULL! | #NULL! |
| 3.00   | 3.00   | 1.00   | #NULL! | #NULL! | #NULL! |
| #NULL! | #NULL! | #NULL! | #NULL! | #NULL! | #NULL! |
| #NULL! | #NULL! | #NULL! | #NULL! | #NULL! | #NULL! |
| 3.00   | 3.00   | 0.00   | 2.00   | 172.00 | 77.00  |
| 4.00   | 4.00   | 3.00   | 10.00  | 164.00 | 81.00  |
| 4.00   | 4.00   | 4.00   | 3.00   | 163.00 | 80.00  |
| 3.00   | 2.00   | 1.00   | #NULL! | #NULL! | #NULL! |
| 2.00   | 2.00   | 2.00   | 7.00   | 172.00 | 84.00  |
| 4.00   | 4.00   | 0.00   | 7.00   | 162.00 | 66.00  |
| #NULL! | #NULL! | #NULL! | #NULL! | #NULL! | #NULL! |
| 3.00   | 3.00   | 3.00   | 1.00   | 168.00 | 61.00  |
| 2.00   | 3.00   | 4.00   | #NULL! | #NULL! | #NULL! |
| #NULL! | #NULL! | #NULL! | #NULL! | #NULL! | #NULL! |
| 4.00   | 4.00   | 2.00   | #NULL! | #NULL! | #NULL! |
| 3.00   | 3.00   | 0.00   | 3.00   | 170.00 | 61.20  |
| 2.00   | 2.00   | 0.00   | 7.00   | 178.00 | 59.90  |
| 3.00   | 2.00   | 2.00   | #NULL! | #NULL! | #NULL! |
| 3.00   | 4.00   | 0.00   | 8.00   | 160.00 | 57.00  |
| 3.00   | 3.00   | 0.00   | 5.00   | 150.00 | 51.00  |
| 3.00   | 3.00   | 0.00   | 5.00   | 175.00 | 73.50  |
| 3.00   | 3.00   | 0.00   | 8.00   | 150.00 | 51.00  |
| 4.00   | 2.00   | 1.00   | #NULL! | #NULL! | #NULL! |
| 4.00   | 1.00   | 1.00   | 2.00   | 160.00 | 84.30  |
| 3.00   | 2.00   | 2.00   | 3.00   | 180.00 | 84.50  |
| #NULL! | #NULL! | #NULL! | #NULL! | #NULL! | #NULL! |
| 4.00   | 3.00   | 0.00   | 0.00   | 164.00 | 67.00  |
| 3.00   | 3.00   | 1.00   | 10.00  | 184.00 | 90.80  |
| 4.00   | 3.00   | 4.00   | 5.00   | 168.00 | 75.40  |
| 4.00   | 3.00   | 0.00   | 3.00   | 158.00 | 54.50  |

|        |        |        |        |        |        |
|--------|--------|--------|--------|--------|--------|
| 3.00   | 3.00   | 0.00   | #NULL! | #NULL! | #NULL! |
| 2.00   | 4.00   | 0.00   | 3.00   | 162.00 | 72.30  |
| 0.00   | 4.00   | 0.00   | 0.00   | 184.00 | 110.00 |
| 0.00   | 0.00   | 2.00   | 0.00   | 155.00 | 86.30  |
| #NULL! | #NULL! | #NULL! | #NULL! | #NULL! | #NULL! |
| 4.00   | 4.00   | 3.00   | 4.00   | 155.00 | 66.80  |
| 1.00   | 1.00   | 3.00   | #NULL! | #NULL! | #NULL! |
| 4.00   | 4.00   | 0.00   | 4.50   | 168.00 | 86.00  |
| 0.00   | 0.00   | 0.00   | 0.00   | 165.00 | 65.00  |
| 3.00   | 3.00   | 1.00   | 10.00  | 168.00 | 71.90  |
| 2.00   | 3.00   | 0.00   | 5.00   | 155.00 | 81.70  |
| 3.00   | 2.00   | 0.00   | 1.00   | 186.00 | 110.00 |
| 2.00   | 1.00   | 0.00   | 0.00   | 157.00 | 59.50  |
| 3.00   | 3.00   | 2.00   | #NULL! | #NULL! | #NULL! |
| 4.00   | 0.00   | 0.00   | #NULL! | #NULL! | #NULL! |
| #NULL! | #NULL! | #NULL! | #NULL! | #NULL! | #NULL! |
| 3.00   | 2.00   | 2.00   | #NULL! | #NULL! | #NULL! |
| 3.00   | 3.00   | 0.00   | 7.00   | 170.00 | 78.00  |
| 4.00   | 3.00   | 1.00   | #NULL! | #NULL! | #NULL! |
| #NULL! | #NULL! | #NULL! | #NULL! | #NULL! | #NULL! |
| 4.00   | 4.00   | 2.00   | 6.00   | 149.00 | 58.00  |
| #NULL! | #NULL! | #NULL! | #NULL! | #NULL! | #NULL! |
| 4.00   | 2.00   | 3.00   | 5.00   | 191.00 | 107.00 |
| 4.00   | 3.00   | 2.00   | #NULL! | #NULL! | #NULL! |
| 2.00   | 3.00   | 0.00   | #NULL! | #NULL! | #NULL! |
| 4.00   | 4.00   | 1.00   | #NULL! | #NULL! | #NULL! |
| 3.00   | 4.00   | 2.00   | #NULL! | #NULL! | #NULL! |
| 4.00   | 4.00   | 0.00   | 10.00  | 164.00 | 85.00  |
| 3.00   | 4.00   | 0.00   | 3.00   | 162.00 | 69.00  |
| 4.00   | 3.00   | 2.00   | 4.00   | 188.00 | 74.00  |
| 4.00   | 3.00   | 1.00   | 0.00   | 172.00 | 97.00  |
| #NULL! | #NULL! | #NULL! | #NULL! | #NULL! | #NULL! |
| 3.00   | 3.00   | 3.00   | 3.00   | 172.00 | 81.00  |
| #NULL! | #NULL! | #NULL! | #NULL! | #NULL! | #NULL! |
| 4.00   | 2.00   | 0.00   | 6.00   | 171.00 | 70.00  |
| 3.00   | 3.00   | 0.00   | 7.00   | 158.00 | 59.00  |
| #NULL! | #NULL! | #NULL! | #NULL! | #NULL! | #NULL! |
| 3.00   | 3.00   | 1.00   | 4.00   | 175.00 | 83.00  |
| 4.00   | 1.00   | 3.00   | 8.00   | 170.00 | 69.00  |
| 2.00   | 2.00   | 0.00   | 2.00   | 158.00 | 70.00  |
| #NULL! | #NULL! | #NULL! | #NULL! | #NULL! | #NULL! |
| 3.00   | 2.00   | 1.00   | 33.00  | 158.00 | 54.00  |
| 4.00   | 1.00   | 4.00   | #NULL! | #NULL! | #NULL! |
| 4.00   | 4.00   | 0.00   | 5.00   | 156.50 | 61.20  |
| 3.00   | 4.00   | 1.00   | 1.00   | 162.00 | 68.00  |
| #NULL! | #NULL! | #NULL! | #NULL! | #NULL! | #NULL! |
| 4.00   | 3.00   | 1.00   | #NULL! | #NULL! | #NULL! |
| 3.00   | 3.00   | 1.00   | 7.00   | 161.00 | 77.00  |
| 4.00   | 4.00   | 0.00   | #NULL! | #NULL! | #NULL! |
| #NULL! | #NULL! | #NULL! | 0.00   | 165.00 | 74.00  |
| 4.00   | 3.00   | 1.00   | #NULL! | #NULL! | #NULL! |
| 999.00 | 3.00   | 2.00   | #NULL! | #NULL! | #NULL! |
| 2.00   | 2.00   | 2.00   | #NULL! | #NULL! | #NULL! |
| 3.00   | 3.00   | 0.00   | 3.00   | 179.00 | 71.00  |
| #NULL! | #NULL! | #NULL! | #NULL! | #NULL! | #NULL! |
| 4.00   | 1.00   | 3.00   | #NULL! | #NULL! | #NULL! |

|        |        |        |        |        |        |
|--------|--------|--------|--------|--------|--------|
| 3.00   | 3.00   | 3.00   | 5.00   | 161.00 | 75.30  |
| 3.00   | 3.00   | 3.00   | #NULL! | #NULL! | #NULL! |
| 3.00   | 3.00   | 1.00   | 2.00   | 174.00 | 86.20  |
| 3.00   | 3.00   | 1.00   | #NULL! | #NULL! | #NULL! |
| 3.00   | 3.00   | 1.00   | 2.00   | 178.00 | 78.00  |
| 3.00   | 2.00   | 1.00   | 3.00   | 158.00 | 59.00  |
| 3.00   | 0.00   | 0.00   | 4.00   | 165.00 | 69.00  |
| #NULL! | #NULL! | #NULL! | #NULL! | #NULL! | #NULL! |
| 3.00   | 1.00   | 0.00   | 1.00   | 161.00 | 84.30  |
| 4.00   | 2.00   | 2.00   | #NULL! | #NULL! | #NULL! |
| 3.00   | 3.00   | 1.00   | 6.00   | 163.00 | 70.00  |
| #NULL! | #NULL! | #NULL! | #NULL! | #NULL! | #NULL! |
| #NULL! | #NULL! | #NULL! | #NULL! | #NULL! | #NULL! |
| 3.00   | 2.00   | 1.00   | #NULL! | #NULL! | #NULL! |
| 3.00   | 2.00   | 2.00   | 0.00   | 180.00 | 88.70  |
| 3.00   | 3.00   | 2.00   | 0.00   | 176.00 | 120.00 |
| 2.00   | 4.00   | 1.00   | 6.00   | 158.00 | 55.00  |
| 2.00   | 1.00   | 2.00   | 2.00   | 190.00 | 92.00  |
| 4.00   | 4.00   | 1.00   | #NULL! | #NULL! | #NULL! |
| 4.00   | 4.00   | 1.00   | #NULL! | #NULL! | #NULL! |
| 4.00   | 3.00   | 1.00   | 0.00   | 161.00 | 62.00  |
| 3.00   | 3.00   | 1.00   | 10.00  | 160.00 | 63.00  |
| 3.00   | 1.00   | 1.00   | 0.00   | 173.00 | 81.00  |
| 3.00   | 999.00 | 1.00   | #NULL! | #NULL! | #NULL! |
| 3.00   | 3.00   | 1.00   | 2.50   | 159.00 | 87.30  |
| 0.00   | 2.00   | 2.00   | 6.00   | 159.00 | 64.00  |
| 3.00   | 2.00   | 1.00   | 5.50   | 170.00 | 60.00  |
| 2.00   | 1.00   | 2.00   | 2.00   | 158.00 | 110.00 |
| 3.00   | 4.00   | 0.00   | 4.50   | 170.00 | 50.00  |
| 4.00   | 1.00   | 0.00   | 0.00   | 157.00 | 62.00  |
| 2.00   | 3.00   | 1.00   | 2.00   | 158.00 | 65.00  |
| 4.00   | 3.00   | 3.00   | #NULL! | #NULL! | #NULL! |
| 3.00   | 3.00   | 2.00   | 4.00   | 160.00 | 65.00  |
| 1.00   | 2.00   | 4.00   | #NULL! | #NULL! | #NULL! |
| 2.00   | 3.00   | 0.00   | 2.00   | 181.00 | 88.00  |
| #NULL! | #NULL! | #NULL! | #NULL! | #NULL! | #NULL! |
| 3.00   | 2.00   | 4.00   | #NULL! | #NULL! | #NULL! |
| 4.00   | 4.00   | 0.00   | 6.00   | 165.00 | 68.00  |
| 3.00   | 3.00   | 1.00   | 2.00   | 161.00 | 61.70  |
| 3.00   | 3.00   | 0.00   | 2.00   | 162.00 | 66.00  |
| 4.00   | 2.00   | 0.00   | #NULL! | #NULL! | #NULL! |
| 3.00   | 1.00   | 1.00   | 0.00   | 165.00 | 83.00  |
| 2.00   | 2.00   | 1.00   | #NULL! | #NULL! | #NULL! |
| 3.00   | 3.00   | 1.00   | 0.00   | 162.00 | 80.00  |
| 4.00   | 4.00   | 3.00   | 8.00   | 180.00 | 82.00  |
| #NULL! | #NULL! | #NULL! | #NULL! | #NULL! | #NULL! |
| 2.00   | 1.00   | 1.00   | #NULL! | #NULL! | #NULL! |
| 4.00   | 2.00   | 1.00   | 0.00   | 163.00 | 68.30  |
| 3.00   | 3.00   | 1.00   | 0.00   | 156.00 | 58.00  |
| 4.00   | 4.00   | 0.00   | 3.00   | 159.00 | 57.00  |
| 3.00   | 4.00   | 0.00   | 2.00   | 163.00 | 69.00  |
| 4.00   | 3.00   | 1.00   | 3.00   | 164.00 | 59.50  |
| 3.00   | 2.00   | 1.00   | #NULL! | #NULL! | #NULL! |
| #NULL! | #NULL! | #NULL! | 0.00   | 160.00 | 58.00  |
| 1.00   | 3.00   | 1.00   | 22.00  | 172.00 | 69.00  |
| 3.00   | 3.00   | 1.00   | 2.00   | 159.00 | 2.00   |

|        |        |        |        |        |        |
|--------|--------|--------|--------|--------|--------|
| 3.00   | 4.00   | 0.00   | 2.00   | 163.00 | 58.30  |
| 3.00   | 4.00   | 2.00   | 3.00   | 180.00 | 100.00 |
| 3.00   | 3.00   | 0.00   | 5.00   | 174.00 | 76.00  |
| 4.00   | 4.00   | 0.00   | #NULL! | #NULL! | #NULL! |
| #NULL! | #NULL! | #NULL! | #NULL! | #NULL! | #NULL! |
| #NULL! | #NULL! | #NULL! | #NULL! | #NULL! | #NULL! |
| 0.00   | 0.00   | 0.00   | 0.00   | 174.00 | 110.00 |
| 3.00   | 2.00   | 1.00   | #NULL! | #NULL! | #NULL! |
| 4.00   | 3.00   | 0.00   | #NULL! | #NULL! | #NULL! |
| 3.00   | 3.00   | 3.00   | #NULL! | #NULL! | #NULL! |
| 1.00   | 1.00   | 3.00   | 4.00   | 180.00 | 80.00  |
| 4.00   | 1.00   | 3.00   | 3.00   | 168.00 | 71.40  |
| 3.00   | 3.00   | 0.00   | 2.00   | 184.00 | 86.00  |
| 4.00   | 4.00   | 3.00   | #NULL! | #NULL! | #NULL! |
| 3.00   | 3.00   | 0.00   | 5.00   | 155.00 | 85.00  |
| 2.00   | 3.00   | 2.00   | 3.00   | 158.00 | 60.00  |
| 4.00   | 3.00   | 4.00   | #NULL! | #NULL! | #NULL! |
| 3.00   | 2.00   | 1.00   | #NULL! | #NULL! | #NULL! |



| Chronic_Dis_P3                                      | extroversion_P3 | agreeableness_P3 | consciencious_P3 |
|-----------------------------------------------------|-----------------|------------------|------------------|
|                                                     | 3.71            | 2.25             | 2.71             |
| 0                                                   | 4.00            | 4.25             | 2.71             |
|                                                     | 2.43            | 3.25             | 4.29             |
| 0                                                   | 3.29            | 3.88             | 4.00             |
|                                                     | 2.57            | 4.00             | 4.86             |
| 0                                                   | 3.25            | 4.25             | 4.43             |
| 0                                                   | 3.29            | 4.38             | 3.86             |
|                                                     | 3.57            | 3.38             | 4.43             |
| hypertension, colesterol                            | 3.14            | 4.25             | 3.29             |
|                                                     | 3.43            | 4.38             | 4.14             |
| hypertension, blood lipids                          | 3.14            | 4.25             | 4.14             |
| hypertension                                        | 3.57            | 3.50             | 3.14             |
| 0                                                   | 2.86            | 4.63             | 3.14             |
| colesterol                                          | 3.86            | 3.63             | 4.14             |
|                                                     | 2.57            | 3.75             | 3.43             |
|                                                     | 3.29            | 3.75             | 4.29             |
| 0                                                   | 3.29            | 4.00             | 4.57             |
| Hypertension                                        | 2.00            | 3.75             | 4.00             |
|                                                     | 3.67            | 3.00             | 2.67             |
| Osteoporosis, blood pressure, cholesterol           | 2.29            | 4.25             | 3.29             |
| 0                                                   | 4.29            | 3.88             | 3.86             |
|                                                     | 3.71            | 3.00             | 4.14             |
|                                                     | 2.57            | 3.75             | 4.57             |
|                                                     | 3.29            | 3.88             | 3.43             |
| לפני כשנתיים תקף וירוס את המערכת הוסטיבולרית ועדיין | 4.00            | 3.63             | 2.86             |
| cholesterol                                         | 4.57            | 4.38             | 2.86             |
|                                                     | 4.57            | 3.00             | 4.86             |
|                                                     | 2.86            | 4.13             | 3.14             |
| hypertension, BPH                                   | 3.38            | 3.50             | 3.00             |
| 0                                                   | 3.57            | 3.75             | 4.14             |
|                                                     | 3.43            | 4.75             | 3.86             |
| 0                                                   | 2.86            | 4.75             | 3.29             |
| 0                                                   | 2.43            | 3.00             | 4.00             |
|                                                     | 3.43            | 3.25             | 4.29             |
| polio                                               | 3.29            | 4.14             | 2.86             |
|                                                     | 3.14            | 4.00             | 3.17             |
|                                                     | 2.00            | 4.13             | 3.86             |
|                                                     | 3.57            | 3.13             | 2.86             |
| 0                                                   | 2.38            | 4.00             | 3.86             |
| 0                                                   | 3.57            | 4.88             | 2.86             |
|                                                     | 3.86            | 3.25             | 3.67             |
| 0                                                   | 3.71            | 4.00             | 3.57             |
|                                                     | 3.71            | 4.13             | 3.86             |
|                                                     | 3.14            | 4.13             | 3.71             |
|                                                     | 4.14            | 4.25             | 2.57             |
|                                                     | 3.71            | 3.38             | 3.57             |
|                                                     | 3.57            | 4.88             | 4.29             |
|                                                     | 2.43            | 4.50             | 4.86             |
| Coeliac disease                                     | 3.00            | 4.38             | 4.57             |
| Melanoma                                            | 3.57            | 2.88             | 4.00             |
|                                                     | 3.43            | 4.38             | 5.00             |
|                                                     | 3.86            | 4.38             | 2.86             |
| 0                                                   | 4.29            | 4.75             | 4.00             |
| 3 catheterizations                                  | 3.86            | 4.13             | 4.29             |
|                                                     | #NULL!          | #NULL!           | #NULL!           |

|                                                    |        |        |        |
|----------------------------------------------------|--------|--------|--------|
| hypertension, Joint ossification, Osteoporosis, Th | 2.29   | 3.63   | 3.00   |
| 0                                                  | 3.57   | 4.38   | 3.86   |
| טרשת נפוצה.                                        | 3.00   | 4.38   | 4.14   |
| diabetes                                           | 3.57   | 3.88   | 4.71   |
|                                                    | 3.33   | 3.63   | 4.57   |
|                                                    | 4.00   | 3.88   | 4.71   |
| 0                                                  | 2.43   | 3.75   | 4.57   |
| 0                                                  | 3.57   | 4.38   | 3.71   |
| Diabetes                                           | 3.00   | 4.13   | 2.86   |
| 0                                                  | 3.00   | 3.00   | 3.71   |
| 0                                                  | 3.86   | 4.25   | 3.43   |
| 0                                                  | 3.57   | 4.00   | 4.57   |
| 0                                                  | 3.29   | 4.38   | 4.43   |
|                                                    | 3.14   | 3.75   | 3.86   |
| 0                                                  | 2.57   | 4.00   | 3.43   |
|                                                    | 3.00   | 3.75   | 2.86   |
| 0                                                  | 2.57   | 4.75   | 5.00   |
| 0                                                  | 2.43   | 4.00   | 5.00   |
| Asthma                                             | 3.57   | 4.13   | 2.86   |
| cholesterol                                        | 2.43   | 4.75   | 3.71   |
| נאמר לו שיתכן ויש לו טרשת נפוצה                    | 3.71   | 4.50   | 3.57   |
| 0                                                  | 3.29   | 4.25   | 3.00   |
|                                                    | 3.86   | 3.63   | 4.86   |
| Diabetes, cholesterol, hypertension                | 2.43   | 4.00   | 3.14   |
| 999                                                | 2.00   | 3.50   | 3.57   |
| Cholesterol                                        | 3.57   | 3.88   | 4.29   |
|                                                    | 3.14   | 4.00   | 3.57   |
| 0                                                  | 3.43   | 4.71   | 4.50   |
| high blood pressure                                | 2.71   | 4.13   | 4.29   |
| 0                                                  | 2.57   | 4.88   | 4.71   |
| 0                                                  | 4.00   | 4.63   | 3.86   |
| Chronic intestinal disease                         | 2.71   | 4.88   | 3.71   |
| 0                                                  | 4.14   | 4.50   | 2.86   |
|                                                    | 3.14   | 4.00   | 3.29   |
|                                                    | 3.71   | 3.88   | 4.86   |
| 0                                                  | 3.86   | 4.13   | 4.29   |
| hypertension                                       | 3.00   | 3.75   | 3.43   |
| 0                                                  | 4.00   | 3.13   | 3.71   |
| Depression                                         | 2.14   | 4.13   | 3.57   |
| 0                                                  | 2.43   | 3.50   | 4.14   |
| 0                                                  | 3.43   | 3.00   | 3.00   |
|                                                    | 3.14   | 4.25   | 4.00   |
| 0                                                  | 2.14   | 4.00   | 4.86   |
| Aulcos, Hypertension, Astma                        | 3.86   | 3.50   | 3.57   |
| Diabetes,Under activity of the thyroid gland       | 3.00   | 3.25   | 3.71   |
|                                                    | 3.00   | 3.63   | 3.57   |
| Breast cance 10 years ago                          | 2.86   | 3.25   | 4.71   |
| 0                                                  | 3.00   | 4.38   | 2.71   |
| 0                                                  | 3.71   | 3.38   | 3.43   |
| 0                                                  | 3.00   | 3.75   | 2.86   |
|                                                    | 4.00   | 3.00   | 4.00   |
|                                                    | 3.71   | 5.00   | 5.00   |
|                                                    | 3.14   | 4.63   | 4.57   |
| 0                                                  | 4.00   | 3.63   | 3.14   |
| 0                                                  | #NULL! | #NULL! | #NULL! |
| Cholersterol)                                      | 2.57   | 3.38   | 2.71   |

|                                                   |        |        |        |
|---------------------------------------------------|--------|--------|--------|
| 0                                                 | 3.71   | 2.86   | 4.57   |
| Cholesterol                                       | 2.86   | 3.50   | 4.29   |
|                                                   | 3.14   | 4.00   | 3.50   |
|                                                   | 2.00   | 3.63   | 3.43   |
| 0                                                 | 3.29   | 2.75   | 3.86   |
|                                                   | 2.50   | 4.00   | 3.83   |
| 0                                                 | 2.86   | 3.50   | 3.57   |
| 0                                                 | 4.13   | 4.25   | 2.86   |
|                                                   | #NULL! | #NULL! | #NULL! |
| 0                                                 | 2.43   | 3.13   | 4.71   |
|                                                   | 3.14   | 4.25   | 4.29   |
| 0                                                 | 3.86   | 3.88   | 3.86   |
| 0                                                 | 2.43   | 4.25   | 4.57   |
| Diabetes, hypertension, cholesterol               | 3.88   | 2.75   | 3.57   |
| Thyroid Cancer                                    | 3.14   | 4.50   | 4.00   |
|                                                   | 2.29   | 3.75   | 3.33   |
| 0                                                 | 4.43   | 4.13   | 2.57   |
|                                                   | 3.71   | 4.50   | 4.14   |
|                                                   | 2.86   | 4.25   | 3.71   |
| 0                                                 | 3.75   | 3.50   | 3.00   |
| 0                                                 | 3.14   | 3.88   | 4.14   |
| 0                                                 | 3.14   | 2.88   | 3.71   |
|                                                   | 2.29   | 4.00   | 3.57   |
| Asthma                                            | 2.29   | 2.88   | 2.14   |
| 0                                                 | 2.71   | 4.88   | 4.29   |
| 0                                                 | 3.00   | 2.38   | 3.43   |
|                                                   | 4.29   | 4.00   | 4.33   |
|                                                   | 3.71   | 4.00   | 3.86   |
|                                                   | 2.86   | 2.75   | 4.71   |
|                                                   | 3.57   | 2.38   | 4.29   |
| 0                                                 | 3.57   | 3.25   | 3.29   |
| 0                                                 | 4.43   | 4.88   | 4.86   |
| hypertantion, Diabetes,Liver problems,Osteoarthri | 2.57   | 4.25   | 3.00   |
|                                                   | 2.43   | 3.50   | 3.86   |
| 0                                                 | 2.86   | 4.13   | 3.71   |
| 0                                                 | 2.43   | 4.63   | 4.57   |
|                                                   | 2.71   | 3.63   | 4.43   |
|                                                   | 3.00   | 3.63   | 4.86   |
|                                                   | 2.33   | 4.13   | 4.43   |
|                                                   | 3.14   | 3.25   | 3.71   |
|                                                   | 3.14   | 4.75   | 2.86   |
| 0                                                 | 2.86   | 3.63   | 3.57   |
| 0                                                 | 2.29   | 3.63   | 3.57   |
|                                                   | 3.71   | 3.00   | 3.71   |
| 0                                                 | 3.57   | 4.13   | 4.71   |
| minor diabetes                                    | 2.43   | 4.25   | 4.29   |
| 0                                                 | 3.57   | 3.63   | 3.14   |
| 0                                                 | 2.63   | 3.75   | 3.00   |
|                                                   | 3.43   | 3.50   | 3.43   |
| 0                                                 | 3.71   | 4.88   | 4.43   |
| Hypertension                                      | 3.29   | 4.63   | 3.67   |
|                                                   | 2.67   | 3.14   | 3.29   |
| 2006-2009 breast cancer                           | 3.43   | 4.13   | 3.29   |
| 0                                                 | 3.14   | 4.38   | 4.29   |
| אלרגיה. נחנק במקומות שמעוררים זאת. לא מטופל תרופח | 3.00   | 3.88   | 3.86   |
| Under activity of the thyroid gland               | 4.00   | 3.50   | 2.86   |

|                                                    |        |        |        |
|----------------------------------------------------|--------|--------|--------|
|                                                    | 3.29   | 4.00   | 3.14   |
| 0                                                  | 4.29   | 3.00   | 3.71   |
| Diabetes, Hypertension, Cholesterol, Triglycerides | 3.86   | 4.63   | 4.43   |
| hypertension, Hiatal hernia, reflux                | 3.00   | 3.88   | 3.00   |
|                                                    | 3.86   | 3.13   | 4.00   |
| Cholesterol                                        | 3.57   | 2.88   | 4.14   |
|                                                    | 2.71   | 3.75   | 4.43   |
| Thyoid gland                                       | 4.71   | 3.88   | 3.57   |
| 0                                                  | 1.86   | 3.13   | 4.86   |
| 0                                                  | 3.86   | 4.00   | 4.33   |
| 0                                                  | 2.14   | 4.63   | 3.71   |
| Leukemia                                           | 2.29   | 4.75   | 4.14   |
| 0                                                  | 3.86   | 4.50   | 3.57   |
|                                                    | 4.43   | 4.25   | 3.43   |
|                                                    | 2.57   | 3.63   | 2.29   |
|                                                    | 1.14   | 3.63   | 1.86   |
|                                                    | 3.29   | 3.50   | 3.57   |
| 0                                                  | 2.71   | 3.63   | 5.00   |
|                                                    | 2.57   | 4.63   | 5.00   |
|                                                    | 4.43   | 3.25   | 4.00   |
| 0                                                  | 3.71   | 4.63   | 4.43   |
|                                                    | 4.29   | 4.00   | 4.29   |
| 0                                                  | 3.43   | 4.25   | 5.00   |
|                                                    | 3.57   | 4.13   | 3.43   |
|                                                    | 3.14   | 4.38   | 4.14   |
|                                                    | 4.00   | 4.63   | 4.00   |
|                                                    | 3.71   | 4.38   | 3.00   |
| hypertention, high colesterole,Hyperglycemia       | 3.43   | 4.25   | 3.71   |
| 0                                                  | 3.57   | 3.75   | 4.00   |
| Colitis, Hypertension, Cholesterol                 | 3.00   | 3.63   | 4.29   |
| 0                                                  | 3.71   | 3.63   | 4.57   |
|                                                    | 3.71   | 3.25   | 3.43   |
| eye problems                                       | 2.14   | 2.88   | 3.71   |
|                                                    | 4.14   | 5.00   | 4.86   |
| 0                                                  | 2.57   | 4.13   | 3.00   |
| 0                                                  | 2.71   | 3.88   | 3.00   |
|                                                    | 3.14   | 4.50   | 3.43   |
| 0                                                  | 3.29   | 4.14   | 4.00   |
| 0                                                  | 1.25   | 3.38   | 4.14   |
|                                                    | 2.43   | 4.25   | 2.57   |
|                                                    | #NULL! | #NULL! | #NULL! |
| Osteoporosis                                       | 3.00   | 4.00   | 3.29   |
|                                                    | 1.86   | 3.88   | 3.00   |
| Sinusitis                                          | 2.71   | 4.38   | 3.86   |
| Cholesterol                                        | 3.71   | 2.88   | 3.43   |
|                                                    | 4.00   | 3.00   | 5.00   |
|                                                    | 4.43   | 5.00   | 3.57   |
| 0                                                  | 3.50   | 4.43   | 4.43   |
|                                                    | 3.71   | 4.13   | 4.43   |
| Hypertension                                       | 2.86   | 3.88   | 3.57   |
|                                                    | 3.25   | 3.50   | 4.14   |
|                                                    | 3.71   | 3.75   | 4.00   |
|                                                    | 3.29   | 4.13   | 4.00   |
| hypertention, Diabetes mellitus                    | 3.29   | 3.88   | 3.14   |
|                                                    | 4.00   | 4.00   | 4.71   |
|                                                    | 3.43   | 3.25   | 4.29   |

|                                                    |        |        |        |
|----------------------------------------------------|--------|--------|--------|
| Hypertension, Hypothyroidism,Liver dysfunction     | 3.14   | 3.88   | 3.86   |
|                                                    | 3.86   | 3.88   | 3.43   |
| 0                                                  | 2.29   | 3.88   | 3.43   |
|                                                    | 3.43   | 3.75   | 4.29   |
| diabetes, hyperlipidemia                           | 2.57   | 3.25   | 3.86   |
| Osteoporosis, Bloos pressure, cholestrol           | 2.86   | 3.38   | 5.00   |
| בעיה בשסתום המיטרלי                                | 3.86   | 4.63   | 4.86   |
|                                                    | 3.14   | 4.63   | 5.00   |
| 0                                                  | 3.14   | 3.75   | 3.14   |
|                                                    | 2.86   | 3.38   | 3.29   |
| 0                                                  | 4.14   | 3.13   | 4.57   |
|                                                    | 3.14   | 3.25   | 4.57   |
|                                                    | #NULL! | #NULL! | #NULL! |
|                                                    | 2.14   | 4.25   | 4.14   |
| 0                                                  | 2.86   | 3.25   | 3.43   |
| hypertension, Prostate dysfunction, sleeping probl | 2.71   | 3.38   | 4.67   |
| 0                                                  | 3.43   | 4.13   | 3.71   |
| Gout                                               | 2.71   | 3.75   | 4.14   |
|                                                    | 3.71   | 3.88   | 4.43   |
|                                                    | 3.29   | 4.25   | 4.29   |
| 0                                                  | 4.86   | 4.75   | 3.00   |
| 0                                                  | 3.71   | 4.50   | 4.86   |
| colesterol. osteoporosis                           | 3.86   | 3.25   | 3.00   |
|                                                    | 3.57   | 3.63   | 4.17   |
| Hypothyroidism                                     | 2.86   | 4.38   | 3.43   |
| Cholesterol                                        | 1.71   | 3.88   | 4.29   |
| Cholesterol                                        | 2.57   | 3.13   | 4.29   |
| Cholesterol, hypertension                          | 3.57   | 4.38   | 4.43   |
| בעיה בפרקי ירכיים                                  | 2.71   | 4.13   | 4.14   |
| colesterol, hypertension, Joint problem            | 3.86   | 3.63   | 2.43   |
| colesterol                                         | 2.14   | 3.25   | 4.00   |
|                                                    | 3.71   | 2.25   | 3.86   |
| colesterol                                         | 4.00   | 3.75   | 4.29   |
|                                                    | 2.20   | 5.00   | 4.80   |
| 0                                                  | 3.14   | 3.50   | 4.57   |
|                                                    | #NULL! | #NULL! | #NULL! |
|                                                    | 2.43   | 4.00   | 4.14   |
| 0                                                  | 4.43   | 3.63   | 3.86   |
| 0                                                  | 3.43   | 4.50   | 3.86   |
| 0                                                  | 3.43   | 4.13   | 3.14   |
|                                                    | 3.14   | 4.13   | 4.57   |
| 0                                                  | 1.88   | 4.38   | 2.71   |
|                                                    | 3.57   | 3.75   | 4.29   |
| Osteoporosis                                       | 3.29   | 3.88   | 3.71   |
| hypertention                                       | 3.57   | 4.00   | 4.29   |
|                                                    | #NULL! | #NULL! | #NULL! |
|                                                    | 2.71   | 3.75   | 4.00   |
| 0                                                  | 2.57   | 4.38   | 3.71   |
| 0                                                  | 2.43   | 4.38   | 3.57   |
| hypertention,Thyroid Problem                       | 3.43   | 3.63   | 4.71   |
| hypertention                                       | 3.88   | 4.38   | 2.43   |
| Osteoporosis,Cuvier colitis                        | 4.00   | 3.63   | 2.86   |
|                                                    | 2.57   | 3.63   | 3.14   |
| 0                                                  | 3.29   | 3.88   | 2.86   |
| schizophrenia                                      | 2.00   | 3.63   | 2.86   |
| 0                                                  | 2.57   | 4.88   | 4.86   |

|                         |        |        |        |
|-------------------------|--------|--------|--------|
| 0                       | 3.86   | 3.13   | 5.00   |
| Diabetes, Hypertention  | 3.57   | 4.38   | 3.83   |
| Cholesterol             | 3.43   | 4.13   | 4.71   |
|                         | 3.57   | 3.88   | 4.43   |
|                         | #NULL! | #NULL! | #NULL! |
|                         | 4.14   | 4.00   | 3.43   |
| Cardiac catheterization | 4.14   | 3.38   | 4.33   |
|                         | 3.43   | 4.00   | 2.71   |
|                         | 3.57   | 3.75   | 3.29   |
|                         | 3.57   | 3.88   | 4.57   |
| 0                       | 2.86   | 3.38   | 4.71   |
| hypertention            | 3.71   | 4.13   | 4.86   |
| 0                       | 3.71   | 4.25   | 4.86   |
|                         | 3.67   | 3.71   | 3.33   |
|                         | #NULL! | #NULL! | #NULL! |
|                         | #NULL! | #NULL! | #NULL! |
|                         | 3.00   | 2.71   | 2.71   |
|                         | 4.14   | 4.00   | 3.00   |

| neuroticism_P3 | openess_P3 | ds_soc_P3 | ds_neg_P3 | typed_P3 | Positivity_P3 | Tas_identify_P3 |
|----------------|------------|-----------|-----------|----------|---------------|-----------------|
| 4.50           | 1.78       | 20.00     | 10.00     | 1.00     | 3.75          | 0.00            |
| 4.88           | 4.44       | 1.00      | 17.00     | 0.00     | 4.25          | 2.43            |
| 2.75           | 4.00       | 13.00     | 8.00      | 0.00     | 3.88          | 1.00            |
| 3.00           | 4.22       | 8.00      | 6.00      | 0.00     | 4.13          | 1.10            |
| 1.63           | 2.78       | 10.00     | 7.00      | 0.00     | 4.63          | #NULL!          |
| 1.50           | 3.67       | 3.00      | 0.00      | 0.00     | 5.00          | 0.00            |
| 1.50           | 3.56       | 2.00      | 7.00      | 0.00     | 3.75          | 0.00            |
| 1.75           | 3.67       | 7.00      | 5.00      | 0.00     | 4.13          | 0.29            |
| 2.38           | 4.33       | 6.00      | 10.00     | 0.00     | 3.88          | 0.86            |
| 1.00           | 4.00       | 4.00      | 1.00      | 0.00     | 4.88          | 1.65            |
| 2.63           | 3.50       | 11.00     | 4.00      | 0.00     | 3.63          | 0.43            |
| 2.63           | 3.67       | 8.00      | 5.00      | 0.00     | 3.25          | 1.00            |
| 2.00           | 4.00       | 4.00      | 5.00      | 0.00     | 4.50          | 0.43            |
| 2.13           | 3.78       | 0.00      | 4.00      | 0.00     | 4.00          | 1.65            |
| 2.25           | 3.67       | 16.00     | 13.00     | 1.00     | 3.88          | 1.00            |
| 2.50           | 3.22       | 3.00      | 4.00      | 0.00     | 3.75          | #NULL!          |
| 2.25           | 4.33       | 9.00      | 3.00      | 0.00     | 4.00          | 1.14            |
| 3.38           | 2.33       | 20.00     | 0.00      | 0.00     | 3.00          | 0.00            |
| 3.00           | 4.00       | 15.00     | 16.00     | 1.00     | 3.00          | 2.00            |
| 2.00           | 3.78       | 25.00     | 6.00      | 0.00     | 4.13          | 1.57            |
| 1.63           | 3.22       | 2.00      | 3.00      | 0.00     | 4.25          | 0.29            |
| 1.63           | 4.56       | 3.00      | 0.00      | 0.00     | 3.29          | 0.29            |
| 1.50           | 3.67       | 6.00      | 0.00      | 0.00     | 3.88          | 0.14            |
| 2.63           | 3.56       | 12.00     | 9.00      | 0.00     | 3.63          | 1.57            |
| 2.63           | 3.56       | 8.00      | 12.00     | 0.00     | 3.63          | 1.29            |
| 3.13           | 4.00       | 1.00      | 4.00      | 0.00     | 3.38          | 0.86            |
| 3.38           | 4.11       | 0.00      | 20.00     | 0.00     | 3.63          | 1.29            |
| 1.63           | 4.56       | 11.00     | 6.00      | 0.00     | 4.00          | 0.57            |
| 3.00           | 4.11       | 7.00      | 9.00      | 0.00     | 4.00          | 0.43            |
| 2.75           | 3.89       | 6.00      | 9.00      | 0.00     | 3.75          | 0.00            |
| 2.25           | 3.56       | 9.00      | 8.00      | 0.00     | 3.50          | 0.86            |
| 2.13           | 3.44       | 5.00      | 2.00      | 0.00     | 3.63          | 0.14            |
| 3.50           | 3.25       | 14.00     | 15.00     | 1.00     | 2.63          | 0.71            |
| 1.88           | 2.11       | 13.00     | 7.00      | 0.00     | 3.88          | 1.00            |
| 2.75           | 4.33       | 7.00      | 6.00      | 0.00     | 3.63          | #NULL!          |
| 1.88           | 4.33       | 9.00      | 2.00      | 0.00     | 4.25          | #NULL!          |
| 3.13           | 1.56       | 21.00     | 19.00     | 1.00     | 2.75          | #NULL!          |
| 2.25           | 4.00       | 9.00      | 6.00      | 0.00     | 3.38          | #NULL!          |
| 2.50           | 3.33       | 9.00      | 3.00      | 0.00     | 3.25          | 0.29            |
| 1.38           | 4.67       | 7.00      | 9.00      | 0.00     | 3.88          | 0.71            |
| 2.25           | 4.29       | 0.00      | 4.00      | 0.00     | 3.29          | 2.00            |
| 2.25           | 4.22       | 4.00      | 6.00      | 0.00     | 3.88          | 0.71            |
| 3.75           | 3.22       | 4.00      | 12.00     | 0.00     | 7.13          | 1.43            |
| 2.50           | 2.78       | 0.00      | 10.00     | 0.00     | 3.75          | #NULL!          |
| 3.13           | 4.89       | 0.00      | 6.00      | 0.00     | 4.00          | 1.85            |
| 1.63           | 3.11       | 1.00      | 3.00      | 0.00     | 4.25          | 0.29            |
| 2.00           | 4.22       | 3.00      | 2.00      | 0.00     | 4.50          | 0.00            |
| 2.38           | 3.67       | 14.00     | 14.00     | 1.00     | 4.00          | #NULL!          |
| 3.25           | 4.11       | 14.00     | 16.00     | 1.00     | 4.75          | 0.14            |
| 1.50           | 4.44       | 3.00      | 4.00      | 0.00     | 4.75          | 0.00            |
| 2.00           | 4.44       | 6.00      | 5.00      | 0.00     | 4.13          | 0.71            |
| 2.00           | 3.11       | 1.00      | 10.00     | 0.00     | 3.38          | #NULL!          |
| 2.50           | 3.89       | 0.00      | 7.00      | 0.00     | 3.38          | 0.86            |
| 2.63           | 4.78       | 7.00      | 11.00     | 0.00     | 3.88          | 1.14            |
| #NULL!         | #NULL!     | 12.00     | 13.00     | 1.00     | #NULL!        | #NULL!          |

|        |        |        |        |        |        |        |
|--------|--------|--------|--------|--------|--------|--------|
| 2.88   | 3.56   | 17.00  | 4.00   | 0.00   | 3.88   | 0.43   |
| 2.38   | 4.00   | 7.00   | 4.00   | 0.00   | 4.00   | 0.43   |
| 1.63   | 4.22   | 0.00   | 3.00   | 0.00   | 4.00   | 0.00   |
| 3.50   | 3.44   | 10.00  | 14.00  | 1.00   | 3.88   | 0.00   |
| 3.13   | 4.56   | 5.00   | 7.00   | 0.00   | 4.38   | 0.71   |
| 2.63   | 3.78   | 2.00   | 9.00   | 0.00   | 3.88   | #NULL! |
| 1.13   | 3.89   | 24.00  | 1.00   | 0.00   | 3.75   | 0.00   |
| 2.13   | 4.00   | 0.00   | 6.00   | 0.00   | 3.75   | 0.14   |
| 2.00   | 4.44   | 9.00   | 17.00  | 0.00   | 3.50   | 2.14   |
| 4.00   | 3.11   | 16.00  | 14.00  | 1.00   | 3.00   | 1.71   |
| 2.13   | 3.22   | 0.00   | 4.00   | 0.00   | 4.13   | 0.14   |
| 4.00   | 3.22   | 6.00   | 16.00  | 0.00   | 3.88   | 0.43   |
| 4.00   | 2.33   | 1.00   | 8.00   | 0.00   | 3.25   | 0.14   |
| 2.13   | 3.22   | 17.00  | 7.00   | 0.00   | 3.50   | 1.29   |
| 3.25   | 3.44   | 22.00  | 16.00  | 1.00   | 3.63   | 1.14   |
| 2.88   | 3.44   | 10.00  | 4.00   | 0.00   | 3.38   | 0.71   |
| 1.50   | 3.67   | 15.00  | 3.00   | 0.00   | 4.25   | 0.43   |
| 1.13   | 4.33   | 13.00  | 2.00   | 0.00   | 3.88   | 1.00   |
| 3.13   | 3.78   | 6.00   | 16.00  | 0.00   | 4.00   | 1.00   |
| 1.88   | 2.78   | 12.00  | 7.00   | 0.00   | 3.88   | 0.71   |
| 2.13   | 2.89   | 10.00  | 2.00   | 0.00   | 4.50   | 0.00   |
| 1.63   | 4.22   | 3.00   | 5.00   | 0.00   | 3.75   | 0.57   |
| 2.88   | 4.11   | 13.00  | 13.00  | 1.00   | 4.00   | #NULL! |
| 1.75   | 3.75   | 28.00  | 8.00   | 0.00   | 2.88   | 0.43   |
| 3.50   | 2.56   | 21.00  | 10.00  | 1.00   | 3.13   | 0.57   |
| 2.25   | 4.11   | 6.00   | 5.00   | 0.00   | 4.25   | 1.29   |
| 2.75   | 3.67   | 13.00  | 7.00   | 0.00   | 3.88   | 0.86   |
| 1.38   | 4.75   | 5.00   | 1.00   | 0.00   | 4.38   | 0.57   |
| 3.00   | 3.78   | 15.00  | 10.00  | 1.00   | 3.63   | 1.00   |
| 1.63   | 4.56   | 20.00  | 3.00   | 0.00   | 4.38   | 1.14   |
| 1.00   | 3.78   | 0.00   | 1.00   | 0.00   | 4.63   | 0.00   |
| 2.63   | 3.78   | 20.00  | 8.00   | 0.00   | 3.38   | 0.71   |
| 5.00   | 3.89   | 2.00   | 19.00  | 0.00   | 2.63   | 0.00   |
| 2.38   | 4.11   | 5.00   | 3.00   | 0.00   | 3.88   | 1.43   |
| 1.75   | 3.89   | 0.00   | 2.00   | 0.00   | 4.88   | 0.14   |
| 2.13   | 4.67   | 3.00   | 3.00   | 0.00   | 4.50   | 1.30   |
| 2.63   | 3.89   | 9.00   | 13.00  | 0.00   | 3.13   | 1.00   |
| 3.38   | 3.56   | 7.00   | 16.00  | 0.00   | 3.13   | 2.30   |
| 4.75   | 2.44   | 25.00  | 25.00  | 1.00   | 1.50   | #NULL! |
| 2.25   | 2.67   | 13.00  | 0.00   | 0.00   | 3.63   | 1.00   |
| 3.25   | 4.00   | 5.00   | 9.00   | 0.00   | 3.63   | 1.29   |
| 1.38   | 3.11   | 6.00   | 5.00   | 0.00   | 3.63   | 1.00   |
| 2.25   | 4.00   | 26.00  | 6.00   | 0.00   | 4.38   | 0.43   |
| 3.38   | 4.00   | 2.00   | 8.00   | 0.00   | #NULL! | 1.00   |
| 2.50   | 3.11   | 14.00  | 8.00   | 0.00   | 3.25   | 1.86   |
| 3.63   | 3.78   | 20.00  | 16.00  | 1.00   | 3.50   | 0.71   |
| 2.75   | 3.78   | 17.00  | 12.00  | 1.00   | 3.38   | 1.43   |
| 2.25   | 3.56   | 11.00  | 12.00  | 1.00   | 3.50   | 1.29   |
| 2.75   | 3.67   | 0.00   | 1.00   | 0.00   | 4.13   | 1.30   |
| 2.88   | 2.89   | 9.00   | 10.00  | 0.00   | 3.75   | 1.14   |
| 1.75   | 3.89   | 9.00   | 0.00   | 0.00   | 3.63   | #NULL! |
| 1.00   | 4.11   | 4.00   | 1.00   | 0.00   | 4.13   | 0.00   |
| 2.88   | 3.56   | 3.00   | 8.00   | 0.00   | 3.38   | 1.29   |
| 2.88   | 4.44   | 12.00  | 11.00  | 1.00   | 3.75   | 1.14   |
| #NULL! | #NULL! | #NULL! | #NULL! | #NULL! | #NULL! | #NULL! |
| 2.50   | 3.11   | 16.00  | 10.00  | 1.00   | 3.13   | 0.57   |



|        |        |       |       |      |        |        |
|--------|--------|-------|-------|------|--------|--------|
| 2.75   | 4.11   | 4.00  | 20.00 | 0.00 | 4.57   | 0.71   |
| 1.38   | 3.67   | 9.00  | 3.00  | 0.00 | 3.63   | 1.14   |
| 3.38   | 3.33   | 14.00 | 15.00 | 1.00 | 3.63   | 0.14   |
| 2.25   | 3.33   | 21.00 | 9.00  | 0.00 | 3.38   | #NULL! |
| 2.50   | 3.33   | 4.00  | 2.00  | 0.00 | 3.63   | 1.00   |
| 2.00   | 3.44   | 11.00 | 3.00  | 0.00 | 3.75   | 0.43   |
| 2.88   | 3.44   | 12.00 | 7.00  | 0.00 | 4.00   | 1.14   |
| 2.13   | 4.44   | 1.00  | 5.00  | 0.00 | 4.75   | 0.14   |
| #NULL! | #NULL! | 7.00  | 3.00  | 0.00 | #NULL! | #NULL! |
| 2.50   | 4.00   | 19.00 | 17.00 | 1.00 | 3.63   | 1.29   |
| 1.63   | 4.44   | 7.00  | 4.00  | 0.00 | 4.00   | 0.00   |
| 3.88   | 3.78   | 9.00  | 10.00 | 0.00 | 3.75   | 0.00   |
| 2.00   | 3.11   | 8.00  | 4.00  | 0.00 | 4.00   | 0.71   |
| 2.75   | 3.89   | 0.00  | 3.00  | 0.00 | 3.50   | 1.00   |
| 2.38   | 4.38   | 8.00  | 3.00  | 0.00 | 4.00   | 0.00   |
| 3.50   | 3.67   | 18.00 | 18.00 | 1.00 | 3.50   | #NULL! |
| 2.00   | 4.11   | 0.00  | 7.00  | 0.00 | 4.13   | 0.43   |
| 2.00   | 3.56   | 0.00  | 5.00  | 0.00 | 3.75   | #NULL! |
| 2.00   | 4.11   | 12.00 | 4.00  | 0.00 | 4.88   | 0.14   |
| 3.50   | 3.78   | 10.00 | 12.00 | 1.00 | 3.50   | 1.71   |
| 2.13   | 4.11   | 10.00 | 12.00 | 1.00 | 3.50   | #NULL! |
| 2.75   | 3.56   | 14.00 | 10.00 | 1.00 | 3.50   | 0.14   |
| 4.00   | 4.11   | 20.00 | 16.00 | 1.00 | 2.88   | #NULL! |
| 4.25   | 2.89   | 7.00  | 5.00  | 0.00 | 4.00   | 1.57   |
| 2.75   | 3.78   | 20.00 | 2.00  | 0.00 | 4.43   | 1.57   |
| 3.88   | 3.78   | 21.00 | 18.00 | 1.00 | 2.75   | 1.14   |
| 1.71   | 4.67   | 4.00  | 9.00  | 0.00 | 4.63   | 1.43   |
| 3.00   | 4.11   | 6.00  | 6.00  | 0.00 | 3.88   | 0.57   |
| 1.13   | 3.89   | 11.00 | 0.00  | 0.00 | 4.50   | #NULL! |
| 3.75   | 3.78   | 13.00 | 23.00 | 1.00 | 1.75   | #NULL! |
| 3.13   | 3.56   | 8.00  | 14.00 | 0.00 | 2.71   | #NULL! |
| 2.25   | 3.22   | 2.00  | 4.00  | 0.00 | 5.00   | 0.57   |
| 2.50   | 3.50   | 7.00  | 13.00 | 0.00 | 3.88   | 1.83   |
| 2.25   | 3.22   | 16.00 | 11.00 | 1.00 | 3.50   | 1.00   |
| 2.38   | 2.89   | 10.00 | 15.00 | 1.00 | 3.50   | 1.71   |
| 2.00   | 4.11   | 18.00 | 1.00  | 0.00 | 4.38   | 0.00   |
| 2.63   | 3.00   | 4.00  | 5.00  | 0.00 | 4.50   | #NULL! |
| 2.88   | 3.44   | 11.00 | 12.00 | 1.00 | 3.75   | 0.71   |
| 3.00   | 3.22   | 20.00 | 8.00  | 0.00 | 3.13   | 1.29   |
| 2.50   | 3.33   | 10.00 | 11.00 | 1.00 | 3.88   | #NULL! |
| 2.50   | 3.44   | 3.00  | 8.00  | 0.00 | 4.00   | 2.57   |
| 4.13   | 3.78   | 15.00 | 22.00 | 1.00 | 2.88   | 1.71   |
| 3.38   | 4.11   | 13.00 | 18.00 | 1.00 | 3.00   | 1.86   |
| 3.38   | 3.11   | 6.00  | 8.00  | 0.00 | 3.50   | 1.14   |
| 2.25   | 4.56   | 4.00  | 4.00  | 0.00 | 4.00   | 0.86   |
| 3.13   | 3.11   | 7.00  | 7.00  | 0.00 | 3.50   | 0.00   |
| 4.38   | 4.33   | 9.00  | 22.00 | 0.00 | 2.13   | 2.05   |
| 2.38   | 3.78   | 10.00 | 7.00  | 0.00 | 3.38   | 0.86   |
| 2.75   | 3.44   | 8.00  | 10.00 | 0.00 | 3.63   | 0.71   |
| 1.25   | 4.56   | 0.00  | 6.00  | 0.00 | 4.88   | 1.29   |
| 1.25   | 3.67   | 4.00  | 3.00  | 0.00 | 4.50   | 0.29   |
| 3.25   | 3.00   | 10.00 | 8.00  | 0.00 | 3.00   | #NULL! |
| 2.38   | 4.11   | 1.00  | 7.00  | 0.00 | 3.88   | 0.43   |
| 2.00   | 3.89   | 10.00 | 4.00  | 0.00 | 4.00   | 0.57   |
| 3.13   | 4.22   | 7.00  | 14.00 | 0.00 | 3.38   | 1.43   |
| 4.25   | 4.78   | 9.00  | 13.00 | 0.00 | 3.13   | 1.57   |

|        |        |       |       |      |        |        |
|--------|--------|-------|-------|------|--------|--------|
| 3.13   | 4.00   | 7.00  | 14.00 | 0.00 | 3.38   | 1.65   |
| 2.63   | 4.67   | 0.00  | 9.00  | 0.00 | 4.38   | 0.00   |
| 1.50   | 4.44   | 0.00  | 2.00  | 0.00 | 4.75   | 0.71   |
| 3.88   | 4.75   | 18.00 | 19.00 | 1.00 | 3.25   | 0.57   |
| 4.13   | 3.78   | 7.00  | 23.00 | 0.00 | 2.25   | #NULL! |
| 2.00   | 4.89   | 7.00  | 4.00  | 0.00 | 3.75   | 0.14   |
| 2.50   | 4.00   | 7.00  | 5.00  | 0.00 | 3.50   | 1.29   |
| 2.38   | 4.67   | 1.00  | 12.00 | 0.00 | 3.63   | 0.00   |
| 2.75   | 2.44   | 16.00 | 13.00 | 1.00 | 3.00   | 1.43   |
| 3.38   | 2.78   | 3.00  | 17.00 | 0.00 | 3.50   | 2.43   |
| 1.88   | 2.11   | 20.00 | 7.00  | 0.00 | 3.88   | 2.14   |
| 2.75   | 2.78   | 15.00 | 10.00 | 1.00 | 2.25   | 0.00   |
| 4.13   | 3.67   | 6.00  | 9.00  | 0.00 | 4.38   | 1.14   |
| 4.00   | 4.11   | 7.00  | 12.00 | 0.00 | 3.63   | 2.00   |
| 2.75   | 2.89   | 19.00 | 18.00 | 1.00 | 3.38   | 1.71   |
| 1.63   | 2.78   | 27.00 | 8.00  | 0.00 | 3.75   | #NULL! |
| 2.63   | 3.67   | 14.00 | 15.00 | 1.00 | 3.25   | 1.43   |
| 3.25   | 4.44   | 9.00  | 15.00 | 0.00 | 3.88   | 0.57   |
| 2.63   | 3.89   | 13.00 | 8.00  | 0.00 | 2.88   | 1.86   |
| 1.75   | 5.00   | 0.00  | 4.00  | 0.00 | 3.75   | #NULL! |
| 1.75   | 4.78   | 2.00  | 5.00  | 0.00 | 4.00   | 0.29   |
| 1.38   | 4.11   | 5.00  | 11.00 | 0.00 | 4.00   | #NULL! |
| 1.13   | 4.44   | 0.00  | 1.00  | 0.00 | 4.00   | 0.43   |
| 2.38   | 3.56   | 7.00  | 8.00  | 0.00 | 4.00   | 0.57   |
| 1.38   | 3.56   | 1.00  | 6.00  | 0.00 | 4.38   | 0.57   |
| 2.13   | 4.78   | 5.00  | 5.00  | 0.00 | 4.38   | 0.71   |
| 2.38   | 2.89   | 7.00  | 8.00  | 0.00 | 3.50   | 2.14   |
| 2.13   | 3.00   | 0.00  | 2.00  | 0.00 | 4.00   | 0.00   |
| 3.00   | 3.44   | 10.00 | 7.00  | 0.00 | 3.63   | 1.43   |
| 2.25   | 4.22   | 6.00  | 16.00 | 0.00 | 3.63   | 1.43   |
| 2.63   | 4.22   | 3.00  | 13.00 | 0.00 | 4.00   | 1.14   |
| 3.75   | 4.33   | 16.00 | 24.00 | 1.00 | 3.75   | #NULL! |
| 2.38   | 3.22   | 22.00 | 22.00 | 1.00 | 2.38   | 2.43   |
| 1.38   | 4.44   | 2.00  | 3.00  | 0.00 | 4.75   | #NULL! |
| 3.25   | 4.11   | 11.00 | 16.00 | 1.00 | 2.88   | 1.57   |
| 3.75   | 4.44   | 12.00 | 9.00  | 0.00 | 3.63   | 1.14   |
| 2.88   | 4.22   | 12.00 | 3.00  | 0.00 | 3.63   | #NULL! |
| 3.00   | 3.33   | 15.00 | 18.00 | 1.00 | 3.00   | 2.00   |
| 3.25   | 3.00   | 28.00 | 18.00 | 1.00 | 2.50   | 2.29   |
| 3.00   | 4.11   | 8.00  | 11.00 | 0.00 | 3.00   | 0.57   |
| #NULL! | #NULL! | 8.00  | 8.00  | 0.00 | #NULL! | #NULL! |
| 2.38   | 3.11   | 5.00  | 3.00  | 0.00 | 3.63   | 1.29   |
| 2.75   | 2.33   | 23.00 | 14.00 | 1.00 | 2.88   | 0.29   |
| 1.25   | 4.11   | 13.00 | 5.00  | 0.00 | 4.86   | 1.05   |
| 2.25   | 4.67   | 6.00  | 7.00  | 0.00 | 3.13   | #NULL! |
| 3.00   | #NULL! | 11.00 | 16.00 | 1.00 | 3.38   | #NULL! |
| 2.00   | 4.89   | 2.00  | 3.00  | 0.00 | 4.38   | 0.00   |
| 3.38   | 2.38   | 7.00  | 2.00  | 0.00 | 3.13   | 0.29   |
| 1.38   | 4.22   | 1.00  | 5.00  | 0.00 | 3.75   | 0.86   |
| 3.50   | 4.33   | 9.00  | 20.00 | 0.00 | 3.38   | #NULL! |
| 2.88   | 3.67   | 3.00  | 13.00 | 0.00 | 4.13   | 0.57   |
| 3.00   | 3.78   | 4.00  | 15.00 | 0.00 | 3.75   | 1.14   |
| 2.13   | 3.33   | 6.00  | 10.00 | 0.00 | 4.13   | 1.14   |
| 2.86   | 3.78   | 8.00  | 12.00 | 0.00 | 2.14   | 1.71   |
| 2.13   | 3.67   | 4.00  | 2.00  | 0.00 | 4.50   | #NULL! |
| 1.75   | 3.56   | 6.00  | 7.00  | 0.00 | 3.13   | 1.00   |

|        |        |       |       |      |        |        |
|--------|--------|-------|-------|------|--------|--------|
| 3.38   | 3.50   | 15.00 | 16.00 | 1.00 | 3.50   | 1.14   |
| 3.00   | 3.78   | 1.00  | 10.00 | 0.00 | 3.75   | 1.43   |
| 2.63   | 3.33   | 17.00 | 8.00  | 0.00 | 3.00   | 0.86   |
| 3.00   | 3.89   | 9.00  | 11.00 | 0.00 | 3.71   | 2.57   |
| 3.38   | 2.56   | 16.00 | 19.00 | 1.00 | 3.25   | 1.29   |
| 3.13   | 4.78   | 16.00 | 9.00  | 0.00 | 3.75   | 0.57   |
| 1.00   | 3.78   | 4.00  | 2.00  | 0.00 | 4.63   | 0.57   |
| 1.88   | 3.89   | 8.00  | 2.00  | 0.00 | 3.88   | #NULL! |
| 2.63   | 4.33   | 5.00  | 9.00  | 0.00 | 3.50   | 1.29   |
| 3.25   | 3.33   | 7.00  | 9.00  | 0.00 | 3.50   | 1.86   |
| 3.63   | 3.89   | 0.00  | 12.00 | 0.00 | 3.63   | 0.43   |
| 2.50   | 2.89   | 16.00 | 3.00  | 0.00 | 3.63   | #NULL! |
| #NULL! | #NULL! | 13.00 | 5.00  | 0.00 | #NULL! | #NULL! |
| 4.13   | 4.00   | 20.00 | 22.00 | 1.00 | 3.00   | 1.57   |
| 2.75   | 3.00   | 13.00 | 13.00 | 1.00 | 3.63   | 1.57   |
| 2.29   | 4.11   | 14.00 | 11.00 | 1.00 | 4.13   | 1.00   |
| 3.88   | 4.89   | 6.00  | 23.00 | 0.00 | 3.50   | 1.29   |
| 1.63   | 3.89   | 12.00 | 6.00  | 0.00 | 3.63   | 0.71   |
| 3.38   | 3.78   | 10.00 | 12.00 | 1.00 | 3.25   | 1.50   |
| 1.00   | 3.56   | 2.00  | 3.00  | 0.00 | 3.88   | 0.33   |
| 3.00   | 3.33   | 0.00  | 5.00  | 0.00 | 4.75   | 0.71   |
| 1.50   | 4.22   | 2.00  | 3.00  | 0.00 | 4.50   | 1.29   |
| 3.13   | 3.89   | 6.00  | 3.00  | 0.00 | 3.50   | 1.45   |
| 2.25   | 3.50   | 4.00  | 11.00 | 0.00 | 3.14   | 2.71   |
| 2.75   | 4.00   | 8.00  | 8.00  | 0.00 | 3.38   | 1.71   |
| 3.13   | 2.78   | 28.00 | 21.00 | 1.00 | 1.75   | 1.86   |
| 2.00   | 3.89   | 21.00 | 4.00  | 0.00 | 3.75   | 1.29   |
| 2.50   | 3.11   | 3.00  | 4.00  | 0.00 | 4.88   | 0.43   |
| 3.38   | 3.44   | 22.00 | 7.00  | 0.00 | 3.50   | 0.00   |
| 3.00   | 3.56   | 3.00  | 5.00  | 0.00 | 3.75   | 1.50   |
| 4.00   | 2.67   | 24.00 | 15.00 | 1.00 | 3.00   | 1.86   |
| 3.29   | 4.00   | 1.00  | 16.00 | 0.00 | 3.75   | 1.57   |
| 4.00   | 4.11   | 10.00 | 20.00 | 1.00 | 3.75   | 1.70   |
| 2.60   | 2.25   | 0.00  | 3.00  | 0.00 | 4.00   | 0.57   |
| 2.00   | 4.44   | 6.00  | 5.00  | 0.00 | 4.25   | 0.00   |
| #NULL! | #NULL! | 5.00  | 13.00 | 0.00 | #NULL! | #NULL! |
| 1.38   | 3.44   | 16.00 | 4.00  | 0.00 | 3.75   | 0.43   |
| 1.75   | 4.67   | 1.00  | 3.00  | 0.00 | 4.13   | 0.43   |
| 2.63   | 3.89   | 6.00  | 9.00  | 0.00 | 3.88   | 0.71   |
| 2.13   | 4.00   | 13.00 | 4.00  | 0.00 | 3.75   | 0.57   |
| 1.63   | 4.67   | 9.00  | 3.00  | 0.00 | 4.13   | 1.00   |
| 2.13   | 3.00   | 23.00 | 11.00 | 1.00 | 3.13   | 1.29   |
| 3.00   | 3.00   | 1.00  | 7.00  | 0.00 | 3.00   | 1.57   |
| 1.88   | 3.67   | 6.00  | 4.00  | 0.00 | 4.00   | #NULL! |
| 2.63   | 3.89   | 10.00 | 11.00 | 1.00 | 3.88   | 0.57   |
| #NULL! | #NULL! | 10.00 | 7.00  | 0.00 | #NULL! | #NULL! |
| 2.63   | 2.89   | 13.00 | 8.00  | 0.00 | 3.38   | 1.43   |
| 1.75   | 4.11   | 7.00  | 3.00  | 0.00 | 3.75   | 1.57   |
| 2.75   | 3.67   | 17.00 | 8.00  | 0.00 | 4.00   | 0.71   |
| 3.13   | 4.67   | 9.00  | 10.00 | 0.00 | 3.75   | 0.57   |
| 3.00   | 4.78   | 18.00 | 7.00  | 0.00 | 3.88   | 1.29   |
| 4.75   | 4.56   | 12.00 | 22.00 | 1.00 | 3.38   | 1.43   |
| 2.50   | 3.44   | 13.00 | 7.00  | 0.00 | 3.38   | 1.29   |
| 3.63   | 3.00   | 10.00 | 11.00 | 1.00 | 3.38   | #NULL! |
| 4.13   | 3.78   | 18.00 | 17.00 | 1.00 | 1.88   | 3.00   |
| 1.75   | 3.44   | 15.00 | 2.00  | 0.00 | 4.25   | 0.71   |

|        |        |        |        |        |        |        |
|--------|--------|--------|--------|--------|--------|--------|
| 2.50   | 4.78   | 3.00   | 3.00   | 0.00   | 4.00   | 0.43   |
| 2.25   | 4.33   | 2.00   | 9.00   | 0.00   | 3.88   | 1.14   |
| 1.88   | 4.22   | 4.00   | 3.00   | 0.00   | 3.88   | 0.00   |
| 2.13   | 3.56   | 2.00   | 4.00   | 0.00   | 3.88   | 0.14   |
| #NULL! | #NULL! | 15.00  | 9.00   | 0.00   | 3.88   | #NULL! |
| 2.13   | 3.89   | 2.00   | 6.00   | 0.00   | 3.88   | #NULL! |
| 1.75   | 4.00   | 0.00   | 4.00   | 0.00   | 5.00   | 0.00   |
| 4.50   | 3.56   | 6.00   | 22.00  | 0.00   | 2.75   | 1.71   |
| 4.75   | 4.56   | 3.00   | 24.00  | 0.00   | 2.50   | 1.14   |
| 1.25   | 2.56   | 14.00  | 14.00  | 1.00   | 3.75   | 0.00   |
| 3.25   | 2.78   | 13.00  | 12.00  | 1.00   | 3.88   | 0.29   |
| 2.57   | 3.78   | 4.00   | 0.00   | 0.00   | 4.00   | 1.00   |
| 1.00   | 4.33   | 4.00   | 3.00   | 0.00   | 4.13   | 0.71   |
| 2.29   | 4.44   | 7.00   | 7.00   | 0.00   | 4.00   | 2.00   |
| #NULL! | #NULL! | #NULL! | #NULL! | #NULL! | #NULL! | 0.14   |
| #NULL! | #NULL! | #NULL! | #NULL! | #NULL! | #NULL! | 1.00   |
| 3.00   | 2.78   | 21.00  | 28.00  | 1.00   | 3.63   | 3.50   |
| 3.13   | 3.67   | 1.00   | 8.00   | 0.00   | 3.88   | 1.65   |

| Tas_describe_P3 | Tas_external_P3 | Tas_total_P3 | NS_P3 | HA_P3 | RD_P3 | PS_P3 |
|-----------------|-----------------|--------------|-------|-------|-------|-------|
| 1.80            | 1.63            | 1.10         | 55.00 | 42.00 | 58.00 | 65.00 |
| 1.25            | 0.13            | 1.21         | 73.68 | 76.00 | 84.00 | 66.32 |
| 1.00            | 1.50            | 1.20         | 49.00 | 70.00 | 51.00 | 64.00 |
| 0.43            | 0.40            | 2.13         | 41.00 | 62.00 | 66.00 | 67.00 |
| #NULL!          | #NULL!          | #NULL!       | 36.00 | 45.00 | 45.26 | 65.00 |
| 0.00            | 1.86            | 0.68         | 46.00 | 34.00 | 79.00 | 85.00 |
| 1.40            | 1.88            | 1.10         | 56.00 | 51.00 | 68.00 | 66.00 |
| 0.80            | 1.50            | 0.90         | 50.00 | 42.00 | 64.00 | 95.00 |
| 0.80            | 2.13            | 1.35         | 62.00 | 51.00 | 76.00 | 69.00 |
| 1.00            | 2.00            | 2.00         | 57.00 | 48.00 | 65.00 | 67.00 |
| 0.60            | 0.75            | 0.60         | 52.00 | 51.00 | 70.53 | 58.00 |
| 1.00            | 1.38            | 1.15         | 64.00 | 55.00 | 69.00 | 61.05 |
| 0.60            | 0.75            | 0.60         | 55.00 | 51.00 | 80.00 | 67.00 |
| 0.86            | 1.20            | 2.63         | 56.00 | 34.00 | 56.00 | 75.00 |
| 1.40            | 1.75            | 1.40         | 49.00 | 55.00 | 54.00 | 67.00 |
| #NULL!          | #NULL!          | #NULL!       | 46.00 | 48.00 | 75.00 | 66.00 |
| 1.00            | 1.38            | 1.20         | 59.00 | 44.00 | 66.00 | 68.00 |
| 2.20            | 2.00            | 1.35         | 48.00 | 69.00 | 60.00 | 41.00 |
| 1.00            | 2.67            | 1.94         | 50.00 | 54.00 | 57.00 | 60.00 |
| 3.40            | 2.38            | 2.35         | 50.00 | 54.00 | 56.00 | 70.00 |
| 0.80            | 1.50            | 0.90         | 56.00 | 31.00 | 64.00 | 66.00 |
| 0.20            | 0.25            | 0.25         | 55.00 | 35.79 | 55.00 | 68.00 |
| 1.60            | 1.50            | 1.05         | 46.00 | 43.00 | 60.00 | 73.00 |
| 1.80            | 2.25            | 1.90         | 66.00 | 49.00 | 56.00 | 61.00 |
| 0.80            | 1.25            | 1.15         | 67.00 | 55.00 | 67.00 | 61.00 |
| 1.20            | 0.75            | 0.90         | 63.00 | 56.00 | 79.00 | 49.00 |
| 0.80            | 1.13            | 1.10         | 50.00 | 56.00 | 79.00 | 95.00 |
| 0.60            | 2.13            | 1.20         | 79.00 | 55.00 | 74.00 | 71.00 |
| 1.40            | 1.63            | 1.15         | 60.00 | 41.00 | 61.00 | 73.00 |
| 1.60            | 1.63            | 1.05         | 51.00 | 47.00 | 59.00 | 62.00 |
| 0.80            | 1.75            | 1.20         | 60.00 | 56.00 | 72.63 | 56.00 |
| 1.20            | 1.63            | 1.00         | 57.00 | 49.00 | 67.00 | 60.00 |
| 1.40            | 1.38            | 1.15         | 61.00 | 61.00 | 59.00 | 51.00 |
| 1.80            | 2.75            | 1.90         | 35.00 | 43.00 | 50.00 | 72.00 |
| #NULL!          | #NULL!          | #NULL!       | 49.00 | 47.00 | 81.00 | 68.00 |
| #NULL!          | #NULL!          | #NULL!       | 58.00 | 44.00 | 62.00 | 73.00 |
| #NULL!          | #NULL!          | #NULL!       | 43.00 | 87.00 | 75.00 | 38.00 |
| #NULL!          | #NULL!          | #NULL!       | 55.00 | 52.63 | 70.53 | 73.33 |
| 1.40            | 1.13            | 0.90         | 46.00 | 54.00 | 71.00 | 68.00 |
| 1.40            | 0.88            | 0.95         | 60.00 | 46.00 | 69.00 | 55.00 |
| 1.80            | 1.88            | 1.90         | 53.00 | 50.00 | 73.33 | 63.00 |
| 1.00            | 1.00            | 0.90         | 59.00 | 57.00 | 70.00 | 62.00 |
| 0.20            | 0.88            | 0.90         | 61.00 | 53.00 | 80.00 | 62.00 |
| #NULL!          | #NULL!          | #NULL!       | 54.00 | 50.00 | 82.00 | 63.00 |
| 2.00            | 1.20            | 2.13         | 69.00 | 46.00 | 77.00 | 67.00 |
| 0.40            | 1.75            | 0.90         | 50.00 | 35.00 | 71.58 | 81.00 |
| 0.20            | 0.25            | 0.15         | 55.00 | 51.00 | 71.00 | 64.00 |
| #NULL!          | #NULL!          | #NULL!       | 50.00 | 59.00 | 65.26 | 69.00 |
| 0.40            | 0.88            | 0.50         | 48.00 | 31.00 | 75.00 | 94.00 |
| 1.00            | 0.75            | 0.55         | 51.00 | 30.00 | 49.47 | 69.00 |
| 1.20            | 0.63            | 0.80         | 48.00 | 37.00 | 67.00 | 74.00 |
| #NULL!          | #NULL!          | #NULL!       | 70.00 | 57.89 | 73.00 | 51.00 |
| 0.80            | 0.25            | 0.60         | 55.00 | 55.00 | 80.00 | 60.00 |
| 0.40            | 0.38            | 0.65         | 55.00 | 53.00 | 70.00 | 77.00 |
| #NULL!          | #NULL!          | #NULL!       | 55.00 | 58.00 | 69.00 | 63.00 |

|        |        |        |        |        |        |        |
|--------|--------|--------|--------|--------|--------|--------|
| 2.00   | 2.13   | 1.50   | 46.00  | 63.00  | 66.00  | 62.00  |
| 2.40   | 1.00   | 1.15   | 62.00  | 46.00  | 65.26  | 83.00  |
| 0.80   | 1.00   | 0.60   | 59.00  | 53.00  | 69.00  | 60.00  |
| 1.40   | 1.00   | 0.75   | 55.00  | 59.00  | 74.00  | 83.00  |
| 0.60   | 1.25   | 0.90   | 55.00  | 54.00  | 65.00  | 73.00  |
| #NULL! | #NULL! | #NULL! | 55.00  | 54.00  | 71.00  | 72.00  |
| 1.80   | 2.25   | 1.35   | 38.00  | 54.00  | 36.00  | 65.00  |
| 0.20   | 1.13   | 0.55   | 56.00  | 57.00  | 65.00  | 69.00  |
| 1.60   | 1.50   | 1.75   | 54.00  | 57.00  | 61.00  | 53.00  |
| 1.80   | 2.38   | 2.00   | 54.00  | 72.00  | 54.00  | 58.00  |
| 0.40   | 2.50   | 1.15   | 67.00  | 31.00  | 83.00  | 69.00  |
| 1.20   | 1.88   | 1.20   | 47.00  | 73.00  | 72.63  | 63.16  |
| 0.60   | 0.50   | 0.40   | 58.00  | 66.00  | 69.00  | 51.00  |
| 2.00   | 2.00   | 1.75   | 53.00  | 57.00  | 56.00  | 61.00  |
| 1.60   | 1.38   | 1.35   | 54.00  | 71.00  | 53.00  | 57.00  |
| 0.60   | 0.63   | 0.65   | 62.00  | 61.00  | 77.00  | 53.00  |
| 1.20   | 1.88   | 1.20   | 60.00  | 46.00  | 60.00  | 75.00  |
| 1.00   | 1.25   | 1.10   | 49.00  | 47.00  | 55.00  | 67.00  |
| 1.00   | 2.00   | 1.44   | 60.00  | 57.00  | 78.00  | 62.00  |
| 1.60   | 1.63   | 1.30   | 54.00  | 50.53  | 64.21  | 61.11  |
| 0.00   | 2.00   | 0.80   | 60.00  | 51.00  | 74.00  | 57.00  |
| 2.60   | 1.25   | 1.35   | 49.00  | 51.00  | 63.00  | 64.00  |
| #NULL! | #NULL! | #NULL! | 59.00  | 57.00  | 76.00  | 83.00  |
| 1.60   | 2.75   | 1.65   | 58.00  | 55.00  | 50.00  | 65.26  |
| 1.60   | 0.75   | 0.90   | 50.00  | 72.00  | 64.00  | 62.00  |
| 0.80   | 1.75   | 1.35   | 55.00  | 43.00  | 78.00  | 58.00  |
| 1.60   | 1.75   | 1.40   | 56.00  | 54.00  | 56.00  | 69.00  |
| 1.20   | 0.63   | 0.75   | 56.00  | 39.00  | 72.00  | 70.00  |
| 1.80   | 2.25   | 1.70   | 55.00  | 57.00  | 53.00  | 71.00  |
| 1.20   | 1.50   | 1.30   | 52.00  | 57.00  | 64.00  | 75.00  |
| 0.20   | 1.13   | 0.50   | 62.00  | 31.00  | 73.00  | 67.00  |
| 0.60   | 0.50   | 0.60   | 50.00  | 50.00  | 71.00  | 60.00  |
| 1.60   | 0.25   | 0.50   | 55.00  | 77.00  | 88.00  | 79.00  |
| 1.00   | 1.75   | 1.45   | 65.00  | 48.00  | 70.00  | 69.00  |
| 0.80   | 1.63   | 0.90   | 47.00  | 43.00  | 64.00  | 74.00  |
| 1.00   | 1.20   | 1.63   | 60.00  | 52.00  | 73.00  | 60.00  |
| 1.00   | 1.63   | 1.25   | 49.00  | 59.00  | 65.00  | 74.00  |
| 2.00   | 2.40   | 2.50   | 54.00  | 56.00  | 63.00  | 77.00  |
| #NULL! | #NULL! | #NULL! | 38.00  | 82.00  | 43.00  | 45.00  |
| 1.80   | 2.00   | 1.60   | 52.00  | 58.00  | 63.00  | 62.00  |
| 1.00   | 1.75   | 1.40   | 66.00  | 54.00  | 72.00  | 69.00  |
| 1.60   | 2.38   | 1.70   | 63.16  | 46.67  | 54.74  | 76.25  |
| 1.60   | 1.50   | 1.15   | 50.00  | 52.00  | 44.00  | 91.00  |
| 1.40   | 0.50   | 0.90   | 58.00  | 58.00  | 71.00  | 71.00  |
| 1.60   | 1.50   | 1.65   | 52.00  | 58.00  | 57.89  | 71.00  |
| 0.20   | 1.38   | 0.85   | 60.00  | 52.00  | 51.00  | 70.00  |
| 1.60   | 1.63   | 1.55   | 47.00  | 69.00  | 63.00  | 71.00  |
| 1.40   | 1.63   | 1.45   | 65.00  | 58.00  | 70.00  | 52.00  |
| 0.29   | 1.00   | 2.38   | 59.00  | 38.95  | 74.00  | 74.00  |
| 2.00   | 2.13   | 1.75   | 51.00  | 50.00  | 61.00  | 51.00  |
| #NULL! | #NULL! | #NULL! | 58.00  | 44.00  | 49.00  | 70.00  |
| 0.80   | 1.50   | 0.80   | 51.00  | 28.00  | 74.00  | 79.00  |
| 1.00   | 2.88   | 1.85   | 56.00  | 56.00  | 83.00  | 78.95  |
| 1.60   | 0.88   | 1.15   | 63.00  | 42.00  | 64.00  | 61.00  |
| #NULL! | #NULL! | #NULL! | #NULL! | #NULL! | #NULL! | #NULL! |
| 0.80   | 1.13   | 0.85   | 55.00  | 61.00  | 67.00  | 51.00  |

|        |        |        |       |       |       |       |
|--------|--------|--------|-------|-------|-------|-------|
| 1.20   | 1.50   | 1.15   | 54.00 | 49.00 | 67.78 | 72.00 |
| 1.20   | 1.38   | 1.25   | 51.00 | 45.00 | 56.00 | 60.00 |
| 0.00   | 1.50   | 0.65   | 58.00 | 66.00 | 72.00 | 61.00 |
| #NULL! | #NULL! | #NULL! | 42.00 | 60.00 | 49.00 | 58.00 |
| 1.00   | 1.13   | 1.05   | 64.00 | 44.00 | 67.00 | 60.00 |
| 0.80   | 0.86   | 0.68   | 50.00 | 53.00 | 63.16 | 60.00 |
| 3.00   | 2.00   | 1.95   | 57.00 | 51.00 | 58.00 | 75.00 |
| 0.00   | 0.75   | 0.35   | 67.00 | 26.00 | 74.00 | 65.00 |
| #NULL! | #NULL! | #NULL! | 54.00 | 53.68 | 63.00 | 73.00 |
| 2.00   | 0.75   | 1.25   | 56.00 | 63.00 | 64.00 | 62.00 |
| 0.60   | 0.50   | 0.35   | 62.00 | 43.00 | 73.00 | 71.00 |
| 1.00   | 1.13   | 0.70   | 59.00 | 54.00 | 66.00 | 63.00 |
| 1.20   | 1.50   | 1.15   | 52.00 | 46.00 | 61.00 | 74.00 |
| 1.00   | 1.50   | 1.20   | 56.00 | 43.00 | 69.00 | 79.00 |
| 0.50   | 1.63   | 0.83   | 55.00 | 54.00 | 64.00 | 66.00 |
| #NULL! | #NULL! | #NULL! | 54.00 | 68.00 | 56.00 | 69.00 |
| 1.00   | 1.13   | 0.85   | 73.00 | 31.00 | 78.00 | 55.00 |
| #NULL! | #NULL! | #NULL! | 63.00 | 46.00 | 72.00 | 59.00 |
| 0.20   | 0.38   | 0.25   | 50.00 | 40.00 | 55.00 | 63.16 |
| 1.20   | 1.75   | 1.60   | 66.00 | 58.00 | 78.00 | 70.00 |
| #NULL! | #NULL! | #NULL! | 60.00 | 45.00 | 59.00 | 75.00 |
| 1.40   | 1.75   | 1.10   | 57.00 | 54.00 | 54.00 | 55.00 |
| #NULL! | #NULL! | #NULL! | 39.00 | 66.00 | 58.00 | 45.00 |
| 0.80   | 2.50   | 1.75   | 67.00 | 33.00 | 54.00 | 81.00 |
| 1.60   | 1.50   | 1.55   | 47.00 | 60.00 | 63.00 | 75.00 |
| 0.80   | 1.00   | 1.00   | 62.00 | 63.00 | 44.00 | 66.00 |
| 0.60   | 1.75   | 1.35   | 68.00 | 48.00 | 84.00 | 58.00 |
| 0.80   | 1.25   | 0.90   | 58.00 | 50.00 | 76.00 | 72.00 |
| #NULL! | #NULL! | #NULL! | 62.00 | 52.00 | 53.00 | 76.00 |
| #NULL! | #NULL! | #NULL! | 50.00 | 72.00 | 65.00 | 51.00 |
| #NULL! | #NULL! | #NULL! | 58.00 | 46.32 | 73.68 | 63.00 |
| 0.80   | 1.13   | 0.85   | 47.00 | 34.00 | 78.00 | 80.00 |
| 1.20   | 1.38   | 1.47   | 60.00 | 66.00 | 66.00 | 57.00 |
| 2.20   | 1.63   | 1.55   | 48.00 | 67.00 | 65.00 | 58.00 |
| 1.80   | 2.00   | 1.85   | 56.00 | 61.00 | 71.00 | 57.00 |
| 1.40   | 0.88   | 0.70   | 50.00 | 48.42 | 55.00 | 79.00 |
| #NULL! | #NULL! | #NULL! | 44.00 | 46.00 | 67.00 | 77.00 |
| 2.20   | 1.50   | 1.40   | 51.00 | 67.00 | 65.00 | 74.00 |
| 2.40   | 2.43   | 2.00   | 44.00 | 64.00 | 51.58 | 62.00 |
| #NULL! | #NULL! | #NULL! | 43.33 | 44.62 | 52.73 | 70.00 |
| 2.00   | 0.75   | 1.70   | 58.00 | 50.00 | 73.00 | 60.00 |
| 1.20   | 0.75   | 1.20   | 52.00 | 67.00 | 63.00 | 66.00 |
| 1.60   | 1.00   | 1.45   | 68.00 | 63.00 | 63.00 | 68.00 |
| 0.80   | 1.38   | 1.15   | 52.00 | 54.00 | 75.00 | 65.00 |
| 1.00   | 0.88   | 0.90   | 56.00 | 47.00 | 61.00 | 67.00 |
| 0.00   | 0.50   | 0.20   | 45.00 | 63.00 | 69.00 | 64.00 |
| 2.14   | 2.40   | 1.75   | 51.00 | 76.00 | 74.00 | 55.00 |
| 1.40   | 0.63   | 0.90   | 44.00 | 42.00 | 49.00 | 62.00 |
| 1.00   | 1.00   | 0.88   | 57.00 | 54.00 | 76.00 | 69.00 |
| 1.40   | 1.00   | 1.20   | 71.00 | 37.89 | 67.00 | 65.00 |
| 0.60   | 2.00   | 1.05   | 53.68 | 39.00 | 75.00 | 60.00 |
| #NULL! | #NULL! | #NULL! | 50.00 | 61.05 | 64.00 | 51.00 |
| 1.00   | 0.75   | 0.70   | 57.00 | 38.00 | 76.00 | 64.00 |
| 1.00   | 1.25   | 0.95   | 52.00 | 43.00 | 72.00 | 77.00 |
| 1.40   | 1.00   | 1.25   | 49.00 | 54.00 | 67.00 | 72.00 |
| 0.80   | 0.63   | 1.00   | 55.00 | 57.00 | 76.00 | 43.00 |

|        |        |        |       |       |       |       |
|--------|--------|--------|-------|-------|-------|-------|
| 1.29   | 1.20   | 2.25   | 54.00 | 61.00 | 73.00 | 69.00 |
| 0.00   | 1.13   | 0.45   | 61.00 | 35.00 | 83.00 | 82.00 |
| 0.00   | 0.50   | 0.45   | 66.00 | 28.00 | 76.00 | 94.00 |
| 1.20   | 1.88   | 1.25   | 65.00 | 66.32 | 71.00 | 60.00 |
| #NULL! | #NULL! | #NULL! | 56.00 | 62.00 | 79.00 | 76.00 |
| 0.00   | 0.63   | 0.30   | 57.00 | 46.00 | 59.00 | 57.00 |
| 1.60   | 2.13   | 1.70   | 57.00 | 48.00 | 66.00 | 73.00 |
| 0.00   | 0.00   | 0.00   | 64.00 | 38.00 | 84.00 | 73.68 |
| 1.20   | 2.88   | 1.95   | 40.00 | 62.00 | 45.00 | 77.00 |
| 1.80   | 1.25   | 1.80   | 64.00 | 46.00 | 72.00 | 72.00 |
| 1.80   | 1.88   | 1.95   | 45.00 | 59.00 | 74.00 | 65.00 |
| 0.40   | 1.25   | 0.60   | 52.00 | 58.00 | 78.00 | 67.00 |
| 1.80   | 1.25   | 1.35   | 68.00 | 54.00 | 81.00 | 65.00 |
| 1.40   | 1.50   | 1.63   | 69.00 | 60.00 | 73.00 | 77.00 |
| 1.60   | 1.88   | 1.75   | 50.00 | 65.56 | 56.67 | 52.00 |
| #NULL! | #NULL! | #NULL! | 26.00 | 67.00 | 48.00 | 24.00 |
| 1.00   | 1.63   | 1.40   | 55.00 | 59.00 | 63.16 | 56.00 |
| 1.00   | 0.75   | 0.75   | 49.00 | 53.00 | 67.00 | 80.00 |
| 2.20   | 1.25   | 1.70   | 53.00 | 41.00 | 58.00 | 71.00 |
| #NULL! | #NULL! | #NULL! | 61.00 | 38.00 | 65.00 | 70.00 |
| 0.80   | 1.13   | 0.75   | 47.00 | 40.00 | 72.00 | 83.00 |
| #NULL! | #NULL! | #NULL! | 56.00 | 45.00 | 63.00 | 71.00 |
| 1.00   | 1.75   | 1.10   | 52.00 | 35.00 | 70.00 | 91.00 |
| 0.80   | 1.25   | 0.90   | 53.00 | 50.00 | 74.00 | 75.00 |
| 0.00   | 1.50   | 0.80   | 46.32 | 40.00 | 65.00 | 66.00 |
| 0.60   | 1.00   | 0.80   | 60.00 | 49.00 | 74.00 | 69.00 |
| 1.60   | 0.88   | 1.50   | 63.00 | 45.00 | 73.00 | 51.00 |
| 0.00   | 1.38   | 0.55   | 57.00 | 46.00 | 69.00 | 51.00 |
| 1.80   | 0.75   | 1.25   | 53.00 | 65.00 | 74.00 | 63.00 |
| 1.60   | 1.25   | 1.40   | 62.00 | 37.00 | 65.00 | 74.00 |
| 1.20   | 1.00   | 1.10   | 54.00 | 41.00 | 64.00 | 84.00 |
| #NULL! | #NULL! | #NULL! | 56.00 | 65.00 | 56.84 | 70.00 |
| 2.20   | 1.50   | 2.00   | 56.00 | 54.00 | 46.00 | 61.00 |
| #NULL! | #NULL! | #NULL! | 54.00 | 40.00 | 79.00 | 77.00 |
| 2.60   | 1.50   | 1.80   | 63.00 | 56.00 | 64.00 | 53.68 |
| 1.20   | 1.00   | 1.10   | 71.00 | 50.00 | 62.00 | 58.00 |
| #NULL! | #NULL! | #NULL! | 60.00 | 58.00 | 56.00 | 69.00 |
| 1.40   | 1.38   | 1.60   | 73.00 | 54.00 | 68.00 | 68.00 |
| 2.80   | 1.63   | 2.15   | 59.00 | 62.11 | 53.00 | 72.00 |
| 0.80   | 1.13   | 0.85   | 61.00 | 59.00 | 67.00 | 55.00 |
| #NULL! | #NULL! | #NULL! | 54.00 | 56.00 | 63.00 | 66.00 |
| 1.20   | 1.38   | 1.30   | 59.00 | 59.00 | 69.00 | 67.00 |
| 1.80   | 2.38   | 1.50   | 46.00 | 61.00 | 58.00 | 44.00 |
| 0.00   | 1.80   | 1.50   | 48.00 | 42.00 | 67.00 | 84.00 |
| #NULL! | #NULL! | #NULL! | 54.00 | 54.00 | 71.00 | 69.00 |
| #NULL! | #NULL! | #NULL! | 57.00 | 67.00 | 70.00 | 72.00 |
| 0.00   | 1.38   | 0.55   | 68.00 | 37.00 | 72.00 | 76.00 |
| 0.80   | 1.38   | 0.85   | 61.00 | 61.00 | 68.00 | 50.00 |
| 1.00   | 0.50   | 0.75   | 58.00 | 41.00 | 66.00 | 67.00 |
| #NULL! | #NULL! | #NULL! | 60.00 | 56.00 | 56.00 | 65.00 |
| 0.80   | 0.88   | 0.75   | 42.00 | 48.00 | 74.00 | 65.00 |
| 1.80   | 1.29   | 1.37   | 55.00 | 56.00 | 69.47 | 72.63 |
| 0.80   | 2.13   | 1.45   | 53.00 | 51.00 | 67.00 | 71.00 |
| 0.80   | 1.75   | 1.50   | 47.37 | 64.21 | 61.05 | 58.00 |
| #NULL! | #NULL! | #NULL! | 53.00 | 45.00 | 74.00 | 74.74 |
| 1.00   | 1.50   | 1.20   | 58.95 | 54.00 | 57.00 | 65.00 |



|        |        |        |       |       |       |       |
|--------|--------|--------|-------|-------|-------|-------|
| 1.40   | 2.00   | 1.55   | 57.00 | 59.00 | 67.00 | 71.00 |
| 0.80   | 1.50   | 1.30   | 71.00 | 50.00 | 86.00 | 60.00 |
| 2.40   | 1.38   | 1.45   | 59.00 | 58.00 | 53.00 | 61.00 |
| 1.80   | 1.38   | 1.90   | 56.00 | 54.00 | 73.00 | 74.00 |
| 1.60   | 1.63   | 1.50   | 54.00 | 60.00 | 67.00 | 63.00 |
| 1.40   | 1.38   | 1.10   | 47.00 | 55.00 | 63.00 | 83.00 |
| 0.20   | 1.00   | 0.65   | 56.00 | 41.00 | 69.00 | 73.00 |
| #NULL! | #NULL! | #NULL! | 53.00 | 44.00 | 51.00 | 79.00 |
| 1.00   | 1.13   | 1.15   | 61.00 | 53.00 | 74.00 | 52.00 |
| 1.40   | 1.88   | 1.75   | 63.00 | 63.00 | 57.00 | 68.42 |
| 0.40   | 0.88   | 0.60   | 57.00 | 42.00 | 70.00 | 68.00 |
| #NULL! | #NULL! | #NULL! | 46.00 | 51.00 | 49.00 | 66.00 |
| #NULL! | #NULL! | #NULL! | 52.00 | 49.47 | 63.00 | 80.00 |
| 1.40   | 1.13   | 1.35   | 48.00 | 87.00 | 67.00 | 55.79 |
| 1.60   | 2.00   | 1.75   | 55.00 | 59.00 | 66.00 | 65.00 |
| 1.40   | 0.75   | 1.00   | 50.00 | 61.05 | 51.00 | 66.00 |
| 1.80   | 1.14   | 1.37   | 49.00 | 71.00 | 73.00 | 73.00 |
| 1.80   | 2.25   | 1.60   | 60.00 | 46.00 | 59.00 | 75.00 |
| 0.75   | 1.63   | 1.39   | 53.00 | 48.00 | 72.22 | 76.00 |
| 0.40   | 0.63   | 0.47   | 59.00 | 30.00 | 74.00 | 61.00 |
| 0.00   | 1.13   | 0.70   | 61.00 | 51.00 | 85.00 | 64.00 |
| 1.20   | 1.00   | 1.15   | 60.00 | 26.00 | 72.00 | 82.00 |
| 0.71   | 0.60   | 2.63   | 53.00 | 62.00 | 73.00 | 51.00 |
| 1.80   | 2.00   | 2.22   | 65.00 | 53.68 | 69.47 | 71.58 |
| 1.80   | 1.50   | 1.65   | 54.00 | 43.00 | 64.00 | 66.00 |
| 2.60   | 3.00   | 2.50   | 56.00 | 71.00 | 46.00 | 55.00 |
| 2.80   | 1.88   | 1.90   | 49.00 | 61.00 | 53.00 | 68.00 |
| 1.20   | 2.25   | 1.35   | 44.00 | 63.00 | 66.00 | 72.00 |
| 0.60   | 0.25   | 0.25   | 52.00 | 63.00 | 56.00 | 61.00 |
| 1.00   | 1.20   | 2.13   | 59.00 | 46.00 | 66.00 | 70.00 |
| 2.00   | 1.88   | 1.90   | 47.00 | 87.00 | 76.00 | 63.00 |
| 1.60   | 1.50   | 1.55   | 66.00 | 42.00 | 67.00 | 67.00 |
| 0.71   | 1.60   | 2.63   | 58.00 | 55.00 | 64.00 | 80.00 |
| 1.60   | 2.25   | 1.50   | 48.00 | 46.00 | 73.00 | 69.00 |
| 0.80   | 1.25   | 0.70   | 59.00 | 36.00 | 77.00 | 87.00 |
| #NULL! | #NULL! | #NULL! | 64.21 | 58.82 | 72.63 | 52.63 |
| 2.20   | 2.75   | 1.80   | 52.63 | 44.00 | 53.00 | 65.00 |
| 0.00   | 1.13   | 0.60   | 61.00 | 39.00 | 75.79 | 72.00 |
| 0.80   | 1.13   | 0.90   | 50.00 | 55.00 | 70.00 | 70.00 |
| 0.80   | 0.63   | 0.65   | 64.21 | 44.00 | 67.00 | 74.00 |
| 1.20   | 1.13   | 1.10   | 51.00 | 45.26 | 70.00 | 80.00 |
| 2.60   | 2.50   | 2.10   | 46.00 | 55.00 | 45.00 | 66.00 |
| 1.80   | 1.88   | 1.75   | 54.12 | 51.11 | 64.44 | 70.00 |
| #NULL! | #NULL! | #NULL! | 61.00 | 36.00 | 60.00 | 63.00 |
| 1.00   | 1.00   | 0.85   | 49.00 | 54.00 | 74.00 | 63.00 |
| #NULL! | #NULL! | #NULL! | 52.00 | 62.00 | 60.00 | 62.00 |
| 1.80   | 2.25   | 1.85   | 50.00 | 60.00 | 60.00 | 60.00 |
| 1.80   | 1.50   | 1.60   | 55.00 | 43.00 | 55.00 | 73.00 |
| 1.00   | 1.00   | 0.90   | 46.00 | 57.00 | 72.00 | 62.00 |
| 1.00   | 0.63   | 0.70   | 51.00 | 50.00 | 69.00 | 77.00 |
| 1.20   | 0.38   | 0.90   | 67.00 | 40.00 | 69.00 | 61.00 |
| 0.60   | 0.50   | 0.85   | 67.00 | 70.00 | 77.00 | 58.00 |
| 1.60   | 1.88   | 1.60   | 60.00 | 53.00 | 56.00 | 58.00 |
| #NULL! | #NULL! | #NULL! | 49.00 | 63.00 | 71.00 | 47.00 |
| 2.00   | 1.50   | 2.15   | 60.00 | 80.00 | 65.00 | 52.00 |
| 1.60   | 1.38   | 1.20   | 51.00 | 52.63 | 62.00 | 59.00 |

|        |        |        |       |       |       |       |
|--------|--------|--------|-------|-------|-------|-------|
| 0.80   | 0.63   | 0.60   | 60.00 | 36.00 | 86.00 | 88.00 |
| 1.20   | 1.38   | 1.25   | 49.00 | 64.00 | 79.00 | 71.00 |
| 1.20   | 0.63   | 0.55   | 55.00 | 34.74 | 60.00 | 80.00 |
| 0.40   | 0.38   | 0.30   | 52.00 | 43.00 | 72.00 | 76.00 |
| #NULL! | #NULL! | #NULL! | 52.00 | 50.00 | 68.00 | 77.00 |
| #NULL! | #NULL! | #NULL! | 64.00 | 42.00 | 66.00 | 62.00 |
| 0.00   | 1.50   | 0.60   | 48.00 | 38.00 | 79.00 | 75.79 |
| 1.00   | 1.38   | 1.40   | 65.00 | 64.00 | 74.00 | 43.00 |
| 0.00   | 0.75   | 0.70   | 59.00 | 77.00 | 78.00 | 55.00 |
| 0.80   | 1.38   | 0.75   | 58.00 | 51.00 | 52.00 | 62.00 |
| 0.80   | 2.88   | 1.45   | 43.00 | 61.00 | 71.00 | 69.00 |
| 1.00   | 1.75   | 1.30   | 50.00 | 50.00 | 68.00 | 71.00 |
| 0.60   | 0.75   | 0.70   | 61.00 | 29.00 | 70.00 | 81.00 |
| 1.80   | 1.25   | 1.65   | 56.00 | 46.32 | 65.26 | 77.89 |
| 0.20   | 0.63   | 0.35   | 44.21 | 45.00 | 71.00 | 79.00 |
| 1.40   | 1.50   | 1.30   | 37.89 | 51.00 | 63.00 | 66.00 |
| 3.57   | 3.80   | 3.25   | 70.53 | 56.25 | 54.67 | 82.11 |
| 0.86   | 1.40   | 2.50   | 69.00 | 40.00 | 84.00 | 75.00 |

| SD_P3 | CO_P3 | ST_P3 | avoidant_P3 | birthdate   | family_status | education |
|-------|-------|-------|-------------|-------------|---------------|-----------|
| 81.00 | 77.00 | 23.00 | 3.67        | 1949-פבר-26 | 2             | 6         |
| 57.00 | 83.00 | 61.00 | 1.67        | 1947-מרץ-05 | 2             | 4         |
| 74.00 | 77.00 | 40.00 | 3.00        | 1949-ספט-20 | 2             | 6         |
| 71.00 | 76.00 | 45.00 | 4.17        | #NULL!      | 2             | 2         |
| 60.00 | 86.00 | 25.00 | 2.33        | 1949-פבר-14 | 2             | 5         |
| 98.00 | 91.00 | 27.00 | 4.83        | 1962-דצמ-06 | 2             | #NULL!    |
| 75.00 | 80.00 | 33.00 | 3.00        | 1963-דצמ-21 | 2             | 5         |
| 82.11 | 80.00 | 42.00 | 2.33        | 2034-יונ-08 | 2             | 4         |
| 84.00 | 84.00 | 36.00 | 1.67        | 1953-יונ-26 | 2             | 5         |
| 83.00 | 86.00 | 38.40 | 4.67        | #NULL!      | 4             | -1        |
| 83.00 | 80.00 | 36.57 | 2.00        | 1944-פבר-01 | 2             | 4         |
| 79.00 | 76.00 | 43.00 | 2.00        | 1943-אפר-25 | 2             | 4         |
| 69.00 | 86.00 | 57.00 | 2.00        | 1960-פבר-04 | 2             | 5         |
| 77.00 | 77.00 | 39.00 | 5.00        | #NULL!      | 2             | 6         |
| 65.00 | 65.00 | 44.00 | 4.00        | 2030-יונ-27 | 3             | 5         |
| 81.00 | 80.00 | 35.00 | 2.17        | 1961-יול-22 | 2             | 6         |
| 80.00 | 78.00 | 54.00 | 2.17        | 1942-יונ-24 | 3             | 6         |
| 92.00 | 85.00 | 18.00 | 3.00        | 1955-ספט-09 | 2             | 2         |
| 59.00 | 64.00 | 40.00 | 3.67        | 2025-יול-31 | 2             | 6         |
| 72.00 | 82.00 | 37.00 | 3.33        | 2040-יונ-04 | 3             | 2         |
| 82.00 | 76.00 | 26.00 | 2.67        | 1961-פבר-13 | 2             | 5         |
| 85.00 | 79.00 | 43.00 | 2.33        | 1944-אוג-16 | 2             | 6         |
| 89.00 | 71.58 | 23.00 | 2.50        | 1953-פבר-14 | 2             | 5         |
| 63.00 | 66.00 | 43.00 | 3.83        | 1966-אפר-05 | 2             | 5         |
| 67.00 | 70.00 | 19.00 | 2.83        | 1948-נוב-06 | 2             | 6         |
| 85.00 | 75.00 | 38.00 | 1.17        | 1947-אוג-11 | 2             | 5         |
| 77.00 | 67.00 | 36.00 | 2.67        | 1950-ספט-07 | 2             | 3         |
| 69.00 | 84.00 | 54.00 | 2.67        | 1961-נוב-14 | 2             | 5         |
| 74.00 | 73.00 | 37.00 | 3.83        | 1944-יונ-15 | 2             | #NULL!    |
| 76.00 | 81.00 | 48.00 | 3.33        | 1951-אוג-03 | 2             | 6         |
| 77.00 | 78.00 | 23.00 | 2.33        | 1944-ספט-22 | 2             | 2         |
| 87.00 | 73.00 | 23.00 | 2.50        | 1955-ספט-09 | 4             | 5         |
| 53.00 | 72.00 | 32.00 | 3.00        | 1957-אוק-07 | 1             | 3         |
| 82.00 | 89.00 | 25.00 | 3.83        | 1949-דצמ-25 | 3             | 5         |
| 77.00 | 78.00 | 59.00 | 5.33        | #NULL!      | #NULL!        | #NULL!    |
| 87.00 | 77.00 | 58.00 | 5.00        | #NULL!      | #NULL!        | #NULL!    |
| 69.00 | 85.00 | 35.00 | 3.50        | #NULL!      | #NULL!        | #NULL!    |
| 73.00 | 81.11 | 38.00 | 4.33        | #NULL!      | #NULL!        | #NULL!    |
| 87.00 | 84.00 | 42.00 | 4.67        | 1944-אפר-24 | 2             | #NULL!    |
| 68.00 | 83.00 | 51.00 | 2.17        | 1950-אוג-09 | 2             | 4         |
| 77.00 | 60.00 | 35.00 | 4.00        | 2017-יונ-13 | 2             | 4         |
| 67.00 | 74.00 | 45.00 | 2.17        | 2032-אפר-25 | 4             | 5         |
| 72.00 | 76.00 | 36.00 | 4.17        | 1948-פבר-12 | 2             | 4         |
| 82.00 | 79.00 | 40.00 | 3.83        | 1943-דצמ-26 | 2             | 4         |
| 66.00 | 83.00 | 60.80 | 4.33        | #NULL!      | 2             | 5         |
| 87.00 | 77.00 | 36.00 | 1.50        | 1966-יונ-05 | 2             | 6         |
| 80.00 | 80.00 | 47.00 | 1.17        | 1948-יונ-15 | 2             | 5         |
| 68.00 | 77.00 | 42.00 | 1.50        | 1953-יונ-22 | 1             | 4         |
| 81.00 | 70.00 | 40.00 | 1.17        | 1954-נוב-24 | 2             | 5         |
| 90.00 | 74.00 | 23.00 | 3.00        | 1952-נוב-16 | 2             | 3         |
| 90.00 | 88.00 | 31.00 | 1.83        | 1944-יונ-09 | 2             | 6         |
| 69.00 | 82.00 | 23.00 | 2.50        | 1946-נוב-02 | 2             | 4         |
| 79.00 | 83.00 | 41.00 | 1.17        | 1946-יול-17 | 2             | 2         |
| 82.00 | 84.00 | 67.00 | 2.17        | 1955-ספט-09 | 4             | 4         |
| 71.00 | 80.00 | 44.00 | #NULL!      | 1950-אוק-31 | 1             | 2         |

|        |        |        |        |             |        |        |
|--------|--------|--------|--------|-------------|--------|--------|
| 77.00  | 77.00  | 36.00  | 3.50   | 1943-פבר-23 | 2      | 2      |
| 87.00  | 84.00  | 39.00  | 2.00   | 1949-מרץ-05 | -1     | 6      |
| 77.00  | 77.89  | 35.00  | 2.17   | 1963-אוק-20 | 2      | 5      |
| 67.00  | 81.00  | 54.00  | 2.00   | 1944-יונ-29 | 2      | 2      |
| 82.00  | 78.00  | 28.00  | 2.33   | 1944-נוב-05 | 4      | 5      |
| 73.68  | 81.00  | 57.00  | 1.67   | 1945-מאי-24 | 3      | 5      |
| 81.00  | 63.00  | 20.00  | 4.83   | 1943-ספט-22 | 2      | 3      |
| 78.00  | 79.00  | 32.00  | 2.17   | 1947-יול-03 | 3      | 5      |
| 59.00  | 89.00  | 51.00  | 3.17   | 1966-ספט-13 | 3      | 3      |
| 69.00  | 55.79  | 33.00  | 4.67   | 2034-דצמ-31 | 4      | 3      |
| 73.00  | 69.00  | 50.00  | 1.33   | 2036-אפר-24 | 2      | 5      |
| 74.00  | 74.74  | 38.00  | 1.00   | 2037-ינו-07 | 2      | 4      |
| 78.00  | 88.00  | 39.00  | 2.33   | 2035-ספט-15 | 2      | 6      |
| 72.63  | 71.00  | 37.00  | 3.33   | 2035-יול-09 | 2      | 4      |
| 59.00  | 81.00  | 48.00  | 3.50   | 1950-ספט-14 | 2      | 4      |
| 88.00  | 92.00  | 38.00  | 1.17   | 1966-מאי-25 | 2      | 3      |
| 86.00  | 81.00  | 45.00  | 3.00   | 1952-נוב-04 | 4      | 4      |
| 81.00  | 76.00  | 33.00  | 2.33   | 1955-אפר-28 | 2      | 4      |
| 54.00  | 77.00  | 42.00  | 3.17   | 1956-פבר-10 | 2      | 6      |
| 73.00  | 84.21  | 47.00  | 2.50   | 1959-דצמ-16 | 2      | 5      |
| 88.00  | 85.00  | 29.00  | 2.00   | 1957-אוק-24 | 2      | 2      |
| 80.00  | 84.00  | 44.00  | 2.50   | 1947-מאי-29 | 2      | 3      |
| 82.00  | 85.00  | 57.00  | 1.83   | 1965-יול-06 | 2      | 4      |
| 55.00  | 66.00  | 37.00  | 5.33   | 1956-נוב-01 | 2      | 5      |
| 73.00  | 74.00  | 32.00  | 2.00   | 1952-ינו-08 | 2      | 6      |
| 71.00  | 68.00  | 22.00  | 4.50   | 1951-פבר-14 | 2      | 3      |
| 63.00  | 72.00  | 28.00  | 2.50   | 1951-יונ-26 | 2      | 6      |
| 82.00  | 84.00  | 65.00  | 1.67   | 1960-מרץ-08 | 3      | 3      |
| 72.00  | 74.00  | 36.00  | 3.67   | 2034-מאי-21 | 2      | 4      |
| 78.00  | 84.00  | 59.00  | 2.83   | 1961-יונ-06 | 2      | 5      |
| 89.00  | 91.00  | 47.00  | 1.83   | 1957-פבר-26 | 2      | 2      |
| 81.00  | 89.00  | 25.00  | 2.33   | 1954-דצמ-05 | 2      | 4      |
| 65.00  | 86.00  | 24.00  | 1.83   | 1959-יונ-04 | 1      | 5      |
| 72.00  | 75.00  | 50.13  | 2.33   | 1953-אפר-25 | 2      | 4      |
| 83.00  | 80.00  | 30.00  | 2.67   | 1951-אוק-07 | 2      | 7      |
| 84.00  | 82.00  | 45.00  | 5.67   | #NULL!      | 2      | 5      |
| 68.00  | 71.00  | 30.00  | 2.50   | 1955-יונ-10 | 2      | 5      |
| 57.00  | 66.00  | 33.00  | 4.50   | #NULL!      | 2      | 6      |
| 41.00  | 68.00  | 17.00  | 6.67   | 1963-אוג-13 | 2      | 6      |
| 81.00  | 76.00  | 34.00  | 4.33   | 1942-פבר-04 | 2      | 4      |
| 61.00  | 70.00  | 52.00  | 2.50   | 1945-פבר-19 | 3      | 4      |
| 75.79  | 72.63  | 35.43  | 2.67   | 1953-נוב-09 | 2      | 5      |
| 90.00  | 82.00  | 30.00  | 2.67   | 1953-מאי-15 | 2      | 6      |
| 80.00  | 77.00  | 45.00  | 2.33   | 1942-פבר-20 | 1      | 5      |
| 67.00  | 66.00  | 45.00  | 4.17   | 1958-יול-04 | 2      | 4      |
| 73.00  | 72.00  | 33.00  | 3.67   | 2037-נוב-18 | 2      | 5      |
| 79.00  | 72.00  | 37.00  | 5.67   | 1952-ספט-21 | 2      | 6      |
| 68.00  | 79.00  | 37.00  | 2.67   | 1960-יונ-23 | 2      | 5      |
| 83.00  | 79.00  | 47.00  | 5.00   | #NULL!      | 2      | 4      |
| 74.00  | 74.00  | 34.00  | 4.00   | 1962-יונ-02 | 2      | 3      |
| 79.00  | 72.00  | 29.00  | 2.67   | 1955-ספט-09 | 2      | 4      |
| 81.00  | 90.00  | 38.40  | 2.67   | 1962-יול-04 | 3      | 2      |
| 79.00  | 77.00  | 31.00  | 1.33   | 1950-יול-06 | 2      | 3      |
| 73.00  | 78.00  | 54.00  | 2.50   | 1963-מאי-24 | 2      | 3      |
| #NULL! | #NULL! | #NULL! | #NULL! | #NULL!      | #NULL! | #NULL! |
| 68.00  | 76.00  | 43.73  | 3.67   | 1948-אוק-04 | 3      | 5      |

|       |       |       |        |             |   |        |
|-------|-------|-------|--------|-------------|---|--------|
| 79.00 | 71.00 | 65.00 | 2.00   | 1948-יונ-22 | 3 | 4      |
| 81.00 | 71.00 | 36.00 | 2.17   | 1955-ספט-09 | 2 | 5      |
| 66.00 | 78.00 | 24.00 | 2.50   | 1964-נוב-09 | 2 | 6      |
| 70.00 | 64.00 | 33.00 | 3.83   | 1950-אוק-04 | 2 | 7      |
| 71.00 | 57.00 | 44.00 | 2.83   | 1949-יול-21 | 3 | 5      |
| 75.00 | 80.00 | 39.47 | 1.83   | 2025-יול-06 | 2 | 5      |
| 72.00 | 74.00 | 41.00 | 3.67   | 1948-מאי-30 | 2 | 4      |
| 93.00 | 96.00 | 40.00 | 5.00   | 1965-ינו-28 | 2 | #NULL! |
| 82.00 | 87.00 | 31.00 | #NULL! | 1961-דצמ-25 | 2 | 3      |
| 61.00 | 82.00 | 32.00 | 2.83   | 1965-יול-21 | 2 | 4      |
| 84.00 | 82.00 | 45.00 | 1.50   | 1954-יול-06 | 2 | 5      |
| 72.00 | 82.00 | 43.00 | 2.17   | 1951-אוג-06 | 2 | 3      |
| 70.00 | 69.00 | 33.00 | 3.67   | 1943-פבר-22 | 2 | 5      |
| 72.00 | 70.00 | 28.00 | 4.83   | 1958-אפר-13 | 2 | #NULL! |
| 84.00 | 83.00 | 38.00 | 2.50   | 1955-אוק-17 | 2 | 5      |
| 54.00 | 63.00 | 45.00 | 3.50   | 2036-אפר-23 | 3 | 4      |
| 62.00 | 87.00 | 36.00 | 1.33   | 1950-אוק-28 | 3 | 5      |
| 75.00 | 83.00 | 55.00 | 1.17   | 1954-פבר-17 | 2 | 6      |
| 85.00 | 78.00 | 44.00 | 2.33   | 1955-ספט-09 | 2 | 5      |
| 70.00 | 65.26 | 44.00 | 3.83   | 1946-אוק-22 | 2 | #NULL! |
| 71.00 | 77.78 | 52.00 | 2.50   | 1953-אוג-14 | 1 | 5      |
| 63.00 | 81.00 | 23.00 | 3.17   | 1963-יול-04 | 2 | 3      |
| 52.00 | 83.00 | 37.00 | 4.67   | 1953-אוק-23 | 2 | 5      |
| 86.00 | 52.00 | 31.00 | 3.67   | 1966-מאי-13 | 2 | 5      |
| 80.00 | 88.00 | 34.00 | 4.17   | 1948-מאי-28 | 4 | 3      |
| 61.00 | 78.00 | 22.00 | 4.83   | 1966-פבר-02 | 2 | 5      |
| 92.00 | 90.00 | 61.00 | 5.00   | 1953-אוג-12 | 2 | #NULL! |
| 74.00 | 74.00 | 38.00 | 2.00   | 1955-יול-20 | 2 | 6      |
| 83.16 | 65.00 | 43.00 | 2.17   | 1945-אפר-09 | 3 | 5      |
| 55.00 | 67.00 | 30.00 | 2.67   | 1957-אוג-07 | 3 | 3      |
| 58.00 | 73.68 | 25.00 | 2.17   | 1956-דצמ-16 | 3 | 3      |
| 91.00 | 86.00 | 26.00 | 1.17   | 1967-ינו-27 | 2 | 5      |
| 62.00 | 73.00 | 39.00 | 2.00   | 1942-יונ-03 | 4 | 5      |
| 72.00 | 66.00 | 32.00 | 3.00   | 1946-מרץ-13 | 2 | 2      |
| 57.00 | 73.00 | 40.00 | 2.67   | 1955-ספט-09 | 2 | 3      |
| 85.00 | 87.00 | 52.00 | 2.83   | 1955-ספט-09 | 2 | 4      |
| 95.00 | 87.00 | 21.00 | 1.50   | 2034-אוק-27 | 2 | 5      |
| 70.00 | 79.00 | 59.00 | 2.33   | 1957-ינו-08 | 2 | 3      |
| 71.58 | 71.00 | 28.80 | 4.50   | 1947-אוק-13 | 2 | 7      |
| 72.86 | 70.00 | 36.80 | 3.17   | 1954-אוק-23 | 2 | 6      |
| 66.00 | 94.00 | 61.00 | 1.33   | 1941-דצמ-23 | 2 | 2      |
| 52.00 | 68.00 | 43.00 | 3.83   | 1960-אוק-21 | 2 | 5      |
| 47.00 | 80.00 | 42.00 | 4.00   | 1965-מרץ-25 | 2 | 3      |
| 76.00 | 75.00 | 49.00 | 3.67   | 1957-מאי-02 | 2 | 6      |
| 79.00 | 75.00 | 56.00 | 3.50   | 1945-אוק-15 | 3 | 6      |
| 87.00 | 88.00 | 28.00 | 1.17   | 1945-אוג-31 | 2 | 6      |
| 55.00 | 78.00 | 46.00 | 4.33   | #NULL!      | 2 | 2      |
| 79.00 | 81.00 | 51.00 | 3.83   | 2036-יול-19 | 2 | #NULL! |
| 75.00 | 86.00 | 50.00 | 1.17   | 1957-אוק-27 | 2 | 5      |
| 71.00 | 78.00 | 56.00 | 2.17   | 1954-פבר-10 | 2 | 5      |
| 84.00 | 78.95 | 28.00 | 2.00   | 1955-ספט-09 | 3 | 5      |
| 67.00 | 66.00 | 38.00 | 3.67   | 1943-דצמ-07 | 2 | 5      |
| 85.00 | 83.00 | 36.00 | 1.67   | 1959-מרץ-17 | 2 | 5      |
| 77.00 | 73.00 | 39.00 | 2.33   | 1955-יול-19 | 2 | 3      |
| 70.00 | 85.00 | 28.00 | 3.67   | 1958-אפר-27 | 2 | 6      |
| 65.00 | 80.00 | 50.00 | 2.83   | 1959-מרץ-10 | 3 | 6      |

|       |       |       |        |              |    |        |
|-------|-------|-------|--------|--------------|----|--------|
| 82.00 | 85.00 | 46.00 | 4.17   | #NULL!       | 3  | 6      |
| 83.00 | 72.00 | 47.00 | 3.17   | 1962-אפר-25  | 2  | 4      |
| 87.37 | 92.00 | 57.00 | 2.17   | 1957-יוני-02 | 2  | 2      |
| 61.00 | 75.00 | 42.00 | 2.83   | 1943-ספט-20  | 3  | 5      |
| 65.00 | 68.00 | 48.00 | 3.00   | 1957-דצמ-29  | 2  | 4      |
| 85.00 | 79.00 | 47.00 | 2.00   | 1942-יולי-14 | 2  | 2      |
| 80.00 | 80.00 | 39.00 | 3.33   | 1956-פבר-06  | 2  | 5      |
| 82.00 | 83.00 | 63.00 | 1.17   | 1964-ינו-02  | 2  | 4      |
| 77.00 | 58.00 | 20.00 | 6.00   | 1943-אוג-30  | 1  | 5      |
| 68.00 | 72.00 | 34.00 | 2.33   | 1946-מאי-12  | 3  | 5      |
| 54.00 | 83.00 | 45.00 | 1.67   | 2035-אוג-05  | 4  | 2      |
| 57.00 | 84.00 | 32.00 | 3.33   | 1964-ינו-22  | 3  | 4      |
| 93.00 | 88.00 | 48.00 | 2.67   | 1953-אוג-19  | 2  | 5      |
| 66.32 | 78.00 | 66.00 | 4.00   | 1961-אוק-08  | 2  | 3      |
| 50.00 | 67.37 | 46.93 | 4.83   | 1951-אוק-16  | 3  | 5      |
| 53.00 | 74.00 | 18.00 | 5.17   | 1945-נוב-01  | 3  | 5      |
| 67.00 | 76.00 | 37.00 | 3.67   | 1943-דצמ-14  | 2  | 2      |
| 70.00 | 78.00 | 39.00 | 1.83   | 1943-אפר-05  | 2  | 6      |
| 62.00 | 83.00 | 30.00 | 3.00   | 1944-דצמ-25  | 3  | 6      |
| 85.00 | 79.00 | 40.00 | 1.33   | 2035-אוג-10  | 4  | 6      |
| 79.00 | 90.00 | 42.00 | 3.00   | 2037-יוני-25 | 1  | 4      |
| 79.00 | 73.00 | 34.00 | 2.00   | 1945-פבר-11  | 2  | 6      |
| 81.00 | 78.00 | 30.00 | 2.50   | 1963-מאי-22  | 2  | 6      |
| 77.00 | 76.00 | 53.00 | 2.50   | 1960-אוק-17  | 3  | 3      |
| 80.00 | 80.00 | 36.00 | 1.33   | 1943-אוק-04  | 2  | 5      |
| 89.00 | 89.00 | 70.40 | 1.50   | 1944-דצמ-02  | 2  | 3      |
| 67.00 | 74.00 | 59.00 | 2.50   | 1958-אוג-07  | 2  | 4      |
| 80.00 | 86.00 | 43.00 | 3.17   | 1952-יולי-21 | 2  | 4      |
| 76.00 | 81.00 | 54.00 | 4.00   | 1943-אוק-03  | 4  | 3      |
| 71.00 | 85.00 | 46.00 | 2.83   | 1959-מאי-24  | 2  | 5      |
| 77.00 | 71.00 | 61.00 | 2.50   | 1966-ינו-15  | 1  | 5      |
| 75.00 | 66.00 | 53.33 | 4.67   | 2032-אוק-07  | 2  | 6      |
| 62.00 | 60.00 | 36.00 | 3.00   | 2033-ספט-05  | 2  | 6      |
| 78.00 | 87.37 | 47.00 | 2.50   | 1951-פבר-17  | 2  | 6      |
| 55.00 | 74.00 | 32.00 | 4.17   | 1951-מאי-14  | 3  | 4      |
| 72.00 | 77.00 | 64.00 | 3.33   | 2037-ספט-07  | 4  | 4      |
| 71.00 | 69.00 | 27.00 | 4.67   | 1946-דצמ-25  | 2  | 5      |
| 60.00 | 78.00 | 46.00 | 3.83   | 1967-פבר-25  | 3  | 5      |
| 51.00 | 62.00 | 30.93 | 3.83   | 1955-ספט-09  | 2  | #NULL! |
| 61.00 | 89.00 | 62.00 | 3.20   | 1942-פבר-26  | 3  | 6      |
| 76.00 | 75.00 | 43.00 | #NULL! | 2034-דצמ-07  | 2  | 5      |
| 75.00 | 73.00 | 34.00 | 3.67   | 1953-מרץ-27  | 2  | 5      |
| 64.00 | 77.89 | 27.00 | 4.17   | 1944-פבר-07  | 4  | 2      |
| 86.00 | 95.00 | 56.00 | 4.00   | #NULL!       | 2  | 5      |
| 84.00 | 81.00 | 43.00 | 3.50   | 1953-מרץ-13  | 2  | 4      |
| 75.00 | 71.00 | 42.00 | 2.50   | 1957-מאי-03  | 2  | 3      |
| 82.00 | 83.00 | 52.00 | 2.00   | 1952-נוב-11  | 3  | 6      |
| 82.00 | 78.00 | 27.00 | 2.83   | 2037-יולי-22 | 2  | 4      |
| 76.00 | 77.00 | 49.00 | 3.00   | 1967-יוני-13 | 2  | 5      |
| 68.00 | 79.00 | 66.00 | 2.67   | 1958-מאי-25  | 3  | 6      |
| 85.00 | 80.00 | 29.00 | 4.67   | 1953-מרץ-29  | 3  | #NULL! |
| 69.00 | 73.00 | 50.00 | 3.67   | 1949-נוב-19  | -1 | 6      |
| 80.00 | 68.00 | 29.00 | 3.00   | 1955-ספט-09  | 2  | 5      |
| 69.00 | 75.79 | 28.31 | 2.17   | 1961-מאי-10  | 3  | 4      |
| 82.00 | 80.00 | 44.00 | 2.83   | 1955-ספט-14  | 3  | 5      |
| 63.00 | 59.00 | 38.00 | 1.83   | 1962-פבר-25  | 2  | 5      |

|       |       |       |        |             |   |        |
|-------|-------|-------|--------|-------------|---|--------|
| 69.00 | 64.00 | 39.00 | 2.33   | 1942-נוב-01 | 2 | 4      |
| 61.00 | 73.00 | 53.00 | 2.00   | 1955-יונ-30 | 2 | 5      |
| 62.00 | 72.00 | 25.00 | 3.00   | 1962-אוק-27 | 2 | 3      |
| 67.00 | 65.00 | 50.00 | 3.17   | 1941-אוג-13 | 2 | 4      |
| 68.00 | 69.00 | 36.00 | 3.00   | 1961-פבר-24 | 3 | 3      |
| 80.00 | 75.00 | 34.00 | 4.83   | 1944-ספט-19 | 3 | 6      |
| 80.00 | 87.00 | 54.00 | 3.17   | 1946-אוג-09 | 2 | 6      |
| 76.00 | 72.00 | 27.00 | 3.00   | 2035-ינו-06 | 2 | 7      |
| 79.00 | 80.00 | 38.00 | 2.00   | 1956-מרץ-28 | 2 | 5      |
| 62.00 | 73.00 | 51.00 | 3.50   | 1957-מאי-16 | 3 | 3      |
| 85.00 | 83.00 | 37.00 | 3.17   | 1956-פבר-06 | 2 | 5      |
| 74.00 | 66.00 | 29.00 | 3.00   | 2036-מרץ-05 | 2 | 4      |
| 76.00 | 69.00 | 61.00 | #NULL! | 1953-ינו-08 | 3 | 5      |
| 54.00 | 74.00 | 29.00 | 3.33   | 1958-מאי-13 | 3 | 5      |
| 68.00 | 72.00 | 51.00 | 3.17   | 1965-ינו-11 | 2 | 5      |
| 74.00 | 70.53 | 37.00 | 3.50   | 1948-פבר-20 | 3 | 5      |
| 71.00 | 85.00 | 61.00 | 3.33   | 1956-ינו-01 | 2 | 2      |
| 75.00 | 72.00 | 30.00 | 2.83   | 1958-אוק-21 | 2 | 3      |
| 61.00 | 68.00 | 49.00 | 1.67   | 2027-ספט-03 | 2 | 2      |
| 89.00 | 90.00 | 52.00 | 1.67   | 1960-פבר-24 | 2 | 5      |
| 63.00 | 78.00 | 53.00 | 1.00   | 1953-מרץ-05 | 3 | 5      |
| 90.00 | 90.00 | 72.00 | 1.67   | 1957-ינו-12 | 3 | 4      |
| 68.00 | 80.00 | 45.00 | 5.50   | #NULL!      | 2 | 5      |
| 59.00 | 75.71 | 58.67 | #NULL! | 1956-אוג-30 | 3 | 1      |
| 65.00 | 82.00 | 65.00 | 2.83   | 1953-ספט-28 | 2 | 5      |
| 66.00 | 72.00 | 31.00 | 5.00   | 1946-ינו-16 | 2 | 5      |
| 78.00 | 75.00 | 34.00 | 4.67   | 1959-מאי-30 | 2 | 7      |
| 86.00 | 89.00 | 23.00 | 2.17   | 1962-אוג-06 | 2 | 5      |
| 72.00 | 73.00 | 28.00 | 5.33   | 1949-נוב-15 | 2 | 5      |
| 83.00 | 84.00 | 64.00 | 4.80   | #NULL!      | 2 | 3      |
| 60.00 | 64.00 | 32.00 | 3.00   | 1964-ספט-04 | 2 | 2      |
| 75.00 | 66.32 | 50.00 | 3.50   | 1942-מרץ-29 | 3 | 5      |
| 71.00 | 76.00 | 33.00 | 4.67   | #NULL!      | 2 | 5      |
| 68.00 | 79.00 | 42.00 | 1.50   | 1955-ספט-09 | 3 | 4      |
| 68.00 | 80.00 | 62.00 | 2.33   | 1950-יונ-27 | 2 | 4      |
| 85.26 | 66.00 | 50.13 | #NULL! | 1949-אוג-25 | 2 | 5      |
| 71.00 | 71.00 | 22.00 | 5.33   | 2036-נוב-30 | 2 | 5      |
| 83.00 | 86.32 | 61.00 | 1.83   | 1946-מאי-01 | 2 | 5      |
| 75.00 | 73.00 | 31.00 | 2.33   | 1942-מאי-18 | 3 | 5      |
| 80.00 | 84.00 | 58.00 | 2.67   | 1947-יול-08 | 2 | 4      |
| 82.00 | 87.00 | 44.80 | 4.17   | 1955-ספט-09 | 2 | 4      |
| 69.00 | 80.00 | 38.00 | 3.83   | 1954-מרץ-13 | 2 | #NULL! |
| 80.00 | 85.26 | 30.93 | 2.50   | 2035-מרץ-03 | 2 | 2      |
| 81.00 | 87.00 | 53.00 | 4.33   | 1944-ינו-06 | 4 | 5      |
| 78.00 | 81.00 | 32.00 | 2.17   | 1956-מאי-29 | 2 | 6      |
| 74.00 | 69.00 | 49.00 | #NULL! | 2026-ינו-06 | 4 | 4      |
| 73.00 | 76.00 | 36.00 | 3.83   | 2032-מרץ-12 | 2 | 4      |
| 78.00 | 83.00 | 34.00 | 2.50   | 1946-דצמ-23 | 2 | 6      |
| 68.00 | 86.00 | 48.00 | 2.67   | 1958-אוג-31 | 2 | 5      |
| 84.00 | 87.00 | 58.00 | 1.83   | 1959-אוק-15 | 2 | 7      |
| 71.00 | 81.00 | 52.00 | 4.83   | 1951-יונ-26 | 3 | #NULL! |
| 60.00 | 83.00 | 58.00 | 3.00   | 1955-ספט-09 | 4 | 6      |
| 70.00 | 68.00 | 35.20 | 4.40   | 2036-ינו-06 | 2 | 5      |
| 62.00 | 69.00 | 53.00 | 3.67   | 1951-פבר-17 | 3 | 3      |
| 46.00 | 70.00 | 49.00 | 4.00   | 1952-נוב-12 | 2 | #NULL! |
| 84.00 | 88.00 | 31.00 | 1.83   | 1947-מאי-02 | 2 | 5      |

|       |       |       |        |             |        |   |        |
|-------|-------|-------|--------|-------------|--------|---|--------|
| 84.00 | 69.00 | 41.00 | 2.83   | 1950-נוב-22 |        | 2 | 4      |
| 69.00 | 75.00 | 46.00 | 2.17   | 1953-יול-28 |        | 2 | 7      |
| 84.00 | 74.00 | 31.00 | 2.50   | 1955-טפס-09 |        | 2 | 5      |
| 80.00 | 78.00 | 60.00 | 1.67   | 1945-טפס-21 |        | 3 | 3      |
| 80.00 | 80.00 | 41.00 | 3.17   | 1962-מצד-19 |        | 2 | 5      |
| 72.00 | 74.00 | 43.00 | 2.17   | 1959-קא-22  |        | 2 | 2      |
| 86.32 | 80.00 | 40.00 | 2.00   | 1953-גא-27  |        | 2 | 5      |
| 53.00 | 66.00 | 40.00 | 2.50   | 1946-גא-29  |        | 3 | 6      |
| 46.00 | 63.00 | 34.00 | 2.50   | 1964-יול-19 |        | 3 | 4      |
| 79.00 | 68.00 | 35.00 | 3.17   | #NULL!      | #NULL! |   | #NULL! |
| 77.00 | 72.00 | 21.00 | 1.83   | #NULL!      | #NULL! |   | #NULL! |
| 79.00 | 76.00 | 32.00 | 2.33   | #NULL!      | #NULL! |   | #NULL! |
| 94.00 | 94.00 | 47.00 | 3.00   | #NULL!      | #NULL! |   | #NULL! |
| 73.00 | 84.00 | 56.00 | 3.50   | #NULL!      | #NULL! |   | #NULL! |
| 72.00 | 72.00 | 42.00 | #NULL! | #NULL!      | #NULL! |   | #NULL! |
| 69.00 | 67.00 | 46.00 | #NULL! | #NULL!      | #NULL! |   | #NULL! |
| 55.00 | 54.67 | 64.00 | #NULL! | #NULL!      | #NULL! |   | #NULL! |
| 69.00 | 81.00 | 51.00 | 3.83   | #NULL!      | #NULL! |   | #NULL! |



| religion | children | birth_country | occupation           | pas    | sac    |
|----------|----------|---------------|----------------------|--------|--------|
|          | 1        | 3 israel      | Pharmacy             |        | 3 2    |
|          | 1        | 3 germany     | Art                  |        | 0 5    |
|          | 1        | 2 israel      | Language Teacher     |        | 1 4    |
|          | 2        | 3 egypt       | Pensioner            |        | 9 5    |
|          | 1        | 3 israel      | Bookkeeper           |        | 0 6    |
|          | 1        | 3 israel      | Agriculturist        |        | 5 3    |
|          | 1        | 3 israel      | 999                  |        | 1 3    |
|          | 1        | 3 romania     | Computer Technician  |        | 1 -1   |
|          | 1        | 3 israel      | Teacher              |        | 4 -1   |
|          | 1        | 4 israel      | secretary            |        | 8 6    |
|          | 1        | 3 israel      | Assist Dentist       |        | 3 3    |
|          | 1        | 3 israel      | Archivist            |        | 4 -1   |
|          | 1        | 2 israel      | Teacher              |        | 1 3    |
|          | 1        | 2 israel      | Economist            |        | 2 3    |
|          | 1        | 2 israel      | pensioner            |        | 2 3    |
|          | 1        | 3 israel      | Teacher              |        | 1 2    |
|          | 1        | 3 israel      | Social worker        |        | 2 3    |
|          | 1        | 3 israel      | 999                  |        | 2 2    |
|          | 1        | 2 germany     | Public Health        |        | 2 4    |
|          | 1        | 3 israel      | archivist            |        | 0 2    |
|          | 1        | 5 israel      | Self Employed        |        | 3 4    |
|          | 1        | 3 israel      | Manager              |        | 3 5    |
|          | 1        | 3 israel      | Financial exacutiva  |        | 3 2    |
|          | 1        | 2 israel      | water agriculturist  |        | 1 4    |
|          | 1        | 3 israel      | Psycologist          |        | 0 3    |
|          | 1        | 4 israel      | Teacher              |        | 6 6    |
|          | 1        | 2 israel      | business Advicer     |        | 5 5    |
|          | 1        | 2 israel      | Manager              |        | 0 4    |
|          | 1        | 3 israel      | Engineer             |        | 0 2    |
|          | 1        | 3 israel      | Secretary            |        | 1 4    |
|          | 1        | 3 999         | pensioner            |        | 3 3    |
|          | 1        | 3 israel      | pensioner            |        | 4 2    |
|          | 1        | 1 israel      | account managing     |        | 1 5    |
|          | 1        | 2 israel      | account managing     |        | 0 6    |
| #NULL!   | #NULL!   |               |                      | #NULL! | #NULL! |
| #NULL!   | #NULL!   |               |                      | #NULL! | #NULL! |
| #NULL!   | #NULL!   |               |                      | #NULL! | #NULL! |
| #NULL!   | #NULL!   |               |                      | #NULL! | #NULL! |
|          | 1        | 3 israel      | biology teacher      |        | 5 2    |
|          | 1        | 2 israel      | teacher              |        | 0 3    |
|          | 1        | 2 germany     | agriculture & indust |        | 2 6    |
|          | 2        | 3 israel      | pensioner            |        | 2 6    |
|          | 1        | 4 israel      | pensioner            |        | 4 4    |
|          | 1        | 4 uruguay     | pedicure             |        | 0 6    |
|          | 1        | 2 israel      | events producer      |        | 0 1    |
|          | 3        | 5 israel      | private business     |        | 7 2    |
|          | 1        | 4 brazil      | quality assurance ma |        | 5 2    |
|          | 1        | -1 israel     | Macanic              |        | 2 5    |
|          | 1        | 2 israel      | security manager     |        | 6 3    |
|          | 1        | 4 israel      | account manager      |        | 4 2    |
|          | 1        | 3 israel      | education counsler   |        | 1 3    |
|          | 1        | 3 israel      | nurse                |        | 0 4    |
|          | 1        | 3 israel      | head secretery       |        | 1 6    |
|          | 1        | 5 israel      | pensioner            |        | 1 6    |
|          | 1        | 0 israel      | typist               |        | 0 6    |

|        |                        |                      |        |        |
|--------|------------------------|----------------------|--------|--------|
| 2      | 5 israel               | sewer                | 2      | 3      |
| 1      | 4 france               | teacher              | 2      | 1      |
| 1      | 1 argentina            | acquisitions manager | 1      | 3      |
| 1      | 4 people's republic of | 999                  | 3      | -1     |
| 1      | 2 israel               | pensioner            | 0      | 6      |
| 1      | 4 israel               | Secretary            | 9      | 5      |
| 1      | 4 switzerland          | accountant           | 3      | 6      |
| 1      | 4 china                | head of security     | 2      | 2      |
| 1      | 2 israel               | Writing              | 0      | 2      |
| 1      | 5 israel               | Sport teacher        | 9      | 6      |
| 1      | 4 israel               | Agriculture          | 9      | 2      |
| 1      | 4 israel               | Bookkeeping          | 3      | 2      |
| 1      | 4 israel               | Pension              | 4      | 3      |
| 1      | 4 israel               | Agriculture          | 1      | 3      |
| 1      | 3 israel               | accounting           | 4      | 3      |
| 1      | 3 israel               | Artist               | 1      | 3      |
| 1      | 4 israel               | self-employed        | 0      | 2      |
| 1      | 4 israel               | Graphic designer     | 4      | 3      |
| 1      | 2 russia               | telemarketing        | 6      | 4      |
| 1      | 3 israel               | office manage        | 1      | 3      |
| 1      | 2 israel               | bus driver           | 4      | 2      |
| 1      | 2 israel               | information systems  | 3      | 4      |
| 1      | 3 israel               | computer technician  | 0      | 2      |
| 1      | 2 israel               | 999                  | 0      | 4      |
| 1      | 2 israel               | teacher - pensioner  | 3      | 3      |
| 1      | 2 israel               | sales                | 3      | 3      |
| 1      | 2 israel               | teacher & counsultan | 1      | 4      |
| 1      | 1 israel               | spirtual teacher     | 1      | 6      |
| 1      | 4 germany              | architect engineer   | 1      | 4      |
| 1      | 2 israel               | visa coordinator     | 1      | 3      |
| 1      | 4 israel               | agricultural         | 4      | 4      |
| 1      | 3 israel               | maintaining heating  | 4      | 4      |
| 1      | 0 israel               | dance teacher        | 9      | 2      |
| 1      | 2 israel               | pedagogical secerta  | 2      | 4      |
| 1      | 3 argentina            | family doctor        | 1      | 2      |
| 1      | 3 israel               | occupational therapy | 2      | 5      |
| 1      | 2 israel               | marketing manager    | 0      | 4      |
| 1      | 2 israel               | teacher              | 2      | 3      |
| 1      | 2 israel               | software engineer    | 2      | 3      |
| 2      | 2 morocco              | senior account manag | 5      | 5      |
| 1      | 3 israel               | parking lot manager  | 1      | 3      |
| 1      | 3 uruguay              | Business manager     | 2      | 3      |
| 1      | 4 israel               | Science administrati | 3      | 3      |
| 1      | 1 israel               | Social worker        | 2      | 5      |
| 1      | 4 israel               | Bookkeeper           | 0      | 6      |
| 1      | 3 israel               | Software Engineer    | 4      | 6      |
| 1      | 3 israel               | Bookkeeper           | 2      | 5      |
| 1      | 3 israel               | assigning of strange | 3      | 3      |
| 1      | 3 israel               | housewife            | 2      | 2      |
| 1      | 3 israel               | self-employed        | 5      | 2      |
| 1      | 4 israel               | teacher              | 5      | 6      |
| 1      | 4 israel               | self-employed        | 1      | 2      |
| 1      | 1 iraq                 | Machine technician   | 5      | 2      |
| 1      | 2 israel               | Furniture Painting   | 6      | 4      |
| #NULL! | #NULL!                 |                      | #NULL! | #NULL! |
| 1      | 5 israel               | Nanny                | 2      | 2      |

|    |             |                      |   |    |
|----|-------------|----------------------|---|----|
| 1  | 2 france    | shoes designer       | 0 | 6  |
| 1  | 3 israel    | economist            | 6 | 5  |
| 1  | 3 romania   | culinary center mana | 1 | 4  |
| 1  | 0 israel    | engineer             | 0 | 4  |
| 1  | 2 israel    | 999                  | 4 | 4  |
| 1  | 2 germany   | administration       | 3 | 5  |
| 1  | 3 argentina | Industry and Managem | 2 | 3  |
| 1  | 1 israel    | cosmetician          | 2 | 2  |
| 1  | 1 israel    | optician             | 1 | 2  |
| 1  | 2 israel    | Department manager   | 1 | 5  |
| 1  | 4 israel    | Engineer             | 1 | 5  |
| 1  | 3 israel    | Natural medicine     | 6 | 3  |
| 2  | 4 israel    | Store manager        | 3 | 3  |
| 1  | 3 israel    | Machine engineer     | 1 | 3  |
| 2  | 2 israel    | Electronic engineer  | 6 | 5  |
| 1  | 3 israel    | bookkeeper           | 0 | 6  |
| 1  | 3 israel    | human resources      | 5 | 2  |
| 2  | 3 israel    | dietician            | 3 | 2  |
| 1  | 3 israel    | pensioner            | 4 | 3  |
| 1  | 3 israel    | librarian            | 4 | 3  |
| 1  | 3 israel    | nurse                | 1 | 5  |
| 1  | 1 israel    | sales and marketing  | 0 | 4  |
| 1  | 3 israel    | teacher              | 3 | 2  |
| 1  | 3 israel    | lawyer               | 4 | 2  |
| 1  | 3 israel    | flowers interweaving | 7 | 3  |
| 1  | 2 israel    | quality manager      | 0 | 4  |
| 2  | 4 israel    | investigator         | 7 | 4  |
| 1  | 3 romania   | nurse                | 0 | 6  |
| 1  | 3 israel    | pensioner            | 1 | 6  |
| 1  | 2 israel    | assistant            | 1 | 1  |
| 1  | 3 israel    | architect            | 4 | 1  |
| 1  | 3 israel    | industry and managem | 0 | 4  |
| 1  | 3 argentina | social worker        | 0 | 2  |
| 1  | 3 denmark   | systems analysis     | 2 | 3  |
| 1  | 4 israel    | 999                  | 5 | 5  |
| -1 | 4 israel    | teacher              | 5 | 5  |
| 1  | 3 israel    | 999                  | 6 | 3  |
| 1  | 2 israel    | export secretary     | 2 | 2  |
| 1  | 2 israel    | pediatrician         | 3 | -1 |
| 1  | 3 israel    | manager              | 1 | 2  |
| 1  | 4 israel    | acoount manager      | 0 | 4  |
| 1  | 4 israel    | 999                  | 0 | 3  |
| 1  | 5 israel    | movement instructor  | 1 | 2  |
| 1  | 3 israel    | lawyer, account mana | 5 | 6  |
| 2  | 3 israel    | education            | 7 | 3  |
| 1  | 3 israel    | biology teacher      | 2 | 3  |
| 1  | 1 israel    | graphic artist       | 0 | 6  |
| 1  | 2 france    | agricultural         | 6 | 5  |
| 1  | 3 poland    | Teacher              | 0 | 4  |
| 2  | 4 israel    | teacher              | 2 | 3  |
| 2  | 2 israel    | engineer             | 5 | 4  |
| 1  | 2 israel    | architect            | 3 | 3  |
| 1  | 2 israel    | language aditing     | 1 | 1  |
| 1  | 2 israel    | manager              | 7 | 4  |
| 1  | 2 israel    | human resources      | 3 | 2  |
| 1  | 2 israel    | social worker, speci | 0 | 4  |

|    |           |                      |   |    |
|----|-----------|----------------------|---|----|
| 1  | 2 israel  | Teacher              | 0 | 2  |
| 1  | 2 israel  | Interior Designer    | 3 | 3  |
| 1  | 2 england | Lufthansa manager    | 1 | 5  |
| 1  | 3 israel  | management and Educa | 1 | 6  |
| 1  | 3 israel  | insurance agent      | 1 | 4  |
| 1  | 2 999     | 999                  | 4 | 3  |
| 1  | 3 romania | Industry and Managem | 1 | 6  |
| 1  | 2 israel  | Holistic medicine    | 4 | 4  |
| 1  | 0 poland  | lawyer               | 1 | 4  |
| 1  | 3 romania | banking              | 9 | 3  |
| 1  | 5 israel  | nurse                | 4 | 3  |
| 1  | 2 israel  | computers            | 0 | 3  |
| 2  | 2 israel  | kindergarten teacher | 1 | 6  |
| 3  | 4 israel  | coordinator          | 0 | 4  |
| 1  | 3 israel  | lawyer               | 0 | 3  |
| 1  | 4 poland  | electronics engineer | 2 | 6  |
| 1  | 2 israel  | secretary            | 4 | 6  |
| 1  | 3 israel  | manager              | 9 | 2  |
| 1  | 3 israel  | manager              | 0 | 5  |
| 1  | 3 israel  | teacher guide        | 4 | 5  |
| -1 | 0 israel  | education            | 8 | 3  |
| 1  | 2 israel  | archivist            | 0 | 6  |
| 1  | 3 israel  | financial manager    | 2 | 2  |
| 1  | 3 israel  | software             | 3 | 3  |
| 1  | 2 israel  | pensioner            | 3 | 2  |
| 3  | 3 israel  | consultant, advisor  | 5 | 3  |
| 1  | 3 israel  | reflexology          | 2 | 3  |
| 1  | 2 latvia  | budget               | 2 | 3  |
| 1  | 4 israel  | kindergarten teacher | 1 | 6  |
| 1  | 2 israel  | lawyer               | 0 | 3  |
| 1  | 0 israel  | software engineer    | 0 | 5  |
| 1  | 2 israel  | veterinarian         | 1 | 5  |
| 1  | 2 israel  | agronomist           | 1 | 6  |
| 2  | 3 israel  | theacher             | 3 | 2  |
| 1  | 3 israel  | art metalworker      | 6 | 2  |
| -1 | 3 poland  | medical secretery    | 4 | 3  |
| 1  | 5 romania | economist            | 5 | 5  |
| 1  | 0 israel  | Bussiness managment  | 4 | 1  |
| 1  | 3 israel  | Basketball coach     | 3 | 5  |
| 1  | 3 israel  | teacher, educational | 1 | 6  |
| 2  | 4 israel  | education            | 4 | 3  |
| 1  | 3 israel  | pharmacist           | 2 | 2  |
| 1  | 0 israel  | secretary            | 1 | 6  |
| 2  | 5 israel  | teacher, secretary   | 7 | 2  |
| 1  | 1 poland  | practical engineer,  | 1 | -1 |
| 2  | 2 israel  | manager assistant    | 1 | 3  |
| 1  | 3 israel  | management           | 1 | 3  |
| 1  | 3 turkey  | technician           | 4 | 5  |
| 1  | 3 israel  | lawyer               | 4 | 3  |
| 1  | 1 israel  | Organizational consu | 0 | 6  |
| 1  | 2 chile   | secretary            | 1 | 5  |
| 1  | 2 israel  | Teacher              | 2 | 3  |
| 1  | 3 israel  | practical engineer,  | 4 | 3  |
| 2  | 1 israel  | self-employed        | 0 | 4  |
| 1  | 3 poland  | social worker        | 1 | 6  |
| 1  | 3 israel  | secretary            | 1 | 4  |

|    |              |                      |   |    |
|----|--------------|----------------------|---|----|
| 2  | 4 israel     | nurse                | 5 | 4  |
| 2  | 2 turkey     | secretary            | 4 | 4  |
| 1  | 3 russia     | electronic practical | 1 | 3  |
| 2  | 3 yugoslavia | Building practical e | 2 | 2  |
| 1  | 2 israel     | salaried employee    | 2 | 0  |
| 1  | 1 poland     | pensioner            | 2 | 6  |
| 1  | 5 poland     | Teacher              | 2 | 2  |
| 1  | 3 israel     | Engineer Advisor     | 3 | 3  |
| 1  | 2 romania    | teaching             | 2 | 6  |
| 2  | 3 israel     | bookkeeper           | 3 | 4  |
| 1  | 3 israel     | paralegal            | 5 | 4  |
| 1  | 3 israel     | pensioner            | 7 | 4  |
| 1  | 4 israel     | 999                  | 5 | 2  |
| 1  | 1 ussr       | journalist           | 0 | 4  |
| 3  | 6 israel     | computers            | 1 | 2  |
| 1  | 3 israel     | civilian engineer    | 0 | 2  |
| 1  | 3 iran       | communication        | 0 | 3  |
| 1  | 3 israel     | assistance manager   | 1 | 3  |
| 1  | 4 morocco    | policeman            | 5 | 6  |
| 1  | 2 israel     | self-employed        | 1 | 4  |
| 1  | 3 israel     | teaching             | 0 | 3  |
| 2  | 2 israel     | teacher              | 9 | 3  |
| 2  | 3 usa        | occupational therapi | 1 | 2  |
| 1  | 3 azerbaijan | 999                  | 0 | 6  |
| 2  | 6 israel     | housekeeper          | 1 | 2  |
| 1  | 4 romania    | housekeeper          | 4 | 2  |
| 1  | 2 israel     | computers            | 1 | 5  |
| 2  | 3 israel     | teacher              | 0 | 2  |
| 1  | 3 israel     | physiotherapist      | 4 | 6  |
| 1  | 3 burma      | preschool teacher    | 3 | 5  |
| 1  | 3 israel     | 999                  | 1 | 2  |
| 1  | 3 israel     | pensioner            | 4 | 3  |
| 1  | 2 germany    | social worker        | 3 | 6  |
| 1  | 2 israel     | quality engineer     | 3 | 4  |
| 2  | 5 israel     | insurance agent cons | 0 | 5  |
| 3  | 4 israel     | education            | 3 | 4  |
| 1  | 5 israel     | chemist              | 7 | -1 |
| 1  | 2 israel     | communication, books | 6 | 2  |
| 1  | 1 israel     | information manager  | 1 | 2  |
| 1  | 4 israel     | guidance             | 2 | 2  |
| 1  | 3 israel     | teacher              | 5 | 2  |
| -1 | 3 israel     | projects manager     | 1 | -1 |
| 1  | 3 holland    | Medical Secretary    | 4 | 5  |
| 1  | 3 canada     | nurse                | 0 | 6  |
| 1  | 3 hungary    | software technical s | 1 | 2  |
| 2  | 2 usa        | retired              | 0 | 6  |
| 1  | 3 israel     | nurse                | 4 | 3  |
| 1  | 3 poland     | manager              | 0 | 4  |
| -1 | 3 israel     | social worker        | 1 | 5  |
| 2  | 5 argentina  | education, research  | 1 | 2  |
| 1  | 2 romania    | consultant           | 3 | -1 |
| 2  | 2 usa        | teacher, discussion  | 1 | 6  |
| 1  | 3 israel     | pensioner            | 3 | 6  |
| 1  | 3 israel     | teacher              | 2 | 6  |
| 2  | 1 israel     | 999                  | 3 | 6  |
| 1  | 3 cyprus     | 999                  | 1 | 5  |



| waist  | hip    | weight | height | ds_soc1 | ds_neg1 | typed1 | NS1    |       |
|--------|--------|--------|--------|---------|---------|--------|--------|-------|
|        | 94     | 99     | 78     | 178     | 18.00   | 10.00  | 1.00   | 61.00 |
|        | 96     | 104    | 73     | 163     | 6.00    | 20.00  | 0.00   | 65.00 |
|        | 97     | 122    | 87     | 165     | 13.00   | 13.00  | 1.00   | 51.00 |
|        | 95     | 95     | 80     | 178     | 9.00    | 6.00   | 0.00   | 48.00 |
|        | 103    | 108    | 95     | 177     | 6.00    | 2.00   | 0.00   | 39.00 |
|        | 95     | 109    | 88     | 186     | 1.00    | 1.00   | 0.00   | 52.00 |
|        | 80     | 96     | 56     | 163     | 9.00    | 3.00   | 0.00   | 50.00 |
|        | 100    | 104    | 70     | 169     | 5.00    | 4.00   | 0.00   | 56.00 |
|        | 92     | 113    | 80     | 177     | 7.00    | 6.00   | 0.00   | 63.75 |
|        | 85     | 99     | 58     | 148     | 4.00    | 0.00   | 0.00   | 43.00 |
|        | 91     | 115    | 74     | 158     | 6.00    | 2.00   | 0.00   | 51.00 |
|        | 39     | 112    | 78     | 150     | 8.00    | 8.00   | 0.00   | 66.00 |
|        | 91     | 104    | 68     | 155     | 6.00    | 8.00   | 0.00   | 60.00 |
|        | 102    | 104    | 90     | 184     | 0.00    | 9.00   | 0.00   | 52.00 |
|        | 104    | 102    | 85     | 181     | 16.00   | 5.00   | 0.00   | 52.00 |
|        | 72     | 86     | 57     | 160     | 10.00   | 8.00   | 0.00   | 51.00 |
|        | 80     | 100    | 56     | 159     | 8.00    | 6.00   | 0.00   | 54.00 |
|        | 87     | 110    | 64     | 158     | 17.00   | 6.00   | 0.00   | 44.00 |
|        | 108    | 111    | 84     | 178     | 10.00   | 12.00  | 1.00   | 56.84 |
|        | 86     | 105    | 61     | 164     | 25.00   | 9.00   | 0.00   | 50.00 |
|        | 92     | 106    | 83     | 175     | 3.00    | 4.00   | 0.00   | 52.00 |
|        | 86     | 109    | 80     | 169     | 5.00    | 7.00   | 0.00   | 52.00 |
|        | 94     | 100    | 70     | 172     | 11.00   | 4.00   | 0.00   | 49.00 |
|        | 91     | 94     | 80     | 180     | 7.00    | 7.00   | 0.00   | 62.00 |
|        | 75     | 97     | 64     | 165     | 13.00   | 11.00  | 1.00   | 68.00 |
|        | 85     | 95     | 62     | 159     | 5.00    | 5.00   | 0.00   | 61.00 |
|        | 110    | 125    | 83     | 168     | 0.00    | 5.00   | 0.00   | 52.00 |
|        | 100    | 103    | 92     | 187     | 14.00   | 7.00   | 0.00   | 76.00 |
|        | 106    | 108    | 90     | 180     | 6.00    | 10.00  | 0.00   | 54.00 |
|        | 79     | 105    | 54     | 151     | 9.00    | 6.00   | 0.00   | 52.00 |
|        | 999    | 999    | 79     | 165     | 4.00    | 4.00   | 0.00   | 53.00 |
|        | 85     | 93     | 73     | 182     | 10.00   | 2.00   | 0.00   | 60.00 |
|        | 81     | 99     | 56     | 155     | 14.00   | 16.00  | 1.00   | 62.00 |
|        | 96     | 117    | 82     | 173     | 19.00   | 6.00   | 0.00   | 41.00 |
| #NULL! | #NULL! | #NULL! | #NULL! | #NULL!  | #NULL!  | #NULL! | #NULL! | 54.00 |
| #NULL! | #NULL! | #NULL! | #NULL! | #NULL!  | #NULL!  | #NULL! | #NULL! | 53.00 |
| #NULL! | #NULL! | #NULL! | #NULL! | #NULL!  | #NULL!  | #NULL! | #NULL! | 44.00 |
| #NULL! | #NULL! | #NULL! | #NULL! | #NULL!  | #NULL!  | #NULL! | #NULL! | 63.00 |
|        | 91     | 101    | 66     | 159     | 10.00   | 4.00   | 0.00   | 47.00 |
|        | 87     | 115    | 70     | 167     | 9.00    | 6.00   | 0.00   | 58.00 |
|        | 110    | 105    | 90     | 179     | 6.00    | 7.00   | 0.00   | 57.00 |
|        | 85     | 106    | 58     | 155     | 3.00    | 3.00   | 0.00   | 61.00 |
|        | 93     | 106    | 78     | 170     | 8.00    | 11.00  | 0.00   | 66.00 |
|        | 95     | 112    | 83     | 163     | 4.00    | 9.00   | 0.00   | 55.00 |
|        | 78     | 91     | 66     | 167     | 1.00    | 14.00  | 0.00   | 74.00 |
|        | 999    | 999    | 87     | 178     | 5.00    | 3.00   | 0.00   | 55.00 |
|        | 75     | 98     | 60     | 160     | 7.00    | 9.00   | 0.00   | 52.00 |
|        | 98     | 99     | 71     | 170     | 10.00   | 4.00   | 0.00   | 43.00 |
|        | 87     | 97     | 77     | 181     | 11.00   | 13.00  | 1.00   | 51.00 |
|        | 71     | 94     | 56     | 160     | 8.00    | 0.00   | 0.00   | 60.00 |
|        | 92     | 102    | 62     | 159     | 3.00    | 4.00   | 0.00   | 47.00 |
|        | 107    | 113    | 78     | 160     | 6.00    | 11.00  | 0.00   | 65.00 |
|        | 87     | 102    | 63     | 151     | 2.00    | 10.00  | 0.00   | 62.00 |
|        | 94     | 110    | 80     | 172     | 8.00    | 11.00  | 0.00   | 55.00 |
|        | 89     | 109    | 78     | 165     | 10.00   | 11.00  | 1.00   | 51.00 |

|        |        |        |        |        |        |        |        |
|--------|--------|--------|--------|--------|--------|--------|--------|
| 87     | 108    | 66     | 162    | 21.00  | 6.00   | 0.00   | 47.00  |
| 94     | 111    | 71     | 163    | 4.00   | 6.00   | 0.00   | 57.00  |
| 58     | 62     | 140    | 170    | 7.00   | 8.00   | 0.00   | 55.00  |
| 106    | 106    | 76     | 178    | 17.00  | 15.00  | 1.00   | 55.00  |
| 79     | 100    | 65     | 160    | 12.00  | 10.00  | 1.00   | 60.00  |
| 88     | 120    | 70     | 155    | 5.00   | 11.00  | 0.00   | 56.00  |
| 98     | 96     | 70     | 178    | 19.00  | 3.00   | 0.00   | 43.00  |
| 100    | 103    | 82     | 184    | 8.00   | 7.00   | 0.00   | 55.00  |
| 90     | 127    | 87     | 158    | 7.00   | 8.00   | 0.00   | 54.00  |
| 85     | 90     | 62     | 170    | 11.00  | 13.00  | 1.00   | 51.00  |
| 94     | 98     | 74     | 172    | 1.00   | 5.00   | 0.00   | 67.00  |
| 86     | 100    | 61     | 153    | 11.00  | 12.00  | 1.00   | 44.00  |
| 90     | 112    | 69     | 160    | 5.00   | 7.00   | 0.00   | 56.00  |
| 104    | 105    | 86     | 181    | 11.00  | 4.00   | 0.00   | 47.00  |
| 80     | 104    | 61     | 168    | 17.00  | 18.00  | 1.00   | 56.00  |
| 86     | 102    | 56     | 147    | 15.00  | 9.00   | 0.00   | 66.00  |
| 90     | 99     | 75     | 184    | 11.00  | 3.00   | 0.00   | 63.00  |
| 77     | 103    | 60     | 167    | 12.00  | 3.00   | 0.00   | 49.00  |
| 89     | 96     | 66     | 171    | 7.00   | 14.00  | 0.00   | 51.00  |
| 94     | 105    | 74     | 163    | 11.00  | 9.00   | 0.00   | 47.00  |
| 95     | 102    | 85     | 182    | 11.00  | 2.00   | 0.00   | 56.00  |
| 99     | 108    | 93     | 174    | 6.00   | 9.00   | 0.00   | 52.00  |
| 80     | 91     | 54     | 158    | 9.00   | 8.00   | 0.00   | 63.00  |
| 97     | 103    | 79     | 170    | 18.00  | 5.00   | 0.00   | 59.00  |
| 100    | 118    | 86     | 170    | 18.00  | 16.00  | 1.00   | 47.00  |
| 98     | 97     | 76     | 172    | 4.00   | 7.00   | 0.00   | 58.00  |
| 120    | 120    | 114    | 195    | 13.00  | 11.00  | 1.00   | 55.00  |
| 99     | 115    | 90     | 172    | 5.00   | 0.00   | 0.00   | 55.00  |
| 999    | 999    | 80     | 168    | 16.00  | 13.00  | 1.00   | 53.00  |
| 94     | 107    | 73     | 166    | 7.00   | 3.00   | 0.00   | 50.00  |
| 62     | 60     | 90     | 181    | 1.00   | 2.00   | 0.00   | 57.00  |
| 90     | 104    | 82     | 183    | 17.00  | 10.00  | 1.00   | 49.00  |
| 65     | 87     | 49     | 160    | 8.00   | 13.00  | 0.00   | 57.00  |
| 90     | 110    | 69     | 165    | 8.00   | 5.00   | 0.00   | 63.00  |
| 95     | 97     | 76     | 174    | 1.00   | 12.00  | 0.00   | 55.00  |
| 88     | 105    | 75     | 167    | 6.00   | 4.00   | 0.00   | 56.00  |
| 108    | 103    | 90     | 170    | 2.00   | 12.00  | 0.00   | 43.00  |
| 75     | 100    | 62     | 169    | 8.00   | 15.00  | 0.00   | 49.00  |
| 89     | 101    | 75     | 180    | 21.00  | 28.00  | 1.00   | 34.00  |
| 96     | 94     | 70     | 170    | 14.00  | 1.00   | 0.00   | 54.00  |
| 102    | 96     | 80     | 172    | 4.00   | 8.00   | 0.00   | 68.00  |
| 98     | 98     | 80     | 175    | 10.00  | 7.00   | 0.00   | 63.00  |
| 94     | 105    | 72     | 168    | 21.00  | 7.00   | 0.00   | 52.00  |
| 106    | 132    | 89     | 164    | 3.00   | 8.00   | 0.00   | 58.00  |
| 104    | 130    | 95     | 166    | 17.00  | 16.00  | 1.00   | 54.00  |
| 102    | 111    | 91     | 174    | 13.00  | 12.00  | 1.00   | 61.00  |
| 79     | 102    | 66     | 164    | 12.00  | 11.00  | 1.00   | 49.00  |
| 97     | 120    | 88     | 168    | 12.00  | 8.00   | 0.00   | 65.00  |
| 73     | 86     | 45     | 159    | 3.00   | 0.00   | 0.00   | 55.00  |
| 95     | 97     | 78     | 174    | 9.00   | 10.00  | 0.00   | 53.00  |
| 88     | 105    | 68     | 153    | 7.00   | 0.00   | 0.00   | 61.00  |
| 80     | 103    | 65     | 168    | 2.00   | 0.00   | 0.00   | 48.00  |
| 81     | 94     | 65     | 175    | 2.00   | 11.00  | 0.00   | 54.00  |
| 80     | 96     | 70     | 165    | 11.00  | 5.00   | 0.00   | 66.00  |
| #NULL! | #NULL! | #NULL! | #NULL! | #NULL! | #NULL! | #NULL! | #NULL! |
| 92     | 110    | 73     | 166    | 17.00  | 7.00   | 0.00   | 54.00  |



|     |     |     |     |       |       |      |       |
|-----|-----|-----|-----|-------|-------|------|-------|
| 94  | 113 | 70  | 160 | 1.00  | 12.00 | 0.00 | 63.00 |
| 92  | 99  | 79  | 180 | 8.00  | 8.00  | 0.00 | 48.00 |
| 110 | 116 | 97  | 180 | 7.00  | 5.00  | 0.00 | 51.00 |
| 87  | 96  | 67  | 168 | 21.00 | 9.00  | 0.00 | 42.00 |
| 80  | 98  | 56  | 174 | 7.00  | 8.00  | 0.00 | 60.00 |
| 86  | 104 | 65  | 155 | 11.00 | 4.00  | 0.00 | 48.00 |
| 98  | 103 | 80  | 176 | 7.00  | 5.00  | 0.00 | 54.74 |
| 73  | 96  | 51  | 154 | 3.00  | 5.00  | 0.00 | 69.00 |
| 91  | 102 | 75  | 182 | 7.00  | 12.00 | 0.00 | 62.00 |
| 77  | 101 | 60  | 161 | 21.00 | 12.00 | 1.00 | 52.00 |
| 115 | 115 | 110 | 185 | 13.00 | 3.00  | 0.00 | 62.00 |
| 77  | 94  | 48  | 154 | 15.00 | 16.00 | 1.00 | 58.00 |
| 99  | 103 | 85  | 185 | 11.00 | 8.00  | 0.00 | 46.00 |
| 102 | 105 | 89  | 174 | 0.00  | 5.00  | 0.00 | 59.00 |
| 95  | 105 | 84  | 188 | 15.00 | 4.00  | 0.00 | 53.00 |
| 128 | 116 | 100 | 170 | 16.00 | 14.00 | 1.00 | 56.00 |
| 92  | 116 | 85  | 172 | 0.00  | 4.00  | 0.00 | 67.00 |
| 90  | 100 | 78  | 165 | 4.00  | 6.00  | 0.00 | 64.00 |
| 87  | 94  | 68  | 168 | 13.00 | 3.00  | 0.00 | 49.00 |
| 81  | 102 | 68  | 163 | 11.00 | 12.00 | 1.00 | 60.00 |
| 82  | 99  | 63  | 168 | 11.00 | 10.00 | 1.00 | 65.00 |
| 96  | 96  | 75  | 174 | 8.00  | 8.00  | 0.00 | 50.00 |
| 78  | 100 | 55  | 158 | 16.00 | 15.00 | 1.00 | 47.00 |
| 102 | 102 | 85  | 172 | 9.00  | 9.00  | 0.00 | 61.00 |
| 82  | 99  | 64  | 165 | 19.00 | 10.00 | 1.00 | 58.00 |
| 87  | 100 | 70  | 174 | 19.00 | 12.00 | 1.00 | 60.00 |
| 97  | 52  | 72  | 170 | 4.00  | 5.00  | 0.00 | 68.00 |
| 102 | 113 | 74  | 159 | 9.00  | 18.00 | 0.00 | 55.00 |
| 90  | 106 | 73  | 162 | 14.00 | 0.00  | 0.00 | 62.00 |
| 85  | 107 | 74  | 178 | 16.00 | 15.00 | 1.00 | 46.00 |
| 81  | 105 | 74  | 172 | 9.00  | 13.00 | 0.00 | 55.00 |
| 95  | 110 | 75  | 163 | 1.00  | 3.00  | 0.00 | 52.00 |
| 91  | 112 | 69  | 167 | 11.00 | 11.00 | 1.00 | 57.00 |
| 85  | 113 | 74  | 175 | 15.00 | 5.00  | 0.00 | 51.00 |
| 96  | 100 | 77  | 172 | 11.00 | 12.00 | 1.00 | 57.00 |
| 84  | 100 | 64  | 162 | 13.00 | 3.00  | 0.00 | 48.00 |
| 84  | 99  | 56  | 170 | 4.00  | 3.00  | 0.00 | 41.00 |
| 81  | 98  | 62  | 170 | 17.00 | 16.00 | 1.00 | 50.00 |
| 97  | 98  | 80  | 180 | 19.00 | 8.00  | 0.00 | 46.00 |
| 93  | 104 | 75  | 175 | 10.00 | 6.00  | 0.00 | 51.00 |
| 105 | 101 | 86  | 178 | 9.00  | 8.00  | 0.00 | 61.00 |
| 71  | 96  | 58  | 172 | 11.00 | 18.00 | 1.00 | 59.00 |
| 77  | 96  | 60  | 177 | 12.00 | 21.00 | 1.00 | 67.00 |
| 79  | 92  | 57  | 173 | 12.00 | 12.00 | 1.00 | 50.00 |
| 74  | 100 | 57  | 160 | 8.00  | 5.00  | 0.00 | 50.00 |
| 82  | 98  | 58  | 154 | 15.00 | 10.00 | 1.00 | 44.00 |
| 81  | 107 | 74  | 178 | 8.00  | 15.00 | 0.00 | 66.00 |
| 66  | 63  | 52  | 150 | 4.00  | 4.00  | 0.00 | 47.00 |
| 100 | 120 | 92  | 165 | 8.00  | 12.00 | 0.00 | 58.00 |
| 102 | 117 | 76  | 160 | 6.00  | 5.00  | 0.00 | 64.00 |
| 99  | 107 | 84  | 179 | 7.00  | 4.00  | 0.00 | 65.00 |
| 90  | 95  | 63  | 169 | 11.00 | 13.00 | 1.00 | 56.00 |
| 68  | 103 | 64  | 165 | 1.00  | 2.00  | 0.00 | 56.00 |
| 99  | 106 | 90  | 186 | 12.00 | 3.00  | 0.00 | 49.00 |
| 98  | 97  | 75  | 172 | 9.00  | 16.00 | 0.00 | 51.00 |
| 75  | 88  | 52  | 158 | 5.00  | 13.00 | 0.00 | 59.00 |

|     |     |     |     |       |       |      |       |
|-----|-----|-----|-----|-------|-------|------|-------|
| 78  | 97  | 60  | 164 | 11.00 | 13.00 | 1.00 | 51.00 |
| 84  | 107 | 67  | 164 | 4.00  | 9.00  | 0.00 | 57.00 |
| 116 | 116 | 103 | 183 | 3.00  | 7.00  | 0.00 | 60.00 |
| 93  | 118 | 80  | 155 | 16.00 | 14.00 | 1.00 | 64.00 |
| 95  | 103 | 83  | 175 | 7.00  | 17.00 | 0.00 | 56.00 |
| 76  | 95  | 65  | 157 | 9.00  | 7.00  | 0.00 | 62.11 |
| 130 | 120 | 107 | 170 | 10.00 | 4.00  | 0.00 | 59.00 |
| 109 | 99  | 75  | 165 | 4.00  | 12.00 | 0.00 | 64.00 |
| 80  | 92  | 63  | 164 | 15.00 | 9.00  | 0.00 | 50.00 |
| 999 | 999 | 77  | 172 | 9.00  | 11.00 | 0.00 | 60.00 |
| 83  | 120 | 83  | 157 | 18.00 | 4.00  | 0.00 | 48.00 |
| 110 | 112 | 101 | 186 | 14.00 | 9.00  | 0.00 | 55.00 |
| 94  | 101 | 61  | 157 | 15.00 | 18.00 | 1.00 | 62.00 |
| 80  | 101 | 999 | 160 | 6.00  | 11.00 | 0.00 | 67.00 |
| 104 | 120 | 69  | 172 | 19.00 | 17.00 | 1.00 | 59.00 |
| 93  | 100 | 80  | 171 | 28.00 | 20.00 | 1.00 | 43.00 |
| 93  | 102 | 65  | 154 | 16.00 | 10.00 | 1.00 | 59.00 |
| 98  | 103 | 80  | 173 | 13.00 | 18.00 | 1.00 | 50.00 |
| 116 | 114 | 100 | 176 | 13.00 | 6.00  | 0.00 | 57.00 |
| 85  | 105 | 67  | 164 | 6.00  | 6.00  | 0.00 | 63.00 |
| 84  | 97  | 57  | 154 | 5.00  | 1.00  | 0.00 | 47.00 |
| 84  | 99  | 63  | 175 | 7.00  | 7.00  | 0.00 | 62.00 |
| 101 | 128 | 104 | 191 | 4.00  | 5.00  | 0.00 | 50.00 |
| 92  | 99  | 75  | 175 | 11.00 | 12.00 | 1.00 | 50.00 |
| 97  | 105 | 87  | 182 | 6.00  | 9.00  | 0.00 | 54.00 |
| 999 | 999 | 62  | 167 | 4.00  | 2.00  | 0.00 | 57.00 |
| 86  | 101 | 66  | 170 | 3.00  | 7.00  | 0.00 | 62.00 |
| 110 | 122 | 89  | 164 | 5.00  | 1.00  | 0.00 | 62.00 |
| 90  | 109 | 68  | 166 | 14.00 | 15.00 | 1.00 | 49.00 |
| 85  | 95  | 70  | 188 | 8.00  | 14.00 | 0.00 | 63.00 |
| 96  | 102 | 89  | 172 | 3.00  | 7.00  | 0.00 | 55.00 |
| 102 | 97  | 82  | 170 | 13.00 | 23.00 | 1.00 | 50.00 |
| 111 | 103 | 82  | 173 | 13.00 | 19.00 | 1.00 | 58.00 |
| 97  | 104 | 67  | 160 | 5.00  | 6.00  | 0.00 | 61.00 |
| 88  | 93  | 71  | 174 | 13.00 | 14.00 | 1.00 | 58.00 |
| 84  | 102 | 61  | 158 | 11.00 | 7.00  | 0.00 | 67.00 |
| 94  | 98  | 73  | 164 | 9.00  | 8.00  | 0.00 | 64.00 |
| 94  | 101 | 84  | 174 | 16.00 | 25.00 | 1.00 | 70.00 |
| 96  | 92  | 74  | 170 | 26.00 | 24.00 | 1.00 | 54.00 |
| 98  | 107 | 70  | 158 | 7.00  | 12.00 | 0.00 | 62.00 |
| 999 | 999 | 69  | 172 | 12.00 | 9.00  | 0.00 | 57.00 |
| 76  | 98  | 54  | 159 | 8.00  | 8.00  | 0.00 | 52.00 |
| 92  | 104 | 65  | 163 | 21.00 | 17.00 | 1.00 | 46.00 |
| 86  | 106 | 63  | 156 | 11.00 | 1.00  | 0.00 | 49.00 |
| 89  | 104 | 62  | 160 | 4.00  | 8.00  | 0.00 | 49.00 |
| 65  | 96  | 57  | 154 | 8.00  | 17.00 | 0.00 | 58.00 |
| 80  | 99  | 62  | 169 | 3.00  | 3.00  | 0.00 | 73.00 |
| 96  | 101 | 75  | 162 | 11.00 | 15.00 | 1.00 | 64.00 |
| 99  | 102 | 83  | 176 | 7.00  | 8.00  | 0.00 | 55.00 |
| 107 | 118 | 92  | 165 | 11.00 | 15.00 | 1.00 | 58.00 |
| 83  | 99  | 55  | 158 | 7.00  | 2.00  | 0.00 | 45.00 |
| 999 | 999 | 79  | 168 | 3.00  | 13.00 | 0.00 | 63.00 |
| 102 | 104 | 76  | 164 | 7.00  | 8.00  | 0.00 | 57.00 |
| 89  | 97  | 70  | 178 | 10.00 | 14.00 | 1.00 | 56.67 |
| 99  | 111 | 76  | 170 | 7.00  | 11.00 | 0.00 | 56.00 |
| 103 | 112 | 89  | 161 | 9.00  | 8.00  | 0.00 | 63.00 |

|     |     |     |     |       |       |      |       |
|-----|-----|-----|-----|-------|-------|------|-------|
| 96  | 105 | 73  | 160 | 17.00 | 20.00 | 1.00 | 55.00 |
| 95  | 100 | 72  | 164 | 1.00  | 5.00  | 0.00 | 59.00 |
| 95  | 97  | 90  | 175 | 14.00 | 9.00  | 0.00 | 53.00 |
| 110 | 104 | 90  | 179 | 6.00  | 10.00 | 0.00 | 56.00 |
| 99  | 94  | 80  | 179 | 14.00 | 13.00 | 1.00 | 52.00 |
| 86  | 100 | 63  | 163 | 16.00 | 12.00 | 1.00 | 47.37 |
| 80  | 104 | 65  | 164 | 5.00  | 1.00  | 0.00 | 54.00 |
| 136 | 124 | 120 | 180 | 9.00  | 6.00  | 0.00 | 51.00 |
| 105 | 108 | 86  | 163 | 9.00  | 11.00 | 0.00 | 59.00 |
| 108 | 119 | 87  | 157 | 11.00 | 10.00 | 1.00 | 60.00 |
| 96  | 112 | 86  | 163 | 0.00  | 15.00 | 0.00 | 58.00 |
| 102 | 97  | 73  | 169 | 14.00 | 6.00  | 0.00 | 46.00 |
| 96  | 99  | 77  | 184 | 15.00 | 2.00  | 0.00 | 51.00 |
| 62  | 98  | 70  | 999 | 17.00 | 9.00  | 0.00 | 48.00 |
| 107 | 103 | 88  | 180 | 11.00 | 13.00 | 1.00 | 53.00 |
| 127 | 123 | 118 | 178 | 13.00 | 8.00  | 0.00 | 65.00 |
| 60  | 95  | 50  | 157 | 12.00 | 24.00 | 1.00 | 58.00 |
| 99  | 106 | 93  | 190 | 15.00 | 7.00  | 0.00 | 60.00 |
| 94  | 98  | 60  | 155 | 5.00  | 19.00 | 0.00 | 52.00 |
| 64  | 102 | 73  | 169 | 7.00  | 0.00  | 0.00 | 64.00 |
| 70  | 88  | 59  | 163 | 1.00  | 8.00  | 0.00 | 55.00 |
| 83  | 100 | 65  | 158 | 1.00  | 1.00  | 0.00 | 57.00 |
| 91  | 107 | 77  | 173 | 7.00  | 8.00  | 0.00 | 58.00 |
| 88  | 103 | 61  | 155 | 7.00  | 12.00 | 0.00 | 69.00 |
| 97  | 126 | 88  | 159 | 4.00  | 8.00  | 0.00 | 50.00 |
| 90  | 104 | 68  | 165 | 21.00 | 20.00 | 1.00 | 53.00 |
| 77  | 89  | 59  | 170 | 16.00 | 7.00  | 0.00 | 49.00 |
| 110 | 133 | 101 | 156 | 11.00 | 13.00 | 1.00 | 51.00 |
| 79  | 103 | 57  | 172 | 11.00 | 9.00  | 0.00 | 49.00 |
| 83  | 106 | 64  | 157 | 9.00  | 10.00 | 0.00 | 57.00 |
| 99  | 104 | 69  | 154 | 22.00 | 16.00 | 1.00 | 54.00 |
| 108 | 106 | 89  | 180 | 1.00  | 8.00  | 0.00 | 64.00 |
| 88  | 108 | 67  | 160 | 8.00  | 13.00 | 0.00 | 68.00 |
| 100 | 95  | 72  | 173 | 5.00  | 6.00  | 0.00 | 49.00 |
| 98  | 105 | 86  | 181 | 8.00  | 5.00  | 0.00 | 68.00 |
| 95  | 112 | 68  | 163 | 3.00  | 10.00 | 0.00 | 53.00 |
| 96  | 97  | 73  | 178 | 9.00  | 2.00  | 0.00 | 50.00 |
| 87  | 115 | 70  | 170 | 2.00  | 3.00  | 0.00 | 62.00 |
| 78  | 101 | 62  | 161 | 5.00  | 9.00  | 0.00 | 52.00 |
| 81  | 103 | 66  | 162 | 8.00  | 2.00  | 0.00 | 68.00 |
| 102 | 108 | 73  | 155 | 12.00 | 4.00  | 0.00 | 48.00 |
| 108 | 107 | 80  | 168 | 17.00 | 11.00 | 1.00 | 41.00 |
| 86  | 100 | 60  | 164 | 11.00 | 16.00 | 1.00 | 54.74 |
| 105 | 125 | 80  | 165 | 8.00  | 1.00  | 0.00 | 62.00 |
| 100 | 104 | 82  | 180 | 10.00 | 16.00 | 1.00 | 50.00 |
| 27  | 37  | 50  | 153 | 6.00  | 6.00  | 0.00 | 44.00 |
| 67  | 92  | 51  | 151 | 12.00 | 7.00  | 0.00 | 47.00 |
| 93  | 97  | 67  | 163 | 9.00  | 2.00  | 0.00 | 64.00 |
| 80  | 95  | 56  | 158 | 16.00 | 7.00  | 0.00 | 48.00 |
| 80  | 104 | 60  | 159 | 12.00 | 10.00 | 1.00 | 53.00 |
| 81  | 109 | 73  | 162 | 3.00  | 3.00  | 0.00 | 64.00 |
| 81  | 102 | 60  | 165 | 9.00  | 12.00 | 0.00 | 69.33 |
| 106 | 116 | 88  | 180 | 10.00 | 8.00  | 0.00 | 62.11 |
| 85  | 96  | 52  | 160 | 18.00 | 9.00  | 0.00 | 57.00 |
| 103 | 108 | 80  | 172 | 21.00 | 18.00 | 1.00 | 55.00 |
| 76  | 96  | 53  | 158 | 18.00 | 3.00  | 0.00 | 50.00 |



| HA1   | RD1   | PS1   | SD1   | CO1   | ST1   | tas_total1 |
|-------|-------|-------|-------|-------|-------|------------|
| 38.00 | 62.11 | 65.00 | 86.00 | 75.00 | 32.00 | 1.65       |
| 80.00 | 81.00 | 64.00 | 56.00 | 88.00 | 58.00 | 1.70       |
| 64.00 | 56.00 | 63.00 | 73.00 | 79.00 | 35.00 | 1.55       |
| 50.00 | 66.00 | 73.00 | 72.00 | 67.00 | 49.00 | 16.00      |
| 38.00 | 41.00 | 75.00 | 84.00 | 74.00 | 26.00 | 1.61       |
| 36.00 | 74.74 | 76.00 | 90.00 | 87.00 | 39.00 | 1.20       |
| 48.00 | 71.00 | 76.00 | 90.00 | 81.00 | 39.00 | 1.21       |
| 39.00 | 60.00 | 86.00 | 87.00 | 67.00 | 25.00 | 1.45       |
| 53.33 | 80.00 | 53.00 | 78.67 | 49.00 | 28.00 | 1.70       |
| 47.00 | 81.00 | 67.00 | 76.00 | 76.00 | 52.00 | 12.00      |
| 54.00 | 65.26 | 59.00 | 83.00 | 83.00 | 33.00 | 1.05       |
| 52.00 | 69.00 | 58.00 | 86.00 | 78.00 | 41.00 | 1.32       |
| 45.00 | 84.00 | 72.00 | 68.00 | 86.00 | 59.00 | 1.35       |
| 38.00 | 63.00 | 84.00 | 76.00 | 74.00 | 45.00 | 1.63       |
| 51.00 | 57.00 | 71.00 | 64.00 | 65.00 | 45.00 | 2.15       |
| 51.00 | 63.00 | 64.00 | 78.00 | 74.00 | 40.00 | 1.85       |
| 43.00 | 72.00 | 68.00 | 80.00 | 76.00 | 49.00 | 1.70       |
| 66.00 | 65.00 | 36.00 | 90.00 | 83.00 | 18.00 | 1.33       |
| 51.00 | 61.11 | 63.00 | 54.74 | 63.00 | 32.00 | 1.75       |
| 67.00 | 51.00 | 62.00 | 70.00 | 80.00 | 28.00 | 2.83       |
| 31.00 | 59.00 | 68.00 | 81.00 | 74.00 | 23.00 | 1.40       |
| 36.00 | 57.00 | 65.00 | 76.00 | 84.00 | 48.00 | 0.65       |
| 46.00 | 59.00 | 76.00 | 81.00 | 74.00 | 34.00 | 1.45       |
| 42.00 | 48.00 | 65.00 | 77.00 | 69.00 | 26.00 | 2.20       |
| 56.00 | 64.00 | 62.00 | 71.00 | 78.00 | 26.00 | 1.65       |
| 56.00 | 74.00 | 55.00 | 82.00 | 79.00 | 35.00 | 1.35       |
| 46.00 | 74.00 | 92.00 | 72.00 | 64.00 | 37.00 | 1.20       |
| 64.00 | 75.00 | 70.00 | 72.00 | 79.00 | 43.00 | 1.45       |
| 40.00 | 62.00 | 66.00 | 80.00 | 69.00 | 33.00 | 1.65       |
| 42.00 | 66.00 | 64.00 | 83.00 | 82.00 | 43.00 | 0.60       |
| 55.00 | 74.00 | 55.00 | 77.00 | 77.00 | 31.00 | 1.85       |
| 45.00 | 64.00 | 58.00 | 90.00 | 84.00 | 18.00 | 1.40       |
| 71.00 | 65.00 | 52.00 | 64.00 | 69.00 | 28.00 | 1.60       |
| 45.00 | 57.00 | 77.00 | 80.00 | 73.00 | 18.00 | 2.17       |
| 51.00 | 79.00 | 70.00 | 81.00 | 82.00 | 56.00 | 1.45       |
| 32.00 | 64.00 | 73.00 | 95.00 | 89.00 | 46.00 | 1.15       |
| 78.00 | 72.00 | 46.00 | 65.00 | 81.00 | 38.00 | 1.85       |
| 51.00 | 72.00 | 76.00 | 75.00 | 72.00 | 38.00 | 2.45       |
| 56.00 | 71.00 | 67.00 | 86.00 | 84.00 | 39.00 | 1.15       |
| 53.00 | 69.00 | 56.00 | 71.58 | 86.00 | 54.00 | 1.65       |
| 41.00 | 69.00 | 71.00 | 88.00 | 81.00 | 33.00 | 1.61       |
| 53.00 | 77.00 | 61.00 | 74.00 | 74.00 | 46.00 | 1.25       |
| 60.00 | 81.00 | 62.00 | 78.00 | 74.00 | 32.00 | 1.30       |
| 48.00 | 86.00 | 72.00 | 79.00 | 77.00 | 35.00 | 0.90       |
| 48.00 | 75.00 | 77.00 | 64.00 | 85.00 | 59.00 | 1.75       |
| 31.00 | 75.00 | 92.00 | 76.00 | 66.00 | 44.00 | 1.35       |
| 50.00 | 74.00 | 63.00 | 87.00 | 83.00 | 42.00 | 1.35       |
| 47.00 | 68.00 | 73.00 | 83.00 | 76.00 | 34.00 | 1.75       |
| 35.00 | 71.00 | 90.00 | 84.00 | 76.00 | 39.00 | 1.50       |
| 28.00 | 43.00 | 70.00 | 90.00 | 60.00 | 25.00 | 0.75       |
| 31.00 | 70.00 | 81.00 | 79.00 | 91.00 | 37.00 | 0.95       |
| 58.00 | 69.00 | 58.00 | 59.00 | 77.00 | 26.00 | 2.45       |
| 52.00 | 87.00 | 62.00 | 82.00 | 84.00 | 44.00 | 1.45       |
| 56.00 | 68.00 | 72.00 | 82.00 | 79.00 | 60.00 | 1.45       |
| 57.00 | 64.00 | 63.00 | 71.00 | 74.00 | 31.00 | 1.45       |

|        |        |        |        |        |        |        |
|--------|--------|--------|--------|--------|--------|--------|
| 63.00  | 56.00  | 64.00  | 78.00  | 74.00  | 30.00  | 2.50   |
| 53.00  | 63.00  | 81.00  | 67.00  | 72.00  | 55.00  | 1.80   |
| 48.00  | 71.00  | 76.00  | 80.00  | 74.00  | 38.00  | 1.65   |
| 63.00  | 72.00  | 75.00  | 70.00  | 79.00  | 57.00  | 0.61   |
| 55.00  | 61.00  | 73.00  | 82.00  | 78.00  | 36.00  | 1.50   |
| 53.00  | 72.00  | 75.00  | 74.00  | 76.00  | 53.00  | 1.55   |
| 47.00  | 47.00  | 74.00  | 71.00  | 74.00  | 24.00  | 1.63   |
| 47.00  | 68.00  | 63.00  | 74.00  | 72.00  | 32.00  | 1.42   |
| 47.00  | 71.00  | 54.00  | 52.00  | 92.00  | 44.00  | 1.70   |
| 71.00  | 50.00  | 61.00  | 69.00  | 60.00  | 34.00  | 2.58   |
| 32.00  | 81.00  | 73.00  | 69.00  | 62.00  | 49.00  | 1.45   |
| 62.00  | 71.00  | 62.00  | 80.00  | 70.00  | 26.00  | 1.20   |
| 55.00  | 69.00  | 51.00  | 76.00  | 85.00  | 39.00  | 0.85   |
| 52.00  | 57.00  | 63.00  | 78.00  | 73.00  | 37.00  | 1.68   |
| 74.00  | 65.00  | 59.00  | 58.00  | 71.00  | 50.00  | 2.00   |
| 63.00  | 61.00  | 43.00  | 90.00  | 82.00  | 36.00  | 2.00   |
| 53.00  | 54.00  | 69.00  | 82.00  | 82.00  | 34.00  | 1.40   |
| 41.00  | 50.00  | 68.00  | 83.00  | 72.00  | 34.00  | 1.35   |
| 59.00  | 79.00  | 70.00  | 56.00  | 80.00  | 41.00  | 1.50   |
| 55.00  | 71.00  | 63.00  | 78.00  | 87.00  | 39.00  | 1.25   |
| 38.00  | 67.00  | 52.00  | 94.00  | 92.00  | 27.00  | 1.45   |
| 42.00  | 62.00  | 66.00  | 75.00  | 77.00  | 31.00  | 1.60   |
| 47.00  | 65.00  | 75.00  | 76.00  | 83.00  | 54.00  | 1.15   |
| 56.00  | 53.00  | 68.00  | 63.00  | 76.00  | 36.00  | 2.16   |
| 70.00  | 60.00  | 63.00  | 69.00  | 73.00  | 38.00  | 2.50   |
| 46.00  | 75.00  | 60.00  | 71.00  | 59.00  | 31.00  | 1.95   |
| 54.00  | 58.00  | 69.00  | 66.00  | 74.00  | 33.00  | 1.80   |
| 37.00  | 73.00  | 68.00  | 82.00  | 86.00  | 69.00  | 1.00   |
| 56.00  | 53.00  | 71.00  | 75.00  | 71.00  | 34.00  | 2.35   |
| 48.00  | 69.00  | 81.00  | 88.00  | 90.00  | 56.00  | 0.85   |
| 35.00  | 65.00  | 62.00  | 89.00  | 83.00  | 51.00  | 1.10   |
| 55.00  | 68.00  | 71.00  | 72.00  | 88.00  | 50.00  | 1.05   |
| 72.00  | 81.00  | 70.00  | 66.00  | 81.00  | 36.00  | 1.25   |
| 55.00  | 70.00  | 65.00  | 71.00  | 78.00  | 55.00  | 1.60   |
| 40.00  | 67.00  | 69.00  | 79.00  | 86.00  | 34.00  | 1.21   |
| 55.00  | 75.00  | 58.00  | 81.00  | 81.00  | 43.00  | 1.50   |
| 58.00  | 74.00  | 76.00  | 65.00  | 74.00  | 26.00  | 1.60   |
| 64.00  | 74.00  | 73.00  | 55.00  | 72.00  | 24.00  | 1.50   |
| 85.00  | 56.00  | 61.00  | 39.00  | 63.00  | 23.00  | 1.72   |
| 55.00  | 56.00  | 65.00  | 80.00  | 72.00  | 29.00  | 1.75   |
| 47.00  | 78.00  | 70.00  | 66.00  | 75.00  | 49.00  | 1.45   |
| 47.00  | 56.00  | 71.00  | 73.00  | 69.00  | 32.00  | 2.16   |
| 52.00  | 50.00  | 82.00  | 83.00  | 78.00  | 29.00  | 1.75   |
| 52.00  | 63.00  | 75.00  | 84.00  | 70.00  | 45.00  | 1.30   |
| 55.00  | 56.00  | 61.00  | 63.00  | 62.00  | 42.00  | 2.15   |
| 46.00  | 54.00  | 60.00  | 77.00  | 78.00  | 32.00  | 1.55   |
| 70.00  | 62.00  | 72.00  | 70.00  | 72.00  | 43.00  | 1.80   |
| 54.00  | 67.00  | 63.00  | 59.00  | 74.00  | 39.00  | 2.00   |
| 42.00  | 70.00  | 73.00  | 79.00  | 73.00  | 47.00  | 1.05   |
| 62.00  | 61.00  | 47.00  | 60.00  | 73.00  | 34.00  | 2.20   |
| 42.00  | 57.00  | 69.00  | 80.00  | 68.00  | 20.00  | 1.15   |
| 33.00  | 70.00  | 79.00  | 79.00  | 85.00  | 30.00  | 1.10   |
| 49.00  | 88.00  | 84.00  | 80.00  | 86.00  | 34.00  | 1.90   |
| 43.00  | 68.00  | 60.00  | 78.00  | 88.00  | 46.00  | 2.26   |
| #NULL! | #NULL! | #NULL! | #NULL! | #NULL! | #NULL! | #NULL! |
| 57.00  | 66.00  | 50.00  | 63.00  | 78.00  | 41.00  | 1.58   |

|       |       |       |       |       |       |      |
|-------|-------|-------|-------|-------|-------|------|
| 52.00 | 70.00 | 73.00 | 56.84 | 70.00 | 66.00 | 1.50 |
| 47.00 | 55.00 | 65.00 | 82.00 | 76.00 | 24.00 | 1.65 |
| 59.00 | 74.00 | 60.00 | 67.37 | 73.00 | 41.00 | 1.10 |
| 54.00 | 46.00 | 62.00 | 76.00 | 65.00 | 24.00 | 1.80 |
| 44.00 | 69.00 | 53.00 | 74.00 | 68.00 | 37.00 | 0.90 |
| 56.00 | 58.00 | 63.00 | 78.00 | 78.00 | 45.00 | 1.55 |
| 47.37 | 57.00 | 65.00 | 84.21 | 82.00 | 21.00 | 2.41 |
| 34.00 | 78.00 | 47.00 | 79.00 | 86.00 | 38.00 | 1.35 |
| 48.00 | 63.00 | 85.00 | 76.00 | 72.00 | 28.00 | 2.55 |
| 62.00 | 45.00 | 61.00 | 74.00 | 77.00 | 31.00 | 1.65 |
| 40.00 | 67.00 | 72.00 | 75.00 | 76.00 | 35.00 | 1.35 |
| 61.00 | 63.00 | 60.00 | 68.00 | 74.00 | 34.00 | 2.00 |
| 49.00 | 58.00 | 67.00 | 69.00 | 66.00 | 28.00 | 2.15 |
| 44.00 | 72.00 | 77.00 | 77.00 | 77.00 | 29.00 | 1.45 |
| 55.00 | 68.00 | 69.00 | 73.00 | 76.00 | 51.00 | 1.40 |
| 69.00 | 60.00 | 68.00 | 61.00 | 62.00 | 41.00 | 2.60 |
| 32.00 | 82.00 | 68.00 | 59.00 | 77.00 | 24.00 | 1.75 |
| 50.00 | 83.00 | 53.00 | 80.00 | 87.00 | 56.00 | 0.65 |
| 50.00 | 54.00 | 55.00 | 69.00 | 75.00 | 41.00 | 1.40 |
| 51.00 | 76.00 | 73.00 | 68.00 | 68.00 | 47.00 | 2.00 |
| 52.00 | 62.00 | 65.00 | 76.00 | 70.00 | 53.00 | 1.45 |
| 61.00 | 56.00 | 64.00 | 76.00 | 69.00 | 28.00 | 1.37 |
| 61.00 | 67.00 | 58.00 | 73.00 | 79.00 | 35.00 | 1.60 |
| 38.00 | 64.00 | 70.00 | 79.00 | 67.00 | 31.00 | 2.39 |
| 66.00 | 67.00 | 82.00 | 76.00 | 81.00 | 35.00 | 1.84 |
| 65.00 | 53.00 | 68.00 | 60.00 | 76.00 | 23.00 | 1.65 |
| 37.00 | 76.00 | 71.00 | 95.00 | 94.00 | 59.00 | 0.95 |
| 59.00 | 77.00 | 79.00 | 59.00 | 85.00 | 24.00 | 1.10 |
| 55.00 | 60.00 | 70.00 | 83.00 | 71.00 | 40.00 | 1.20 |
| 72.00 | 62.00 | 55.00 | 61.00 | 72.00 | 45.00 | 1.50 |
| 50.00 | 64.00 | 74.00 | 63.00 | 66.00 | 28.00 | 1.50 |
| 27.00 | 78.00 | 88.00 | 97.00 | 81.00 | 21.00 | 1.90 |
| 63.16 | 67.00 | 61.00 | 70.00 | 74.00 | 41.00 | 2.00 |
| 65.00 | 67.00 | 60.00 | 69.00 | 74.00 | 42.00 | 1.75 |
| 67.00 | 65.00 | 54.00 | 64.00 | 71.00 | 33.00 | 2.53 |
| 50.00 | 56.00 | 65.00 | 90.00 | 81.00 | 47.00 | 1.80 |
| 48.00 | 70.00 | 80.00 | 91.00 | 82.00 | 18.00 | 1.15 |
| 68.00 | 64.00 | 71.00 | 63.00 | 76.00 | 50.00 | 1.25 |
| 58.00 | 56.00 | 69.00 | 74.00 | 74.00 | 26.00 | 1.80 |
| 52.00 | 53.00 | 70.00 | 75.00 | 69.00 | 44.00 | 2.20 |
| 39.00 | 65.00 | 54.00 | 71.00 | 78.00 | 54.00 | 1.58 |
| 73.68 | 61.00 | 54.00 | 63.00 | 64.00 | 33.00 | 1.05 |
| 64.21 | 64.00 | 60.00 | 47.00 | 74.00 | 44.00 | 1.90 |
| 65.00 | 67.00 | 57.00 | 74.00 | 69.00 | 42.00 | 1.60 |
| 50.00 | 57.00 | 70.00 | 80.00 | 68.00 | 53.00 | 1.70 |
| 61.00 | 69.00 | 66.00 | 83.00 | 83.00 | 23.00 | 0.90 |
| 61.00 | 72.00 | 60.00 | 69.00 | 79.00 | 40.00 | 2.10 |
| 47.00 | 53.00 | 68.00 | 79.00 | 85.00 | 46.00 | 1.30 |
| 54.00 | 78.00 | 71.00 | 73.00 | 83.00 | 49.00 | 1.85 |
| 43.00 | 73.00 | 59.00 | 75.00 | 79.00 | 57.00 | 1.85 |
| 42.00 | 67.00 | 62.00 | 82.00 | 77.00 | 45.00 | 1.95 |
| 62.11 | 64.00 | 54.00 | 62.00 | 64.00 | 34.00 | 1.95 |
| 30.00 | 75.00 | 60.00 | 85.00 | 89.00 | 32.00 | 0.80 |
| 42.00 | 72.00 | 77.00 | 78.00 | 77.00 | 40.00 | 2.00 |
| 54.00 | 61.00 | 79.00 | 67.00 | 82.00 | 24.00 | 1.70 |
| 52.00 | 74.00 | 52.00 | 64.00 | 84.00 | 50.00 | 0.90 |

|       |       |       |       |       |       |       |
|-------|-------|-------|-------|-------|-------|-------|
| 59.00 | 67.00 | 65.00 | 61.00 | 78.00 | 38.00 | 24.00 |
| 44.00 | 82.00 | 82.00 | 83.00 | 72.00 | 52.00 | 1.70  |
| 35.00 | 71.00 | 82.00 | 82.00 | 90.00 | 43.00 | 1.45  |
| 75.00 | 67.00 | 63.00 | 58.00 | 75.00 | 44.00 | 1.85  |
| 55.79 | 75.00 | 78.00 | 70.00 | 67.00 | 46.00 | 2.10  |
| 55.00 | 63.00 | 59.00 | 70.00 | 86.00 | 51.00 | 0.85  |
| 49.00 | 66.00 | 72.00 | 79.00 | 84.00 | 53.00 | 1.30  |
| 47.00 | 75.00 | 59.00 | 59.00 | 77.00 | 53.00 | 1.55  |
| 48.00 | 46.00 | 80.00 | 83.00 | 59.00 | 18.00 | 1.68  |
| 48.00 | 72.00 | 74.00 | 79.00 | 72.00 | 37.00 | 1.90  |
| 61.00 | 81.00 | 62.00 | 56.00 | 76.00 | 48.00 | 1.25  |
| 52.00 | 73.00 | 76.00 | 57.00 | 77.00 | 46.00 | 1.45  |
| 65.00 | 75.00 | 84.00 | 75.00 | 79.00 | 47.00 | 2.47  |
| 64.00 | 71.00 | 70.00 | 61.00 | 73.00 | 45.00 | 1.85  |
| 82.00 | 57.00 | 45.00 | 46.00 | 59.00 | 42.00 | 2.40  |
| 74.00 | 52.00 | 29.00 | 36.00 | 59.00 | 26.00 | 1.85  |
| 64.00 | 57.00 | 56.00 | 60.00 | 68.00 | 37.00 | 1.75  |
| 53.00 | 62.00 | 86.00 | 72.00 | 78.00 | 33.00 | 1.05  |
| 40.00 | 60.00 | 75.00 | 61.00 | 79.00 | 47.00 | 1.40  |
| 39.00 | 59.00 | 71.00 | 79.00 | 77.00 | 42.00 | 1.05  |
| 35.00 | 67.00 | 82.00 | 95.00 | 89.00 | 38.00 | 1.05  |
| 48.00 | 68.00 | 71.00 | 74.00 | 74.00 | 43.00 | 1.75  |
| 33.00 | 62.00 | 83.00 | 90.00 | 79.00 | 21.00 | 1.90  |
| 63.00 | 68.00 | 72.00 | 77.00 | 82.00 | 40.00 | 1.80  |
| 40.00 | 68.00 | 73.00 | 82.00 | 73.00 | 36.00 | 1.75  |
| 43.00 | 61.00 | 60.00 | 87.00 | 75.00 | 72.00 | 0.74  |
| 43.00 | 75.00 | 64.00 | 81.00 | 79.00 | 62.00 | 1.20  |
| 43.00 | 74.00 | 58.00 | 93.00 | 84.00 | 53.00 | 1.05  |
| 77.00 | 68.00 | 61.00 | 71.00 | 75.00 | 53.00 | 2.25  |
| 39.00 | 66.00 | 79.00 | 70.00 | 86.00 | 48.00 | 1.45  |
| 39.00 | 69.00 | 84.00 | 73.00 | 71.00 | 54.00 | 1.60  |
| 68.00 | 53.00 | 70.00 | 73.00 | 78.00 | 49.00 | 1.95  |
| 52.00 | 48.00 | 67.00 | 64.00 | 70.00 | 31.00 | 2.15  |
| 32.00 | 82.00 | 76.00 | 92.00 | 89.00 | 35.00 | 1.25  |
| 56.00 | 65.00 | 52.00 | 54.00 | 79.00 | 33.00 | 1.72  |
| 55.00 | 66.00 | 62.00 | 62.00 | 74.00 | 62.00 | 1.60  |
| 57.00 | 61.00 | 65.00 | 67.00 | 65.00 | 31.00 | 1.95  |
| 68.00 | 67.00 | 55.00 | 33.00 | 79.00 | 44.00 | 2.30  |
| 70.00 | 46.00 | 73.00 | 55.00 | 68.00 | 32.00 | 2.72  |
| 48.00 | 72.00 | 52.00 | 72.00 | 89.00 | 53.00 | 1.10  |
| 51.00 | 55.00 | 69.00 | 73.00 | 73.00 | 37.00 | 1.80  |
| 50.00 | 69.00 | 61.00 | 76.00 | 79.00 | 33.00 | 1.75  |
| 59.00 | 53.00 | 47.00 | 51.00 | 66.00 | 24.00 | 1.74  |
| 45.00 | 66.00 | 66.00 | 81.00 | 82.00 | 49.00 | 1.40  |
| 55.00 | 73.00 | 70.00 | 71.58 | 77.00 | 44.00 | 1.35  |
| 71.00 | 69.00 | 68.00 | 70.00 | 79.00 | 34.00 | 1.55  |
| 49.00 | 73.00 | 74.00 | 87.00 | 86.00 | 48.00 | 1.05  |
| 60.00 | 68.00 | 44.00 | 72.00 | 71.00 | 30.00 | 1.74  |
| 46.00 | 68.00 | 66.00 | 77.00 | 80.00 | 43.00 | 1.50  |
| 66.00 | 49.00 | 64.00 | 59.00 | 78.00 | 64.00 | 1.17  |
| 46.00 | 80.00 | 73.00 | 83.00 | 81.00 | 39.00 | 1.05  |
| 54.00 | 67.00 | 78.00 | 56.00 | 70.00 | 55.00 | 2.50  |
| 46.00 | 70.00 | 72.00 | 74.00 | 73.00 | 34.00 | 1.95  |
| 74.00 | 56.00 | 58.00 | 48.00 | 66.00 | 23.00 | 1.75  |
| 47.00 | 78.00 | 73.00 | 83.00 | 84.00 | 44.00 | 0.75  |
| 57.00 | 69.00 | 68.00 | 61.00 | 63.00 | 33.00 | 1.75  |



|       |       |       |       |       |       |      |
|-------|-------|-------|-------|-------|-------|------|
| 68.00 | 71.00 | 63.00 | 54.00 | 59.00 | 40.00 | 2.35 |
| 43.00 | 87.00 | 69.00 | 77.00 | 83.00 | 56.00 | 1.15 |
| 56.00 | 61.00 | 57.00 | 67.00 | 71.00 | 32.00 | 2.00 |
| 52.00 | 67.00 | 75.00 | 68.00 | 67.00 | 48.00 | 1.80 |
| 65.00 | 68.00 | 53.00 | 60.00 | 69.00 | 37.00 | 1.90 |
| 60.00 | 54.00 | 71.00 | 76.00 | 67.00 | 28.00 | 1.72 |
| 37.00 | 79.00 | 87.00 | 81.00 | 86.00 | 54.00 | 0.68 |
| 40.00 | 48.00 | 88.00 | 81.00 | 79.00 | 27.00 | 1.55 |
| 62.00 | 74.00 | 49.00 | 75.00 | 78.00 | 41.00 | 1.40 |
| 65.00 | 61.00 | 61.00 | 66.00 | 69.00 | 38.00 | 2.10 |
| 37.00 | 67.00 | 74.00 | 74.00 | 81.00 | 43.00 | 2.05 |
| 55.00 | 49.00 | 75.00 | 79.00 | 74.00 | 36.00 | 1.55 |
| 45.00 | 69.00 | 76.00 | 74.00 | 74.00 | 53.00 | 1.35 |
| 74.00 | 67.00 | 61.00 | 66.00 | 67.00 | 30.00 | 1.80 |
| 59.00 | 66.00 | 59.00 | 68.00 | 74.00 | 50.00 | 2.20 |
| 52.00 | 57.00 | 67.00 | 78.00 | 70.00 | 29.00 | 1.85 |
| 74.74 | 73.68 | 66.00 | 51.58 | 74.00 | 45.00 | 2.10 |
| 49.00 | 54.00 | 78.00 | 69.00 | 78.00 | 40.00 | 2.10 |
| 58.00 | 73.00 | 73.00 | 48.00 | 70.00 | 57.00 | 1.63 |
| 31.00 | 69.00 | 61.00 | 80.00 | 86.00 | 46.00 | 1.05 |
| 44.00 | 67.00 | 69.00 | 72.00 | 79.00 | 32.00 | 1.75 |
| 32.00 | 72.00 | 75.00 | 94.00 | 91.00 | 71.00 | 1.45 |
| 65.00 | 78.00 | 53.00 | 59.00 | 82.00 | 53.00 | 1.60 |
| 41.00 | 74.00 | 76.00 | 52.00 | 63.00 | 59.00 | 2.45 |
| 46.00 | 68.00 | 62.00 | 77.00 | 82.00 | 59.00 | 1.90 |
| 78.00 | 49.00 | 60.00 | 50.00 | 68.00 | 27.00 | 3.00 |
| 58.00 | 56.00 | 70.00 | 73.00 | 71.00 | 35.00 | 2.05 |
| 64.00 | 66.00 | 72.00 | 79.00 | 90.00 | 39.00 | 1.25 |
| 69.00 | 61.00 | 62.00 | 67.00 | 72.00 | 31.00 | 1.50 |
| 52.00 | 62.00 | 63.00 | 80.00 | 80.00 | 55.00 | 1.85 |
| 75.00 | 71.00 | 66.00 | 58.00 | 70.00 | 37.00 | 2.50 |
| 38.00 | 78.00 | 93.00 | 78.00 | 76.00 | 59.00 | 1.05 |
| 47.00 | 66.00 | 74.00 | 72.00 | 73.00 | 43.00 | 1.55 |
| 46.00 | 68.00 | 69.00 | 64.00 | 79.00 | 44.00 | 1.85 |
| 52.00 | 70.00 | 72.00 | 78.00 | 78.00 | 43.00 | 1.05 |
| 57.00 | 70.00 | 55.00 | 80.00 | 58.00 | 45.00 | 1.80 |
| 50.00 | 50.00 | 64.00 | 77.00 | 68.00 | 28.00 | 1.79 |
| 50.00 | 67.00 | 67.00 | 80.00 | 82.00 | 58.00 | 1.25 |
| 61.00 | 73.00 | 63.00 | 72.00 | 76.00 | 27.00 | 1.55 |
| 45.00 | 70.00 | 67.00 | 80.00 | 86.00 | 52.00 | 1.60 |
| 43.00 | 65.00 | 82.00 | 89.00 | 86.00 | 40.00 | 1.26 |
| 60.00 | 59.00 | 70.00 | 73.00 | 82.00 | 46.00 | 2.65 |
| 41.00 | 78.00 | 79.00 | 75.00 | 79.00 | 36.00 | 2.35 |
| 44.00 | 61.00 | 57.00 | 77.00 | 84.00 | 48.00 | 1.70 |
| 50.00 | 70.00 | 75.00 | 78.00 | 68.00 | 37.00 | 1.90 |
| 57.00 | 71.00 | 72.00 | 68.00 | 73.00 | 46.00 | 2.15 |
| 61.05 | 67.00 | 62.00 | 70.00 | 80.00 | 33.00 | 1.60 |
| 43.00 | 58.00 | 74.00 | 82.00 | 83.00 | 32.00 | 1.60 |
| 60.00 | 67.00 | 53.00 | 75.00 | 85.00 | 48.00 | 1.55 |
| 52.00 | 68.00 | 70.00 | 72.00 | 78.00 | 53.00 | 1.20 |
| 44.00 | 68.00 | 63.00 | 75.00 | 75.00 | 30.00 | 1.35 |
| 71.43 | 76.67 | 44.00 | 61.25 | 68.00 | 50.00 | 1.65 |
| 56.00 | 52.00 | 63.00 | 68.00 | 65.00 | 46.00 | 2.15 |
| 65.00 | 68.00 | 37.00 | 63.00 | 71.00 | 43.00 | 2.20 |
| 82.00 | 64.00 | 37.00 | 33.00 | 58.00 | 44.00 | 2.65 |
| 59.00 | 62.00 | 59.00 | 80.00 | 88.00 | 20.00 | 1.65 |



| tas_identify1 | tas_describe1 | tas_external1 | npanas1 | ppanas1 | well_being1 | social_support1 |
|---------------|---------------|---------------|---------|---------|-------------|-----------------|
| 0.33          | 1.80          | 2.75          | 21.00   | 39.00   | 27.00       | 49.00           |
| 1.17          | 2.00          | 2.00          | 32.00   | 41.00   | 25.00       | 66.00           |
| 0.67          | 1.60          | 2.13          | 25.00   | 37.00   | 21.00       | 65.00           |
| 4.00          | 5.00          | 7.00          | 19.00   | 41.00   | 32.00       | 61.00           |
| 0.33          | 1.80          | 3.00          | 19.00   | 38.00   | 27.00       | 53.00           |
| 0.00          | 0.40          | 2.75          | 16.00   | 40.00   | 34.00       | 70.00           |
| 0.00          | 1.20          | 2.43          | 23.00   | 40.00   | 24.00       | 63.00           |
| 0.50          | 1.40          | 2.38          | 25.00   | 42.00   | 27.00       | 67.00           |
| 1.00          | 1.40          | 2.50          | 19.00   | 42.00   | 29.00       | 50.00           |
| 1.00          | 1.00          | 10.00         | 13.00   | 29.00   | 35.00       | 53.00           |
| 0.17          | 0.80          | 2.00          | 21.00   | 37.00   | 12.00       | 52.00           |
| 0.33          | 1.00          | 2.38          | 21.00   | 38.00   | 23.00       | 61.00           |
| 0.83          | 1.60          | 1.75          | 21.00   | 47.00   | 27.00       | 70.00           |
| 1.00          | 1.40          | 2.43          | 23.00   | 43.00   | 30.00       | #NULL!          |
| 1.83          | 2.00          | 2.63          | 15.00   | 31.00   | 26.00       | 45.00           |
| 1.33          | 1.80          | 2.38          | 21.00   | 37.00   | 30.00       | 64.00           |
| 0.83          | 1.80          | 2.38          | 23.00   | 42.00   | 29.00       | 64.00           |
| 0.17          | 1.75          | 2.29          | 13.00   | 25.00   | 23.00       | 50.00           |
| 0.80          | 1.00          | 3.00          | 29.00   | 34.00   | 23.00       | 62.00           |
| 2.50          | 2.75          | 3.29          | 20.00   | 27.00   | 25.00       | 49.00           |
| 0.00          | 1.40          | 2.63          | 19.00   | 44.00   | 29.00       | 63.00           |
| 0.17          | 0.60          | 1.13          | 23.00   | 44.00   | 12.00       | 54.00           |
| 0.50          | 1.60          | 2.25          | 20.00   | 39.00   | 29.00       | 51.00           |
| 1.17          | 2.00          | 3.13          | 19.00   | 38.00   | 17.00       | 56.00           |
| 1.33          | 1.80          | 1.88          | 28.00   | 44.00   | 28.00       | 56.00           |
| 0.67          | 1.40          | 1.88          | 21.00   | 40.00   | 27.00       | 57.00           |
| 0.00          | 1.00          | 2.38          | 20.00   | 37.00   | 11.00       | 70.00           |
| 0.50          | 0.80          | 2.63          | 21.00   | 39.00   | 25.00       | 58.00           |
| 0.33          | 2.00          | 2.50          | 19.00   | 38.00   | 29.00       | 64.00           |
| 0.00          | 0.60          | 1.13          | 18.00   | 42.00   | 35.00       | 65.00           |
| 0.83          | 1.80          | 2.75          | 17.00   | 38.00   | 34.00       | 63.00           |
| 0.00          | 1.20          | 2.38          | 14.00   | 34.00   | 32.00       | 64.00           |
| 1.00          | 1.20          | 2.25          | 22.00   | 32.00   | 20.00       | 54.00           |
| 1.17          | 2.40          | 3.33          | 18.00   | 34.00   | 29.00       | 59.00           |
| 0.67          | 1.20          | 2.38          | #NULL!  | #NULL!  | #NULL!      | #NULL!          |
| 0.00          | 2.40          | 1.38          | #NULL!  | #NULL!  | #NULL!      | #NULL!          |
| 1.00          | 2.80          | 2.00          | #NULL!  | #NULL!  | #NULL!      | #NULL!          |
| 2.50          | 1.80          | 2.75          | #NULL!  | #NULL!  | #NULL!      | #NULL!          |
| 0.50          | 1.40          | 1.63          | 16.00   | 38.00   | 32.00       | 67.00           |
| 1.00          | 1.60          | 2.25          | 22.00   | 41.00   | 17.00       | 48.00           |
| 0.83          | 1.50          | 2.57          | 14.00   | 34.00   | 25.00       | 28.00           |
| 0.50          | 1.60          | 1.75          | 17.00   | 35.00   | 25.00       | 54.00           |
| 1.17          | 0.80          | 1.88          | 22.00   | 37.00   | 25.00       | 59.00           |
| 0.00          | 0.60          | 1.88          | 21.00   | 40.00   | 23.00       | 52.00           |
| 2.33          | 0.80          | 2.00          | 25.00   | 44.00   | 24.00       | #NULL!          |
| 0.67          | 0.60          | 2.50          | 18.00   | 47.00   | 29.00       | 65.00           |
| 0.83          | 1.00          | 2.00          | 16.00   | 44.00   | 30.00       | 69.00           |
| 1.00          | 1.40          | 2.63          | 18.00   | 37.00   | 27.00       | 63.00           |
| 1.00          | 1.60          | 2.00          | 25.00   | 42.00   | 35.00       | 70.00           |
| 0.17          | 1.00          | 1.00          | 19.00   | 42.00   | 35.00       | 59.00           |
| 0.50          | 0.80          | 1.50          | 19.00   | 45.00   | 30.00       | 57.00           |
| 1.33          | 2.60          | 3.13          | 25.00   | 35.00   | 23.00       | 67.00           |
| 1.33          | 1.20          | 1.75          | 24.00   | 38.00   | 15.00       | 70.00           |
| 1.67          | 1.00          | 1.63          | 30.00   | 41.00   | 19.00       | 46.00           |
| 0.83          | 1.60          | 1.88          | 26.00   | 40.00   | 15.00       | 64.00           |

|        |        |        |        |        |        |        |
|--------|--------|--------|--------|--------|--------|--------|
| 1.25   | 2.80   | 3.13   | 16.00  | 36.00  | 28.00  | 64.00  |
| 1.00   | 2.60   | 1.75   | 20.00  | 46.00  | 35.00  | 69.00  |
| 1.17   | 1.40   | 2.25   | 24.00  | 37.00  | 22.00  | 60.00  |
| 0.00   | 0.50   | 1.29   | 23.00  | 41.00  | 21.00  | 52.00  |
| 1.00   | 1.40   | 2.00   | 24.00  | 42.00  | 29.00  | 46.00  |
| 1.17   | 1.20   | 2.00   | 30.00  | 44.00  | 24.00  | 60.00  |
| 0.00   | 2.00   | 3.00   | 18.00  | 39.00  | 24.00  | 41.00  |
| 0.50   | 1.00   | 2.38   | 18.00  | 35.00  | 27.00  | 60.00  |
| 1.67   | 1.20   | 1.88   | 24.00  | 37.00  | 22.00  | 64.00  |
| 1.83   | 3.00   | 3.00   | 29.00  | 37.00  | 28.00  | 43.00  |
| 0.33   | 0.80   | 2.75   | 17.00  | 40.00  | 27.00  | 56.00  |
| 0.67   | 0.60   | 2.13   | 23.00  | 34.00  | 34.00  | 60.00  |
| 0.00   | 0.60   | 1.75   | 18.00  | 35.00  | 26.00  | 59.00  |
| 0.17   | 2.40   | 2.71   | 13.00  | 35.00  | 26.00  | 50.00  |
| 2.00   | 1.60   | 2.25   | 31.00  | 32.00  | 27.00  | 53.00  |
| 1.50   | 2.40   | 2.25   | 21.00  | 46.00  | 33.00  | 70.00  |
| 0.00   | 1.40   | 2.63   | 22.00  | 36.00  | 16.00  | 45.00  |
| 0.33   | 1.40   | 2.25   | 17.00  | 40.00  | 29.00  | 47.00  |
| 0.83   | 1.40   | 2.13   | 36.00  | 38.00  | 19.00  | 60.00  |
| 0.50   | 0.80   | 2.25   | 19.00  | 34.00  | 32.00  | 70.00  |
| 0.67   | 1.80   | 2.00   | 18.00  | 38.00  | 35.00  | 70.00  |
| 0.50   | 2.00   | 2.38   | 18.00  | 37.00  | 13.00  | 52.00  |
| 0.17   | 0.40   | 2.50   | 20.00  | 45.00  | 30.00  | 70.00  |
| 0.67   | 3.00   | 3.14   | 19.00  | 33.00  | 6.00   | 59.00  |
| 2.67   | 2.40   | 2.50   | 19.00  | 31.00  | 19.00  | 56.00  |
| 1.67   | 1.60   | 2.50   | 18.00  | 38.00  | 25.00  | 56.00  |
| 1.33   | 2.00   | 2.13   | 24.00  | 37.00  | 27.00  | 58.00  |
| 0.17   | 0.80   | 1.75   | 14.00  | 42.00  | 26.00  | 54.00  |
| 1.00   | 2.40   | 3.50   | 28.00  | 41.00  | 28.00  | 51.00  |
| 0.00   | 0.60   | 1.75   | 15.00  | 42.00  | 28.00  | 62.00  |
| 0.00   | 1.20   | 2.00   | 14.00  | 38.00  | 31.00  | 62.00  |
| 1.00   | 0.60   | 1.50   | 27.00  | 36.00  | 23.00  | 63.00  |
| 0.83   | 1.00   | 1.88   | 34.00  | 36.00  | 14.00  | 60.00  |
| 0.67   | 1.60   | 2.38   | 19.00  | 38.00  | 23.00  | 70.00  |
| 0.00   | 1.00   | 2.25   | 16.00  | 48.00  | 35.00  | 68.00  |
| 1.00   | 1.20   | 2.13   | 25.00  | 41.00  | 28.00  | #NULL! |
| 1.00   | 1.40   | 2.25   | 23.00  | 36.00  | 25.00  | 63.00  |
| 1.00   | 1.20   | 2.13   | 22.00  | 38.00  | 23.00  | #NULL! |
| 0.83   | 1.60   | 3.00   | 36.00  | 25.00  | 17.00  | 47.00  |
| 1.00   | 1.60   | 2.63   | 16.00  | 30.00  | 28.00  | 33.00  |
| 1.00   | 1.40   | 2.00   | 24.00  | 42.00  | 21.00  | 63.00  |
| 1.33   | 1.80   | 3.29   | 14.00  | 34.00  | 21.00  | 43.00  |
| 0.50   | 2.80   | 2.13   | 17.00  | 42.00  | 35.00  | 67.00  |
| 1.00   | 1.20   | 1.63   | 21.00  | 42.00  | 28.00  | 51.00  |
| 2.83   | 1.40   | 2.13   | 26.00  | 30.00  | 21.00  | 41.00  |
| 0.50   | 1.40   | 2.63   | 26.00  | 39.00  | 17.00  | 41.00  |
| 1.17   | 1.60   | 2.63   | 32.00  | 38.00  | 9.00   | 61.00  |
| 1.00   | 2.40   | 2.63   | 21.00  | 33.00  | 21.00  | 40.00  |
| 0.17   | 0.60   | 2.13   | 16.00  | 40.00  | 24.00  | #NULL! |
| 1.33   | 2.00   | 3.13   | 21.00  | 36.00  | 17.00  | 51.00  |
| 0.00   | 0.80   | 2.38   | 15.00  | 39.00  | 20.00  | 43.00  |
| 0.00   | 0.40   | 2.50   | 14.00  | 36.00  | 29.00  | 61.00  |
| 0.83   | 1.00   | 3.38   | 27.00  | 41.00  | 8.00   | 65.00  |
| 2.17   | 1.00   | 2.88   | 18.00  | 46.00  | 26.00  | 57.00  |
| #NULL! | #NULL! | #NULL! | #NULL! | #NULL! | #NULL! | #NULL! |
| 0.67   | 1.25   | 2.50   | 23.00  | 31.00  | 22.00  | 55.00  |

|      |      |      |       |       |       |        |
|------|------|------|-------|-------|-------|--------|
| 1.17 | 1.80 | 1.75 | 29.00 | 43.00 | 21.00 | 49.00  |
| 0.50 | 1.40 | 2.88 | 19.00 | 32.00 | 28.00 | 60.00  |
| 0.33 | 0.40 | 2.25 | 24.00 | 35.00 | 18.00 | 40.00  |
| 0.33 | 2.60 | 2.63 | 22.00 | 32.00 | 24.00 | 56.00  |
| 0.67 | 0.60 | 1.25 | 25.00 | 36.00 | 23.00 | 60.00  |
| 1.00 | 1.60 | 2.00 | 19.00 | 34.00 | 26.00 | 64.00  |
| 1.00 | 2.80 | 3.50 | 22.00 | 42.00 | 28.00 | 58.00  |
| 0.50 | 1.00 | 2.13 | 19.00 | 41.00 | 28.00 | 69.00  |
| 1.83 | 2.00 | 3.50 | 23.00 | 37.00 | 27.00 | 48.00  |
| 0.50 | 2.80 | 1.88 | 29.00 | 37.00 | 28.00 | 60.00  |
| 0.83 | 1.60 | 1.63 | 22.00 | 41.00 | 30.00 | 69.00  |
| 0.67 | 2.40 | 2.75 | 20.00 | 29.00 | 23.00 | 55.00  |
| 1.33 | 2.00 | 2.88 | 23.00 | 38.00 | 24.00 | 47.00  |
| 0.33 | 1.40 | 2.38 | 18.00 | 40.00 | 24.00 | 60.00  |
| 0.50 | 1.40 | 2.25 | 22.00 | 42.00 | 29.00 | 66.00  |
| 2.83 | 2.00 | 2.88 | 29.00 | 42.00 | 25.00 | 50.00  |
| 1.00 | 2.20 | 2.25 | 24.00 | 46.00 | 22.00 | 50.00  |
| 0.00 | 0.40 | 1.38 | 13.00 | 38.00 | 34.00 | 67.00  |
| 0.67 | 1.40 | 2.13 | 16.00 | 37.00 | 29.00 | 64.00  |
| 1.00 | 2.20 | 2.50 | 28.00 | 45.00 | 28.00 | 59.00  |
| 0.83 | 1.60 | 1.88 | 30.00 | 47.00 | 24.00 | 41.00  |
| 0.00 | 1.00 | 2.63 | 21.00 | 33.00 | 16.00 | 51.00  |
| 0.67 | 1.20 | 2.75 | 25.00 | 32.00 | 19.00 | 55.00  |
| 1.00 | 2.50 | 3.43 | 21.00 | 40.00 | 34.00 | 46.00  |
| 1.17 | 2.40 | 2.29 | 25.00 | 43.00 | 28.00 | 58.00  |
| 0.50 | 2.40 | 2.13 | 32.00 | 38.00 | 17.00 | 61.00  |
| 0.00 | 0.60 | 2.00 | 18.00 | 44.00 | 29.00 | 70.00  |
| 0.67 | 0.60 | 1.88 | 34.00 | 40.00 | 14.00 | 44.00  |
| 0.83 | 1.00 | 1.63 | 17.00 | 35.00 | 30.00 | 58.00  |
| 1.67 | 1.40 | 1.50 | 29.00 | 35.00 | 27.00 | 67.00  |
| 0.50 | 1.40 | 2.38 | 22.00 | 34.00 | 26.00 | 52.00  |
| 0.83 | 1.20 | 3.38 | 16.00 | 40.00 | 31.00 | 66.00  |
| 1.50 | 2.00 | 2.63 | 21.00 | 40.00 | 24.00 | 42.00  |
| 1.17 | 1.80 | 2.25 | 23.00 | 35.00 | 27.00 | 58.00  |
| 2.50 | 2.25 | 2.75 | 24.00 | 35.00 | 29.00 | 57.00  |
| 1.17 | 2.20 | 2.25 | 22.00 | 43.00 | 33.00 | 62.00  |
| 0.17 | 0.60 | 2.38 | 17.00 | 38.00 | 29.00 | 70.00  |
| 1.00 | 1.20 | 1.63 | 25.00 | 39.00 | 21.00 | 54.00  |
| 0.50 | 2.20 | 2.63 | 24.00 | 36.00 | 20.00 | 49.00  |
| 0.83 | 2.60 | 3.25 | 18.00 | 40.00 | 28.00 | 56.00  |
| 1.83 | 2.20 | 1.14 | 20.00 | 37.00 | 29.00 | 56.00  |
| 0.50 | 0.80 | 1.63 | 23.00 | 30.00 | 14.00 | 33.00  |
| 1.33 | 2.20 | 2.00 | 34.00 | 32.00 | 12.00 | 43.00  |
| 1.00 | 1.40 | 2.25 | 29.00 | 38.00 | 28.00 | 56.00  |
| 1.83 | 1.80 | 1.75 | 19.00 | 37.00 | 31.00 | 46.00  |
| 0.00 | 0.60 | 1.88 | 19.00 | 35.00 | 27.00 | 64.00  |
| 1.50 | 2.80 | 2.25 | 24.00 | 36.00 | 23.00 | #NULL! |
| 0.67 | 1.60 | 1.75 | 14.00 | 35.00 | 22.00 | 35.00  |
| 1.50 | 2.00 | 2.13 | 29.00 | 42.00 | 28.00 | 45.00  |
| 1.17 | 1.60 | 2.63 | 22.00 | 41.00 | 30.00 | 62.00  |
| 1.17 | 2.00 | 2.63 | 17.00 | 38.00 | 26.00 | 54.00  |
| 1.33 | 1.60 | 2.75 | 22.00 | 26.00 | 23.00 | 49.00  |
| 0.17 | 0.40 | 1.63 | 19.00 | 42.00 | 29.00 | 70.00  |
| 1.00 | 1.80 | 3.00 | 18.00 | 39.00 | 20.00 | 47.00  |
| 1.33 | 2.20 | 1.63 | 29.00 | 36.00 | 22.00 | 55.00  |
| 0.67 | 0.40 | 1.50 | 33.00 | 40.00 | 11.00 | 55.00  |

|      |      |      |       |       |       |        |
|------|------|------|-------|-------|-------|--------|
| 8.00 | 7.00 | 9.00 | 26.00 | 38.00 | 17.00 | 40.00  |
| 1.83 | 0.80 | 2.38 | 21.00 | 45.00 | 33.00 | 68.00  |
| 1.17 | 0.60 | 2.13 | 19.00 | 40.00 | 29.00 | 64.00  |
| 1.33 | 2.40 | 2.00 | 35.00 | 37.00 | 8.00  | 35.00  |
| 1.33 | 1.60 | 3.00 | 26.00 | 40.00 | 22.00 | 50.00  |
| 0.67 | 0.60 | 1.25 | 22.00 | 39.00 | 17.00 | 58.00  |
| 0.33 | 1.60 | 2.00 | 20.00 | 40.00 | 23.00 | 60.00  |
| 0.83 | 1.40 | 2.25 | 23.00 | 41.00 | 24.00 | 60.00  |
| 0.00 | 1.60 | 3.43 | 17.00 | 32.00 | 28.00 | 13.00  |
| 1.67 | 1.40 | 2.25 | 21.00 | 35.00 | 22.00 | 49.00  |
| 0.33 | 0.60 | 2.25 | 18.00 | 34.00 | 31.00 | 66.00  |
| 0.00 | 1.20 | 2.88 | 17.00 | 26.00 | 7.00  | 18.00  |
| 3.00 | 2.80 | 1.57 | 34.00 | 38.00 | 26.00 | 49.00  |
| 2.00 | 1.20 | 2.25 | 23.00 | 36.00 | 14.00 | 55.00  |
| 2.33 | 2.20 | 2.63 | 28.00 | 34.00 | 13.00 | 32.00  |
| 3.00 | 0.80 | 1.50 | 24.00 | 18.00 | 6.00  | 25.00  |
| 1.17 | 1.40 | 2.38 | 31.00 | 34.00 | 20.00 | 45.00  |
| 0.17 | 0.80 | 2.00 | 30.00 | 44.00 | 24.00 | 45.00  |
| 0.83 | 1.60 | 1.88 | 18.00 | 35.00 | 13.00 | 36.00  |
| 0.00 | 0.80 | 2.00 | 19.00 | 43.00 | 27.00 | 67.00  |
| 0.00 | 0.40 | 2.38 | 15.00 | 45.00 | 33.00 | 62.00  |
| 1.17 | 1.80 | 2.25 | 24.00 | 39.00 | 26.00 | 60.00  |
| 0.50 | 1.80 | 3.13 | 15.00 | 38.00 | 25.00 | 53.00  |
| 1.17 | 2.80 | 1.88 | 28.00 | 40.00 | 26.00 | 48.00  |
| 1.17 | 1.60 | 2.38 | 22.00 | 37.00 | 31.00 | 52.00  |
| 0.33 | 0.40 | 1.43 | 20.00 | 45.00 | 35.00 | 70.00  |
| 0.83 | 1.00 | 1.63 | 22.00 | 40.00 | 29.00 | 67.00  |
| 0.17 | 1.20 | 1.86 | 16.00 | 34.00 | 25.00 | 62.00  |
| 2.00 | 2.60 | 2.38 | 26.00 | 25.00 | 22.00 | 37.00  |
| 1.00 | 1.80 | 1.63 | 29.00 | 41.00 | 26.00 | 46.00  |
| 1.50 | 1.00 | 2.13 | 18.00 | 43.00 | 19.00 | 46.00  |
| 1.00 | 1.80 | 2.75 | 36.00 | 41.00 | 30.00 | 51.00  |
| 1.50 | 2.20 | 2.75 | 23.00 | 33.00 | 20.00 | 36.00  |
| 0.00 | 0.60 | 2.75 | 20.00 | 43.00 | 28.00 | 70.00  |
| 1.17 | 1.00 | 2.57 | 18.00 | 34.00 | 18.00 | 45.00  |
| 1.33 | 1.40 | 2.00 | 26.00 | 41.00 | 17.00 | 49.00  |
| 0.67 | 1.80 | 3.00 | 25.00 | 39.00 | 24.00 | 41.00  |
| 2.33 | 2.60 | 1.88 | 42.00 | 33.00 | 18.00 | 50.00  |
| 2.40 | 3.25 | 2.63 | 41.00 | 30.00 | 11.00 | 44.00  |
| 0.67 | 1.40 | 1.38 | 23.00 | 38.00 | 19.00 | 41.00  |
| 1.33 | 1.20 | 2.75 | 17.00 | 32.00 | 19.00 | 47.00  |
| 0.83 | 1.40 | 2.75 | 16.00 | 39.00 | 27.00 | 54.00  |
| 0.33 | 1.80 | 3.00 | 38.00 | 26.00 | 9.00  | 10.00  |
| 0.67 | 2.00 | 1.75 | 16.00 | 41.00 | 34.00 | #NULL! |
| 1.00 | 1.40 | 1.63 | 28.00 | 42.00 | 15.00 | 54.00  |
| 0.50 | 1.80 | 2.38 | 32.00 | 35.00 | 27.00 | 41.00  |
| 0.17 | 0.40 | 2.25 | 16.00 | 43.00 | 31.00 | 54.00  |
| 0.33 | 1.75 | 2.88 | 19.00 | 33.00 | 19.00 | 46.00  |
| 1.00 | 1.40 | 2.00 | 19.00 | 39.00 | 27.00 | 67.00  |
| 0.50 | 1.50 | 1.71 | 28.00 | 38.00 | 17.00 | 51.00  |
| 0.67 | 0.60 | 1.75 | 21.00 | 45.00 | 24.00 | 61.00  |
| 2.50 | 2.80 | 2.25 | 29.00 | 40.00 | 19.00 | 47.00  |
| 1.00 | 1.80 | 3.00 | 22.00 | 39.00 | 20.00 | 43.00  |
| 1.50 | 0.80 | 2.75 | 24.00 | 26.00 | 7.00  | 35.00  |
| 0.17 | 0.60 | 1.38 | 23.00 | 40.00 | 28.00 | 64.00  |
| 1.33 | 1.40 | 2.38 | 16.00 | 38.00 | 19.00 | 47.00  |

|      |      |      |       |       |       |        |
|------|------|------|-------|-------|-------|--------|
| 1.83 | 2.20 | 2.75 | 33.00 | 35.00 | 17.00 | 47.00  |
| 0.17 | 0.60 | 2.25 | 19.00 | 40.00 | 27.00 | 65.00  |
| 1.00 | 2.40 | 2.50 | 26.00 | 36.00 | 13.00 | 44.00  |
| 1.33 | 1.40 | 2.50 | 18.00 | 33.00 | 16.00 | 52.00  |
| 1.17 | 1.60 | 2.75 | 26.00 | 33.00 | 20.00 | 45.00  |
| 1.17 | 1.75 | 2.29 | 23.00 | 39.00 | 12.00 | 44.00  |
| 0.50 | 0.00 | 1.25 | 17.00 | 43.00 | 30.00 | 61.00  |
| 0.50 | 1.80 | 2.38 | 20.00 | 37.00 | 29.00 | 61.00  |
| 1.17 | 1.20 | 1.75 | 23.00 | 35.00 | 18.00 | 47.00  |
| 1.17 | 2.20 | 2.88 | 27.00 | 34.00 | 10.00 | 45.00  |
| 2.00 | 1.60 | 2.38 | 19.00 | 43.00 | 27.00 | 43.00  |
| 0.83 | 1.80 | 2.13 | 21.00 | 36.00 | 31.00 | 61.00  |
| 0.67 | 1.60 | 1.88 | 19.00 | 44.00 | 25.00 | 42.00  |
| 1.00 | 1.60 | 2.63 | 29.00 | 35.00 | 22.00 | 48.00  |
| 1.50 | 2.00 | 2.88 | 31.00 | 31.00 | 28.00 | 56.00  |
| 1.17 | 1.60 | 2.50 | 23.00 | 41.00 | 29.00 | 49.00  |
| 2.50 | 1.40 | 2.38 | 38.00 | 40.00 | 19.00 | 51.00  |
| 1.50 | 2.60 | 2.38 | 19.00 | 41.00 | 27.00 | 56.00  |
| 0.80 | 1.00 | 2.75 | 19.00 | 35.00 | 21.00 | 55.00  |
| 0.67 | 1.20 | 1.43 | 16.00 | 36.00 | 28.00 | 51.00  |
| 1.00 | 1.80 | 2.38 | 16.00 | 44.00 | 26.00 | 70.00  |
| 0.67 | 2.20 | 1.63 | 13.00 | 42.00 | 29.00 | 60.00  |
| 1.17 | 1.20 | 2.38 | 28.00 | 36.00 | 26.00 | #NULL! |
| 2.83 | 1.40 | 2.75 | 24.00 | 41.00 | 22.00 | 43.00  |
| 1.83 | 2.00 | 2.00 | 24.00 | 36.00 | 21.00 | 43.00  |
| 2.83 | 1.75 | 3.86 | 30.00 | 25.00 | 9.00  | 30.00  |
| 1.33 | 2.00 | 2.75 | 20.00 | 41.00 | 24.00 | 42.00  |
| 0.33 | 1.00 | 2.25 | 23.00 | 38.00 | 35.00 | 70.00  |
| 0.67 | 1.60 | 2.13 | 18.00 | 30.00 | 19.00 | 69.00  |
| 1.00 | 1.40 | 2.88 | 27.00 | 39.00 | 22.00 | #NULL! |
| 2.50 | 2.60 | 2.50 | 32.00 | 32.00 | 19.00 | 36.00  |
| 0.00 | 1.60 | 1.63 | 26.00 | 47.00 | 25.00 | 55.00  |
| 1.00 | 1.60 | 2.00 | 29.00 | 44.00 | 28.00 | #NULL! |
| 0.33 | 2.60 | 2.75 | 20.00 | 35.00 | 29.00 | 62.00  |
| 0.33 | 0.60 | 2.00 | 18.00 | 41.00 | 21.00 | 39.00  |
| 1.00 | 1.00 | 2.88 | 23.00 | 41.00 | 25.00 | 54.00  |
| 0.67 | 2.00 | 2.86 | 17.00 | 31.00 | 25.00 | 52.00  |
| 0.50 | 1.20 | 1.88 | 15.00 | 43.00 | 27.00 | 52.00  |
| 0.83 | 1.80 | 1.88 | 26.00 | 38.00 | 22.00 | 60.00  |
| 1.17 | 1.60 | 2.13 | 22.00 | 41.00 | 29.00 | 69.00  |
| 0.33 | 1.20 | 2.29 | 17.00 | 52.00 | 29.00 | 65.00  |
| 2.33 | 3.00 | 2.88 | 26.00 | 35.00 | 27.00 | 37.00  |
| 1.67 | 2.80 | 2.75 | 29.00 | 45.00 | 21.00 | 49.00  |
| 1.00 | 1.60 | 2.38 | 16.00 | 34.00 | 25.00 | 45.00  |
| 1.67 | 1.40 | 2.25 | 29.00 | 37.00 | 22.00 | 47.00  |
| 1.33 | 2.60 | 2.63 | 17.00 | 40.00 | 26.00 | 58.00  |
| 1.00 | 1.40 | 2.25 | 23.00 | 35.00 | 26.00 | 33.00  |
| 1.17 | 1.60 | 2.13 | 15.00 | 37.00 | 26.00 | 70.00  |
| 1.17 | 1.40 | 2.00 | 21.00 | 37.00 | 21.00 | 59.00  |
| 1.17 | 1.00 | 1.50 | 22.00 | 43.00 | 21.00 | 53.00  |
| 0.83 | 1.60 | 1.63 | 16.00 | 43.00 | 23.00 | 55.00  |
| 2.00 | 1.20 | 1.75 | 27.00 | 39.00 | 23.00 | 50.00  |
| 1.33 | 1.80 | 3.00 | 23.00 | 32.00 | 29.00 | 54.00  |
| 3.00 | 2.20 | 1.75 | 29.00 | 29.00 | 19.00 | 61.00  |
| 2.50 | 2.80 | 2.75 | 35.00 | 25.00 | 6.00  | 31.00  |
| 0.83 | 2.00 | 2.13 | 17.00 | 33.00 | 20.00 | 50.00  |





| subjective_health1 | sexual_activity | ppanas_z | npanas_z | smoking_currently | years_smoking |
|--------------------|-----------------|----------|----------|-------------------|---------------|
| 4.00               | 10.00           | 0.12     | -0.41    | 0.00              | 0.00          |
| 2.00               | #NULL!          | #NULL!   | #NULL!   | #NULL!            | #NULL!        |
| 3.00               | 1.00            | 0.31     | 0.26     | 0.00              | 14.00         |
| 1.00               | 0.25            | 1.11     | -0.74    | 0.00              | 0.00          |
| 5.00               | 0.00            | -0.08    | -0.74    | 0.00              | 0.00          |
| 5.00               | 4.00            | 0.31     | -1.23    | 0.00              | 7.00          |
| 5.00               | 4.00            | 0.51     | -0.07    | 1.00              | 9.00          |
| 4.00               | #NULL!          | 0.91     | 0.26     | 0.00              | 17.00         |
| 4.00               | #NULL!          | #NULL!   | #NULL!   | #NULL!            | #NULL!        |
| 1.00               | 0.00            | -1.27    | -1.73    | 0.00              | 0.00          |
| 4.00               | 4.00            | -0.28    | -0.41    | 0.00              | 0.00          |
| 5.00               | #NULL!          | #NULL!   | #NULL!   | #NULL!            | #NULL!        |
| 4.00               | #NULL!          | #NULL!   | #NULL!   | #NULL!            | #NULL!        |
| 4.00               | #NULL!          | #NULL!   | #NULL!   | #NULL!            | #NULL!        |
| 3.00               | 4.00            | -1.47    | -1.40    | 0.00              | 18.00         |
| 4.00               | #NULL!          | #NULL!   | #NULL!   | #NULL!            | #NULL!        |
| 4.00               | #NULL!          | #NULL!   | #NULL!   | #NULL!            | #NULL!        |
| 4.00               | 10.00           | -2.46    | -1.73    | 0.00              | 0.00          |
| 5.00               | 1.00            | -0.48    | 0.92     | 0.00              | 25.00         |
| 4.00               | 10.00           | -1.87    | -0.57    | 0.00              | 0.00          |
| 4.00               | 1.00            | 1.11     | -0.74    | 0.00              | 0.00          |
| 4.00               | #NULL!          | #NULL!   | #NULL!   | #NULL!            | #NULL!        |
| 4.00               | #NULL!          | #NULL!   | #NULL!   | #NULL!            | #NULL!        |
| 4.00               | 1.00            | 0.31     | -0.74    | 1.00              | 0.00          |
| 3.00               | 4.00            | 1.31     | 0.75     | 0.00              | 0.00          |
| 4.00               | #NULL!          | #NULL!   | #NULL!   | #NULL!            | #NULL!        |
| 3.00               | #NULL!          | #NULL!   | #NULL!   | #NULL!            | #NULL!        |
| 3.00               | #NULL!          | #NULL!   | #NULL!   | #NULL!            | #NULL!        |
| 5.00               | #NULL!          | #NULL!   | #NULL!   | #NULL!            | #NULL!        |
| 5.00               | #NULL!          | #NULL!   | #NULL!   | #NULL!            | #NULL!        |
| 5.00               | #NULL!          | #NULL!   | #NULL!   | #NULL!            | #NULL!        |
| 5.00               | 10.00           | -0.68    | -1.56    | 0.00              | 0.00          |
| 4.00               | 0.25            | -0.48    | -0.24    | 1.00              | 30.00         |
| 5.00               | #NULL!          | #NULL!   | #NULL!   | #NULL!            | #NULL!        |
| #NULL!             | #NULL!          | #NULL!   | #NULL!   | #NULL!            | #NULL!        |
| #NULL!             | #NULL!          | #NULL!   | #NULL!   | #NULL!            | #NULL!        |
| #NULL!             | #NULL!          | #NULL!   | #NULL!   | #NULL!            | #NULL!        |
| #NULL!             | #NULL!          | #NULL!   | #NULL!   | #NULL!            | #NULL!        |
| 5.00               | #NULL!          | #NULL!   | #NULL!   | #NULL!            | #NULL!        |
| 3.00               | #NULL!          | #NULL!   | #NULL!   | #NULL!            | #NULL!        |
| 4.00               | #NULL!          | #NULL!   | #NULL!   | #NULL!            | #NULL!        |
| 4.00               | 0.00            | -0.68    | -1.07    | 0.00              | 0.00          |
| 3.00               | #NULL!          | #NULL!   | #NULL!   | #NULL!            | #NULL!        |
| 4.00               | #NULL!          | #NULL!   | #NULL!   | #NULL!            | #NULL!        |
| 3.00               | #NULL!          | #NULL!   | #NULL!   | #NULL!            | #NULL!        |
| 5.00               | 10.00           | 1.90     | -0.90    | 0.00              | 0.00          |
| 4.00               | 10.00           | 0.91     | -1.23    | 0.00              | 14.00         |
| 4.00               | #NULL!          | #NULL!   | #NULL!   | #NULL!            | #NULL!        |
| 5.00               | 4.00            | 1.50     | 0.26     | 0.00              | 0.00          |
| 5.00               | #NULL!          | #NULL!   | #NULL!   | #NULL!            | #NULL!        |
| 4.00               | 4.00            | 1.50     | -0.74    | 0.00              | 0.00          |
| 3.00               | #NULL!          | #NULL!   | #NULL!   | #NULL!            | #NULL!        |
| 3.00               | #NULL!          | #NULL!   | #NULL!   | #NULL!            | #NULL!        |
| 4.00               | #NULL!          | #NULL!   | #NULL!   | #NULL!            | #NULL!        |
| 2.00               | 0.00            | 0.51     | 0.42     | 0.00              | 1.50          |

|        |        |        |        |        |        |
|--------|--------|--------|--------|--------|--------|
| 5.00   | 4.00   | -0.48  | -1.23  | 0.00   | 0.00   |
| 5.00   | #NULL! | #NULL! | #NULL! | #NULL! | #NULL! |
| 2.00   | 4.00   | -0.08  | 0.09   | 0.00   | 0.00   |
| 5.00   | #NULL! | 0.71   | -0.07  | 0.00   | 0.00   |
| 5.00   | 0.00   | 1.11   | 0.09   | 0.00   | 0.00   |
| 3.00   | #NULL! | #NULL! | #NULL! | #NULL! | #NULL! |
| 5.00   | #NULL! | #NULL! | #NULL! | #NULL! | #NULL! |
| 4.00   | 10.00  | -0.48  | -0.90  | 0.00   | 0.00   |
| 4.00   | #NULL! | #NULL! | #NULL! | #NULL! | #NULL! |
| 3.00   | 0.00   | 0.12   | 0.92   | 0.00   | 5.00   |
| 5.00   | 10.00  | 0.51   | -1.07  | 0.00   | 0.00   |
| 5.00   | 10.00  | -0.68  | -0.07  | 0.00   | 0.00   |
| 4.00   | #NULL! | #NULL! | #NULL! | #NULL! | #NULL! |
| 4.00   | #NULL! | #NULL! | #NULL! | #NULL! | #NULL! |
| 4.00   | 4.00   | -0.88  | 1.25   | 0.00   | 0.00   |
| 5.00   | 4.00   | 1.70   | -0.41  | 0.00   | 8.00   |
| 4.00   | 10.00  | -0.28  | -0.24  | 0.00   | 0.00   |
| 5.00   | #NULL! | #NULL! | #NULL! | #NULL! | #NULL! |
| 2.00   | 1.00   | 0.12   | 2.08   | 1.00   | 10.00  |
| 4.00   | #NULL! | #NULL! | #NULL! | #NULL! | #NULL! |
| 4.00   | 10.00  | -0.28  | -0.90  | 0.00   | 13.00  |
| 4.00   | #NULL! | #NULL! | #NULL! | #NULL! | #NULL! |
| 4.00   | #NULL! | #NULL! | #NULL! | #NULL! | #NULL! |
| 4.00   | 1.00   | -1.27  | -0.74  | 0.00   | 0.00   |
| 3.00   | 4.00   | -1.07  | -0.74  | 0.00   | 32.00  |
| 5.00   | #NULL! | #NULL! | #NULL! | #NULL! | #NULL! |
| 3.00   | 1.00   | 0.12   | 0.09   | 0.00   | 0.00   |
| 5.00   | #NULL! | #NULL! | #NULL! | #NULL! | #NULL! |
| 4.00   | #NULL! | #NULL! | #NULL! | #NULL! | #NULL! |
| 5.00   | 4.00   | 0.71   | -1.40  | 0.00   | 17.00  |
| 5.00   | 1.00   | -0.08  | -1.56  | 0.00   | 0.00   |
| 5.00   | 1.00   | -0.08  | 0.59   | 0.00   | 0.00   |
| 3.00   | #NULL! | #NULL! | #NULL! | #NULL! | #NULL! |
| 4.00   | #NULL! | #NULL! | #NULL! | #NULL! | #NULL! |
| 5.00   | 10.00  | 1.70   | -1.23  | 0.00   | 0.00   |
| 5.00   | #NULL! | #NULL! | #NULL! | #NULL! | #NULL! |
| 4.00   | #NULL! | #NULL! | #NULL! | #NULL! | #NULL! |
| 4.00   | #NULL! | #NULL! | #NULL! | #NULL! | #NULL! |
| 2.00   | 4.00   | -1.87  | 2.08   | 0.00   | 0.00   |
| 4.00   | 0.25   | -1.27  | -1.23  | 1.00   | 46.00  |
| 3.00   | #NULL! | #NULL! | #NULL! | #NULL! | #NULL! |
| 4.00   | #NULL! | #NULL! | #NULL! | #NULL! | #NULL! |
| 5.00   | #NULL! | #NULL! | #NULL! | #NULL! | #NULL! |
| 4.00   | #NULL! | #NULL! | #NULL! | #NULL! | #NULL! |
| 3.00   | 0.00   | -0.88  | 0.42   | 0.00   | 10.00  |
| 4.00   | 0.00   | 0.71   | 0.42   | 0.00   | 25.00  |
| 3.00   | 0.25   | 0.51   | 1.42   | 0.00   | 5.00   |
| 5.00   | #NULL! | #NULL! | #NULL! | #NULL! | #NULL! |
| 4.00   | #NULL! | #NULL! | #NULL! | #NULL! | #NULL! |
| 5.00   | #NULL! | #NULL! | #NULL! | #NULL! | #NULL! |
| 5.00   | #NULL! | #NULL! | #NULL! | #NULL! | #NULL! |
| 5.00   | #NULL! | #NULL! | #NULL! | #NULL! | #NULL! |
| 4.00   | 10.00  | 0.91   | 0.59   | 0.00   | 5.00   |
| 4.00   | #NULL! | #NULL! | #NULL! | #NULL! | #NULL! |
| #NULL! | #NULL! | #NULL! | #NULL! | #NULL! | #NULL! |
| 5.00   | 10.00  | -1.07  | -0.07  | 0.00   | 13.00  |



|        |      |        |        |        |        |        |
|--------|------|--------|--------|--------|--------|--------|
|        | 3.00 | 10.00  | 0.51   | 0.42   | 0.00   | 0.00   |
|        | 4.00 | 4.00   | 1.50   | -0.41  | 0.00   | 16.00  |
|        | 4.00 | 0.25   | 0.91   | -0.74  | 1.00   | 32.00  |
| #NULL! |      | 0.00   | 0.51   | 1.91   | 0.00   | 45.00  |
|        | 3.00 | #NULL! | #NULL! | #NULL! | #NULL! | #NULL! |
|        | 4.00 | 4.00   | -0.08  | -0.24  | 0.00   | 0.00   |
|        | 4.00 | #NULL! | #NULL! | #NULL! | #NULL! | #NULL! |
|        | 5.00 | #NULL! | #NULL! | #NULL! | #NULL! | #NULL! |
|        | 4.00 | #NULL! | #NULL! | #NULL! | #NULL! | #NULL! |
|        | 4.00 | #NULL! | #NULL! | #NULL! | #NULL! | #NULL! |
|        | 4.00 | #NULL! | #NULL! | #NULL! | #NULL! | #NULL! |
|        | 3.00 | 4.00   | -1.67  | -1.07  | 0.00   | 0.00   |
|        | 3.00 | 0.00   | 0.71   | 1.75   | 0.00   | 0.00   |
|        | 4.00 | #NULL! | #NULL! | #NULL! | #NULL! | #NULL! |
|        | 3.00 | #NULL! | #NULL! | #NULL! | #NULL! | #NULL! |
|        | 2.00 | 0.00   | -3.65  | 0.09   | 0.00   | 5.00   |
|        | 4.00 | 0.00   | -0.28  | 1.25   | 0.00   | 0.00   |
|        | 5.00 | #NULL! | #NULL! | #NULL! | #NULL! | #NULL! |
|        | 4.00 | #NULL! | #NULL! | #NULL! | #NULL! | #NULL! |
|        | 4.00 | #NULL! | #NULL! | #NULL! | #NULL! | #NULL! |
|        | 5.00 | #NULL! | #NULL! | #NULL! | #NULL! | #NULL! |
|        | 4.00 | #NULL! | #NULL! | #NULL! | #NULL! | #NULL! |
|        | 4.00 | #NULL! | #NULL! | #NULL! | #NULL! | #NULL! |
|        | 4.00 | 4.00   | 0.71   | 0.75   | 0.00   | 0.00   |
|        | 5.00 | #NULL! | #NULL! | #NULL! | #NULL! | #NULL! |
|        | 5.00 | #NULL! | #NULL! | #NULL! | #NULL! | #NULL! |
|        | 4.00 | #NULL! | #NULL! | #NULL! | #NULL! | #NULL! |
|        | 4.00 | #NULL! | #NULL! | #NULL! | #NULL! | #NULL! |
|        | 3.00 | 0.00   | -1.87  | 0.42   | 0.00   | 0.00   |
|        | 4.00 | #NULL! | #NULL! | #NULL! | #NULL! | #NULL! |
|        | 5.00 | #NULL! | #NULL! | #NULL! | #NULL! | #NULL! |
|        | 3.00 | #NULL! | #NULL! | #NULL! | #NULL! | #NULL! |
|        | 4.00 | #NULL! | #NULL! | #NULL! | #NULL! | #NULL! |
|        | 5.00 | #NULL! | #NULL! | #NULL! | #NULL! | #NULL! |
|        | 5.00 | 10.00  | -0.68  | -0.90  | 1.00   | 0.00   |
|        | 4.00 | #NULL! | #NULL! | #NULL! | #NULL! | #NULL! |
|        | 4.00 | 0.25   | 0.51   | 0.26   | 0.00   | 0.00   |
|        | 5.00 | 20.00  | -0.68  | 3.07   | 0.00   | 21.00  |
|        | 4.00 | 0.25   | -1.07  | 2.91   | 0.00   | 0.00   |
|        | 5.00 | 0.00   | -0.08  | -0.07  | 0.00   | 0.00   |
|        | 3.00 | #NULL! | #NULL! | #NULL! | #NULL! | #NULL! |
|        | 4.00 | #NULL! | #NULL! | #NULL! | #NULL! | #NULL! |
|        | 5.00 | #NULL! | #NULL! | #NULL! | #NULL! | #NULL! |
|        | 5.00 | #NULL! | #NULL! | #NULL! | #NULL! | #NULL! |
|        | 4.00 | #NULL! | 1.50   | 0.75   | 0.00   | 22.00  |
|        | 4.00 | #NULL! | #NULL! | #NULL! | #NULL! | #NULL! |
|        | 4.00 | #NULL! | #NULL! | #NULL! | #NULL! | #NULL! |
|        | 4.00 | 0.25   | -0.28  | -0.74  | 0.00   | 0.00   |
|        | 5.00 | 4.00   | 0.12   | -0.74  | 1.00   | 0.00   |
|        | 4.00 | 0.00   | -0.08  | 0.75   | 0.00   | 12.00  |
|        | 4.00 | #NULL! | #NULL! | #NULL! | #NULL! | #NULL! |
|        | 4.00 | 4.00   | 0.91   | 0.92   | 0.00   | 12.00  |
|        | 3.00 | #NULL! | #NULL! | #NULL! | #NULL! | #NULL! |
|        | 2.00 | 1.00   | -2.07  | 0.09   | 1.00   | 0.00   |
|        | 5.00 | #NULL! | #NULL! | #NULL! | #NULL! | #NULL! |
|        | 4.00 | #NULL! | #NULL! | #NULL! | #NULL! | #NULL! |

|      |        |        |        |        |        |
|------|--------|--------|--------|--------|--------|
| 4.00 | #NULL! | #NULL! | #NULL! | #NULL! | #NULL! |
| 4.00 | 1.00   | 0.51   | -0.74  | 0.00   | 0.00   |
| 5.00 | 4.00   | -0.28  | 0.42   | 0.00   | 0.00   |
| 3.00 | #NULL! | #NULL! | #NULL! | #NULL! | #NULL! |
| 5.00 | 30.00  | -0.68  | 0.42   | 0.00   | 0.00   |
| 4.00 | 0.00   | 0.31   | -0.07  | 0.00   | 40.00  |
| 5.00 | #NULL! | #NULL! | #NULL! | #NULL! | #NULL! |
| 4.00 | 4.00   | -0.28  | -0.57  | 0.00   | 0.00   |
| 3.00 | #NULL! | #NULL! | #NULL! | #NULL! | #NULL! |
| 3.00 | 1.00   | -0.28  | 0.59   | 0.00   | 0.00   |
| 5.00 | #NULL! | #NULL! | #NULL! | #NULL! | #NULL! |
| 5.00 | 1.00   | -0.08  | -0.41  | 0.00   | 0.00   |
| 4.00 | #NULL! | #NULL! | #NULL! | #NULL! | #NULL! |
| 4.00 | #NULL! | #NULL! | #NULL! | #NULL! | #NULL! |
| 4.00 | #NULL! | #NULL! | #NULL! | #NULL! | #NULL! |
| 3.00 | #NULL! | #NULL! | #NULL! | #NULL! | #NULL! |
| 3.00 | 4.00   | 0.91   | 2.41   | 0.00   | 0.00   |
| 4.00 | #NULL! | #NULL! | #NULL! | #NULL! | #NULL! |
| 3.00 | #NULL! | #NULL! | #NULL! | #NULL! | #NULL! |
| 5.00 | #NULL! | #NULL! | #NULL! | #NULL! | #NULL! |
| 4.00 | #NULL! | #NULL! | #NULL! | #NULL! | #NULL! |
| 4.00 | #NULL! | #NULL! | #NULL! | #NULL! | #NULL! |
| 5.00 | #NULL! | #NULL! | #NULL! | #NULL! | #NULL! |
| 4.00 | 0.00   | 0.71   | 0.09   | 0.00   | 0.00   |
| 4.00 | #NULL! | #NULL! | #NULL! | #NULL! | #NULL! |
| 4.00 | 10.00  | -2.27  | 1.09   | 0.00   | 2.00   |
| 5.00 | 0.25   | 0.91   | -0.57  | 0.00   | 0.00   |
| 4.00 | 10.00  | -0.08  | -0.07  | 1.00   | 28.00  |
| 4.00 | #NULL! | #NULL! | #NULL! | #NULL! | #NULL! |
| 3.00 | #NULL! | #NULL! | #NULL! | #NULL! | #NULL! |
| 4.00 | 10.00  | -0.48  | 1.42   | 0.00   | 0.00   |
| 4.00 | #NULL! | #NULL! | #NULL! | #NULL! | #NULL! |
| 3.00 | #NULL! | #NULL! | #NULL! | #NULL! | #NULL! |
| 4.00 | #NULL! | #NULL! | #NULL! | #NULL! | #NULL! |
| 5.00 | 0.25   | 0.51   | -0.90  | 0.00   | 3.00   |
| 4.00 | #NULL! | #NULL! | #NULL! | #NULL! | #NULL! |
| 4.00 | #NULL! | #NULL! | #NULL! | #NULL! | #NULL! |
| 4.00 | #NULL! | #NULL! | #NULL! | #NULL! | #NULL! |
| 4.00 | #NULL! | #NULL! | #NULL! | #NULL! | #NULL! |
| 5.00 | #NULL! | #NULL! | #NULL! | #NULL! | #NULL! |
| 4.00 | #NULL! | #NULL! | #NULL! | #NULL! | #NULL! |
| 4.00 | #NULL! | -0.28  | 0.42   | 0.00   | 0.00   |
| 5.00 | #NULL! | #NULL! | #NULL! | #NULL! | #NULL! |
| 2.00 | 0.00   | -0.68  | -1.23  | 1.00   | 17.00  |
| 5.00 | 10.00  | 0.31   | 0.92   | 0.00   | 0.00   |
| 4.00 | #NULL! | #NULL! | #NULL! | #NULL! | #NULL! |
| 3.00 | #NULL! | #NULL! | #NULL! | #NULL! | #NULL! |
| 4.00 | #NULL! | #NULL! | #NULL! | #NULL! | #NULL! |
| 4.00 | #NULL! | #NULL! | #NULL! | #NULL! | #NULL! |
| 4.00 | #NULL! | #NULL! | #NULL! | #NULL! | #NULL! |
| 4.00 | #NULL! | 0.91   | -1.23  | 0.00   | 26.00  |
| 5.00 | #NULL! | #NULL! | #NULL! | #NULL! | #NULL! |
| 4.00 | #NULL! | #NULL! | #NULL! | #NULL! | #NULL! |
| 3.00 | #NULL! | #NULL! | #NULL! | #NULL! | #NULL! |
| 3.00 | #NULL! | #NULL! | #NULL! | #NULL! | #NULL! |
| 5.00 | 0.25   | -1.07  | -1.07  | 0.00   | 0.00   |



| physical_disease | physical_disease1 | illness | illness1 | lo_hi  | SD_Z   | HA_Z   |
|------------------|-------------------|---------|----------|--------|--------|--------|
| 4.00             | 3.00              | 1.00    | 1.00     | 1.00   | 1.29   | -1.40  |
| #NULL!           | #NULL!            | #NULL!  | #NULL!   | #NULL! | #NULL! | #NULL! |
| 6.00             | 5.00              | 1.00    | 1.00     | 1.00   | 0.16   | 0.84   |
| 1.00             | 1.00              | 1.00    | 0.00     | 1.00   | 0.07   | -0.37  |
| 2.00             | 2.00              | 1.00    | 1.00     | 0.00   | 1.11   | -1.40  |
| 0.00             | 0.00              | 0.00    | 0.00     | 1.00   | 1.63   | -1.58  |
| 1.00             | 1.00              | 1.00    | 0.00     | 1.00   | 1.63   | -0.54  |
| 3.00             | 3.00              | 1.00    | 1.00     | 1.00   | 1.37   | -1.32  |
| #NULL!           | #NULL!            | #NULL!  | #NULL!   | #NULL! | #NULL! | #NULL! |
| 2.00             | 2.00              | 1.00    | 1.00     | 1.00   | 0.42   | -0.63  |
| 2.00             | 2.00              | 1.00    | 1.00     | 1.00   | 1.03   | -0.02  |
| #NULL!           | #NULL!            | #NULL!  | #NULL!   | #NULL! | #NULL! | #NULL! |
| #NULL!           | #NULL!            | #NULL!  | #NULL!   | #NULL! | #NULL! | #NULL! |
| #NULL!           | #NULL!            | #NULL!  | #NULL!   | #NULL! | #NULL! | #NULL! |
| 4.00             | 3.00              | 1.00    | 1.00     | 1.00   | -0.62  | -0.28  |
| #NULL!           | #NULL!            | #NULL!  | #NULL!   | #NULL! | #NULL! | #NULL! |
| #NULL!           | #NULL!            | #NULL!  | #NULL!   | #NULL! | #NULL! | #NULL! |
| 3.00             | 3.00              | 1.00    | 1.00     | 0.00   | 1.63   | 1.01   |
| 1.00             | 1.00              | 1.00    | 0.00     | 0.00   | -1.66  | -0.28  |
| 1.00             | 1.00              | 1.00    | 0.00     | 0.00   | -0.10  | 1.10   |
| 1.00             | 1.00              | 1.00    | 0.00     | 1.00   | 0.85   | -2.01  |
| #NULL!           | #NULL!            | #NULL!  | #NULL!   | #NULL! | #NULL! | #NULL! |
| #NULL!           | #NULL!            | #NULL!  | #NULL!   | #NULL! | #NULL! | #NULL! |
| 3.00             | 3.00              | 1.00    | 1.00     | 1.00   | 0.51   | -1.06  |
| 0.00             | 0.00              | 0.00    | 0.00     | 0.00   | -0.01  | 0.15   |
| #NULL!           | #NULL!            | #NULL!  | #NULL!   | #NULL! | #NULL! | #NULL! |
| #NULL!           | #NULL!            | #NULL!  | #NULL!   | #NULL! | #NULL! | #NULL! |
| #NULL!           | #NULL!            | #NULL!  | #NULL!   | #NULL! | #NULL! | #NULL! |
| #NULL!           | #NULL!            | #NULL!  | #NULL!   | #NULL! | #NULL! | #NULL! |
| #NULL!           | #NULL!            | #NULL!  | #NULL!   | #NULL! | #NULL! | #NULL! |
| #NULL!           | #NULL!            | #NULL!  | #NULL!   | #NULL! | #NULL! | #NULL! |
| #NULL!           | #NULL!            | #NULL!  | #NULL!   | #NULL! | #NULL! | #NULL! |
| 1.00             | 1.00              | 1.00    | 0.00     | 1.00   | 1.63   | -0.80  |
| 1.00             | 1.00              | 1.00    | 0.00     | 0.00   | -0.62  | 1.45   |
| #NULL!           | #NULL!            | #NULL!  | #NULL!   | #NULL! | #NULL! | #NULL! |
| #NULL!           | #NULL!            | #NULL!  | #NULL!   | #NULL! | #NULL! | #NULL! |
| #NULL!           | #NULL!            | #NULL!  | #NULL!   | #NULL! | #NULL! | #NULL! |
| #NULL!           | #NULL!            | #NULL!  | #NULL!   | #NULL! | #NULL! | #NULL! |
| #NULL!           | #NULL!            | #NULL!  | #NULL!   | #NULL! | #NULL! | #NULL! |
| #NULL!           | #NULL!            | #NULL!  | #NULL!   | #NULL! | #NULL! | #NULL! |
| #NULL!           | #NULL!            | #NULL!  | #NULL!   | #NULL! | #NULL! | #NULL! |
| 1.00             | 1.00              | 1.00    | 0.00     | 1.00   | 0.25   | -0.11  |
| #NULL!           | #NULL!            | #NULL!  | #NULL!   | #NULL! | #NULL! | #NULL! |
| #NULL!           | #NULL!            | #NULL!  | #NULL!   | #NULL! | #NULL! | #NULL! |
| #NULL!           | #NULL!            | #NULL!  | #NULL!   | #NULL! | #NULL! | #NULL! |
| 0.00             | 0.00              | 0.00    | 0.00     | 1.00   | 0.42   | -2.01  |
| 2.00             | 2.00              | 1.00    | 1.00     | 1.00   | 1.37   | -0.37  |
| #NULL!           | #NULL!            | #NULL!  | #NULL!   | #NULL! | #NULL! | #NULL! |
| 2.00             | 1.00              | 1.00    | 1.00     | 1.00   | 1.11   | -1.66  |
| #NULL!           | #NULL!            | #NULL!  | #NULL!   | #NULL! | #NULL! | #NULL! |
| 1.00             | 1.00              | 1.00    | 0.00     | 1.00   | 0.68   | -2.01  |
| #NULL!           | #NULL!            | #NULL!  | #NULL!   | #NULL! | #NULL! | #NULL! |
| #NULL!           | #NULL!            | #NULL!  | #NULL!   | #NULL! | #NULL! | #NULL! |
| #NULL!           | #NULL!            | #NULL!  | #NULL!   | #NULL! | #NULL! | #NULL! |
| 3.00             | 3.00              | 1.00    | 1.00     | 0.00   | -0.01  | 0.24   |

|        |        |        |        |        |        |        |        |        |
|--------|--------|--------|--------|--------|--------|--------|--------|--------|
|        | 3.00   |        | 3.00   | 1.00   | 1.00   | 0.00   | 0.59   | 0.75   |
| #NULL! | #NULL! | #NULL! | #NULL! | #NULL! | #NULL! | #NULL! | #NULL! | #NULL! |
|        | 1.00   |        | 1.00   | 1.00   | 0.00   | 0.00   | 0.77   | -0.54  |
|        | 4.00   |        | 3.00   | 1.00   | 1.00   | 0.00   | -0.10  | 0.75   |
|        | 3.00   |        | 3.00   | 1.00   | 1.00   | 0.00   | 0.94   | 0.06   |
| #NULL! | #NULL! | #NULL! | #NULL! | #NULL! | #NULL! | #NULL! | #NULL! | #NULL! |
| #NULL! | #NULL! | #NULL! | #NULL! | #NULL! | #NULL! | #NULL! | #NULL! | #NULL! |
|        | 1.00   |        | 1.00   | 1.00   | 0.00   | 1.00   | 0.25   | -0.63  |
| #NULL! | #NULL! | #NULL! | #NULL! | #NULL! | #NULL! | #NULL! | #NULL! | #NULL! |
|        | 2.00   |        | 2.00   | 1.00   | 1.00   | 1.00   | -0.19  | 1.45   |
|        | 1.00   |        | 1.00   | 1.00   | 0.00   | 0.00   | -0.19  | -1.92  |
|        | 3.00   |        | 3.00   | 1.00   | 1.00   | 1.00   | 0.77   | 0.67   |
| #NULL! | #NULL! | #NULL! | #NULL! | #NULL! | #NULL! | #NULL! | #NULL! | #NULL! |
| #NULL! | #NULL! | #NULL! | #NULL! | #NULL! | #NULL! | #NULL! | #NULL! | #NULL! |
|        | 1.00   |        | 1.00   | 1.00   | 0.00   | 0.00   | -1.14  | 1.70   |
|        | 0.00   |        | 0.00   | 0.00   | 0.00   | 0.00   | 1.63   | 0.75   |
|        | 0.00   |        | 0.00   | 0.00   | 0.00   | 1.00   | 0.94   | -0.11  |
| #NULL! | #NULL! | #NULL! | #NULL! | #NULL! | #NULL! | #NULL! | #NULL! | #NULL! |
|        | 2.00   |        | 2.00   | 1.00   | 1.00   | 0.00   | -1.31  | 0.41   |
| #NULL! | #NULL! | #NULL! | #NULL! | #NULL! | #NULL! | #NULL! | #NULL! | #NULL! |
|        | 1.00   |        | 1.00   | 1.00   | 0.00   | 0.00   | 1.98   | -1.40  |
| #NULL! | #NULL! | #NULL! | #NULL! | #NULL! | #NULL! | #NULL! | #NULL! | #NULL! |
| #NULL! | #NULL! | #NULL! | #NULL! | #NULL! | #NULL! | #NULL! | #NULL! | #NULL! |
|        | 0.00   |        | 0.00   | 0.00   | 0.00   | 0.00   | -0.71  | 0.15   |
|        | 1.00   |        | 1.00   | 1.00   | 0.00   | 0.00   | -0.19  | 1.36   |
| #NULL! | #NULL! | #NULL! | #NULL! | #NULL! | #NULL! | #NULL! | #NULL! | #NULL! |
|        | 4.00   |        | 4.00   | 1.00   | 1.00   | 1.00   | -0.45  | -0.02  |
| #NULL! | #NULL! | #NULL! | #NULL! | #NULL! | #NULL! | #NULL! | #NULL! | #NULL! |
| #NULL! | #NULL! | #NULL! | #NULL! | #NULL! | #NULL! | #NULL! | #NULL! | #NULL! |
|        | 1.00   |        | 1.00   | 1.00   | 0.00   | 1.00   | 1.46   | -0.54  |
|        | 1.00   |        | 1.00   | 1.00   | 0.00   | 1.00   | 1.55   | -1.66  |
|        | 0.00   |        | 0.00   | 0.00   | 0.00   | 0.00   | 0.07   | 0.06   |
| #NULL! | #NULL! | #NULL! | #NULL! | #NULL! | #NULL! | #NULL! | #NULL! | #NULL! |
| #NULL! | #NULL! | #NULL! | #NULL! | #NULL! | #NULL! | #NULL! | #NULL! | #NULL! |
|        | 1.00   |        | 1.00   | 1.00   | 0.00   | 1.00   | 0.68   | -1.23  |
| #NULL! | #NULL! | #NULL! | #NULL! | #NULL! | #NULL! | #NULL! | #NULL! | #NULL! |
| #NULL! | #NULL! | #NULL! | #NULL! | #NULL! | #NULL! | #NULL! | #NULL! | #NULL! |
| #NULL! | #NULL! | #NULL! | #NULL! | #NULL! | #NULL! | #NULL! | #NULL! | #NULL! |
|        | 1.00   |        | 1.00   | 1.00   | 0.00   | 0.00   | -2.79  | 2.65   |
|        | 2.00   |        | 1.00   | 1.00   | 1.00   | 0.00   | 0.77   | 0.06   |
| #NULL! | #NULL! | #NULL! | #NULL! | #NULL! | #NULL! | #NULL! | #NULL! | #NULL! |
| #NULL! | #NULL! | #NULL! | #NULL! | #NULL! | #NULL! | #NULL! | #NULL! | #NULL! |
| #NULL! | #NULL! | #NULL! | #NULL! | #NULL! | #NULL! | #NULL! | #NULL! | #NULL! |
| #NULL! | #NULL! | #NULL! | #NULL! | #NULL! | #NULL! | #NULL! | #NULL! | #NULL! |
|        | 4.00   |        | 3.00   | 1.00   | 1.00   | 0.00   | -0.71  | 0.06   |
|        | 2.00   |        | 2.00   | 1.00   | 1.00   | 1.00   | 0.51   | -0.71  |
|        | 2.00   |        | 2.00   | 1.00   | 1.00   | 0.00   | -0.10  | 1.36   |
| #NULL! | #NULL! | #NULL! | #NULL! | #NULL! | #NULL! | #NULL! | #NULL! | #NULL! |
| #NULL! | #NULL! | #NULL! | #NULL! | #NULL! | #NULL! | #NULL! | #NULL! | #NULL! |
| #NULL! | #NULL! | #NULL! | #NULL! | #NULL! | #NULL! | #NULL! | #NULL! | #NULL! |
| #NULL! | #NULL! | #NULL! | #NULL! | #NULL! | #NULL! | #NULL! | #NULL! | #NULL! |
| #NULL! | #NULL! | #NULL! | #NULL! | #NULL! | #NULL! | #NULL! | #NULL! | #NULL! |
|        | 0.00   |        | 0.00   | 0.00   | 0.00   | 1.00   | 0.77   | -0.45  |
| #NULL! | #NULL! | #NULL! | #NULL! | #NULL! | #NULL! | #NULL! | #NULL! | #NULL! |
| #NULL! | #NULL! | #NULL! | #NULL! | #NULL! | #NULL! | #NULL! | #NULL! | #NULL! |
|        | 2.00   |        | 1.00   | 1.00   | 1.00   | 0.00   | -0.71  | 0.24   |







|        |        |        |        |        |        |        |
|--------|--------|--------|--------|--------|--------|--------|
| #NULL! | #NULL! | #NULL! | #NULL! | #NULL! | #NULL! | #NULL! |
| 2.00   | 2.00   | 1.00   | 1.00   | 1.00   | 0.51   | -0.97  |
| 0.00   | 0.00   | 0.00   | 0.00   | 1.00   | -0.36  | 0.15   |
| #NULL! | #NULL! | #NULL! | #NULL! | #NULL! | #NULL! | #NULL! |
| 1.00   | 1.00   | 1.00   | 0.00   | 0.00   | -0.97  | 0.93   |
| 2.00   | 2.00   | 1.00   | 1.00   | 0.00   | 0.42   | 0.50   |
| #NULL! | #NULL! | #NULL! | #NULL! | #NULL! | #NULL! | #NULL! |
| 1.00   | 1.00   | 1.00   | 0.00   | 1.00   | 0.85   | -1.23  |
| #NULL! | #NULL! | #NULL! | #NULL! | #NULL! | #NULL! | #NULL! |
| 3.00   | 2.00   | 1.00   | 1.00   | 0.00   | -0.45  | 0.93   |
| #NULL! | #NULL! | #NULL! | #NULL! | #NULL! | #NULL! | #NULL! |
| 1.00   | 1.00   | 1.00   | 0.00   | 1.00   | 0.68   | 0.06   |
| #NULL! | #NULL! | #NULL! | #NULL! | #NULL! | #NULL! | #NULL! |
| #NULL! | #NULL! | #NULL! | #NULL! | #NULL! | #NULL! | #NULL! |
| #NULL! | #NULL! | #NULL! | #NULL! | #NULL! | #NULL! | #NULL! |
| #NULL! | #NULL! | #NULL! | #NULL! | #NULL! | #NULL! | #NULL! |
| 2.00   | 1.00   | 1.00   | 1.00   | 0.00   | -1.92  | 1.45   |
| #NULL! | #NULL! | #NULL! | #NULL! | #NULL! | #NULL! | #NULL! |
| #NULL! | #NULL! | #NULL! | #NULL! | #NULL! | #NULL! | #NULL! |
| #NULL! | #NULL! | #NULL! | #NULL! | #NULL! | #NULL! | #NULL! |
| #NULL! | #NULL! | #NULL! | #NULL! | #NULL! | #NULL! | #NULL! |
| #NULL! | #NULL! | #NULL! | #NULL! | #NULL! | #NULL! | #NULL! |
| #NULL! | #NULL! | #NULL! | #NULL! | #NULL! | #NULL! | #NULL! |
| 2.00   | 2.00   | 1.00   | 1.00   | 0.00   | -1.66  | -1.14  |
| #NULL! | #NULL! | #NULL! | #NULL! | #NULL! | #NULL! | #NULL! |
| 0.00   | 0.00   | 0.00   | 0.00   | 0.00   | -1.83  | 2.05   |
| 0.00   | 0.00   | 0.00   | 0.00   | 0.00   | 0.16   | 0.32   |
| 1.00   | 1.00   | 1.00   | 0.00   | 1.00   | 0.68   | 0.84   |
| #NULL! | #NULL! | #NULL! | #NULL! | #NULL! | #NULL! | #NULL! |
| #NULL! | #NULL! | #NULL! | #NULL! | #NULL! | #NULL! | #NULL! |
| 1.00   | 1.00   | 1.00   | 0.00   | 0.00   | -1.14  | 1.79   |
| #NULL! | #NULL! | #NULL! | #NULL! | #NULL! | #NULL! | #NULL! |
| #NULL! | #NULL! | #NULL! | #NULL! | #NULL! | #NULL! | #NULL! |
| #NULL! | #NULL! | #NULL! | #NULL! | #NULL! | #NULL! | #NULL! |
| 0.00   | 0.00   | 0.00   | 0.00   | 1.00   | 0.59   | -0.19  |
| #NULL! | #NULL! | #NULL! | #NULL! | #NULL! | #NULL! | #NULL! |
| #NULL! | #NULL! | #NULL! | #NULL! | #NULL! | #NULL! | #NULL! |
| #NULL! | #NULL! | #NULL! | #NULL! | #NULL! | #NULL! | #NULL! |
| #NULL! | #NULL! | #NULL! | #NULL! | #NULL! | #NULL! | #NULL! |
| #NULL! | #NULL! | #NULL! | #NULL! | #NULL! | #NULL! | #NULL! |
| #NULL! | #NULL! | #NULL! | #NULL! | #NULL! | #NULL! | #NULL! |
| 1.00   | 1.00   | 1.00   | 0.00   | 0.00   | 0.16   | 0.50   |
| #NULL! | #NULL! | #NULL! | #NULL! | #NULL! | #NULL! | #NULL! |
| 2.00   | 2.00   | 1.00   | 1.00   | 1.00   | 0.51   | -0.88  |
| 2.00   | 2.00   | 1.00   | 1.00   | 1.00   | 0.59   | -0.37  |
| #NULL! | #NULL! | #NULL! | #NULL! | #NULL! | #NULL! | #NULL! |
| #NULL! | #NULL! | #NULL! | #NULL! | #NULL! | #NULL! | #NULL! |
| #NULL! | #NULL! | #NULL! | #NULL! | #NULL! | #NULL! | #NULL! |
| #NULL! | #NULL! | #NULL! | #NULL! | #NULL! | #NULL! | #NULL! |
| #NULL! | #NULL! | #NULL! | #NULL! | #NULL! | #NULL! | #NULL! |
| 1.00   | 1.00   | 1.00   | 0.00   | 0.00   | 0.33   | -0.88  |
| #NULL! | #NULL! | #NULL! | #NULL! | #NULL! | #NULL! | #NULL! |
| #NULL! | #NULL! | #NULL! | #NULL! | #NULL! | #NULL! | #NULL! |
| #NULL! | #NULL! | #NULL! | #NULL! | #NULL! | #NULL! | #NULL! |
| 1.00   | 1.00   | 1.00   | 0.00   | 0.00   | 0.77   | 0.41   |



| COOP_Z | bmi_z  | whr_z  | pas_z  | sex_z  | tas_z  | ZNS      | ZHA      |
|--------|--------|--------|--------|--------|--------|----------|----------|
| 0.01   | -0.41  | 0.25   | 0.31   | 1.23   | -0.29  | 0.93847  | -1.39423 |
| #NULL! | #NULL! | #NULL! | #NULL! | #NULL! | #NULL! | #NULL!   | #NULL!   |
| 0.49   | 1.32   | -0.69  | -0.57  | -0.55  | -0.29  | -0.48590 | 0.84215  |
| -0.94  | -0.26  | 0.55   | 2.93   | -0.70  | -0.70  | -0.91322 | -0.36205 |
| -0.11  | 0.97   | 0.27   | -1.01  | -0.75  | 0.74   | -2.19515 | -1.39423 |
| 1.44   | -0.21  | -0.22  | 1.18   | 0.04   | -1.22  | -0.34347 | -1.56626 |
| 0.73   | -1.24  | -0.46  | -0.57  | 0.04   | -1.01  | -0.62834 | -0.53408 |
| -0.94  | -0.43  | 0.32   | -0.57  | #NULL! | -0.70  | 0.22628  | -1.30821 |
| #NULL! | #NULL! | #NULL! | #NULL! | #NULL! | #NULL! | #NULL!   | #NULL!   |
| 0.13   | 0.03   | -0.30  | 2.49   | -0.75  | -1.11  | -1.62540 | -0.62010 |
| 0.97   | 0.78   | -0.71  | 0.31   | 0.04   | -1.32  | -0.48590 | -0.01800 |
| #NULL! | #NULL! | #NULL! | #NULL! | #NULL! | #NULL! | #NULL!   | #NULL!   |
| #NULL! | #NULL! | #NULL! | #NULL! | #NULL! | #NULL! | #NULL!   | #NULL!   |
| #NULL! | #NULL! | #NULL! | #NULL! | #NULL! | #NULL! | #NULL!   | #NULL!   |
| -1.18  | -0.09  | 0.67   | -0.13  | 0.04   | 0.74   | -0.34347 | -0.27604 |
| #NULL! | #NULL! | #NULL! | #NULL! | #NULL! | #NULL! | #NULL!   | #NULL!   |
| #NULL! | #NULL! | #NULL! | #NULL! | #NULL! | #NULL! | #NULL!   | #NULL!   |
| 0.97   | -0.17  | -0.71  | -0.13  | 1.23   | 0.12   | -1.48296 | 1.01418  |
| -1.41  | 0.04   | 0.39   | -0.13  | -0.55  | -0.29  | -0.05859 | -0.27604 |
| 0.61   | -0.86  | -0.54  | -1.01  | 1.23   | 2.70   | -0.62834 | 1.10019  |
| -0.11  | 0.18   | -0.25  | 0.31   | -0.55  | -0.80  | -0.34347 | -1.99633 |
| #NULL! | #NULL! | #NULL! | #NULL! | #NULL! | #NULL! | #NULL!   | #NULL!   |
| #NULL! | #NULL! | #NULL! | #NULL! | #NULL! | #NULL! | #NULL!   | #NULL!   |
| -0.70  | -0.39  | 0.36   | -0.57  | -0.55  | 0.95   | 1.08091  | -1.05017 |
| 0.37   | -0.67  | -0.82  | -1.01  | 0.04   | -0.19  | 1.93553  | 0.15403  |
| #NULL! | #NULL! | #NULL! | #NULL! | #NULL! | #NULL! | #NULL!   | #NULL!   |
| #NULL! | #NULL! | #NULL! | #NULL! | #NULL! | #NULL! | #NULL!   | #NULL!   |
| #NULL! | #NULL! | #NULL! | #NULL! | #NULL! | #NULL! | #NULL!   | #NULL!   |
| #NULL! | #NULL! | #NULL! | #NULL! | #NULL! | #NULL! | #NULL!   | #NULL!   |
| #NULL! | #NULL! | #NULL! | #NULL! | #NULL! | #NULL! | #NULL!   | #NULL!   |
| #NULL! | #NULL! | #NULL! | #NULL! | #NULL! | #NULL! | #NULL!   | #NULL!   |
| #NULL! | #NULL! | #NULL! | #NULL! | #NULL! | #NULL! | #NULL!   | #NULL!   |
| 1.08   | -1.01  | 0.03   | 0.74   | 1.23   | -0.60  | 0.79603  | -0.79213 |
| -0.70  | -0.72  | -0.55  | -0.57  | -0.70  | -0.19  | 1.08091  | 1.44425  |
| #NULL! | #NULL! | #NULL! | #NULL! | #NULL! | #NULL! | #NULL!   | #NULL!   |
| #NULL! | #NULL! | #NULL! | #NULL! | #NULL! | #NULL! | #NULL!   | #NULL!   |
| #NULL! | #NULL! | #NULL! | #NULL! | #NULL! | #NULL! | #NULL!   | #NULL!   |
| #NULL! | #NULL! | #NULL! | #NULL! | #NULL! | #NULL! | #NULL!   | #NULL!   |
| #NULL! | #NULL! | #NULL! | #NULL! | #NULL! | #NULL! | #NULL!   | #NULL!   |
| #NULL! | #NULL! | #NULL! | #NULL! | #NULL! | #NULL! | #NULL!   | #NULL!   |
| #NULL! | #NULL! | #NULL! | #NULL! | #NULL! | #NULL! | #NULL!   | #NULL!   |
| #NULL! | #NULL! | #NULL! | #NULL! | #NULL! | #NULL! | #NULL!   | #NULL!   |
| -0.11  | -0.52  | -0.65  | -0.13  | -0.75  | -0.91  | 0.93847  | -0.10401 |
| #NULL! | #NULL! | #NULL! | #NULL! | #NULL! | #NULL! | #NULL!   | #NULL!   |
| #NULL! | #NULL! | #NULL! | #NULL! | #NULL! | #NULL! | #NULL!   | #NULL!   |
| #NULL! | #NULL! | #NULL! | #NULL! | #NULL! | #NULL! | #NULL!   | #NULL!   |
| -1.06  | 0.26   | #NULL! | 2.06   | 1.23   | -0.80  | 0.08385  | -1.99633 |
| 0.97   | -0.68  | -0.87  | 1.18   | 1.23   | -0.70  | -0.34347 | -0.36205 |
| #NULL! | #NULL! | #NULL! | #NULL! | #NULL! | #NULL! | #NULL!   | #NULL!   |
| 0.13   | -0.67  | -0.07  | 1.62   | 0.04   | -0.70  | -0.48590 | -1.65227 |
| #NULL! | #NULL! | #NULL! | #NULL! | #NULL! | #NULL! | #NULL!   | #NULL!   |
| 1.92   | -0.43  | -0.04  | -0.57  | 0.04   | -1.53  | -1.05565 | -1.99633 |
| #NULL! | #NULL! | #NULL! | #NULL! | #NULL! | #NULL! | #NULL!   | #NULL!   |
| #NULL! | #NULL! | #NULL! | #NULL! | #NULL! | #NULL! | #NULL!   | #NULL!   |
| #NULL! | #NULL! | #NULL! | #NULL! | #NULL! | #NULL! | #NULL!   | #NULL!   |
| -0.11  | 0.54   | -0.56  | -1.01  | -0.75  | -0.39  | -0.48590 | 0.24005  |

|        |        |        |        |        |        |          |          |
|--------|--------|--------|--------|--------|--------|----------|----------|
| -0.11  | -0.28  | -0.62  | -0.13  | 0.04   | 0.95   | -1.05565 | 0.75614  |
| #NULL! | #NULL! | #NULL! | #NULL! | #NULL! | #NULL! | #NULL!   | #NULL!   |
| -0.11  | 5.21   | 0.16   | -0.57  | 0.04   | -0.29  | 0.08385  | -0.53408 |
| 0.49   | -0.56  | 0.55   | 0.31   | #NULL! | -1.01  | 0.08385  | 0.75614  |
| 0.37   | -0.22  | -0.72  | -1.01  | -0.75  | -0.39  | 0.79603  | 0.06802  |
| #NULL! | #NULL! | #NULL! | #NULL! | #NULL! | #NULL! | #NULL!   | #NULL!   |
| #NULL! | #NULL! | #NULL! | #NULL! | #NULL! | #NULL! | #NULL!   | #NULL!   |
| -0.34  | -0.50  | 0.38   | -0.13  | 1.23   | -0.19  | 0.08385  | -0.62010 |
| #NULL! | #NULL! | #NULL! | #NULL! | #NULL! | #NULL! | #NULL!   | #NULL!   |
| -1.77  | -1.15  | 0.22   | 2.93   | -0.75  | 1.98   | -0.48590 | 1.44425  |
| -1.53  | -0.31  | 0.31   | 2.93   | 1.23   | -0.70  | 1.79309  | -1.91032 |
| -0.58  | -0.07  | -0.29  | 0.31   | 1.23   | -0.91  | -1.48296 | 0.67012  |
| #NULL! | #NULL! | #NULL! | #NULL! | #NULL! | #NULL! | #NULL!   | #NULL!   |
| #NULL! | #NULL! | #NULL! | #NULL! | #NULL! | #NULL! | #NULL!   | #NULL!   |
| -0.46  | -1.12  | -0.84  | 0.74   | 0.04   | 0.64   | 0.22628  | 1.70230  |
| 0.85   | -0.06  | -0.40  | -0.57  | 0.04   | 0.74   | 1.65066  | 0.75614  |
| 0.85   | -0.99  | 0.00   | -1.01  | 1.23   | -0.80  | 1.22334  | -0.10401 |
| #NULL! | #NULL! | #NULL! | #NULL! | #NULL! | #NULL! | #NULL!   | #NULL!   |
| 0.61   | -0.89  | 0.11   | 1.62   | -0.55  | -0.29  | -0.48590 | 0.41208  |
| #NULL! | #NULL! | #NULL! | #NULL! | #NULL! | #NULL! | #NULL!   | #NULL!   |
| 2.04   | -0.16  | 0.14   | 0.74   | 1.23   | -0.49  | 0.22628  | -1.39423 |
| #NULL! | #NULL! | #NULL! | #NULL! | #NULL! | #NULL! | #NULL!   | #NULL!   |
| #NULL! | #NULL! | #NULL! | #NULL! | #NULL! | #NULL! | #NULL!   | #NULL!   |
| 0.13   | 0.23   | 0.20   | -1.01  | -0.55  | 1.05   | 0.65360  | 0.15403  |
| -0.22  | 0.81   | -0.37  | 0.31   | 0.04   | 1.67   | -1.05565 | 1.35824  |
| #NULL! | #NULL! | #NULL! | #NULL! | #NULL! | #NULL! | #NULL!   | #NULL!   |
| -0.11  | 0.86   | 0.55   | -0.57  | -0.55  | 0.02   | 0.08385  | -0.01800 |
| #NULL! | #NULL! | #NULL! | #NULL! | #NULL! | #NULL! | #NULL!   | #NULL!   |
| #NULL! | #NULL! | #NULL! | #NULL! | #NULL! | #NULL! | #NULL!   | #NULL!   |
| 1.80   | 0.04   | -0.18  | -0.57  | 0.04   | -1.63  | -0.62834 | -0.53408 |
| 0.97   | 0.27   | 0.75   | 0.74   | -0.55  | -1.11  | 0.36872  | -1.65227 |
| 1.56   | -0.44  | -0.26  | 0.74   | -0.55  | -1.22  | -0.77078 | 0.06802  |
| #NULL! | #NULL! | #NULL! | #NULL! | #NULL! | #NULL! | #NULL!   | #NULL!   |
| #NULL! | #NULL! | #NULL! | #NULL! | #NULL! | #NULL! | #NULL!   | #NULL!   |
| 1.32   | -0.29  | 0.43   | -0.57  | 1.23   | -0.91  | 0.08385  | -1.22220 |
| #NULL! | #NULL! | #NULL! | #NULL! | #NULL! | #NULL! | #NULL!   | #NULL!   |
| #NULL! | #NULL! | #NULL! | #NULL! | #NULL! | #NULL! | #NULL!   | #NULL!   |
| #NULL! | #NULL! | #NULL! | #NULL! | #NULL! | #NULL! | #NULL!   | #NULL!   |
| -1.41  | -0.79  | -0.17  | -0.13  | 0.04   | 0.64   | -2.90734 | 2.64846  |
| -0.34  | -0.50  | 0.68   | 1.18   | -0.70  | -0.08  | -0.05859 | 0.06802  |
| #NULL! | #NULL! | #NULL! | #NULL! | #NULL! | #NULL! | #NULL!   | #NULL!   |
| #NULL! | #NULL! | #NULL! | #NULL! | #NULL! | #NULL! | #NULL!   | #NULL!   |
| #NULL! | #NULL! | #NULL! | #NULL! | #NULL! | #NULL! | #NULL!   | #NULL!   |
| #NULL! | #NULL! | #NULL! | #NULL! | #NULL! | #NULL! | #NULL!   | #NULL!   |
| -1.53  | 1.92   | -0.66  | -1.01  | -0.75  | 0.95   | -0.05859 | 0.06802  |
| 0.37   | 0.88   | 0.06   | 0.74   | -0.75  | -0.29  | 0.93847  | -0.70611 |
| -0.34  | -0.43  | -0.81  | -0.13  | -0.70  | 0.12   | -0.77078 | 1.35824  |
| #NULL! | #NULL! | #NULL! | #NULL! | #NULL! | #NULL! | #NULL!   | #NULL!   |
| #NULL! | #NULL! | #NULL! | #NULL! | #NULL! | #NULL! | #NULL!   | #NULL!   |
| #NULL! | #NULL! | #NULL! | #NULL! | #NULL! | #NULL! | #NULL!   | #NULL!   |
| #NULL! | #NULL! | #NULL! | #NULL! | #NULL! | #NULL! | #NULL!   | #NULL!   |
| #NULL! | #NULL! | #NULL! | #NULL! | #NULL! | #NULL! | #NULL!   | #NULL!   |
| 1.32   | -1.21  | -0.28  | 1.18   | 1.23   | 0.23   | -0.05859 | -0.44807 |
| #NULL! | #NULL! | #NULL! | #NULL! | #NULL! | #NULL! | #NULL!   | #NULL!   |
| #NULL! | #NULL! | #NULL! | #NULL! | #NULL! | #NULL! | #NULL!   | #NULL!   |
| 0.37   | 0.04   | -0.44  | -0.13  | 1.23   | -0.49  | -0.05859 | 0.24005  |







|        |        |        |        |        |        |          |          |
|--------|--------|--------|--------|--------|--------|----------|----------|
| #NULL! | #NULL! | #NULL! | #NULL! | #NULL! | #NULL! | #NULL!   | #NULL!   |
| 0.97   | 0.10   | 0.25   | 0.74   | -0.55  | -1.11  | 0.65360  | -0.96416 |
| -0.46  | 0.72   | 0.43   | -0.57  | 0.04   | 0.54   | -0.20103 | 0.15403  |
| #NULL! | #NULL! | #NULL! | #NULL! | #NULL! | #NULL! | #NULL!   | #NULL!   |
| -0.70  | -0.32  | 0.87   | -0.13  | 5.20   | 0.23   | -0.34347 | 0.92816  |
| -0.94  | -0.66  | -0.29  | -0.13  | -0.75  | -0.19  | -1.34053 | 0.49809  |
| #NULL! | #NULL! | #NULL! | #NULL! | #NULL! | #NULL! | #NULL!   | #NULL!   |
| 0.49   | 2.52   | 1.14   | 0.31   | 0.04   | -0.39  | -0.48590 | -1.22220 |
| #NULL! | #NULL! | #NULL! | #NULL! | #NULL! | #NULL! | #NULL!   | #NULL!   |
| -0.70  | 2.11   | -0.01  | 0.31   | -0.55  | 0.64   | 0.79603  | 0.92816  |
| #NULL! | #NULL! | #NULL! | #NULL! | #NULL! | #NULL! | #NULL!   | #NULL!   |
| -0.11  | -0.18  | 0.86   | 2.06   | -0.55  | -0.19  | -1.19809 | 0.06802  |
| #NULL! | #NULL! | #NULL! | #NULL! | #NULL! | #NULL! | #NULL!   | #NULL!   |
| #NULL! | #NULL! | #NULL! | #NULL! | #NULL! | #NULL! | #NULL!   | #NULL!   |
| #NULL! | #NULL! | #NULL! | #NULL! | #NULL! | #NULL! | #NULL!   | #NULL!   |
| #NULL! | #NULL! | #NULL! | #NULL! | #NULL! | #NULL! | #NULL!   | #NULL!   |
| -0.11  | -1.43  | -1.67  | -1.01  | 0.04   | 0.64   | 0.51116  | 1.44425  |
| #NULL! | #NULL! | #NULL! | #NULL! | #NULL! | #NULL! | #NULL!   | #NULL!   |
| #NULL! | #NULL! | #NULL! | #NULL! | #NULL! | #NULL! | #NULL!   | #NULL!   |
| #NULL! | #NULL! | #NULL! | #NULL! | #NULL! | #NULL! | #NULL!   | #NULL!   |
| #NULL! | #NULL! | #NULL! | #NULL! | #NULL! | #NULL! | #NULL!   | #NULL!   |
| #NULL! | #NULL! | #NULL! | #NULL! | #NULL! | #NULL! | #NULL!   | #NULL!   |
| -1.41  | -0.22  | -0.33  | -1.01  | -0.75  | 1.36   | 2.07797  | -1.13619 |
| #NULL! | #NULL! | #NULL! | #NULL! | #NULL! | #NULL! | #NULL!   | #NULL!   |
| -0.82  | -0.32  | -0.26  | 0.74   | 1.23   | 3.01   | -0.20103 | 2.04635  |
| -0.46  | -1.40  | -0.26  | -0.57  | -0.70  | 0.54   | -0.77078 | 0.32606  |
| 1.80   | 3.57   | -0.49  | -1.01  | 1.23   | -0.91  | -0.48590 | 0.84215  |
| #NULL! | #NULL! | #NULL! | #NULL! | #NULL! | #NULL! | #NULL!   | #NULL!   |
| #NULL! | #NULL! | #NULL! | #NULL! | #NULL! | #NULL! | #NULL!   | #NULL!   |
| -0.58  | 0.65   | 0.26   | -0.57  | 1.23   | 1.47   | -0.05859 | 1.78831  |
| #NULL! | #NULL! | #NULL! | #NULL! | #NULL! | #NULL! | #NULL!   | #NULL!   |
| #NULL! | #NULL! | #NULL! | #NULL! | #NULL! | #NULL! | #NULL!   | #NULL!   |
| #NULL! | #NULL! | #NULL! | #NULL! | #NULL! | #NULL! | #NULL!   | #NULL!   |
| 0.37   | -0.02  | 0.15   | -1.01  | -0.70  | -1.53  | 1.93553  | -0.19003 |
| #NULL! | #NULL! | #NULL! | #NULL! | #NULL! | #NULL! | #NULL!   | #NULL!   |
| #NULL! | #NULL! | #NULL! | #NULL! | #NULL! | #NULL! | #NULL!   | #NULL!   |
| #NULL! | #NULL! | #NULL! | #NULL! | #NULL! | #NULL! | #NULL!   | #NULL!   |
| #NULL! | #NULL! | #NULL! | #NULL! | #NULL! | #NULL! | #NULL!   | #NULL!   |
| #NULL! | #NULL! | #NULL! | #NULL! | #NULL! | #NULL! | #NULL!   | #NULL!   |
| 0.85   | 0.47   | 0.61   | -0.57  | #NULL! | 1.88   | -1.91028 | 0.49809  |
| #NULL! | #NULL! | #NULL! | #NULL! | #NULL! | #NULL! | #NULL!   | #NULL!   |
| 1.08   | 0.72   | -0.42  | -1.01  | -0.75  | -0.08  | 1.08091  | -0.87814 |
| -0.82  | -0.24  | 0.32   | -0.57  | 1.23   | 0.33   | -0.62834 | -0.36205 |
| #NULL! | #NULL! | #NULL! | #NULL! | #NULL! | #NULL! | #NULL!   | #NULL!   |
| #NULL! | #NULL! | #NULL! | #NULL! | #NULL! | #NULL! | #NULL!   | #NULL!   |
| #NULL! | #NULL! | #NULL! | #NULL! | #NULL! | #NULL! | #NULL!   | #NULL!   |
| #NULL! | #NULL! | #NULL! | #NULL! | #NULL! | #NULL! | #NULL!   | #NULL!   |
| #NULL! | #NULL! | #NULL! | #NULL! | #NULL! | #NULL! | #NULL!   | #NULL!   |
| 0.01   | 0.35   | -1.00  | 0.31   | #NULL! | -0.70  | 1.36578  | -0.87814 |
| #NULL! | #NULL! | #NULL! | #NULL! | #NULL! | #NULL! | #NULL!   | #NULL!   |
| #NULL! | #NULL! | #NULL! | #NULL! | #NULL! | #NULL! | #NULL!   | #NULL!   |
| #NULL! | #NULL! | #NULL! | #NULL! | #NULL! | #NULL! | #NULL!   | #NULL!   |
| #NULL! | #NULL! | #NULL! | #NULL! | #NULL! | #NULL! | #NULL!   | #NULL!   |
| 1.56   | -1.21  | -0.71  | -0.57  | -0.70  | -0.08  | -0.62834 | 0.41208  |



| ZRD      | Zpersist | ZSD      | ZCOOP    | ZSELF    | age    | NS_diff | HA_diff |
|----------|----------|----------|----------|----------|--------|---------|---------|
| -0.63362 | -0.39361 | 1.27772  | 0.01092  | -0.65296 | 63.00  | -6.00   | 4.00    |
| #NULL!   | #NULL!   | #NULL!   | #NULL!   | #NULL!   | 65.00  | 8.68    | -4.00   |
| -0.95441 | -0.28616 | 0.15551  | 0.48485  | -0.45665 | 63.00  | -2.00   | 6.00    |
| 0.11489  | 0.78837  | 0.06918  | -0.93692 | 1.01563  | #NULL! | #NULL!  | #NULL!  |
| -2.55837 | 0.68092  | 1.10507  | -0.10756 | -1.24187 | 63.00  | -3.00   | 7.00    |
| 0.64955  | 0.89583  | 1.62301  | 1.43269  | 0.23041  | #NULL! | #NULL!  | #NULL!  |
| 0.64955  | 0.78837  | 1.62301  | 0.72181  | 0.03411  | 49.00  | 6.00    | 3.00    |
| -0.52669 | 1.97036  | 1.36404  | -0.93692 | -1.34002 | 78.00  | -6.00   | 3.00    |
| #NULL!   | #NULL!   | #NULL!   | #NULL!   | #NULL!   | 59.00  | -1.75   | -2.33   |
| 1.71885  | 0.14365  | 0.41448  | 0.12940  | 1.31009  | #NULL! | #NULL!  | #NULL!  |
| -0.31283 | -0.82343 | 1.01875  | 0.95877  | -0.65296 | 68.00  | 1.00    | -3.00   |
| #NULL!   | #NULL!   | #NULL!   | #NULL!   | #NULL!   | 69.00  | -2.00   | 3.00    |
| #NULL!   | #NULL!   | #NULL!   | #NULL!   | #NULL!   | 52.00  | -5.00   | 6.00    |
| #NULL!   | #NULL!   | #NULL!   | #NULL!   | #NULL!   | #NULL! | #NULL!  | #NULL!  |
| -0.84748 | 0.57347  | -0.62141 | -1.17388 | 0.62302  | 82.00  | -3.00   | 4.00    |
| #NULL!   | #NULL!   | #NULL!   | #NULL!   | #NULL!   | 52.00  | -5.00   | -3.00   |
| #NULL!   | #NULL!   | #NULL!   | #NULL!   | #NULL!   | 70.00  | 5.00    | 1.00    |
| 0.00796  | -3.07995 | 1.62301  | 0.95877  | -2.02709 | 72.00  | 4.00    | 3.00    |
| -1.06134 | -0.28616 | -1.65730 | -1.41084 | -1.14372 | 77.00  | -6.84   | 3.00    |
| -1.48907 | -0.28616 | -0.10347 | 0.60333  | -1.04557 | 72.00  | 0.00    | -13.00  |
| -0.63362 | 0.25111  | 0.84610  | -0.10756 | -1.53633 | 51.00  | 4.00    | 0.00    |
| #NULL!   | #NULL!   | #NULL!   | #NULL!   | #NULL!   | 68.00  | 3.00    | -0.21   |
| #NULL!   | #NULL!   | #NULL!   | #NULL!   | #NULL!   | 59.00  | -3.00   | -3.00   |
| -1.80986 | -0.28616 | 0.50080  | -0.69996 | -1.24187 | 46.00  | 4.00    | 7.00    |
| -0.09897 | -0.39361 | -0.01714 | 0.36637  | -1.24187 | 64.00  | -1.00   | -1.00   |
| #NULL!   | #NULL!   | #NULL!   | #NULL!   | #NULL!   | 65.00  | 2.00    | 0.00    |
| #NULL!   | #NULL!   | #NULL!   | #NULL!   | #NULL!   | 62.00  | -2.00   | 10.00   |
| #NULL!   | #NULL!   | #NULL!   | #NULL!   | #NULL!   | 51.00  | 3.00    | -9.00   |
| #NULL!   | #NULL!   | #NULL!   | #NULL!   | #NULL!   | #NULL! | #NULL!  | #NULL!  |
| #NULL!   | #NULL!   | #NULL!   | #NULL!   | #NULL!   | 61.00  | -1.00   | 5.00    |
| #NULL!   | #NULL!   | #NULL!   | #NULL!   | #NULL!   | 68.00  | 7.00    | 1.00    |
| -0.09897 | -0.82343 | 1.62301  | 1.07725  | -2.02709 | 74.00  | -3.00   | 4.00    |
| 0.00796  | -1.46815 | -0.62141 | -0.69996 | -1.04557 | 55.00  | -1.00   | -10.00  |
| #NULL!   | #NULL!   | #NULL!   | #NULL!   | #NULL!   | 63.00  | -6.00   | -2.00   |
| #NULL!   | #NULL!   | #NULL!   | #NULL!   | #NULL!   | #NULL! | #NULL!  | #NULL!  |
| #NULL!   | #NULL!   | #NULL!   | #NULL!   | #NULL!   | #NULL! | #NULL!  | #NULL!  |
| #NULL!   | #NULL!   | #NULL!   | #NULL!   | #NULL!   | #NULL! | #NULL!  | #NULL!  |
| #NULL!   | #NULL!   | #NULL!   | #NULL!   | #NULL!   | #NULL! | #NULL!  | #NULL!  |
| #NULL!   | #NULL!   | #NULL!   | #NULL!   | #NULL!   | #NULL! | #NULL!  | #NULL!  |
| #NULL!   | #NULL!   | #NULL!   | #NULL!   | #NULL!   | 62.00  | 2.00    | -7.00   |
| #NULL!   | #NULL!   | #NULL!   | #NULL!   | #NULL!   | 95.00  | -4.00   | 9.00    |
| 1.29113  | -0.60852 | 0.24183  | -0.10756 | 0.52487  | 80.00  | -2.00   | 4.00    |
| #NULL!   | #NULL!   | #NULL!   | #NULL!   | #NULL!   | 64.00  | -5.00   | -7.00   |
| #NULL!   | #NULL!   | #NULL!   | #NULL!   | #NULL!   | 69.00  | -1.00   | 2.00    |
| #NULL!   | #NULL!   | #NULL!   | #NULL!   | #NULL!   | #NULL! | #NULL!  | #NULL!  |
| 1.07727  | 2.50762  | 0.41448  | -1.05540 | 0.52487  | 46.00  | -5.00   | 4.00    |
| 0.97034  | -0.50107 | 1.36404  | 0.95877  | 0.42672  | 64.00  | 3.00    | 1.00    |
| #NULL!   | #NULL!   | #NULL!   | #NULL!   | #NULL!   | 59.00  | 7.00    | 12.00   |
| 0.64955  | 2.18526  | 1.10507  | 0.12940  | -0.16219 | 58.00  | -3.00   | -4.00   |
| #NULL!   | #NULL!   | #NULL!   | #NULL!   | #NULL!   | 60.00  | -9.00   | 2.00    |
| 0.54262  | 1.43309  | 0.67345  | 1.90661  | -0.26035 | 68.00  | 1.00    | 6.00    |
| #NULL!   | #NULL!   | #NULL!   | #NULL!   | #NULL!   | 66.00  | 5.00    | -0.11   |
| #NULL!   | #NULL!   | #NULL!   | #NULL!   | #NULL!   | 66.00  | -7.00   | 3.00    |
| #NULL!   | #NULL!   | #NULL!   | #NULL!   | #NULL!   | 72.00  | 0.00    | -3.00   |
| -0.09897 | -0.50107 | -0.01714 | -0.10756 | -0.75111 | 62.00  | 4.00    | 1.00    |

|          |          |          |          |          |        |        |        |
|----------|----------|----------|----------|----------|--------|--------|--------|
| -0.95441 | -0.28616 | 0.58713  | -0.10756 | -1.24187 | 69.00  | -1.00  | 0.00   |
| #NULL!   | #NULL!   | #NULL!   | #NULL!   | #NULL!   | 63.00  | 5.00   | -7.00  |
| 0.64955  | 0.89583  | 0.75977  | -0.10756 | 0.03411  | 49.00  | 4.00   | 5.00   |
| 0.75648  | 1.21818  | -0.10347 | 0.48485  | 1.80085  | 68.00  | 0.00   | -4.00  |
| -0.41976 | 0.68092  | 0.93242  | 0.36637  | -0.35850 | 68.00  | -5.00  | -1.00  |
| #NULL!   | #NULL!   | #NULL!   | #NULL!   | #NULL!   | 67.00  | -1.00  | 1.00   |
| #NULL!   | #NULL!   | #NULL!   | #NULL!   | #NULL!   | 69.00  | -5.00  | 7.00   |
| 0.32876  | -0.39361 | 0.24183  | -0.34452 | -0.75111 | 65.00  | 1.00   | 10.00  |
| #NULL!   | #NULL!   | #NULL!   | #NULL!   | #NULL!   | 46.00  | 0.00   | 10.00  |
| -1.59600 | -0.39361 | -0.18979 | -1.76628 | -0.45665 | 78.00  | 3.00   | 1.00   |
| 1.71885  | 0.68092  | -0.18979 | -1.52932 | 1.21194  | 76.00  | 0.00   | -1.00  |
| 0.64955  | -0.50107 | 0.75977  | -0.58148 | -1.24187 | 75.00  | 3.00   | 11.00  |
| #NULL!   | #NULL!   | #NULL!   | #NULL!   | #NULL!   | 77.00  | 2.00   | 11.00  |
| #NULL!   | #NULL!   | #NULL!   | #NULL!   | #NULL!   | 77.00  | 6.00   | 5.00   |
| 0.00796  | -0.71597 | -1.13935 | -0.46300 | 1.11378  | 62.00  | -2.00  | -3.00  |
| -0.41976 | -2.54268 | 1.62301  | 0.84029  | -0.45665 | 46.00  | -4.00  | -2.00  |
| -1.16828 | 0.25111  | 0.93242  | 0.84029  | -0.45665 | 60.00  | -3.00  | -7.00  |
| #NULL!   | #NULL!   | #NULL!   | #NULL!   | #NULL!   | 57.00  | 0.00   | 6.00   |
| 1.50499  | 0.68092  | -1.31200 | 0.60333  | 0.23041  | 56.00  | 9.00   | -2.00  |
| #NULL!   | #NULL!   | #NULL!   | #NULL!   | #NULL!   | 53.00  | 7.00   | -4.47  |
| 0.22182  | -1.79051 | 1.96831  | 2.02509  | -1.14372 | 55.00  | 4.00   | 13.00  |
| #NULL!   | #NULL!   | #NULL!   | #NULL!   | #NULL!   | 65.00  | -3.00  | 9.00   |
| #NULL!   | #NULL!   | #NULL!   | #NULL!   | #NULL!   | 47.00  | -4.00  | 10.00  |
| -1.27521 | 0.25111  | -0.70773 | 0.12940  | -0.16219 | 56.00  | 5.00   | 11.00  |
| -0.52669 | -0.17871 | -0.18979 | -0.22604 | -0.06404 | 60.00  | 3.00   | 2.00   |
| #NULL!   | #NULL!   | #NULL!   | #NULL!   | #NULL!   | 61.00  | -3.00  | -3.00  |
| -0.74055 | 0.35856  | -0.44876 | -0.10756 | -0.55480 | 61.00  | 1.00   | 0.00   |
| #NULL!   | #NULL!   | #NULL!   | #NULL!   | #NULL!   | 52.00  | 1.00   | 2.00   |
| #NULL!   | #NULL!   | #NULL!   | #NULL!   | #NULL!   | 78.00  | 2.00   | 1.00   |
| 0.43569  | 1.43309  | 1.45036  | 1.78813  | 1.70270  | 51.00  | 2.00   | 9.00   |
| 0.00796  | -0.39361 | 1.53669  | 0.95877  | 1.21194  | 55.00  | 5.00   | -4.00  |
| 0.32876  | 0.89583  | 0.06918  | 1.55117  | 1.21194  | 58.00  | 1.00   | -5.00  |
| #NULL!   | #NULL!   | #NULL!   | #NULL!   | #NULL!   | 53.00  | -2.00  | 5.00   |
| #NULL!   | #NULL!   | #NULL!   | #NULL!   | #NULL!   | 59.00  | 2.00   | -7.00  |
| 0.22182  | 0.25111  | 0.67345  | 1.31421  | -0.65296 | 61.00  | -8.00  | 3.00   |
| #NULL!   | #NULL!   | #NULL!   | #NULL!   | #NULL!   | #NULL! | #NULL! | #NULL! |
| #NULL!   | #NULL!   | #NULL!   | #NULL!   | #NULL!   | 57.00  | 6.00   | 1.00   |
| #NULL!   | #NULL!   | #NULL!   | #NULL!   | #NULL!   | #NULL! | #NULL! | #NULL! |
| -0.95441 | -0.28616 | -2.77951 | -1.41084 | -1.53633 | 49.00  | 4.00   | -3.00  |
| -0.95441 | -0.28616 | 0.75977  | -0.34452 | -0.94741 | 70.00  | -2.00  | 3.00   |
| #NULL!   | #NULL!   | #NULL!   | #NULL!   | #NULL!   | 67.00  | -2.00  | 7.00   |
| #NULL!   | #NULL!   | #NULL!   | #NULL!   | #NULL!   | 59.00  | 0.16   | -0.33  |
| #NULL!   | #NULL!   | #NULL!   | #NULL!   | #NULL!   | 59.00  | -2.00  | 0.00   |
| #NULL!   | #NULL!   | #NULL!   | #NULL!   | #NULL!   | 70.00  | 0.00   | 6.00   |
| -0.95441 | -0.39361 | -0.70773 | -1.52932 | 0.42672  | 54.00  | -2.00  | 3.00   |
| -1.16828 | -0.50107 | 0.50080  | 0.36637  | -0.94741 | 75.00  | -1.00  | 6.00   |
| -0.31283 | 0.68092  | -0.10347 | -0.34452 | 0.42672  | 60.00  | -2.00  | -1.00  |
| #NULL!   | #NULL!   | #NULL!   | #NULL!   | #NULL!   | 52.00  | 0.00   | 4.00   |
| #NULL!   | #NULL!   | #NULL!   | #NULL!   | #NULL!   | #NULL! | #NULL! | #NULL! |
| #NULL!   | #NULL!   | #NULL!   | #NULL!   | #NULL!   | 50.00  | -2.00  | -12.00 |
| #NULL!   | #NULL!   | #NULL!   | #NULL!   | #NULL!   | 73.00  | -3.00  | 2.00   |
| #NULL!   | #NULL!   | #NULL!   | #NULL!   | #NULL!   | 50.00  | 3.00   | -5.00  |
| 2.46737  | 1.86290  | 0.75977  | 1.31421  | -0.35850 | 62.00  | 2.00   | 7.00   |
| #NULL!   | #NULL!   | #NULL!   | #NULL!   | #NULL!   | 49.00  | -3.00  | -1.00  |
| #NULL!   | #NULL!   | #NULL!   | #NULL!   | #NULL!   | #NULL! | #NULL! | #NULL! |
| 0.11489  | -1.57560 | -0.70773 | 0.36637  | 0.23041  | 64.00  | 1.00   | 4.00   |

|          |          |          |          |          |        |        |        |
|----------|----------|----------|----------|----------|--------|--------|--------|
| #NULL!   | #NULL!   | #NULL!   | #NULL!   | #NULL!   | 64.00  | -9.00  | -3.00  |
| -1.06134 | -0.17871 | 0.93242  | 0.12940  | -1.53633 | 72.00  | 3.00   | -2.00  |
| #NULL!   | #NULL!   | #NULL!   | #NULL!   | #NULL!   | 48.00  | 7.00   | 7.00   |
| -2.02372 | -0.60852 | 0.41448  | -1.17388 | -1.53633 | 62.00  | 0.00   | 6.00   |
| #NULL!   | #NULL!   | #NULL!   | #NULL!   | #NULL!   | 63.00  | 4.00   | 0.00   |
| #NULL!   | #NULL!   | #NULL!   | #NULL!   | #NULL!   | 87.00  | 2.00   | -3.00  |
| #NULL!   | #NULL!   | #NULL!   | #NULL!   | #NULL!   | 64.00  | 2.26   | 3.63   |
| #NULL!   | #NULL!   | #NULL!   | #NULL!   | #NULL!   | #NULL! | #NULL! | #NULL! |
| #NULL!   | #NULL!   | #NULL!   | #NULL!   | #NULL!   | 51.00  | -8.00  | 5.68   |
| -2.13065 | -0.50107 | 0.24183  | 0.24788  | -0.65296 | 47.00  | 4.00   | 1.00   |
| #NULL!   | #NULL!   | #NULL!   | #NULL!   | #NULL!   | 58.00  | 0.00   | 3.00   |
| #NULL!   | #NULL!   | #NULL!   | #NULL!   | #NULL!   | 61.00  | 1.00   | -7.00  |
| -0.74055 | 0.14365  | -0.18979 | -1.05540 | -0.94741 | 69.00  | 6.00   | -3.00  |
| #NULL!   | #NULL!   | #NULL!   | #NULL!   | #NULL!   | #NULL! | #NULL! | #NULL! |
| #NULL!   | #NULL!   | #NULL!   | #NULL!   | #NULL!   | 57.00  | 2.00   | -1.00  |
| -0.52669 | 0.25111  | -0.88038 | -1.52932 | 0.13226  | 76.00  | -2.00  | -1.00  |
| #NULL!   | #NULL!   | #NULL!   | #NULL!   | #NULL!   | 62.00  | 7.00   | -3.00  |
| #NULL!   | #NULL!   | #NULL!   | #NULL!   | #NULL!   | 58.00  | -1.00  | -4.00  |
| -1.16828 | -0.93088 | -0.18979 | 0.01092  | 0.23041  | 73.00  | 1.00   | -10.00 |
| 1.18420  | 0.57347  | -0.27611 | -0.81844 | 0.81933  | #NULL! | #NULL! | #NULL! |
| #NULL!   | #NULL!   | #NULL!   | #NULL!   | #NULL!   | 59.00  | -5.00  | -7.00  |
| -0.95441 | -0.07125 | 0.41448  | -0.69996 | -0.94741 | 49.00  | 7.00   | -7.00  |
| #NULL!   | #NULL!   | #NULL!   | #NULL!   | #NULL!   | 59.00  | -8.00  | 5.00   |
| #NULL!   | #NULL!   | #NULL!   | #NULL!   | #NULL!   | 46.00  | 6.00   | -5.00  |
| 0.22182  | 1.32564  | 0.41448  | 0.72181  | -0.55480 | 64.00  | -11.00 | -6.00  |
| -1.27521 | 0.35856  | -0.96671 | 0.12940  | -1.53633 | 46.00  | 2.00   | -2.00  |
| 1.18420  | 0.25111  | 2.05463  | 2.26205  | 1.99715  | #NULL! | #NULL! | #NULL! |
| 1.29113  | 1.21818  | -1.05303 | 1.19573  | -1.43817 | 57.00  | 3.00   | -9.00  |
| -0.52669 | 0.25111  | 1.01875  | -0.46300 | 0.03411  | 67.00  | 0.00   | -3.00  |
| #NULL!   | #NULL!   | #NULL!   | #NULL!   | #NULL!   | 55.00  | 4.00   | 0.00   |
| #NULL!   | #NULL!   | #NULL!   | #NULL!   | #NULL!   | 56.00  | 3.00   | -3.68  |
| 1.39806  | 1.97036  | 2.22728  | 0.72181  | -1.73263 | 45.00  | -5.00  | 7.00   |
| #NULL!   | #NULL!   | #NULL!   | #NULL!   | #NULL!   | 70.00  | 3.00   | 2.84   |
| #NULL!   | #NULL!   | #NULL!   | #NULL!   | #NULL!   | 66.00  | -3.00  | 2.00   |
| 0.00796  | -1.25324 | -0.62141 | -0.46300 | -0.55480 | 73.00  | -1.00  | -6.00  |
| -0.95441 | -0.17871 | 1.62301  | 0.72181  | 0.72118  | 73.00  | 2.00   | -1.58  |
| #NULL!   | #NULL!   | #NULL!   | #NULL!   | #NULL!   | 78.00  | 3.00   | -2.00  |
| -0.09897 | 0.57347  | -0.70773 | 0.12940  | 1.01563  | 55.00  | 1.00   | -1.00  |
| -0.95441 | 0.25111  | 0.24183  | -0.10756 | -1.24187 | 65.00  | -2.00  | 6.00   |
| #NULL!   | #NULL!   | #NULL!   | #NULL!   | #NULL!   | 58.00  | -7.67  | -7.38  |
| #NULL!   | #NULL!   | #NULL!   | #NULL!   | #NULL!   | 71.00  | -3.00  | 11.00  |
| -0.41976 | -1.25324 | -0.70773 | -1.29236 | -0.55480 | 52.00  | -7.00  | -6.68  |
| -0.09897 | -0.50107 | -2.08892 | -0.10756 | 0.52487  | 47.00  | 1.00   | -1.21  |
| 0.22182  | -0.93088 | 0.24183  | -0.69996 | 0.23041  | 55.00  | 2.00   | -11.00 |
| #NULL!   | #NULL!   | #NULL!   | #NULL!   | #NULL!   | 67.00  | 6.00   | -3.00  |
| #NULL!   | #NULL!   | #NULL!   | #NULL!   | #NULL!   | 67.00  | 1.00   | 2.00   |
| #NULL!   | #NULL!   | #NULL!   | #NULL!   | #NULL!   | #NULL! | #NULL! | #NULL! |
| -1.27521 | 0.14365  | 0.67345  | 1.19573  | 0.81933  | #NULL! | #NULL! | #NULL! |
| #NULL!   | #NULL!   | #NULL!   | #NULL!   | #NULL!   | 55.00  | -1.00  | 0.00   |
| 0.86341  | -0.82343 | 0.32815  | 0.48485  | 1.80085  | 58.00  | 7.00   | -5.11  |
| #NULL!   | #NULL!   | #NULL!   | #NULL!   | #NULL!   | 74.00  | -11.32 | -3.00  |
| -0.09897 | -1.14579 | -0.79406 | -1.29236 | -0.55480 | 69.00  | -6.00  | -1.05  |
| #NULL!   | #NULL!   | #NULL!   | #NULL!   | #NULL!   | 53.00  | 1.00   | 8.00   |
| #NULL!   | #NULL!   | #NULL!   | #NULL!   | #NULL!   | 57.00  | 3.00   | 1.00   |
| #NULL!   | #NULL!   | #NULL!   | #NULL!   | #NULL!   | 54.00  | -2.00  | 0.00   |
| #NULL!   | #NULL!   | #NULL!   | #NULL!   | #NULL!   | 53.00  | -4.00  | 5.00   |

|          |          |          |          |          |        |        |        |
|----------|----------|----------|----------|----------|--------|--------|--------|
| 0.22182  | -0.07125 | -0.88038 | 0.36637  | -0.06404 | #NULL! | #NULL! | #NULL! |
| 1.82579  | 1.43309  | 1.01875  | -0.34452 | 1.21194  | 50.00  | 4.00   | -9.00  |
| 0.64955  | 1.54054  | 0.93242  | 1.78813  | 0.52487  | 55.00  | 6.00   | -7.00  |
| 0.22182  | -0.07125 | -1.13935 | 0.01092  | 0.52487  | 69.00  | 1.00   | -8.68  |
| #NULL!   | #NULL!   | #NULL!   | #NULL!   | #NULL!   | 55.00  | 0.00   | 6.21   |
| -0.20590 | -0.93088 | -0.10347 | 1.31421  | 1.11378  | 70.00  | -5.11  | -9.00  |
| #NULL!   | #NULL!   | #NULL!   | #NULL!   | #NULL!   | 56.00  | -2.00  | -1.00  |
| #NULL!   | #NULL!   | #NULL!   | #NULL!   | #NULL!   | 48.00  | 0.00   | -9.00  |
| #NULL!   | #NULL!   | #NULL!   | #NULL!   | #NULL!   | 69.00  | -10.00 | 14.00  |
| #NULL!   | #NULL!   | #NULL!   | #NULL!   | #NULL!   | 66.00  | 4.00   | -2.00  |
| #NULL!   | #NULL!   | #NULL!   | #NULL!   | #NULL!   | 77.00  | -3.00  | -2.00  |
| 0.86341  | 0.89583  | -1.22568 | 0.24788  | 0.62302  | 48.00  | -3.00  | 6.00   |
| 1.07727  | 1.64800  | 0.32815  | 0.48485  | 1.01563  | 59.00  | 6.00   | -11.00 |
| #NULL!   | #NULL!   | #NULL!   | #NULL!   | #NULL!   | 51.00  | 2.00   | -4.00  |
| #NULL!   | #NULL!   | #NULL!   | #NULL!   | #NULL!   | 61.00  | -9.00  | -16.44 |
| -1.38214 | -3.72467 | -3.03848 | -1.88477 | -0.94741 | 67.00  | -17.00 | -7.00  |
| -0.84748 | -1.14579 | -0.96671 | -0.81844 | -0.26035 | 69.00  | -4.00  | -5.00  |
| #NULL!   | #NULL!   | #NULL!   | #NULL!   | #NULL!   | 69.00  | -1.00  | 0.00   |
| #NULL!   | #NULL!   | #NULL!   | #NULL!   | #NULL!   | 68.00  | -4.00  | 1.00   |
| #NULL!   | #NULL!   | #NULL!   | #NULL!   | #NULL!   | 77.00  | -2.00  | -1.00  |
| #NULL!   | #NULL!   | #NULL!   | #NULL!   | #NULL!   | 75.00  | 0.00   | 5.00   |
| #NULL!   | #NULL!   | #NULL!   | #NULL!   | #NULL!   | 67.00  | -6.00  | -3.00  |
| #NULL!   | #NULL!   | #NULL!   | #NULL!   | #NULL!   | 49.00  | 2.00   | 2.00   |
| 0.32876  | 0.57347  | 0.50080  | 0.84029  | -0.06404 | 52.00  | 3.00   | -13.00 |
| #NULL!   | #NULL!   | #NULL!   | #NULL!   | #NULL!   | 69.00  | -7.68  | 0.00   |
| #NULL!   | #NULL!   | #NULL!   | #NULL!   | #NULL!   | 68.00  | 3.00   | 6.00   |
| #NULL!   | #NULL!   | #NULL!   | #NULL!   | #NULL!   | 54.00  | 1.00   | 2.00   |
| #NULL!   | #NULL!   | #NULL!   | #NULL!   | #NULL!   | 60.00  | -5.00  | 3.00   |
| 0.32876  | -0.28616 | -0.01714 | 0.01092  | 1.40824  | 69.00  | 4.00   | -12.00 |
| #NULL!   | #NULL!   | #NULL!   | #NULL!   | #NULL!   | 53.00  | -1.00  | -2.00  |
| #NULL!   | #NULL!   | #NULL!   | #NULL!   | #NULL!   | 46.00  | -1.00  | 2.00   |
| #NULL!   | #NULL!   | #NULL!   | #NULL!   | #NULL!   | 80.00  | 6.00   | -3.00  |
| #NULL!   | #NULL!   | #NULL!   | #NULL!   | #NULL!   | 79.00  | -2.00  | 2.00   |
| #NULL!   | #NULL!   | #NULL!   | #NULL!   | #NULL!   | 61.00  | -7.00  | 8.00   |
| 0.00796  | -1.46815 | -1.48465 | 0.48485  | -0.75111 | 61.00  | 5.00   | 0.00   |
| #NULL!   | #NULL!   | #NULL!   | #NULL!   | #NULL!   | 75.00  | 4.00   | -5.00  |
| -0.41976 | 0.03620  | -0.36244 | -1.17388 | -0.75111 | 66.00  | -4.00  | 1.00   |
| 0.22182  | -0.93088 | -3.29745 | 0.48485  | 0.52487  | 45.00  | 3.00   | -14.00 |
| -2.02372 | 0.78837  | -1.39833 | -0.81844 | -0.65296 | #NULL! | #NULL! | #NULL! |
| 0.75648  | -1.46815 | 0.06918  | 1.66965  | 1.40824  | 70.00  | -1.00  | 11.00  |
| #NULL!   | #NULL!   | #NULL!   | #NULL!   | #NULL!   | 78.00  | -3.00  | 5.00   |
| #NULL!   | #NULL!   | #NULL!   | #NULL!   | #NULL!   | 59.00  | 7.00   | 9.00   |
| #NULL!   | #NULL!   | #NULL!   | #NULL!   | #NULL!   | 68.00  | 0.00   | 2.00   |
| #NULL!   | #NULL!   | #NULL!   | #NULL!   | #NULL!   | #NULL! | #NULL! | #NULL! |
| 0.86341  | 0.46601  | -0.27611 | 0.24788  | 0.42672  | 59.00  | 5.00   | -1.00  |
| #NULL!   | #NULL!   | #NULL!   | #NULL!   | #NULL!   | 55.00  | -1.00  | -4.00  |
| #NULL!   | #NULL!   | #NULL!   | #NULL!   | #NULL!   | 60.00  | -3.00  | -2.00  |
| 0.32876  | -2.22032 | 0.06918  | -0.46300 | -0.84926 | 75.00  | -3.00  | 1.00   |
| 0.32876  | 0.03620  | 0.50080  | 0.60333  | 0.32857  | 45.00  | 3.00   | -5.00  |
| -1.70293 | -0.07125 | -1.05303 | 0.36637  | 2.38976  | 54.00  | 2.00   | -10.00 |
| #NULL!   | #NULL!   | #NULL!   | #NULL!   | #NULL!   | #NULL! | #NULL! | #NULL! |
| 0.22182  | 1.32564  | -1.31200 | -0.58148 | 1.50639  | 63.00  | -8.00  | 2.00   |
| #NULL!   | #NULL!   | #NULL!   | #NULL!   | #NULL!   | 73.00  | -4.00  | 5.00   |
| -0.95441 | -0.71597 | -2.00259 | -1.05540 | -1.53633 | 51.00  | -9.30  | -9.79  |
| #NULL!   | #NULL!   | #NULL!   | #NULL!   | #NULL!   | 57.00  | -3.00  | -2.00  |
| #NULL!   | #NULL!   | #NULL!   | #NULL!   | #NULL!   | 50.00  | -4.05  | -3.00  |

|          |          |          |          |          |        |        |        |
|----------|----------|----------|----------|----------|--------|--------|--------|
| #NULL!   | #NULL!   | #NULL!   | #NULL!   | #NULL!   | 70.00  | 2.00   | -9.00  |
| 2.36044  | 0.25111  | 0.50080  | 0.95877  | 1.70270  | 57.00  | 12.00  | 7.00   |
| -0.41976 | -0.93088 | -0.36244 | -0.46300 | -0.65296 | 50.00  | 6.00   | 2.00   |
| #NULL!   | #NULL!   | #NULL!   | #NULL!   | #NULL!   | 71.00  | 0.00   | 2.00   |
| 0.32876  | -1.46815 | -0.96671 | -0.69996 | -0.16219 | 51.00  | 2.00   | -5.00  |
| -1.16828 | 0.35856  | 0.41448  | -0.93692 | -1.04557 | 68.00  | -0.37  | -5.00  |
| #NULL!   | #NULL!   | #NULL!   | #NULL!   | #NULL!   | 66.00  | 2.00   | 4.00   |
| -1.80986 | 2.18526  | 0.84610  | 0.48485  | -1.14372 | 77.00  | 2.00   | 4.00   |
| #NULL!   | #NULL!   | #NULL!   | #NULL!   | #NULL!   | 56.00  | 2.00   | -9.00  |
| -0.41976 | -0.60852 | -0.44876 | -0.69996 | -0.06404 | 55.00  | 3.00   | -2.00  |
| #NULL!   | #NULL!   | #NULL!   | #NULL!   | #NULL!   | 56.00  | -1.00  | 5.00   |
| -1.70293 | 0.78837  | 0.67345  | -0.10756 | -0.26035 | 76.00  | 0.00   | -4.00  |
| #NULL!   | #NULL!   | #NULL!   | #NULL!   | #NULL!   | 59.00  | 1.00   | 4.47   |
| #NULL!   | #NULL!   | #NULL!   | #NULL!   | #NULL!   | 54.00  | 0.00   | 13.00  |
| #NULL!   | #NULL!   | #NULL!   | #NULL!   | #NULL!   | 47.00  | 2.00   | 0.00   |
| #NULL!   | #NULL!   | #NULL!   | #NULL!   | #NULL!   | 64.00  | -15.00 | 9.05   |
| 0.54262  | 0.35856  | -1.91627 | -0.10756 | 0.62302  | 56.00  | -9.00  | -3.74  |
| #NULL!   | #NULL!   | #NULL!   | #NULL!   | #NULL!   | 54.00  | 0.00   | -3.00  |
| #NULL!   | #NULL!   | #NULL!   | #NULL!   | #NULL!   | 82.00  | 1.00   | -10.00 |
| #NULL!   | #NULL!   | #NULL!   | #NULL!   | #NULL!   | 52.00  | -5.00  | -1.00  |
| #NULL!   | #NULL!   | #NULL!   | #NULL!   | #NULL!   | 59.00  | 6.00   | 7.00   |
| #NULL!   | #NULL!   | #NULL!   | #NULL!   | #NULL!   | 55.00  | 3.00   | -6.00  |
| #NULL!   | #NULL!   | #NULL!   | #NULL!   | #NULL!   | #NULL! | #NULL! | #NULL! |
| 0.97034  | 1.00328  | -1.65730 | -1.41084 | 1.89900  | 56.00  | -4.00  | 12.68  |
| #NULL!   | #NULL!   | #NULL!   | #NULL!   | #NULL!   | 59.00  | 4.00   | -3.00  |
| -1.70293 | -0.82343 | -1.82995 | -0.81844 | -1.14372 | 66.00  | 3.00   | -7.00  |
| -0.95441 | 0.25111  | 0.15551  | -0.46300 | -0.45665 | 53.00  | 0.00   | 3.00   |
| 0.11489  | 0.46601  | 0.67345  | 1.78813  | 0.03411  | 50.00  | -7.00  | -1.00  |
| #NULL!   | #NULL!   | #NULL!   | #NULL!   | #NULL!   | 63.00  | 3.00   | -6.00  |
| #NULL!   | #NULL!   | #NULL!   | #NULL!   | #NULL!   | #NULL! | #NULL! | #NULL! |
| 0.64955  | -0.07125 | -1.13935 | -0.58148 | -0.06404 | 48.00  | -7.00  | 12.00  |
| #NULL!   | #NULL!   | #NULL!   | #NULL!   | #NULL!   | 70.00  | 2.00   | 4.00   |
| #NULL!   | #NULL!   | #NULL!   | #NULL!   | #NULL!   | #NULL! | #NULL! | #NULL! |
| #NULL!   | #NULL!   | #NULL!   | #NULL!   | #NULL!   | 73.00  | -1.00  | 0.00   |
| 0.54262  | 0.57347  | 0.58713  | 0.36637  | 0.23041  | 62.00  | -9.00  | -16.00 |
| #NULL!   | #NULL!   | #NULL!   | #NULL!   | #NULL!   | 63.00  | 11.21  | 1.82   |
| #NULL!   | #NULL!   | #NULL!   | #NULL!   | #NULL!   | 76.00  | 2.63   | -6.00  |
| #NULL!   | #NULL!   | #NULL!   | #NULL!   | #NULL!   | 66.00  | -1.00  | -11.00 |
| #NULL!   | #NULL!   | #NULL!   | #NULL!   | #NULL!   | 70.00  | -2.00  | -6.00  |
| #NULL!   | #NULL!   | #NULL!   | #NULL!   | #NULL!   | 65.00  | -3.79  | -1.00  |
| #NULL!   | #NULL!   | #NULL!   | #NULL!   | #NULL!   | 74.00  | 3.00   | 2.26   |
| -0.63362 | 0.57347  | 0.15551  | 0.84029  | 0.42672  | #NULL! | #NULL! | #NULL! |
| #NULL!   | #NULL!   | #NULL!   | #NULL!   | #NULL!   | 77.00  | -0.62  | 10.11  |
| -0.41976 | -1.03833 | 0.50080  | 1.07725  | 0.72118  | 68.00  | -1.00  | -8.00  |
| 0.54262  | 1.00328  | 0.58713  | -0.81844 | -0.16219 | 56.00  | -1.00  | 4.00   |
| #NULL!   | #NULL!   | #NULL!   | #NULL!   | #NULL!   | 86.00  | 8.00   | 5.00   |
| #NULL!   | #NULL!   | #NULL!   | #NULL!   | #NULL!   | 80.00  | 3.00   | -1.05  |
| #NULL!   | #NULL!   | #NULL!   | #NULL!   | #NULL!   | 66.00  | -9.00  | 0.00   |
| #NULL!   | #NULL!   | #NULL!   | #NULL!   | #NULL!   | 54.00  | -2.00  | -3.00  |
| #NULL!   | #NULL!   | #NULL!   | #NULL!   | #NULL!   | 53.00  | -2.00  | -2.00  |
| 0.32876  | -0.28616 | 0.32815  | 0.01092  | -0.84926 | #NULL! | #NULL! | #NULL! |
| #NULL!   | #NULL!   | #NULL!   | #NULL!   | #NULL!   | 72.00  | -2.33  | -1.43  |
| #NULL!   | #NULL!   | #NULL!   | #NULL!   | #NULL!   | 76.00  | -2.11  | -3.00  |
| #NULL!   | #NULL!   | #NULL!   | #NULL!   | #NULL!   | 61.00  | -8.00  | -2.00  |
| #NULL!   | #NULL!   | #NULL!   | #NULL!   | #NULL!   | #NULL! | #NULL! | #NULL! |
| -0.31283 | -0.82343 | 0.75977  | 1.55117  | -1.83078 | 65.00  | 1.00   | -6.37  |





| RD_diff | PS_diff | SD_diff | CO_diff | ST_diff | NS_abs | HA_abs | RD_abs |
|---------|---------|---------|---------|---------|--------|--------|--------|
| -4.11   | 0.00    | -5.00   | 2.00    | -9.00   | 6.00   | 4.00   | 4.11   |
| 3.00    | 2.32    | 1.00    | -5.00   | 3.00    | 8.68   | 4.00   | 3.00   |
| -5.00   | 1.00    | 1.00    | -2.00   | 5.00    | 2.00   | 6.00   | 5.00   |
| #NULL!  | #NULL!  | #NULL!  | #NULL!  | #NULL!  | #NULL! | #NULL! | #NULL! |
| 4.26    | -10.00  | -24.00  | 12.00   | -1.00   | 3.00   | 7.00   | 4.26   |
| #NULL!  | #NULL!  | #NULL!  | #NULL!  | #NULL!  | #NULL! | #NULL! | #NULL! |
| -3.00   | -10.00  | -15.00  | -1.00   | -6.00   | 6.00   | 3.00   | 3.00   |
| 4.00    | 9.00    | -4.89   | 13.00   | 17.00   | 6.00   | 3.00   | 4.00   |
| -4.00   | 16.00   | 5.33    | 35.00   | 8.00    | 1.75   | 2.33   | 4.00   |
| #NULL!  | #NULL!  | #NULL!  | #NULL!  | #NULL!  | #NULL! | #NULL! | #NULL! |
| 5.26    | -1.00   | 0.00    | -3.00   | 3.57    | 1.00   | 3.00   | 5.26   |
| 0.00    | 3.05    | -7.00   | -2.00   | 2.00    | 2.00   | 3.00   | 0.00   |
| -4.00   | -5.00   | 1.00    | 0.00    | -2.00   | 5.00   | 6.00   | 4.00   |
| #NULL!  | #NULL!  | #NULL!  | #NULL!  | #NULL!  | #NULL! | #NULL! | #NULL! |
| -3.00   | -4.00   | 1.00    | 0.00    | -1.00   | 3.00   | 4.00   | 3.00   |
| 12.00   | 2.00    | 3.00    | 6.00    | -5.00   | 5.00   | 3.00   | 12.00  |
| -6.00   | 0.00    | 0.00    | 2.00    | 5.00    | 5.00   | 1.00   | 6.00   |
| -5.00   | 5.00    | 2.00    | 2.00    | 0.00    | 4.00   | 3.00   | 5.00   |
| -4.11   | -3.00   | 4.26    | 1.00    | 8.00    | 6.84   | 3.00   | 4.11   |
| 5.00    | 8.00    | 2.00    | 2.00    | 9.00    | 0.00   | 13.00  | 5.00   |
| 5.00    | -2.00   | 1.00    | 2.00    | 3.00    | 4.00   | 0.00   | 5.00   |
| -2.00   | 3.00    | 9.00    | -5.00   | -5.00   | 3.00   | 0.21   | 2.00   |
| 1.00    | -3.00   | 8.00    | -2.42   | -11.00  | 3.00   | 3.00   | 1.00   |
| 8.00    | -4.00   | -14.00  | -3.00   | 17.00   | 4.00   | 7.00   | 8.00   |
| 3.00    | -1.00   | -4.00   | -8.00   | -7.00   | 1.00   | 1.00   | 3.00   |
| 5.00    | -6.00   | 3.00    | -4.00   | 3.00    | 2.00   | 0.00   | 5.00   |
| 5.00    | 3.00    | 5.00    | 3.00    | -1.00   | 2.00   | 10.00  | 5.00   |
| -1.00   | 1.00    | -3.00   | 5.00    | 11.00   | 3.00   | 9.00   | 1.00   |
| #NULL!  | #NULL!  | #NULL!  | #NULL!  | #NULL!  | #NULL! | #NULL! | #NULL! |
| -7.00   | -2.00   | -7.00   | -1.00   | 5.00    | 1.00   | 5.00   | 7.00   |
| -1.37   | 1.00    | 0.00    | 1.00    | -8.00   | 7.00   | 1.00   | 1.37   |
| 3.00    | 2.00    | -3.00   | -11.00  | 5.00    | 3.00   | 4.00   | 3.00   |
| -6.00   | -1.00   | -11.00  | 3.00    | 4.00    | 1.00   | 10.00  | 6.00   |
| -7.00   | -5.00   | 2.00    | 16.00   | 7.00    | 6.00   | 2.00   | 7.00   |
| #NULL!  | #NULL!  | #NULL!  | #NULL!  | #NULL!  | #NULL! | #NULL! | #NULL! |
| #NULL!  | #NULL!  | #NULL!  | #NULL!  | #NULL!  | #NULL! | #NULL! | #NULL! |
| #NULL!  | #NULL!  | #NULL!  | #NULL!  | #NULL!  | #NULL! | #NULL! | #NULL! |
| #NULL!  | #NULL!  | #NULL!  | #NULL!  | #NULL!  | #NULL! | #NULL! | #NULL! |
| #NULL!  | #NULL!  | #NULL!  | #NULL!  | #NULL!  | #NULL! | #NULL! | #NULL! |
| 0.00    | -1.00   | -3.58   | -3.00   | -3.00   | 2.00   | 7.00   | 0.00   |
| 4.33    | -8.00   | -11.00  | -21.00  | 2.00    | 4.00   | 9.00   | 4.33   |
| -7.00   | 1.00    | -7.00   | 0.00    | -1.00   | 2.00   | 4.00   | 7.00   |
| -1.00   | 0.00    | -6.00   | 2.00    | 4.00    | 5.00   | 7.00   | 1.00   |
| -4.00   | -9.00   | 3.00    | 2.00    | 5.00    | 1.00   | 2.00   | 4.00   |
| #NULL!  | #NULL!  | #NULL!  | #NULL!  | #NULL!  | #NULL! | #NULL! | #NULL! |
| -3.42   | -11.00  | 11.00   | 11.00   | -8.00   | 5.00   | 4.00   | 3.42   |
| -3.00   | 1.00    | -7.00   | -3.00   | 5.00    | 3.00   | 1.00   | 3.00   |
| -2.74   | -4.00   | -15.00  | 1.00    | 8.00    | 7.00   | 12.00  | 2.74   |
| 4.00    | 4.00    | -3.00   | -6.00   | 1.00    | 3.00   | 4.00   | 4.00   |
| 6.47    | -1.00   | 0.00    | 14.00   | -2.00   | 9.00   | 2.00   | 6.47   |
| -3.00   | -7.00   | 11.00   | -3.00   | -6.00   | 1.00   | 6.00   | 3.00   |
| 4.00    | -7.00   | 10.00   | 5.00    | -3.00   | 5.00   | 0.11   | 4.00   |
| -7.00   | -2.00   | -3.00   | -1.00   | -3.00   | 7.00   | 3.00   | 7.00   |
| 2.00    | 5.00    | 0.00    | 5.00    | 7.00    | 0.00   | 3.00   | 2.00   |
| 5.00    | 0.00    | 0.00    | 6.00    | 13.00   | 4.00   | 1.00   | 5.00   |

|        |        |        |        |        |        |        |        |
|--------|--------|--------|--------|--------|--------|--------|--------|
| 10.00  | -2.00  | -1.00  | 3.00   | 6.00   | 1.00   | 0.00   | 10.00  |
| 2.26   | 2.00   | 20.00  | 12.00  | -16.00 | 5.00   | 7.00   | 2.26   |
| -2.00  | -16.00 | -3.00  | 3.89   | -3.00  | 4.00   | 5.00   | 2.00   |
| 2.00   | 8.00   | -3.00  | 2.00   | -3.00  | 0.00   | 4.00   | 2.00   |
| 4.00   | 0.00   | 0.00   | 0.00   | -8.00  | 5.00   | 1.00   | 4.00   |
| -1.00  | -3.00  | -0.32  | 5.00   | 4.00   | 1.00   | 1.00   | 1.00   |
| -11.00 | -9.00  | 10.00  | -11.00 | -4.00  | 5.00   | 7.00   | 11.00  |
| -3.00  | 6.00   | 4.00   | 7.00   | 0.00   | 1.00   | 10.00  | 3.00   |
| -10.00 | -1.00  | 7.00   | -3.00  | 7.00   | 0.00   | 10.00  | 10.00  |
| 4.00   | -3.00  | 0.00   | -4.21  | -1.00  | 3.00   | 1.00   | 4.00   |
| 2.00   | -4.00  | 4.00   | 7.00   | 1.00   | 0.00   | 1.00   | 2.00   |
| 1.63   | 1.16   | -6.00  | 4.74   | 12.00  | 3.00   | 11.00  | 1.63   |
| 0.00   | 0.00   | 2.00   | 3.00   | 0.00   | 2.00   | 11.00  | 0.00   |
| -1.00  | -2.00  | -5.37  | -2.00  | 0.00   | 6.00   | 5.00   | 1.00   |
| -12.00 | -2.00  | 1.00   | 10.00  | -2.00  | 2.00   | 3.00   | 12.00  |
| 16.00  | 10.00  | -2.00  | 10.00  | 2.00   | 4.00   | 2.00   | 16.00  |
| 6.00   | 6.00   | 4.00   | -1.00  | 11.00  | 3.00   | 7.00   | 6.00   |
| 5.00   | -1.00  | -2.00  | 4.00   | -1.00  | 0.00   | 6.00   | 5.00   |
| -1.00  | -8.00  | -2.00  | -3.00  | 1.00   | 9.00   | 2.00   | 1.00   |
| -6.79  | -1.89  | -5.00  | -2.79  | 8.00   | 7.00   | 4.47   | 6.79   |
| 7.00   | 5.00   | -6.00  | -7.00  | 2.00   | 4.00   | 13.00  | 7.00   |
| 1.00   | -2.00  | 5.00   | 7.00   | 13.00  | 3.00   | 9.00   | 1.00   |
| 11.00  | 8.00   | 6.00   | 2.00   | 3.00   | 4.00   | 10.00  | 11.00  |
| -7.00  | -22.44 | -6.00  | -11.00 | -1.00  | 5.00   | 11.00  | 7.00   |
| 4.00   | -1.00  | 4.00   | 1.00   | -6.00  | 3.00   | 2.00   | 4.00   |
| 3.00   | -2.00  | 0.00   | 9.00   | -9.00  | 3.00   | 3.00   | 3.00   |
| -2.00  | 0.00   | -3.00  | -2.00  | -5.00  | 1.00   | 0.00   | 2.00   |
| -1.00  | 2.00   | 0.00   | -2.00  | -4.00  | 1.00   | 2.00   | 1.00   |
| 0.00   | 0.00   | -3.00  | 3.00   | 2.00   | 2.00   | 1.00   | 0.00   |
| -5.00  | -6.00  | -10.00 | -6.00  | 3.00   | 2.00   | 9.00   | 5.00   |
| 8.00   | 5.00   | 0.00   | 8.00   | -4.00  | 5.00   | 4.00   | 8.00   |
| 3.00   | -11.00 | 9.00   | 1.00   | -25.00 | 1.00   | 5.00   | 3.00   |
| 7.00   | 9.00   | -1.00  | 5.00   | -12.00 | 2.00   | 5.00   | 7.00   |
| 0.00   | 4.00   | 1.00   | -3.00  | -4.87  | 2.00   | 7.00   | 0.00   |
| -3.00  | 5.00   | 4.00   | -6.00  | -4.00  | 8.00   | 3.00   | 3.00   |
| #NULL! | #NULL! | #NULL! | #NULL! | #NULL! | #NULL! | #NULL! | #NULL! |
| -9.00  | -2.00  | 3.00   | -3.00  | 4.00   | 6.00   | 1.00   | 9.00   |
| #NULL! | #NULL! | #NULL! | #NULL! | #NULL! | #NULL! | #NULL! | #NULL! |
| -13.00 | -16.00 | 2.00   | 5.00   | -6.00  | 4.00   | 3.00   | 13.00  |
| 7.00   | -3.00  | 1.00   | 4.00   | 5.00   | 2.00   | 3.00   | 7.00   |
| -6.00  | -1.00  | -5.00  | -5.00  | 3.00   | 2.00   | 7.00   | 6.00   |
| -1.26  | 5.25   | 2.79   | 3.63   | 3.43   | 0.16   | 0.33   | 1.26   |
| -6.00  | 9.00   | 7.00   | 4.00   | 1.00   | 2.00   | 0.00   | 6.00   |
| 8.00   | -4.00  | -4.00  | 7.00   | 0.00   | 0.00   | 6.00   | 8.00   |
| 1.89   | 10.00  | 4.00   | 4.00   | 3.00   | 2.00   | 3.00   | 1.89   |
| -3.00  | 10.00  | -4.00  | -6.00  | 1.00   | 1.00   | 6.00   | 3.00   |
| 1.00   | -1.00  | 9.00   | 0.00   | -6.00  | 2.00   | 1.00   | 1.00   |
| 3.00   | -11.00 | 9.00   | 5.00   | -2.00  | 0.00   | 4.00   | 3.00   |
| #NULL! | #NULL! | #NULL! | #NULL! | #NULL! | #NULL! | #NULL! | #NULL! |
| 0.00   | 4.00   | 14.00  | 1.00   | 0.00   | 2.00   | 12.00  | 0.00   |
| -8.00  | 1.00   | -1.00  | 4.00   | 9.00   | 3.00   | 2.00   | 8.00   |
| 4.00   | 0.00   | 2.00   | 5.00   | 8.40   | 3.00   | 5.00   | 4.00   |
| -5.00  | -5.05  | -1.00  | -9.00  | -3.00  | 2.00   | 7.00   | 5.00   |
| -4.00  | 1.00   | -5.00  | -10.00 | 8.00   | 3.00   | 1.00   | 4.00   |
| #NULL! | #NULL! | #NULL! | #NULL! | #NULL! | #NULL! | #NULL! | #NULL! |
| 1.00   | 1.00   | 5.00   | -2.00  | 2.73   | 1.00   | 4.00   | 1.00   |

|        |        |        |        |        |        |        |        |
|--------|--------|--------|--------|--------|--------|--------|--------|
| -2.22  | -1.00  | 22.16  | 1.00   | -1.00  | 9.00   | 3.00   | 2.22   |
| 1.00   | -5.00  | -1.00  | -5.00  | 12.00  | 3.00   | 2.00   | 1.00   |
| -2.00  | 1.00   | -1.37  | 5.00   | -17.00 | 7.00   | 7.00   | 2.00   |
| 3.00   | -4.00  | -6.00  | -1.00  | 9.00   | 0.00   | 6.00   | 3.00   |
| -2.00  | 7.00   | -3.00  | -11.00 | 7.00   | 4.00   | 0.00   | 2.00   |
| 5.16   | -3.00  | -3.00  | 2.00   | -5.53  | 2.00   | 3.00   | 5.16   |
| 1.00   | 10.00  | -12.21 | -8.00  | 20.00  | 2.26   | 3.63   | 1.00   |
| #NULL! | #NULL! | #NULL! | #NULL! | #NULL! | #NULL! | #NULL! | #NULL! |
| 0.00   | -12.00 | 6.00   | 15.00  | 3.00   | 8.00   | 5.68   | 0.00   |
| 19.00  | 1.00   | -13.00 | 5.00   | 1.00   | 4.00   | 1.00   | 19.00  |
| 6.00   | -1.00  | 9.00   | 6.00   | 10.00  | 0.00   | 3.00   | 6.00   |
| 3.00   | 3.00   | 4.00   | 8.00   | 9.00   | 1.00   | 7.00   | 3.00   |
| 3.00   | 7.00   | 1.00   | 3.00   | 5.00   | 6.00   | 3.00   | 3.00   |
| #NULL! | #NULL! | #NULL! | #NULL! | #NULL! | #NULL! | #NULL! | #NULL! |
| -4.00  | -3.00  | 11.00  | 7.00   | -13.00 | 2.00   | 1.00   | 4.00   |
| -4.00  | 1.00   | -7.00  | 1.00   | 4.00   | 2.00   | 1.00   | 4.00   |
| 0.00   | -10.00 | 6.00   | 6.00   | 6.00   | 7.00   | 3.00   | 0.00   |
| -11.00 | 6.00   | -5.00  | -4.00  | -1.00  | 1.00   | 4.00   | 11.00  |
| 1.00   | 8.16   | 16.00  | 3.00   | 3.00   | 1.00   | 10.00  | 1.00   |
| #NULL! | #NULL! | #NULL! | #NULL! | #NULL! | #NULL! | #NULL! | #NULL! |
| -3.00  | 10.00  | -5.00  | 7.78   | -1.00  | 5.00   | 7.00   | 3.00   |
| -2.00  | -9.00  | -13.00 | 12.00  | -5.00  | 7.00   | 7.00   | 2.00   |
| -9.00  | -13.00 | -21.00 | 4.00   | 2.00   | 8.00   | 5.00   | 9.00   |
| -10.00 | 11.00  | 7.00   | -15.00 | 0.00   | 6.00   | 5.00   | 10.00  |
| -4.00  | -7.00  | 4.00   | 7.00   | -1.00  | 11.00  | 6.00   | 4.00   |
| -9.00  | -2.00  | 1.00   | 2.00   | -1.00  | 2.00   | 2.00   | 9.00   |
| #NULL! | #NULL! | #NULL! | #NULL! | #NULL! | #NULL! | #NULL! | #NULL! |
| -1.00  | -7.00  | 15.00  | -11.00 | 14.00  | 3.00   | 9.00   | 1.00   |
| -7.00  | 6.00   | 0.16   | -6.00  | 3.00   | 0.00   | 3.00   | 7.00   |
| 3.00   | -4.00  | -6.00  | -5.00  | -15.00 | 4.00   | 0.00   | 3.00   |
| 9.68   | -11.00 | -5.00  | 7.68   | -3.00  | 3.00   | 3.68   | 9.68   |
| 0.00   | -8.00  | -6.00  | 5.00   | 5.00   | 5.00   | 7.00   | 0.00   |
| -1.00  | -4.00  | -8.00  | -1.00  | -2.00  | 3.00   | 2.84   | 1.00   |
| -2.00  | -2.00  | 3.00   | -8.00  | -10.00 | 3.00   | 2.00   | 2.00   |
| 6.00   | 3.00   | -7.00  | 2.00   | 7.00   | 1.00   | 6.00   | 6.00   |
| -1.00  | 14.00  | -5.00  | 6.00   | 5.00   | 2.00   | 1.58   | 1.00   |
| -3.00  | -3.00  | 4.00   | 5.00   | 3.00   | 3.00   | 2.00   | 3.00   |
| 1.00   | 3.00   | 7.00   | 3.00   | 9.00   | 1.00   | 1.00   | 1.00   |
| -4.42  | -7.00  | -2.42  | -3.00  | 2.80   | 2.00   | 6.00   | 4.42   |
| -0.27  | 0.00   | -2.14  | 1.00   | -7.20  | 7.67   | 7.38   | 0.27   |
| 8.00   | 6.00   | -5.00  | 16.00  | 7.00   | 3.00   | 11.00  | 8.00   |
| 2.00   | 12.00  | -11.00 | 4.00   | 10.00  | 7.00   | 6.68   | 2.00   |
| -1.00  | 8.00   | 0.00   | 6.00   | -2.00  | 1.00   | 1.21   | 1.00   |
| 8.00   | 8.00   | 2.00   | 6.00   | 7.00   | 2.00   | 11.00  | 8.00   |
| 4.00   | -3.00  | -1.00  | 7.00   | 3.00   | 6.00   | 3.00   | 4.00   |
| 0.00   | -2.00  | 4.00   | 5.00   | 5.00   | 1.00   | 2.00   | 0.00   |
| #NULL! | #NULL! | #NULL! | #NULL! | #NULL! | #NULL! | #NULL! | #NULL! |
| #NULL! | #NULL! | #NULL! | #NULL! | #NULL! | #NULL! | #NULL! | #NULL! |
| -2.00  | -2.00  | 2.00   | 3.00   | 1.00   | 1.00   | 0.00   | 2.00   |
| -6.00  | 6.00   | -4.00  | -1.00  | -1.00  | 7.00   | 5.11   | 6.00   |
| 8.00   | -2.00  | 2.00   | 1.95   | -17.00 | 11.32  | 3.00   | 8.00   |
| 0.00   | -3.00  | 5.00   | 2.00   | 4.00   | 6.00   | 1.05   | 0.00   |
| 1.00   | 4.00   | 0.00   | -6.00  | 4.00   | 1.00   | 8.00   | 1.00   |
| 0.00   | 0.00   | -1.00  | -4.00  | -1.00  | 3.00   | 1.00   | 0.00   |
| 6.00   | -7.00  | 3.00   | 3.00   | 4.00   | 2.00   | 0.00   | 6.00   |
| 2.00   | -9.00  | 1.00   | -4.00  | 0.00   | 4.00   | 5.00   | 2.00   |

|        |        |        |        |        |        |        |        |
|--------|--------|--------|--------|--------|--------|--------|--------|
| #NULL! | #NULL! | #NULL! | #NULL! | #NULL! | #NULL! | #NULL! | #NULL! |
| 1.00   | 0.00   | 0.00   | 0.00   | -5.00  | 4.00   | 9.00   | 1.00   |
| 5.00   | 12.00  | 5.37   | 2.00   | 14.00  | 6.00   | 7.00   | 5.00   |
| 4.00   | -3.00  | 3.00   | 0.00   | -2.00  | 1.00   | 8.68   | 4.00   |
| 4.00   | -2.00  | -5.00  | 1.00   | 2.00   | 0.00   | 6.21   | 4.00   |
| -4.00  | -2.00  | 15.00  | -7.00  | -4.00  | 5.11   | 9.00   | 4.00   |
| 0.00   | 1.00   | 1.00   | -4.00  | -14.00 | 2.00   | 1.00   | 0.00   |
| 9.00   | 14.68  | 23.00  | 6.00   | 10.00  | 0.00   | 9.00   | 9.00   |
| -1.00  | -3.00  | -6.00  | -1.00  | 2.00   | 10.00  | 14.00  | 1.00   |
| 0.00   | -2.00  | -11.00 | 0.00   | -3.00  | 4.00   | 2.00   | 0.00   |
| -7.00  | 3.00   | -2.00  | 7.00   | -3.00  | 3.00   | 2.00   | 7.00   |
| 5.00   | -9.00  | 0.00   | 7.00   | -14.00 | 3.00   | 6.00   | 5.00   |
| 6.00   | -19.00 | 18.00  | 9.00   | 1.00   | 6.00   | 11.00  | 6.00   |
| 2.00   | 7.00   | 5.32   | 5.00   | 21.00  | 2.00   | 4.00   | 2.00   |
| -0.33  | 7.00   | 4.00   | 8.37   | 4.93   | 9.00   | 16.44  | 0.33   |
| -4.00  | -5.00  | 17.00  | 15.00  | -8.00  | 17.00  | 7.00   | 4.00   |
| 6.16   | 0.00   | 7.00   | 8.00   | 0.00   | 4.00   | 5.00   | 6.16   |
| 5.00   | -6.00  | -2.00  | 0.00   | 6.00   | 1.00   | 0.00   | 5.00   |
| -2.00  | -4.00  | 1.00   | 4.00   | -17.00 | 4.00   | 1.00   | 2.00   |
| 6.00   | -1.00  | 6.00   | 2.00   | -2.00  | 2.00   | 1.00   | 6.00   |
| 5.00   | 1.00   | -16.00 | 1.00   | 4.00   | 0.00   | 5.00   | 5.00   |
| -5.00  | 0.00   | 5.00   | -1.00  | -9.00  | 6.00   | 3.00   | 5.00   |
| 8.00   | 8.00   | -9.00  | -1.00  | 9.00   | 2.00   | 2.00   | 8.00   |
| 6.00   | 3.00   | 0.00   | -6.00  | 13.00  | 3.00   | 13.00  | 6.00   |
| -3.00  | -7.00  | -2.00  | 7.00   | 0.00   | 7.68   | 0.00   | 3.00   |
| 13.00  | 9.00   | 2.00   | 14.00  | -1.60  | 3.00   | 6.00   | 13.00  |
| -2.00  | -13.00 | -14.00 | -5.00  | -3.00  | 1.00   | 2.00   | 2.00   |
| -5.00  | -7.00  | -13.00 | 2.00   | -10.00 | 5.00   | 3.00   | 5.00   |
| 6.00   | 2.00   | 5.00   | 6.00   | 1.00   | 4.00   | 12.00  | 6.00   |
| -1.00  | -5.00  | 1.00   | -1.00  | -2.00  | 1.00   | 2.00   | 1.00   |
| -5.00  | 0.00   | 4.00   | 0.00   | 7.00   | 1.00   | 2.00   | 5.00   |
| 3.84   | 0.00   | 2.00   | -12.00 | 4.33   | 6.00   | 3.00   | 3.84   |
| -2.00  | -6.00  | -2.00  | -10.00 | 5.00   | 2.00   | 2.00   | 2.00   |
| -3.00  | 1.00   | -14.00 | -1.63  | 12.00  | 7.00   | 8.00   | 3.00   |
| -1.00  | 1.68   | 1.00   | -5.00  | -1.00  | 5.00   | 0.00   | 1.00   |
| -4.00  | -4.00  | 10.00  | 3.00   | 2.00   | 4.00   | 5.00   | 4.00   |
| -5.00  | 4.00   | 4.00   | 4.00   | -4.00  | 4.00   | 1.00   | 5.00   |
| 1.00   | 13.00  | 27.00  | -1.00  | 2.00   | 3.00   | 14.00  | 1.00   |
| #NULL! | #NULL! | #NULL! | #NULL! | #NULL! | #NULL! | #NULL! | #NULL! |
| -5.00  | 3.00   | -11.00 | 0.00   | 9.00   | 1.00   | 11.00  | 5.00   |
| 8.00   | -3.00  | 3.00   | 2.00   | 6.00   | 3.00   | 5.00   | 8.00   |
| 0.00   | 6.00   | -1.00  | -6.00  | 1.00   | 7.00   | 9.00   | 0.00   |
| 5.00   | -3.00  | 13.00  | 11.89  | 3.00   | 0.00   | 2.00   | 5.00   |
| #NULL! | #NULL! | #NULL! | #NULL! | #NULL! | #NULL! | #NULL! | #NULL! |
| -2.00  | -1.00  | 12.42  | 4.00   | -1.00  | 5.00   | 1.00   | 2.00   |
| 1.00   | 4.00   | 5.00   | -8.00  | 8.00   | 1.00   | 4.00   | 1.00   |
| -5.00  | 0.74   | -3.00  | 0.32   | 3.00   | 3.00   | 2.00   | 5.00   |
| 0.00   | 6.00   | 10.00  | 7.00   | -3.00  | 3.00   | 1.00   | 0.00   |
| -2.00  | 1.00   | -1.00  | -3.00  | 6.00   | 3.00   | 5.00   | 2.00   |
| 7.00   | 1.00   | 9.00   | 1.00   | 2.00   | 2.00   | 10.00  | 7.00   |
| #NULL! | #NULL! | #NULL! | #NULL! | #NULL! | #NULL! | #NULL! | #NULL! |
| 2.47   | -5.37  | 13.00  | 3.00   | -5.00  | 8.00   | 2.00   | 2.47   |
| -3.00  | -1.00  | 6.00   | -5.00  | -5.00  | 4.00   | 5.00   | 3.00   |
| 5.05   | 0.00   | 21.00  | 9.79   | 5.31   | 9.30   | 9.79   | 5.05   |
| -4.00  | 1.74   | -1.00  | -4.00  | 0.00   | 3.00   | 2.00   | 4.00   |
| -12.00 | -3.00  | 2.00   | -4.00  | 5.00   | 4.05   | 3.00   | 12.00  |

|        |        |        |        |        |        |        |        |
|--------|--------|--------|--------|--------|--------|--------|--------|
| -4.00  | 8.00   | 15.00  | 5.00   | -1.00  | 2.00   | 9.00   | 4.00   |
| -1.00  | -9.00  | -16.00 | -10.00 | -3.00  | 12.00  | 7.00   | 1.00   |
| -8.00  | 4.00   | -5.00  | 1.00   | -7.00  | 6.00   | 2.00   | 8.00   |
| 6.00   | -1.00  | -1.00  | -2.00  | 2.00   | 0.00   | 2.00   | 6.00   |
| -1.00  | 10.00  | 8.00   | 0.00   | -1.00  | 2.00   | 5.00   | 1.00   |
| 9.00   | 12.00  | 4.00   | 8.00   | 6.00   | 0.37   | 5.00   | 9.00   |
| -10.00 | -14.00 | -1.00  | 1.00   | 0.00   | 2.00   | 4.00   | 10.00  |
| 3.00   | -9.00  | -5.00  | -7.00  | 0.00   | 2.00   | 4.00   | 3.00   |
| 0.00   | 3.00   | 4.00   | 2.00   | -3.00  | 2.00   | 9.00   | 0.00   |
| -4.00  | 7.42   | -4.00  | 4.00   | 13.00  | 3.00   | 2.00   | 4.00   |
| 3.00   | -6.00  | 11.00  | 2.00   | -6.00  | 1.00   | 5.00   | 3.00   |
| 0.00   | -9.00  | -5.00  | -8.00  | -7.00  | 0.00   | 4.00   | 0.00   |
| -6.00  | 4.00   | 2.00   | -5.00  | 8.00   | 1.00   | 4.47   | 6.00   |
| 0.00   | -5.21  | -12.00 | 7.00   | -1.00  | 0.00   | 13.00  | 0.00   |
| 0.00   | 6.00   | 0.00   | -2.00  | 1.00   | 2.00   | 0.00   | 0.00   |
| -6.00  | -1.00  | -4.00  | 0.53   | 8.00   | 15.00  | 9.05   | 6.00   |
| -0.68  | 7.00   | 19.42  | 11.00  | 16.00  | 9.00   | 3.74   | 0.68   |
| 5.00   | -3.00  | 6.00   | -6.00  | -10.00 | 0.00   | 3.00   | 5.00   |
| -0.78  | 3.00   | 13.00  | -2.00  | -8.00  | 1.00   | 10.00  | 0.78   |
| 5.00   | 0.00   | 9.00   | 4.00   | 6.00   | 5.00   | 1.00   | 5.00   |
| 18.00  | -5.00  | -9.00  | -1.00  | 21.00  | 6.00   | 7.00   | 18.00  |
| 0.00   | 7.00   | -4.00  | -1.00  | 1.00   | 3.00   | 6.00   | 0.00   |
| #NULL! | #NULL! | #NULL! | #NULL! | #NULL! | #NULL! | #NULL! | #NULL! |
| -4.53  | -4.42  | 7.00   | 12.71  | -0.33  | 4.00   | 12.68  | 4.53   |
| -4.00  | 4.00   | -12.00 | 0.00   | 6.00   | 4.00   | 3.00   | 4.00   |
| -3.00  | -5.00  | 16.00  | 4.00   | 4.00   | 3.00   | 7.00   | 3.00   |
| -3.00  | -2.00  | 5.00   | 4.00   | -1.00  | 0.00   | 3.00   | 3.00   |
| 0.00   | 0.00   | 7.00   | -1.00  | -16.00 | 7.00   | 1.00   | 0.00   |
| -5.00  | -1.00  | 5.00   | 1.00   | -3.00  | 3.00   | 6.00   | 5.00   |
| #NULL! | #NULL! | #NULL! | #NULL! | #NULL! | #NULL! | #NULL! | #NULL! |
| 5.00   | -3.00  | 2.00   | -6.00  | -5.00  | 7.00   | 12.00  | 5.00   |
| -11.00 | -26.00 | -3.00  | -9.68  | -9.00  | 2.00   | 4.00   | 11.00  |
| #NULL! | #NULL! | #NULL! | #NULL! | #NULL! | #NULL! | #NULL! | #NULL! |
| 5.00   | 0.00   | 4.00   | 0.00   | -2.00  | 1.00   | 0.00   | 5.00   |
| 7.00   | 15.00  | -10.00 | 2.00   | 19.00  | 9.00   | 16.00  | 7.00   |
| 2.63   | -2.37  | 5.26   | 8.00   | 5.13   | 11.21  | 1.82   | 2.63   |
| 3.00   | 1.00   | -6.00  | 3.00   | -6.00  | 2.63   | 6.00   | 3.00   |
| 8.79   | 5.00   | 3.00   | 4.32   | 3.00   | 1.00   | 11.00  | 8.79   |
| -3.00  | 7.00   | 3.00   | -3.00  | 4.00   | 2.00   | 6.00   | 3.00   |
| -3.00  | 7.00   | 0.00   | -2.00  | 6.00   | 3.79   | 1.00   | 3.00   |
| 5.00   | -2.00  | -7.00  | 1.00   | 4.80   | 3.00   | 2.26   | 5.00   |
| #NULL! | #NULL! | #NULL! | #NULL! | #NULL! | #NULL! | #NULL! | #NULL! |
| -13.56 | -9.00  | 5.00   | 6.26   | -5.07  | 0.62   | 10.11  | 13.56  |
| -1.00  | 6.00   | 4.00   | 3.00   | 5.00   | 1.00   | 8.00   | 1.00   |
| 4.00   | -12.00 | 0.00   | 13.00  | -5.00  | 1.00   | 4.00   | 4.00   |
| -11.00 | -10.00 | 6.00   | -4.00  | 3.00   | 8.00   | 5.00   | 11.00  |
| -7.00  | -2.00  | 3.00   | -4.00  | 3.00   | 3.00   | 1.05   | 7.00   |
| -3.00  | -1.00  | -4.00  | 0.00   | 2.00   | 9.00   | 0.00   | 3.00   |
| 5.00   | 9.00   | -7.00  | 1.00   | 0.00   | 2.00   | 3.00   | 5.00   |
| 1.00   | 7.00   | 12.00  | 9.00   | 5.00   | 2.00   | 2.00   | 1.00   |
| #NULL! | #NULL! | #NULL! | #NULL! | #NULL! | #NULL! | #NULL! | #NULL! |
| 0.33   | 14.00  | -1.25  | 15.00  | 8.00   | 2.33   | 1.43   | 0.33   |
| 4.00   | -5.00  | 2.00   | 3.00   | -10.80 | 2.11   | 3.00   | 4.00   |
| 3.00   | 10.00  | -1.00  | -2.00  | 10.00  | 8.00   | 2.00   | 3.00   |
| #NULL! | #NULL! | #NULL! | #NULL! | #NULL! | #NULL! | #NULL! | #NULL! |
| 0.00   | 0.00   | 4.00   | 0.00   | 11.00  | 1.00   | 6.37   | 0.00   |



| PS_abs | SD_abs | CO_abs | ST_abs | tas4_P3_a | tas5_P3_a | tas10_P3_a | tas18_P3_a |
|--------|--------|--------|--------|-----------|-----------|------------|------------|
| 0.00   | 5.00   | 2.00   | 9.00   | 2.00      | 3.00      | 2.00       | 1.00       |
| 2.32   | 1.00   | 5.00   | 3.00   | 1.00      | 0.00      | 0.00       | 0.00       |
| 1.00   | 1.00   | 2.00   | 5.00   | 1.00      | 3.00      | 1.00       | 1.00       |
| #NULL! | #NULL! | #NULL! | #NULL! | #NULL!    | #NULL!    | #NULL!     | #NULL!     |
| 10.00  | 24.00  | 12.00  | 1.00   | #NULL!    | #NULL!    | #NULL!     | #NULL!     |
| #NULL! | #NULL! | #NULL! | #NULL! | #NULL!    | #NULL!    | #NULL!     | #NULL!     |
| 10.00  | 15.00  | 1.00   | 6.00   | 3.00      | 2.00      | 2.00       | 1.00       |
| 9.00   | 4.89   | 13.00  | 17.00  | 1.00      | 1.00      | 1.00       | 1.00       |
| 16.00  | 5.33   | 35.00  | 8.00   | 1.00      | 1.00      | 0.00       | 4.00       |
| #NULL! | #NULL! | #NULL! | #NULL! | #NULL!    | #NULL!    | #NULL!     | #NULL!     |
| 1.00   | 0.00   | 3.00   | 3.57   | 1.00      | 1.00      | 0.00       | 0.00       |
| 3.05   | 7.00   | 2.00   | 2.00   | 1.00      | 2.00      | 1.00       | 1.00       |
| 5.00   | 1.00   | 0.00   | 2.00   | 1.00      | 1.00      | 1.00       | 0.00       |
| #NULL! | #NULL! | #NULL! | #NULL! | #NULL!    | #NULL!    | #NULL!     | #NULL!     |
| 4.00   | 1.00   | 0.00   | 1.00   | 1.00      | 1.00      | 1.00       | 1.00       |
| 2.00   | 3.00   | 6.00   | 5.00   | #NULL!    | #NULL!    | #NULL!     | #NULL!     |
| 0.00   | 0.00   | 2.00   | 5.00   | 1.00      | 1.00      | 1.00       | 1.00       |
| 5.00   | 2.00   | 2.00   | 0.00   | 4.00      | 4.00      | 2.00       | 4.00       |
| 3.00   | 4.26   | 1.00   | 8.00   | 0.00      | 0.00      | #NULL!     | 2.00       |
| 8.00   | 2.00   | 2.00   | 9.00   | 4.00      | 4.00      | 1.00       | 1.00       |
| 2.00   | 1.00   | 2.00   | 3.00   | 1.00      | 0.00      | 1.00       | 1.00       |
| 3.00   | 9.00   | 5.00   | 5.00   | 0.00      | 0.00      | 0.00       | 0.00       |
| 3.00   | 8.00   | 2.42   | 11.00  | 3.00      | 1.00      | 2.00       | 2.00       |
| 4.00   | 14.00  | 3.00   | 17.00  | 2.00      | 2.00      | 2.00       | 2.00       |
| 1.00   | 4.00   | 8.00   | 7.00   | 1.00      | 3.00      | 0.00       | 3.00       |
| 6.00   | 3.00   | 4.00   | 3.00   | 0.00      | 1.00      | 0.00       | 1.00       |
| 3.00   | 5.00   | 3.00   | 1.00   | 0.00      | 0.00      | 1.00       | 0.00       |
| 1.00   | 3.00   | 5.00   | 11.00  | 0.00      | 1.00      | 0.00       | 1.00       |
| #NULL! | #NULL! | #NULL! | #NULL! | #NULL!    | #NULL!    | #NULL!     | #NULL!     |
| 2.00   | 7.00   | 1.00   | 5.00   | 1.00      | 0.00      | 4.00       | 4.00       |
| 1.00   | 0.00   | 1.00   | 8.00   | 2.00      | 4.00      | 1.00       | 2.00       |
| 2.00   | 3.00   | 11.00  | 5.00   | 1.00      | 2.00      | 1.00       | 3.00       |
| 1.00   | 11.00  | 3.00   | 4.00   | 1.00      | 1.00      | 1.00       | 1.00       |
| 5.00   | 2.00   | 16.00  | 7.00   | 1.00      | 2.00      | 3.00       | 1.00       |
| #NULL! | #NULL! | #NULL! | #NULL! | #NULL!    | #NULL!    | #NULL!     | #NULL!     |
| #NULL! | #NULL! | #NULL! | #NULL! | #NULL!    | #NULL!    | #NULL!     | #NULL!     |
| #NULL! | #NULL! | #NULL! | #NULL! | #NULL!    | #NULL!    | #NULL!     | #NULL!     |
| #NULL! | #NULL! | #NULL! | #NULL! | #NULL!    | #NULL!    | #NULL!     | #NULL!     |
| #NULL! | #NULL! | #NULL! | #NULL! | #NULL!    | #NULL!    | #NULL!     | #NULL!     |
| 1.00   | 3.58   | 3.00   | 3.00   | 2.00      | 1.00      | 0.00       | 1.00       |
| 8.00   | 11.00  | 21.00  | 2.00   | 2.00      | 2.00      | 0.00       | 0.00       |
| 1.00   | 7.00   | 0.00   | 1.00   | 1.00      | 0.00      | 1.00       | 1.00       |
| 0.00   | 6.00   | 2.00   | 4.00   | 0.00      | 1.00      | 0.00       | 1.00       |
| 9.00   | 3.00   | 2.00   | 5.00   | #NULL!    | #NULL!    | #NULL!     | #NULL!     |
| #NULL! | #NULL! | #NULL! | #NULL! | #NULL!    | #NULL!    | #NULL!     | #NULL!     |
| 11.00  | 11.00  | 11.00  | 8.00   | 0.00      | 4.00      | 1.00       | 4.00       |
| 1.00   | 7.00   | 3.00   | 5.00   | 1.00      | 1.00      | 0.00       | 0.00       |
| 4.00   | 15.00  | 1.00   | 8.00   | #NULL!    | #NULL!    | #NULL!     | #NULL!     |
| 4.00   | 3.00   | 6.00   | 1.00   | 1.00      | 0.00      | 0.00       | 0.00       |
| 1.00   | 0.00   | 14.00  | 2.00   | 0.00      | 1.00      | 0.00       | 0.00       |
| 7.00   | 11.00  | 3.00   | 6.00   | 2.00      | 1.00      | 1.00       | 1.00       |
| 7.00   | 10.00  | 5.00   | 3.00   | #NULL!    | #NULL!    | #NULL!     | #NULL!     |
| 2.00   | 3.00   | 1.00   | 3.00   | 0.00      | 1.00      | 0.00       | 0.00       |
| 5.00   | 0.00   | 5.00   | 7.00   | 0.00      | 1.00      | 0.00       | 1.00       |
| 0.00   | 0.00   | 6.00   | 13.00  | #NULL!    | #NULL!    | #NULL!     | #NULL!     |

|        |        |        |        |        |        |        |        |
|--------|--------|--------|--------|--------|--------|--------|--------|
| 2.00   | 1.00   | 3.00   | 6.00   | 2.00   | 1.00   | 2.00   | 1.00   |
| 2.00   | 20.00  | 12.00  | 16.00  | 4.00   | 4.00   | 0.00   | 1.00   |
| 16.00  | 3.00   | 3.89   | 3.00   | 4.00   | 2.00   | 1.00   | 1.00   |
| 8.00   | 3.00   | 2.00   | 3.00   | 4.00   | 4.00   | 0.00   | 0.00   |
| 0.00   | 0.00   | 0.00   | 8.00   | 1.00   | 1.00   | 0.00   | 4.00   |
| 3.00   | 0.32   | 5.00   | 4.00   | #NULL! | #NULL! | #NULL! | #NULL! |
| 9.00   | 10.00  | 11.00  | 4.00   | 0.00   | 0.00   | 1.00   | 2.00   |
| 6.00   | 4.00   | 7.00   | 0.00   | 0.00   | 1.00   | 1.00   | 0.00   |
| 1.00   | 7.00   | 3.00   | 7.00   | 1.00   | 1.00   | 1.00   | 1.00   |
| 3.00   | 0.00   | 4.21   | 1.00   | 3.00   | 3.00   | 2.00   | 1.00   |
| 4.00   | 4.00   | 7.00   | 1.00   | 0.00   | 2.00   | 1.00   | 2.00   |
| 1.16   | 6.00   | 4.74   | 12.00  | 1.00   | 4.00   | 1.00   | 4.00   |
| 0.00   | 2.00   | 3.00   | 0.00   | 3.00   | 0.00   | 0.00   | 0.00   |
| 2.00   | 5.37   | 2.00   | 0.00   | 2.00   | 2.00   | 2.00   | 2.00   |
| 2.00   | 1.00   | 10.00  | 2.00   | 2.00   | 2.00   | 2.00   | 2.00   |
| 10.00  | 2.00   | 10.00  | 2.00   | 1.00   | 1.00   | 0.00   | 0.00   |
| 6.00   | 4.00   | 1.00   | 11.00  | 1.00   | 2.00   | 1.00   | 1.00   |
| 1.00   | 2.00   | 4.00   | 1.00   | 1.00   | 1.00   | 1.00   | 1.00   |
| 8.00   | 2.00   | 3.00   | 1.00   | 1.00   | 2.00   | 2.00   | 2.00   |
| 1.89   | 5.00   | 2.79   | 8.00   | 2.00   | 3.00   | 1.00   | 1.00   |
| 5.00   | 6.00   | 7.00   | 2.00   | 0.00   | 4.00   | 0.00   | 0.00   |
| 2.00   | 5.00   | 7.00   | 13.00  | 3.00   | 1.00   | 1.00   | 1.00   |
| 8.00   | 6.00   | 2.00   | 3.00   | #NULL! | #NULL! | #NULL! | #NULL! |
| 22.44  | 6.00   | 11.00  | 1.00   | #NULL! | #NULL! | #NULL! | #NULL! |
| 1.00   | 4.00   | 1.00   | 6.00   | 4.00   | 4.00   | 0.00   | 0.00   |
| 2.00   | 0.00   | 9.00   | 9.00   | 0.00   | 2.00   | 2.00   | 1.00   |
| 0.00   | 3.00   | 2.00   | 5.00   | 1.00   | 1.00   | 2.00   | 1.00   |
| 2.00   | 0.00   | 2.00   | 4.00   | 4.00   | 2.00   | 0.00   | 1.00   |
| 0.00   | 3.00   | 3.00   | 2.00   | 3.00   | 3.00   | 2.00   | 1.00   |
| 6.00   | 10.00  | 6.00   | 3.00   | 1.00   | 2.00   | 1.00   | 1.00   |
| 5.00   | 0.00   | 8.00   | 4.00   | 0.00   | 1.00   | 0.00   | 1.00   |
| 11.00  | 9.00   | 1.00   | 25.00  | 1.00   | 0.00   | 0.00   | 0.00   |
| 9.00   | 1.00   | 5.00   | 12.00  | 4.00   | 1.00   | 1.00   | 0.00   |
| 4.00   | 1.00   | 3.00   | 4.87   | 1.00   | 3.00   | 1.00   | 1.00   |
| 5.00   | 4.00   | 6.00   | 4.00   | 0.00   | 2.00   | 0.00   | 1.00   |
| #NULL! | #NULL! | #NULL! | #NULL! | #NULL! | #NULL! | #NULL! | #NULL! |
| 2.00   | 3.00   | 3.00   | 4.00   | 1.00   | 1.00   | 3.00   | 1.00   |
| #NULL! | #NULL! | #NULL! | #NULL! | #NULL! | #NULL! | #NULL! | #NULL! |
| 16.00  | 2.00   | 5.00   | 6.00   | #NULL! | #NULL! | #NULL! | #NULL! |
| 3.00   | 1.00   | 4.00   | 5.00   | 2.00   | 1.00   | 1.00   | 1.00   |
| 1.00   | 5.00   | 5.00   | 3.00   | 1.00   | 2.00   | 0.00   | 4.00   |
| 5.25   | 2.79   | 3.63   | 3.43   | 2.00   | 3.00   | 2.00   | 1.00   |
| 9.00   | 7.00   | 4.00   | 1.00   | 1.00   | 1.00   | 1.00   | 1.00   |
| 4.00   | 4.00   | 7.00   | 0.00   | 3.00   | 0.00   | 0.00   | 0.00   |
| 10.00  | 4.00   | 4.00   | 3.00   | 2.00   | 1.00   | 1.00   | 2.00   |
| 10.00  | 4.00   | 6.00   | 1.00   | 0.00   | 1.00   | 4.00   | 0.00   |
| 1.00   | 9.00   | 0.00   | 6.00   | 1.00   | 1.00   | 2.00   | 3.00   |
| 11.00  | 9.00   | 5.00   | 2.00   | 2.00   | 3.00   | 1.00   | 0.00   |
| #NULL! | #NULL! | #NULL! | #NULL! | #NULL! | #NULL! | #NULL! | #NULL! |
| 4.00   | 14.00  | 1.00   | 0.00   | 1.00   | 3.00   | 2.00   | 1.00   |
| 1.00   | 1.00   | 4.00   | 9.00   | #NULL! | #NULL! | #NULL! | #NULL! |
| 0.00   | 2.00   | 5.00   | 8.40   | 1.00   | 1.00   | 1.00   | 2.00   |
| 5.05   | 1.00   | 9.00   | 3.00   | 1.00   | 2.00   | 4.00   | 2.00   |
| 1.00   | 5.00   | 10.00  | 8.00   | 1.00   | 3.00   | 0.00   | 0.00   |
| #NULL! | #NULL! | #NULL! | #NULL! | #NULL! | #NULL! | #NULL! | #NULL! |
| 1.00   | 5.00   | 2.00   | 2.73   | 1.00   | 2.00   | 2.00   | 0.00   |



|        |        |        |        |        |        |        |        |
|--------|--------|--------|--------|--------|--------|--------|--------|
| 1.00   | 22.16  | 1.00   | 1.00   | 3.00   | 2.00   | 1.00   | 1.00   |
| 5.00   | 1.00   | 5.00   | 12.00  | 1.00   | 1.00   | 1.00   | 1.00   |
| 1.00   | 1.37   | 5.00   | 17.00  | 0.00   | 1.00   | 2.00   | 0.00   |
| 4.00   | 6.00   | 1.00   | 9.00   | #NULL! | #NULL! | #NULL! | #NULL! |
| 7.00   | 3.00   | 11.00  | 7.00   | 1.00   | 2.00   | 1.00   | 1.00   |
| 3.00   | 3.00   | 2.00   | 5.53   | 0.00   | 0.00   | 1.00   | 0.00   |
| 10.00  | 12.21  | 8.00   | 20.00  | 3.00   | 1.00   | 1.00   | 3.00   |
| #NULL! | #NULL! | #NULL! | #NULL! | #NULL! | #NULL! | #NULL! | #NULL! |
| 12.00  | 6.00   | 15.00  | 3.00   | #NULL! | #NULL! | #NULL! | #NULL! |
| 1.00   | 13.00  | 5.00   | 1.00   | 3.00   | 0.00   | 0.00   | 0.00   |
| 1.00   | 9.00   | 6.00   | 10.00  | 1.00   | 1.00   | 0.00   | 1.00   |
| 3.00   | 4.00   | 8.00   | 9.00   | 1.00   | 1.00   | 0.00   | 1.00   |
| 7.00   | 1.00   | 3.00   | 5.00   | 1.00   | 3.00   | 3.00   | 0.00   |
| #NULL! | #NULL! | #NULL! | #NULL! | #NULL! | #NULL! | #NULL! | #NULL! |
| 3.00   | 11.00  | 7.00   | 13.00  | 0.00   | 1.00   | 1.00   | 1.00   |
| 1.00   | 7.00   | 1.00   | 4.00   | #NULL! | #NULL! | #NULL! | #NULL! |
| 10.00  | 6.00   | 6.00   | 6.00   | 1.00   | 2.00   | 1.00   | 0.00   |
| 6.00   | 5.00   | 4.00   | 1.00   | #NULL! | #NULL! | #NULL! | #NULL! |
| 8.16   | 16.00  | 3.00   | 3.00   | 0.00   | 0.00   | 1.00   | 0.00   |
| #NULL! | #NULL! | #NULL! | #NULL! | #NULL! | #NULL! | #NULL! | #NULL! |
| 10.00  | 5.00   | 7.78   | 1.00   | #NULL! | #NULL! | #NULL! | #NULL! |
| 9.00   | 13.00  | 12.00  | 5.00   | 2.00   | 2.00   | 1.00   | 0.00   |
| 13.00  | 21.00  | 4.00   | 2.00   | #NULL! | #NULL! | #NULL! | #NULL! |
| 11.00  | 7.00   | 15.00  | 0.00   | 1.00   | 3.00   | 4.00   | 3.00   |
| 7.00   | 4.00   | 7.00   | 1.00   | 2.00   | 1.00   | 1.00   | 1.00   |
| 2.00   | 1.00   | 2.00   | 1.00   | 2.00   | 1.00   | 2.00   | 1.00   |
| #NULL! | #NULL! | #NULL! | #NULL! | #NULL! | #NULL! | #NULL! | #NULL! |
| 7.00   | 15.00  | 11.00  | 14.00  | 1.00   | 1.00   | 1.00   | 1.00   |
| 6.00   | 0.16   | 6.00   | 3.00   | #NULL! | #NULL! | #NULL! | #NULL! |
| 4.00   | 6.00   | 5.00   | 15.00  | #NULL! | #NULL! | #NULL! | #NULL! |
| 11.00  | 5.00   | 7.68   | 3.00   | #NULL! | #NULL! | #NULL! | #NULL! |
| 8.00   | 6.00   | 5.00   | 5.00   | 1.00   | 1.00   | 1.00   | 0.00   |
| 4.00   | 8.00   | 1.00   | 2.00   | 2.00   | 2.00   | 0.00   | 0.00   |
| 2.00   | 3.00   | 8.00   | 10.00  | 3.00   | 2.00   | 2.00   | 1.00   |
| 3.00   | 7.00   | 2.00   | 7.00   | 2.00   | 1.00   | 1.00   | 2.00   |
| 14.00  | 5.00   | 6.00   | 5.00   | 0.00   | 1.00   | 0.00   | 0.00   |
| 3.00   | 4.00   | 5.00   | 3.00   | #NULL! | #NULL! | #NULL! | #NULL! |
| 3.00   | 7.00   | 3.00   | 9.00   | 2.00   | 1.00   | 1.00   | 1.00   |
| 7.00   | 2.42   | 3.00   | 2.80   | 3.00   | 0.00   | 3.00   | 2.00   |
| 0.00   | 2.14   | 1.00   | 7.20   | #NULL! | #NULL! | #NULL! | #NULL! |
| 6.00   | 5.00   | 16.00  | 7.00   | 2.00   | 0.00   | 0.00   | 0.00   |
| 12.00  | 11.00  | 4.00   | 10.00  | 0.00   | 1.00   | 0.00   | 1.00   |
| 8.00   | 0.00   | 6.00   | 2.00   | 1.00   | 1.00   | 0.00   | 2.00   |
| 8.00   | 2.00   | 6.00   | 7.00   | 1.00   | 1.00   | 1.00   | 1.00   |
| 3.00   | 1.00   | 7.00   | 3.00   | 1.00   | 1.00   | 1.00   | 1.00   |
| 2.00   | 4.00   | 5.00   | 5.00   | 0.00   | 0.00   | 1.00   | 1.00   |
| #NULL! | #NULL! | #NULL! | #NULL! | #NULL! | #NULL! | #NULL! | #NULL! |
| #NULL! | #NULL! | #NULL! | #NULL! | #NULL! | #NULL! | #NULL! | #NULL! |
| 2.00   | 2.00   | 3.00   | 1.00   | 1.00   | 0.00   | #NULL! | 0.00   |
| 6.00   | 4.00   | 1.00   | 1.00   | 0.00   | 0.00   | 0.00   | 0.00   |
| 2.00   | 2.00   | 1.95   | 17.00  | 1.00   | 3.00   | 2.00   | 1.00   |
| 3.00   | 5.00   | 2.00   | 4.00   | #NULL! | #NULL! | #NULL! | #NULL! |
| 4.00   | 0.00   | 6.00   | 4.00   | 4.00   | 2.00   | 1.00   | 0.00   |
| 0.00   | 1.00   | 4.00   | 1.00   | 1.00   | 1.00   | 1.00   | 1.00   |
| 7.00   | 3.00   | 3.00   | 4.00   | 1.00   | 1.00   | 0.00   | 0.00   |
| 9.00   | 1.00   | 4.00   | 0.00   | 0.00   | 1.00   | 0.00   | 0.00   |

|        |        |        |        |        |        |        |        |
|--------|--------|--------|--------|--------|--------|--------|--------|
| #NULL! | #NULL! | #NULL! | #NULL! | #NULL! | #NULL! | #NULL! | #NULL! |
| 0.00   | 0.00   | 0.00   | 5.00   | 0.00   | 1.00   | 0.00   | 2.00   |
| 12.00  | 5.37   | 2.00   | 14.00  | 0.00   | 0.00   | 0.00   | 4.00   |
| 3.00   | 3.00   | 0.00   | 2.00   | 3.00   | 1.00   | 1.00   | 4.00   |
| 2.00   | 5.00   | 1.00   | 2.00   | #NULL! | #NULL! | #NULL! | #NULL! |
| 2.00   | 15.00  | 7.00   | 4.00   | 0.00   | 0.00   | 0.00   | 0.00   |
| 1.00   | 1.00   | 4.00   | 14.00  | 0.00   | 3.00   | 0.00   | 3.00   |
| 14.68  | 23.00  | 6.00   | 10.00  | 0.00   | 0.00   | 0.00   | 0.00   |
| 3.00   | 6.00   | 1.00   | 2.00   | 1.00   | 3.00   | 4.00   | 4.00   |
| 2.00   | 11.00  | 0.00   | 3.00   | 1.00   | 1.00   | 1.00   | 1.00   |
| 3.00   | 2.00   | 7.00   | 3.00   | 1.00   | 1.00   | 2.00   | 2.00   |
| 9.00   | 0.00   | 7.00   | 14.00  | 1.00   | 2.00   | 0.00   | 1.00   |
| 19.00  | 18.00  | 9.00   | 1.00   | 3.00   | 0.00   | 0.00   | 2.00   |
| 7.00   | 5.32   | 5.00   | 21.00  | 1.00   | 1.00   | 1.00   | 1.00   |
| 7.00   | 4.00   | 8.37   | 4.93   | 1.00   | 1.00   | 3.00   | 0.00   |
| 5.00   | 17.00  | 15.00  | 8.00   | #NULL! | #NULL! | #NULL! | #NULL! |
| 0.00   | 7.00   | 8.00   | 0.00   | 1.00   | 2.00   | 1.00   | 1.00   |
| 6.00   | 2.00   | 0.00   | 6.00   | 0.00   | 1.00   | 0.00   | 1.00   |
| 4.00   | 1.00   | 4.00   | 17.00  | 3.00   | 0.00   | 0.00   | 0.00   |
| 1.00   | 6.00   | 2.00   | 2.00   | #NULL! | #NULL! | #NULL! | #NULL! |
| 1.00   | 16.00  | 1.00   | 4.00   | 0.00   | 1.00   | 0.00   | 0.00   |
| 0.00   | 5.00   | 1.00   | 9.00   | #NULL! | #NULL! | #NULL! | #NULL! |
| 8.00   | 9.00   | 1.00   | 9.00   | 1.00   | 1.00   | 1.00   | 0.00   |
| 3.00   | 0.00   | 6.00   | 13.00  | 1.00   | 1.00   | 1.00   | 0.00   |
| 7.00   | 2.00   | 7.00   | 0.00   | 0.00   | 1.00   | 0.00   | 2.00   |
| 9.00   | 2.00   | 14.00  | 1.60   | 0.00   | 2.00   | 0.00   | 0.00   |
| 13.00  | 14.00  | 5.00   | 3.00   | 1.00   | 1.00   | 0.00   | 1.00   |
| 7.00   | 13.00  | 2.00   | 10.00  | 0.00   | 3.00   | 1.00   | 0.00   |
| 2.00   | 5.00   | 6.00   | 1.00   | 3.00   | 1.00   | 0.00   | 1.00   |
| 5.00   | 1.00   | 1.00   | 2.00   | 1.00   | 2.00   | 0.00   | 0.00   |
| 0.00   | 4.00   | 0.00   | 7.00   | 4.00   | 1.00   | 0.00   | 0.00   |
| 0.00   | 2.00   | 12.00  | 4.33   | #NULL! | #NULL! | #NULL! | #NULL! |
| 6.00   | 2.00   | 10.00  | 5.00   | 3.00   | 0.00   | 2.00   | 1.00   |
| 1.00   | 14.00  | 1.63   | 12.00  | #NULL! | #NULL! | #NULL! | #NULL! |
| 1.68   | 1.00   | 5.00   | 1.00   | 4.00   | 2.00   | 2.00   | 0.00   |
| 4.00   | 10.00  | 3.00   | 2.00   | 1.00   | 1.00   | 1.00   | 1.00   |
| 4.00   | 4.00   | 4.00   | 4.00   | #NULL! | #NULL! | #NULL! | #NULL! |
| 13.00  | 27.00  | 1.00   | 2.00   | 2.00   | 3.00   | 0.00   | 1.00   |
| #NULL! | #NULL! | #NULL! | #NULL! | #NULL! | #NULL! | #NULL! | #NULL! |
| 3.00   | 11.00  | 0.00   | 9.00   | 1.00   | 1.00   | 0.00   | 2.00   |
| 3.00   | 3.00   | 2.00   | 6.00   | #NULL! | #NULL! | #NULL! | #NULL! |
| 6.00   | 1.00   | 6.00   | 1.00   | 1.00   | 2.00   | 1.00   | 1.00   |
| 3.00   | 13.00  | 11.89  | 3.00   | 2.00   | 4.00   | 4.00   | 0.00   |
| #NULL! | #NULL! | #NULL! | #NULL! | #NULL! | #NULL! | #NULL! | #NULL! |
| 1.00   | 12.42  | 4.00   | 1.00   | #NULL! | #NULL! | #NULL! | #NULL! |
| 4.00   | 5.00   | 8.00   | 8.00   | #NULL! | #NULL! | #NULL! | #NULL! |
| 0.74   | 3.00   | 0.32   | 3.00   | 0.00   | 3.00   | 0.00   | 1.00   |
| 6.00   | 10.00  | 7.00   | 3.00   | 1.00   | 1.00   | 1.00   | 1.00   |
| 1.00   | 1.00   | 3.00   | 6.00   | 3.00   | 3.00   | 0.00   | 0.00   |
| 1.00   | 9.00   | 1.00   | 2.00   | #NULL! | #NULL! | #NULL! | #NULL! |
| #NULL! | #NULL! | #NULL! | #NULL! | #NULL! | #NULL! | #NULL! | #NULL! |
| 5.37   | 13.00  | 3.00   | 5.00   | 3.00   | 2.00   | 1.00   | #NULL! |
| 1.00   | 6.00   | 5.00   | 5.00   | 1.00   | 2.00   | 2.00   | 2.00   |
| 0.00   | 21.00  | 9.79   | 5.31   | 0.00   | 3.00   | 2.00   | 1.00   |
| 1.74   | 1.00   | 4.00   | 0.00   | #NULL! | #NULL! | #NULL! | #NULL! |
| 3.00   | 2.00   | 4.00   | 5.00   | 0.00   | 2.00   | 1.00   | 0.00   |

|        |        |        |        |        |        |        |        |
|--------|--------|--------|--------|--------|--------|--------|--------|
| 8.00   | 15.00  | 5.00   | 1.00   | 3.00   | 3.00   | 1.00   | 1.00   |
| 9.00   | 16.00  | 10.00  | 3.00   | 1.00   | 1.00   | 1.00   | 1.00   |
| 4.00   | 5.00   | 1.00   | 7.00   | 2.00   | 1.00   | 1.00   | 1.00   |
| 1.00   | 1.00   | 2.00   | 2.00   | 2.00   | 1.00   | 1.00   | 1.00   |
| 10.00  | 8.00   | 0.00   | 1.00   | 1.00   | 2.00   | 1.00   | 1.00   |
| 12.00  | 4.00   | 8.00   | 6.00   | 2.00   | 2.00   | 1.00   | 1.00   |
| 14.00  | 1.00   | 1.00   | 0.00   | 0.00   | 1.00   | 0.00   | 1.00   |
| 9.00   | 5.00   | 7.00   | 0.00   | #NULL! | #NULL! | #NULL! | #NULL! |
| 3.00   | 4.00   | 2.00   | 3.00   | 1.00   | 2.00   | 0.00   | 1.00   |
| 7.42   | 4.00   | 4.00   | 13.00  | 2.00   | 2.00   | 2.00   | 0.00   |
| 6.00   | 11.00  | 2.00   | 6.00   | 1.00   | 3.00   | 0.00   | 1.00   |
| 9.00   | 5.00   | 8.00   | 7.00   | #NULL! | #NULL! | #NULL! | #NULL! |
| 4.00   | 2.00   | 5.00   | 8.00   | #NULL! | #NULL! | #NULL! | #NULL! |
| 5.21   | 12.00  | 7.00   | 1.00   | 1.00   | 2.00   | 1.00   | 1.00   |
| 6.00   | 0.00   | 2.00   | 1.00   | 2.00   | 2.00   | 2.00   | 1.00   |
| 1.00   | 4.00   | 0.53   | 8.00   | 1.00   | 0.00   | 1.00   | 1.00   |
| 7.00   | 19.42  | 11.00  | 16.00  | 3.00   | 2.00   | #NULL! | 2.00   |
| 3.00   | 6.00   | 6.00   | 10.00  | 2.00   | 3.00   | 2.00   | 2.00   |
| 3.00   | 13.00  | 2.00   | 8.00   | 0.00   | 0.00   | 0.00   | 0.00   |
| 0.00   | 9.00   | 4.00   | 6.00   | 0.00   | 0.00   | 3.00   | 0.00   |
| 5.00   | 9.00   | 1.00   | 21.00  | 0.00   | 2.00   | 0.00   | 0.00   |
| 7.00   | 4.00   | 1.00   | 1.00   | 1.00   | 1.00   | 1.00   | 1.00   |
| #NULL! | #NULL! | #NULL! | #NULL! | #NULL! | #NULL! | #NULL! | #NULL! |
| 4.42   | 7.00   | 12.71  | 0.33   | 1.00   | 1.00   | 2.00   | 1.00   |
| 4.00   | 12.00  | 0.00   | 6.00   | 2.00   | 2.00   | 1.00   | 1.00   |
| 5.00   | 16.00  | 4.00   | 4.00   | 4.00   | 4.00   | 2.00   | 4.00   |
| 2.00   | 5.00   | 4.00   | 1.00   | 3.00   | 2.00   | 2.00   | 1.00   |
| 0.00   | 7.00   | 1.00   | 16.00  | 2.00   | 3.00   | 2.00   | 2.00   |
| 1.00   | 5.00   | 1.00   | 3.00   | 0.00   | 0.00   | 0.00   | 1.00   |
| #NULL! | #NULL! | #NULL! | #NULL! | #NULL! | #NULL! | #NULL! | #NULL! |
| 3.00   | 2.00   | 6.00   | 5.00   | 3.00   | 1.00   | 2.00   | 2.00   |
| 26.00  | 3.00   | 9.68   | 9.00   | 1.00   | 0.00   | 0.00   | 0.00   |
| #NULL! | #NULL! | #NULL! | #NULL! | #NULL! | #NULL! | #NULL! | #NULL! |
| 0.00   | 4.00   | 0.00   | 2.00   | 3.00   | 2.00   | 1.00   | 3.00   |
| 15.00  | 10.00  | 2.00   | 19.00  | 4.00   | 3.00   | 3.00   | 2.00   |
| 2.37   | 5.26   | 8.00   | 5.13   | #NULL! | #NULL! | #NULL! | #NULL! |
| 1.00   | 6.00   | 3.00   | 6.00   | 3.00   | 3.00   | 4.00   | 1.00   |
| 5.00   | 3.00   | 4.32   | 3.00   | 0.00   | 4.00   | 4.00   | 0.00   |
| 7.00   | 3.00   | 3.00   | 4.00   | 1.00   | 1.00   | 2.00   | 1.00   |
| 7.00   | 0.00   | 2.00   | 6.00   | 0.00   | 1.00   | 1.00   | 1.00   |
| 2.00   | 7.00   | 1.00   | 4.80   | 4.00   | 3.00   | 1.00   | 0.00   |
| #NULL! | #NULL! | #NULL! | #NULL! | #NULL! | #NULL! | #NULL! | #NULL! |
| 9.00   | 5.00   | 6.26   | 5.07   | 2.00   | 2.00   | 1.00   | 2.00   |
| 6.00   | 4.00   | 3.00   | 5.00   | #NULL! | #NULL! | #NULL! | #NULL! |
| 12.00  | 0.00   | 13.00  | 5.00   | 1.00   | 1.00   | 1.00   | 0.00   |
| 10.00  | 6.00   | 4.00   | 3.00   | #NULL! | #NULL! | #NULL! | #NULL! |
| 2.00   | 3.00   | 4.00   | 3.00   | 3.00   | 3.00   | 3.00   | 2.00   |
| 1.00   | 4.00   | 0.00   | 2.00   | 2.00   | 1.00   | 1.00   | 0.00   |
| 9.00   | 7.00   | 1.00   | 0.00   | 1.00   | 0.00   | 1.00   | 1.00   |
| 7.00   | 12.00  | 9.00   | 5.00   | 1.00   | 2.00   | 0.00   | 0.00   |
| #NULL! | #NULL! | #NULL! | #NULL! | #NULL! | #NULL! | #NULL! | #NULL! |
| 14.00  | 1.25   | 15.00  | 8.00   | 1.00   | 1.00   | 0.00   | 0.00   |
| 5.00   | 2.00   | 3.00   | 10.80  | 2.00   | 3.00   | 2.00   | 1.00   |
| 10.00  | 1.00   | 2.00   | 10.00  | #NULL! | #NULL! | #NULL! | #NULL! |
| #NULL! | #NULL! | #NULL! | #NULL! | #NULL! | #NULL! | #NULL! | #NULL! |
| 0.00   | 4.00   | 0.00   | 11.00  | 2.00   | 3.00   | 1.00   | 1.00   |



| tas19_P3_a | age_p3 | age_group | d1_product | d2_product | d1_ones | d2_ones | d11_ones |
|------------|--------|-----------|------------|------------|---------|---------|----------|
| 2.00       | 63.00  | 1.00      | 180.00     | 200.00     | 1.00    | 1.00    | 1.00     |
| 0.00       | 65.00  | 1.00      | 120.00     | 17.00      | 0.00    | 0.00    | 0.00     |
| 1.00       | 63.00  | 1.00      | 169.00     | 104.00     | 1.00    | 0.00    | 1.00     |
| #NULL!     | #NULL! | #NULL!    | 54.00      | 48.00      | 0.00    | 0.00    | 0.00     |
| #NULL!     | 63.00  | 1.00      | 12.00      | 70.00      | 0.00    | 0.00    | 0.00     |
| #NULL!     | 50.00  | 1.00      | 1.00       | 0.00       | 0.00    | 0.00    | 0.00     |
| 2.00       | 49.00  | 1.00      | 27.00      | 14.00      | 0.00    | 0.00    | 0.00     |
| 1.00       | 78.00  | 1.00      | 20.00      | 35.00      | 0.00    | 0.00    | 0.00     |
| 4.00       | 59.00  | 1.00      | 42.00      | 60.00      | 0.00    | 0.00    | 0.00     |
| #NULL!     | #NULL! | #NULL!    | 0.00       | 4.00       | 0.00    | 0.00    | 0.00     |
| 0.00       | 68.00  | 1.00      | 12.00      | 44.00      | 0.00    | 0.00    | 0.00     |
| 1.00       | 69.00  | 1.00      | 64.00      | 40.00      | 0.00    | 0.00    | 0.00     |
| 0.00       | 52.00  | 1.00      | 48.00      | 20.00      | 0.00    | 0.00    | 0.00     |
| #NULL!     | #NULL! | #NULL!    | 0.00       | 0.00       | 0.00    | 0.00    | 0.00     |
| 2.00       | 82.00  | 1.00      | 80.00      | 208.00     | 0.00    | 1.00    | 0.00     |
| #NULL!     | 52.00  | 1.00      | 80.00      | 12.00      | 0.00    | 0.00    | 0.00     |
| 1.00       | 70.00  | 1.00      | 48.00      | 27.00      | 0.00    | 0.00    | 0.00     |
| 2.00       | 72.00  | 1.00      | 102.00     | 0.00       | 0.00    | 0.00    | 0.00     |
| 2.00       | 87.00  | 1.00      | 120.00     | 240.00     | 0.00    | 1.00    | 0.00     |
| 3.00       | 72.00  | 1.00      | 225.00     | 150.00     | 1.00    | 1.00    | 1.00     |
| 2.00       | 51.00  | 1.00      | 12.00      | 6.00       | 0.00    | 0.00    | 0.00     |
| 0.00       | 68.00  | 1.00      | 35.00      | 0.00       | 0.00    | 0.00    | 0.00     |
| 2.00       | 59.00  | 1.00      | 44.00      | 0.00       | 0.00    | 0.00    | 0.00     |
| 2.00       | 46.00  | 1.00      | 49.00      | 108.00     | 0.00    | 0.00    | 0.00     |
| 0.00       | 64.00  | 1.00      | 143.00     | 96.00      | 1.00    | 0.00    | 1.00     |
| 0.00       | 65.00  | 1.00      | 25.00      | 4.00       | 0.00    | 0.00    | 0.00     |
| 0.00       | 62.00  | 1.00      | 0.00       | 0.00       | 0.00    | 0.00    | 0.00     |
| 1.00       | 51.00  | 1.00      | 98.00      | 66.00      | 0.00    | 0.00    | 0.00     |
| #NULL!     | 68.00  | 1.00      | 60.00      | 63.00      | 0.00    | 0.00    | 0.00     |
| 2.00       | 61.00  | 1.00      | 54.00      | 54.00      | 0.00    | 0.00    | 0.00     |
| 2.00       | 68.00  | 1.00      | 16.00      | 72.00      | 0.00    | 0.00    | 0.00     |
| 1.00       | 74.00  | 1.00      | 20.00      | 10.00      | 0.00    | 0.00    | 0.00     |
| 1.00       | 55.00  | 1.00      | 224.00     | 210.00     | 1.00    | 1.00    | 1.00     |
| 3.00       | 63.00  | 1.00      | 114.00     | 91.00      | 0.00    | 0.00    | 0.00     |
| #NULL!     | #NULL! | #NULL!    | #NULL!     | 42.00      | 0.00    | 0.00    | 0.00     |
| #NULL!     | #NULL! | #NULL!    | #NULL!     | 18.00      | 0.00    | 0.00    | 0.00     |
| #NULL!     | #NULL! | #NULL!    | #NULL!     | 399.00     | 0.00    | 1.00    | 0.00     |
| #NULL!     | #NULL! | #NULL!    | #NULL!     | 54.00      | 0.00    | 0.00    | 0.00     |
| #NULL!     | 68.00  | 1.00      | 40.00      | 27.00      | 0.00    | 0.00    | 0.00     |
| 1.00       | 62.00  | 1.00      | 54.00      | 63.00      | 0.00    | 0.00    | 0.00     |
| 2.00       | 95.00  | 1.00      | 42.00      | 0.00       | 0.00    | 0.00    | 0.00     |
| 1.00       | 80.00  | 1.00      | 9.00       | 24.00      | 0.00    | 0.00    | 0.00     |
| 2.00       | 64.00  | 1.00      | 88.00      | 48.00      | 0.00    | 0.00    | 0.00     |
| #NULL!     | 69.00  | 1.00      | 36.00      | 0.00       | 0.00    | 0.00    | 0.00     |
| #NULL!     | #NULL! | #NULL!    | 14.00      | 0.00       | 0.00    | 0.00    | 0.00     |
| 3.00       | 46.00  | 1.00      | 15.00      | 3.00       | 0.00    | 0.00    | 0.00     |
| 0.00       | 64.00  | 1.00      | 63.00      | 6.00       | 0.00    | 0.00    | 0.00     |
| #NULL!     | 59.00  | 1.00      | 40.00      | 196.00     | 0.00    | 1.00    | 0.00     |
| 1.00       | 58.00  | 1.00      | 143.00     | 224.00     | 1.00    | 1.00    | 1.00     |
| 0.00       | 60.00  | 1.00      | 0.00       | 12.00      | 0.00    | 0.00    | 0.00     |
| 0.00       | 68.00  | 1.00      | 12.00      | 30.00      | 0.00    | 0.00    | 0.00     |
| #NULL!     | 66.00  | 1.00      | 66.00      | 10.00      | 0.00    | 0.00    | 0.00     |
| 0.00       | 66.00  | 1.00      | 20.00      | 0.00       | 0.00    | 0.00    | 0.00     |
| 0.00       | 72.00  | 1.00      | 88.00      | 77.00      | 0.00    | 0.00    | 0.00     |
| #NULL!     | 62.00  | 1.00      | 110.00     | 156.00     | 0.00    | 1.00    | 0.00     |

|        |        |        |        |        |      |      |      |
|--------|--------|--------|--------|--------|------|------|------|
| 2.00   | 69.00  | 1.00   | 126.00 | 68.00  | 0.00 | 0.00 | 0.00 |
| 0.00   | 63.00  | 1.00   | 24.00  | 28.00  | 0.00 | 0.00 | 0.00 |
| 1.00   | 49.00  | 1.00   | 56.00  | 0.00   | 0.00 | 0.00 | 0.00 |
| 4.00   | 68.00  | 1.00   | 255.00 | 140.00 | 1.00 | 1.00 | 1.00 |
| 4.00   | 68.00  | 1.00   | 120.00 | 35.00  | 0.00 | 0.00 | 0.00 |
| #NULL! | 67.00  | 1.00   | 55.00  | 18.00  | 0.00 | 0.00 | 0.00 |
| 2.00   | 69.00  | 1.00   | 57.00  | 24.00  | 0.00 | 0.00 | 0.00 |
| 1.00   | 65.00  | 1.00   | 56.00  | 0.00   | 0.00 | 0.00 | 0.00 |
| 2.00   | 46.00  | 1.00   | 56.00  | 153.00 | 0.00 | 1.00 | 0.00 |
| 2.00   | 78.00  | 1.00   | 143.00 | 224.00 | 1.00 | 1.00 | 1.00 |
| 2.00   | 76.00  | 1.00   | 5.00   | 0.00   | 0.00 | 0.00 | 0.00 |
| 4.00   | 75.00  | 1.00   | 132.00 | 96.00  | 1.00 | 0.00 | 0.00 |
| 0.00   | 77.00  | 1.00   | 35.00  | 8.00   | 0.00 | 0.00 | 0.00 |
| 2.00   | 77.00  | 1.00   | 44.00  | 119.00 | 0.00 | 0.00 | 0.00 |
| 2.00   | 62.00  | 1.00   | 306.00 | 352.00 | 1.00 | 1.00 | 1.00 |
| 0.00   | 46.00  | 1.00   | 135.00 | 40.00  | 1.00 | 0.00 | 1.00 |
| 1.00   | 60.00  | 1.00   | 33.00  | 45.00  | 0.00 | 0.00 | 0.00 |
| 1.00   | 57.00  | 1.00   | 36.00  | 26.00  | 0.00 | 0.00 | 0.00 |
| 2.00   | 56.00  | 1.00   | 98.00  | 96.00  | 0.00 | 0.00 | 0.00 |
| 1.00   | 53.00  | 1.00   | 99.00  | 84.00  | 0.00 | 0.00 | 0.00 |
| 4.00   | 55.00  | 1.00   | 22.00  | 20.00  | 0.00 | 0.00 | 0.00 |
| 1.00   | 65.00  | 1.00   | 54.00  | 15.00  | 0.00 | 0.00 | 0.00 |
| #NULL! | 47.00  | 1.00   | 72.00  | 169.00 | 0.00 | 1.00 | 0.00 |
| #NULL! | 56.00  | 1.00   | 90.00  | 224.00 | 0.00 | 1.00 | 0.00 |
| 0.00   | 60.00  | 1.00   | 288.00 | 210.00 | 1.00 | 1.00 | 1.00 |
| 1.00   | 61.00  | 1.00   | 28.00  | 30.00  | 0.00 | 0.00 | 0.00 |
| 2.00   | 61.00  | 1.00   | 143.00 | 91.00  | 1.00 | 0.00 | 1.00 |
| 0.00   | 52.00  | 1.00   | 0.00   | 5.00   | 0.00 | 0.00 | 0.00 |
| 2.00   | 78.00  | 1.00   | 208.00 | 150.00 | 1.00 | 1.00 | 1.00 |
| 1.00   | 51.00  | 1.00   | 21.00  | 60.00  | 0.00 | 0.00 | 0.00 |
| 1.00   | 55.00  | 1.00   | 2.00   | 0.00   | 0.00 | 0.00 | 0.00 |
| 0.00   | 58.00  | 1.00   | 170.00 | 160.00 | 1.00 | 1.00 | 1.00 |
| 0.00   | 53.00  | 1.00   | 104.00 | 38.00  | 0.00 | 0.00 | 0.00 |
| 1.00   | 59.00  | 1.00   | 40.00  | 15.00  | 0.00 | 0.00 | 0.00 |
| 1.00   | 61.00  | 1.00   | 12.00  | 0.00   | 0.00 | 0.00 | 0.00 |
| #NULL! | #NULL! | #NULL! | 24.00  | 9.00   | 0.00 | 0.00 | 0.00 |
| 2.00   | 57.00  | 1.00   | 24.00  | 117.00 | 0.00 | 0.00 | 0.00 |
| #NULL! | #NULL! | #NULL! | 120.00 | 112.00 | 0.00 | 0.00 | 0.00 |
| #NULL! | 49.00  | 1.00   | 588.00 | 625.00 | 1.00 | 1.00 | 1.00 |
| 1.00   | 70.00  | 1.00   | 14.00  | 0.00   | 0.00 | 0.00 | 0.00 |
| 1.00   | 67.00  | 1.00   | 32.00  | 45.00  | 0.00 | 0.00 | 0.00 |
| 3.00   | 59.00  | 1.00   | 70.00  | 30.00  | 0.00 | 0.00 | 0.00 |
| 1.00   | 59.00  | 1.00   | 147.00 | 156.00 | 1.00 | 1.00 | 1.00 |
| 0.00   | 70.00  | 1.00   | 24.00  | 16.00  | 0.00 | 0.00 | 0.00 |
| 1.00   | 54.00  | 1.00   | 272.00 | 112.00 | 1.00 | 0.00 | 1.00 |
| 2.00   | 75.00  | 1.00   | 156.00 | 320.00 | 1.00 | 1.00 | 1.00 |
| 1.00   | 60.00  | 1.00   | 132.00 | 204.00 | 1.00 | 1.00 | 0.00 |
| 3.00   | 52.00  | 1.00   | 96.00  | 132.00 | 0.00 | 1.00 | 0.00 |
| #NULL! | #NULL! | #NULL! | 0.00   | 0.00   | 0.00 | 0.00 | 0.00 |
| 1.00   | 50.00  | 1.00   | 90.00  | 90.00  | 0.00 | 0.00 | 0.00 |
| #NULL! | 73.00  | 1.00   | 0.00   | 0.00   | 0.00 | 0.00 | 0.00 |
| 1.00   | 50.00  | 1.00   | 0.00   | 4.00   | 0.00 | 0.00 | 0.00 |
| 3.00   | 62.00  | 1.00   | 22.00  | 24.00  | 0.00 | 0.00 | 0.00 |
| 0.00   | 49.00  | 1.00   | 55.00  | 132.00 | 0.00 | 1.00 | 0.00 |
| #NULL! | 61.00  | 1.00   | #NULL! | #NULL! | 0.00 | 0.00 | 0.00 |
| 2.00   | 64.00  | 1.00   | 119.00 | 160.00 | 0.00 | 1.00 | 0.00 |

|        |        |        |        |        |      |      |      |
|--------|--------|--------|--------|--------|------|------|------|
| 0.00   | 64.00  | 1.00   | 12.00  | 80.00  | 0.00 | 0.00 | 0.00 |
| 1.00   | 72.00  | 1.00   | 64.00  | 27.00  | 0.00 | 0.00 | 0.00 |
| 3.00   | 48.00  | 1.00   | 35.00  | 210.00 | 0.00 | 1.00 | 0.00 |
| #NULL! | 62.00  | 1.00   | 189.00 | 189.00 | 1.00 | 1.00 | 1.00 |
| 1.00   | 63.00  | 1.00   | 56.00  | 8.00   | 0.00 | 0.00 | 0.00 |
| #NULL! | 87.00  | 1.00   | 44.00  | 33.00  | 0.00 | 0.00 | 0.00 |
| 1.00   | 64.00  | 1.00   | 35.00  | 84.00  | 0.00 | 0.00 | 0.00 |
| #NULL! | 47.00  | 1.00   | 15.00  | 5.00   | 0.00 | 0.00 | 0.00 |
| #NULL! | 51.00  | 1.00   | 84.00  | 21.00  | 0.00 | 0.00 | 0.00 |
| 1.00   | 47.00  | 1.00   | 252.00 | 323.00 | 1.00 | 1.00 | 1.00 |
| 0.00   | 58.00  | 1.00   | 39.00  | 28.00  | 0.00 | 0.00 | 0.00 |
| 2.00   | 61.00  | 1.00   | 240.00 | 90.00  | 1.00 | 0.00 | 1.00 |
| 1.00   | 69.00  | 1.00   | 88.00  | 32.00  | 0.00 | 0.00 | 0.00 |
| #NULL! | 54.00  | 1.00   | 0.00   | 0.00   | 0.00 | 0.00 | 0.00 |
| 1.00   | 57.00  | 1.00   | 60.00  | 24.00  | 0.00 | 0.00 | 0.00 |
| #NULL! | 76.00  | 1.00   | 224.00 | 324.00 | 1.00 | 1.00 | 1.00 |
| 1.00   | 62.00  | 1.00   | 0.00   | 0.00   | 0.00 | 0.00 | 0.00 |
| #NULL! | 58.00  | 1.00   | 24.00  | 0.00   | 0.00 | 0.00 | 0.00 |
| 0.00   | 73.00  | 1.00   | 39.00  | 48.00  | 0.00 | 0.00 | 0.00 |
| #NULL! | 66.00  | 1.00   | 132.00 | 120.00 | 1.00 | 0.00 | 0.00 |
| #NULL! | 59.00  | 1.00   | 110.00 | 120.00 | 0.00 | 0.00 | 0.00 |
| 3.00   | 49.00  | 1.00   | 64.00  | 140.00 | 0.00 | 1.00 | 0.00 |
| #NULL! | 59.00  | 1.00   | 240.00 | 320.00 | 1.00 | 1.00 | 1.00 |
| 2.00   | 46.00  | 1.00   | 81.00  | 35.00  | 0.00 | 0.00 | 0.00 |
| 1.00   | 64.00  | 1.00   | 190.00 | 40.00  | 1.00 | 0.00 | 1.00 |
| 1.00   | 46.00  | 1.00   | 228.00 | 378.00 | 1.00 | 1.00 | 1.00 |
| #NULL! | 59.00  | 1.00   | 20.00  | 36.00  | 0.00 | 0.00 | 0.00 |
| 1.00   | 57.00  | 1.00   | 162.00 | 36.00  | 1.00 | 0.00 | 1.00 |
| #NULL! | 67.00  | 1.00   | 0.00   | 0.00   | 0.00 | 0.00 | 0.00 |
| #NULL! | 55.00  | 1.00   | 240.00 | 299.00 | 1.00 | 1.00 | 1.00 |
| #NULL! | 56.00  | 1.00   | 117.00 | 112.00 | 0.00 | 0.00 | 0.00 |
| 0.00   | 45.00  | 1.00   | 3.00   | 8.00   | 0.00 | 0.00 | 0.00 |
| 0.00   | 70.00  | 1.00   | 121.00 | 91.00  | 0.00 | 0.00 | 0.00 |
| 2.00   | 66.00  | 1.00   | 75.00  | 176.00 | 0.00 | 1.00 | 0.00 |
| 2.00   | 73.00  | 1.00   | 132.00 | 150.00 | 1.00 | 1.00 | 0.00 |
| 0.00   | 73.00  | 1.00   | 39.00  | 18.00  | 0.00 | 0.00 | 0.00 |
| #NULL! | 78.00  | 1.00   | 12.00  | 20.00  | 0.00 | 0.00 | 0.00 |
| 1.00   | 55.00  | 1.00   | 272.00 | 132.00 | 1.00 | 1.00 | 1.00 |
| 1.00   | 65.00  | 1.00   | 152.00 | 160.00 | 1.00 | 1.00 | 1.00 |
| #NULL! | 58.00  | 1.00   | 60.00  | 110.00 | 0.00 | 0.00 | 0.00 |
| 0.00   | 71.00  | 1.00   | 72.00  | 24.00  | 0.00 | 0.00 | 0.00 |
| 1.00   | 52.00  | 1.00   | 198.00 | 330.00 | 1.00 | 1.00 | 1.00 |
| 2.00   | 47.00  | 1.00   | 252.00 | 234.00 | 1.00 | 1.00 | 1.00 |
| 2.00   | 55.00  | 1.00   | 144.00 | 48.00  | 1.00 | 0.00 | 1.00 |
| 0.00   | 67.00  | 1.00   | 40.00  | 16.00  | 0.00 | 0.00 | 0.00 |
| 1.00   | 67.00  | 1.00   | 150.00 | 49.00  | 1.00 | 0.00 | 1.00 |
| #NULL! | #NULL! | #NULL! | 120.00 | 198.00 | 0.00 | 1.00 | 0.00 |
| #NULL! | 76.00  | 1.00   | 16.00  | 70.00  | 0.00 | 0.00 | 0.00 |
| 2.00   | 55.00  | 1.00   | 96.00  | 80.00  | 0.00 | 0.00 | 0.00 |
| 3.00   | 58.00  | 1.00   | 30.00  | 0.00   | 0.00 | 0.00 | 0.00 |
| 2.00   | 74.00  | 1.00   | 28.00  | 12.00  | 0.00 | 0.00 | 0.00 |
| #NULL! | 69.00  | 1.00   | 143.00 | 80.00  | 1.00 | 0.00 | 1.00 |
| 1.00   | 53.00  | 1.00   | 2.00   | 7.00   | 0.00 | 0.00 | 0.00 |
| 1.00   | 57.00  | 1.00   | 36.00  | 40.00  | 0.00 | 0.00 | 0.00 |
| 1.00   | 54.00  | 1.00   | 144.00 | 98.00  | 1.00 | 0.00 | 1.00 |
| 1.00   | 53.00  | 1.00   | 65.00  | 117.00 | 0.00 | 0.00 | 0.00 |

|        |        |        |        |        |      |      |      |
|--------|--------|--------|--------|--------|------|------|------|
| #NULL! | #NULL! | #NULL! | 143.00 | 98.00  | 1.00 | 0.00 | 1.00 |
| 0.00   | 50.00  | 1.00   | 36.00  | 0.00   | 0.00 | 0.00 | 0.00 |
| 0.00   | 55.00  | 1.00   | 21.00  | 0.00   | 0.00 | 0.00 | 0.00 |
| 4.00   | 69.00  | 1.00   | 224.00 | 342.00 | 1.00 | 1.00 | 1.00 |
| #NULL! | 55.00  | 1.00   | 119.00 | 161.00 | 0.00 | 1.00 | 0.00 |
| 0.00   | 70.00  | 1.00   | 63.00  | 28.00  | 0.00 | 0.00 | 0.00 |
| 3.00   | 56.00  | 1.00   | 40.00  | 35.00  | 0.00 | 0.00 | 0.00 |
| 0.00   | 48.00  | 1.00   | 48.00  | 12.00  | 0.00 | 0.00 | 0.00 |
| 4.00   | 69.00  | 1.00   | 135.00 | 208.00 | 1.00 | 1.00 | 1.00 |
| 1.00   | 66.00  | 1.00   | 99.00  | 51.00  | 0.00 | 0.00 | 0.00 |
| 1.00   | 77.00  | 1.00   | 72.00  | 140.00 | 0.00 | 1.00 | 0.00 |
| 2.00   | 48.00  | 1.00   | 126.00 | 150.00 | 0.00 | 1.00 | 0.00 |
| 3.00   | 59.00  | 1.00   | 270.00 | 54.00  | 1.00 | 0.00 | 1.00 |
| 1.00   | 51.00  | 1.00   | 66.00  | 84.00  | 0.00 | 0.00 | 0.00 |
| 4.00   | 61.00  | 1.00   | 323.00 | 342.00 | 1.00 | 1.00 | 1.00 |
| #NULL! | 67.00  | 1.00   | 560.00 | 216.00 | 1.00 | 1.00 | 1.00 |
| 2.00   | 69.00  | 1.00   | 160.00 | 210.00 | 1.00 | 1.00 | 1.00 |
| 1.00   | 69.00  | 1.00   | 234.00 | 135.00 | 1.00 | 1.00 | 1.00 |
| 1.00   | 68.00  | 1.00   | 78.00  | 104.00 | 0.00 | 0.00 | 0.00 |
| #NULL! | 77.00  | 1.00   | 36.00  | 0.00   | 0.00 | 0.00 | 0.00 |
| 0.00   | 75.00  | 1.00   | 5.00   | 10.00  | 0.00 | 0.00 | 0.00 |
| #NULL! | 67.00  | 1.00   | 49.00  | 55.00  | 0.00 | 0.00 | 0.00 |
| 2.00   | 49.00  | 1.00   | 20.00  | 0.00   | 0.00 | 0.00 | 0.00 |
| 1.00   | 52.00  | 1.00   | 132.00 | 56.00  | 1.00 | 0.00 | 0.00 |
| 1.00   | 69.00  | 1.00   | 54.00  | 6.00   | 0.00 | 0.00 | 0.00 |
| 0.00   | 68.00  | 1.00   | 8.00   | 25.00  | 0.00 | 0.00 | 0.00 |
| 0.00   | 54.00  | 1.00   | 21.00  | 56.00  | 0.00 | 0.00 | 0.00 |
| 0.00   | 60.00  | 1.00   | 5.00   | 0.00   | 0.00 | 0.00 | 0.00 |
| 0.00   | 69.00  | 1.00   | 210.00 | 70.00  | 1.00 | 0.00 | 1.00 |
| 1.00   | 53.00  | 1.00   | 112.00 | 96.00  | 0.00 | 0.00 | 0.00 |
| 1.00   | 46.00  | 1.00   | 21.00  | 39.00  | 0.00 | 0.00 | 0.00 |
| #NULL! | 80.00  | 1.00   | 299.00 | 384.00 | 1.00 | 1.00 | 1.00 |
| 1.00   | 79.00  | 1.00   | 247.00 | 484.00 | 1.00 | 1.00 | 1.00 |
| #NULL! | 61.00  | 1.00   | 30.00  | 6.00   | 0.00 | 0.00 | 0.00 |
| 2.00   | 61.00  | 1.00   | 182.00 | 176.00 | 1.00 | 1.00 | 1.00 |
| 1.00   | 75.00  | 1.00   | 77.00  | 108.00 | 0.00 | 0.00 | 0.00 |
| #NULL! | 66.00  | 1.00   | 72.00  | 36.00  | 0.00 | 0.00 | 0.00 |
| 1.00   | 45.00  | 1.00   | 400.00 | 270.00 | 1.00 | 1.00 | 1.00 |
| #NULL! | 57.00  | 1.00   | 624.00 | 504.00 | 1.00 | 1.00 | 1.00 |
| 2.00   | 70.00  | 1.00   | 84.00  | 88.00  | 0.00 | 0.00 | 0.00 |
| #NULL! | 78.00  | 1.00   | 108.00 | 64.00  | 0.00 | 0.00 | 0.00 |
| 2.00   | 59.00  | 1.00   | 64.00  | 15.00  | 0.00 | 0.00 | 0.00 |
| 3.00   | 68.00  | 1.00   | 357.00 | 322.00 | 1.00 | 1.00 | 1.00 |
| #NULL! | #NULL! | #NULL! | 11.00  | 65.00  | 0.00 | 0.00 | 0.00 |
| #NULL! | 59.00  | 1.00   | 32.00  | 42.00  | 0.00 | 0.00 | 0.00 |
| #NULL! | 55.00  | 1.00   | 136.00 | 176.00 | 1.00 | 1.00 | 1.00 |
| 1.00   | 60.00  | 1.00   | 9.00   | 6.00   | 0.00 | 0.00 | 0.00 |
| 1.00   | 75.00  | 1.00   | 165.00 | 14.00  | 1.00 | 0.00 | 1.00 |
| 0.00   | 45.00  | 1.00   | 56.00  | 5.00   | 0.00 | 0.00 | 0.00 |
| #NULL! | 54.00  | 1.00   | 165.00 | 180.00 | 1.00 | 1.00 | 1.00 |
| #NULL! | 59.00  | 1.00   | 14.00  | 39.00  | 0.00 | 0.00 | 0.00 |
| 1.00   | 63.00  | 1.00   | 39.00  | 60.00  | 0.00 | 0.00 | 0.00 |
| 2.00   | 73.00  | 1.00   | 56.00  | 60.00  | 0.00 | 0.00 | 0.00 |
| 1.00   | 51.00  | 1.00   | 140.00 | 96.00  | 1.00 | 0.00 | 1.00 |
| #NULL! | 57.00  | 1.00   | 77.00  | 8.00   | 0.00 | 0.00 | 0.00 |
| 3.00   | 50.00  | 1.00   | 72.00  | 42.00  | 0.00 | 0.00 | 0.00 |



|        |        |        |        |        |      |      |      |
|--------|--------|--------|--------|--------|------|------|------|
| 1.00   | 70.00  | 1.00   | 340.00 | 240.00 | 1.00 | 1.00 | 1.00 |
| 1.00   | 57.00  | 1.00   | 5.00   | 10.00  | 0.00 | 0.00 | 0.00 |
| 1.00   | 50.00  | 1.00   | 126.00 | 136.00 | 0.00 | 1.00 | 0.00 |
| 1.00   | 71.00  | 1.00   | 60.00  | 99.00  | 0.00 | 0.00 | 0.00 |
| 1.00   | 51.00  | 1.00   | 182.00 | 304.00 | 1.00 | 1.00 | 1.00 |
| 2.00   | 68.00  | 1.00   | 192.00 | 144.00 | 1.00 | 1.00 | 1.00 |
| 4.00   | 66.00  | 1.00   | 5.00   | 8.00   | 0.00 | 0.00 | 0.00 |
| #NULL! | 77.00  | 1.00   | 54.00  | 16.00  | 0.00 | 0.00 | 0.00 |
| 3.00   | 56.00  | 1.00   | 99.00  | 45.00  | 0.00 | 0.00 | 0.00 |
| 2.00   | 55.00  | 1.00   | 110.00 | 63.00  | 0.00 | 0.00 | 0.00 |
| 1.00   | 56.00  | 1.00   | 0.00   | 0.00   | 0.00 | 0.00 | 0.00 |
| #NULL! | 76.00  | 1.00   | 84.00  | 48.00  | 0.00 | 0.00 | 0.00 |
| #NULL! | 59.00  | 1.00   | 30.00  | 65.00  | 0.00 | 0.00 | 0.00 |
| 2.00   | 54.00  | 1.00   | 153.00 | 440.00 | 1.00 | 1.00 | 1.00 |
| 2.00   | 47.00  | 1.00   | 143.00 | 169.00 | 1.00 | 1.00 | 1.00 |
| 1.00   | 64.00  | 1.00   | 104.00 | 154.00 | 0.00 | 1.00 | 0.00 |
| 0.00   | 56.00  | 1.00   | 288.00 | 138.00 | 1.00 | 1.00 | 1.00 |
| 3.00   | 54.00  | 1.00   | 105.00 | 72.00  | 0.00 | 0.00 | 0.00 |
| 0.00   | 85.00  | 1.00   | 95.00  | 120.00 | 0.00 | 0.00 | 0.00 |
| 0.00   | 52.00  | 1.00   | 0.00   | 6.00   | 0.00 | 0.00 | 0.00 |
| 1.00   | 59.00  | 1.00   | 8.00   | 0.00   | 0.00 | 0.00 | 0.00 |
| 1.00   | 55.00  | 1.00   | 1.00   | 6.00   | 0.00 | 0.00 | 0.00 |
| #NULL! | #NULL! | #NULL! | 56.00  | 18.00  | 0.00 | 0.00 | 0.00 |
| #NULL! | 56.00  | 1.00   | 84.00  | 44.00  | 0.00 | 0.00 | 0.00 |
| 1.00   | 59.00  | 1.00   | 32.00  | 64.00  | 0.00 | 0.00 | 0.00 |
| 2.00   | 66.00  | 1.00   | 420.00 | 588.00 | 1.00 | 1.00 | 1.00 |
| 2.00   | 53.00  | 1.00   | 112.00 | 84.00  | 0.00 | 0.00 | 0.00 |
| 3.00   | 50.00  | 1.00   | 143.00 | 12.00  | 1.00 | 0.00 | 1.00 |
| 0.00   | 63.00  | 1.00   | 99.00  | 154.00 | 0.00 | 1.00 | 0.00 |
| #NULL! | #NULL! | #NULL! | 90.00  | 15.00  | 0.00 | 0.00 | 0.00 |
| 1.00   | 48.00  | 1.00   | 352.00 | 360.00 | 1.00 | 1.00 | 1.00 |
| 1.00   | 70.00  | 1.00   | 8.00   | 16.00  | 0.00 | 0.00 | 0.00 |
| #NULL! | #NULL! | #NULL! | 104.00 | 200.00 | 0.00 | 1.00 | 0.00 |
| 2.00   | 73.00  | 1.00   | 30.00  | 0.00   | 0.00 | 0.00 | 0.00 |
| 1.00   | 62.00  | 1.00   | 40.00  | 30.00  | 0.00 | 0.00 | 0.00 |
| #NULL! | 63.00  | 1.00   | 30.00  | 65.00  | 0.00 | 0.00 | 0.00 |
| 2.00   | 76.00  | 1.00   | 18.00  | 64.00  | 0.00 | 0.00 | 0.00 |
| 0.00   | 66.00  | 1.00   | 6.00   | 3.00   | 0.00 | 0.00 | 0.00 |
| 1.00   | 70.00  | 1.00   | 45.00  | 54.00  | 0.00 | 0.00 | 0.00 |
| 1.00   | 65.00  | 1.00   | 16.00  | 52.00  | 0.00 | 0.00 | 0.00 |
| 2.00   | 74.00  | 1.00   | 48.00  | 27.00  | 0.00 | 0.00 | 0.00 |
| #NULL! | 58.00  | 1.00   | 187.00 | 253.00 | 1.00 | 1.00 | 1.00 |
| 2.00   | 77.00  | 1.00   | 176.00 | 7.00   | 1.00 | 0.00 | 1.00 |
| #NULL! | 68.00  | 1.00   | 8.00   | 24.00  | 0.00 | 0.00 | 0.00 |
| 0.00   | 56.00  | 1.00   | 160.00 | 110.00 | 1.00 | 0.00 | 1.00 |
| #NULL! | 86.00  | 1.00   | 36.00  | 70.00  | 0.00 | 0.00 | 0.00 |
| 3.00   | 80.00  | 1.00   | 84.00  | 104.00 | 0.00 | 0.00 | 0.00 |
| 2.00   | 66.00  | 1.00   | 18.00  | 21.00  | 0.00 | 0.00 | 0.00 |
| 1.00   | 54.00  | 1.00   | 112.00 | 136.00 | 0.00 | 1.00 | 0.00 |
| 0.00   | 53.00  | 1.00   | 120.00 | 90.00  | 0.00 | 0.00 | 0.00 |
| #NULL! | 61.00  | 1.00   | 9.00   | 126.00 | 0.00 | 0.00 | 0.00 |
| 1.00   | 72.00  | 1.00   | 108.00 | 264.00 | 0.00 | 1.00 | 0.00 |
| 2.00   | 76.00  | 1.00   | 80.00  | 91.00  | 0.00 | 0.00 | 0.00 |
| #NULL! | 61.00  | 1.00   | 162.00 | 110.00 | 1.00 | 0.00 | 1.00 |
| #NULL! | 60.00  | 1.00   | 378.00 | 306.00 | 1.00 | 1.00 | 1.00 |
| 1.00   | 65.00  | 1.00   | 54.00  | 30.00  | 0.00 | 0.00 | 0.00 |

|        |        |        |        |        |      |      |      |
|--------|--------|--------|--------|--------|------|------|------|
| 0.00   | 62.00  | 1.00   | 100.00 | 9.00   | 0.00 | 0.00 | 0.00 |
| 0.00   | 59.00  | 1.00   | 80.00  | 18.00  | 0.00 | 0.00 | 0.00 |
| 1.00   | 72.00  | 1.00   | 20.00  | 12.00  | 0.00 | 0.00 | 0.00 |
| 0.00   | 67.00  | 1.00   | 48.00  | 8.00   | 0.00 | 0.00 | 0.00 |
| #NULL! | 50.00  | 1.00   | 150.00 | 135.00 | 1.00 | 1.00 | 1.00 |
| #NULL! | 53.00  | 1.00   | 28.00  | 12.00  | 0.00 | 0.00 | 0.00 |
| 4.00   | 59.00  | 1.00   | 0.00   | 0.00   | 0.00 | 0.00 | 0.00 |
| 2.00   | 66.00  | 1.00   | 102.00 | 132.00 | 0.00 | 1.00 | 0.00 |
| 1.00   | 48.00  | 1.00   | 160.00 | 72.00  | 1.00 | 0.00 | 1.00 |
| 1.00   | 70.00  | 1.00   | #NULL! | 196.00 | 0.00 | 1.00 | 0.00 |
| 3.00   | 72.00  | 1.00   | #NULL! | 156.00 | 0.00 | 1.00 | 0.00 |
| 3.00   | 72.00  | 1.00   | #NULL! | 0.00   | 0.00 | 0.00 | 0.00 |
| 1.00   | 56.00  | 1.00   | #NULL! | 12.00  | 0.00 | 0.00 | 0.00 |
| 0.00   | 69.00  | 1.00   | #NULL! | 49.00  | 0.00 | 0.00 | 0.00 |
| 1.00   | 61.00  | 1.00   | #NULL! | #NULL! | 0.00 | 0.00 | 0.00 |
| 1.00   | 52.00  | 1.00   | #NULL! | #NULL! | 0.00 | 0.00 | 0.00 |
| #NULL! | #NULL! | #NULL! | #NULL! | 588.00 | 0.00 | 1.00 | 0.00 |
| #NULL! | #NULL! | #NULL! | #NULL! | 8.00   | 0.00 | 0.00 | 0.00 |





























|        |        |      |      |      |
|--------|--------|------|------|------|
| #NULL! | #NULL! | 0.00 | 0.00 | 0.00 |
| #NULL! | #NULL! | 0.00 | 0.00 | 0.00 |
| #NULL! | #NULL! | 0.00 | 0.00 | 0.00 |
| 1.00   | 1.00   | 0.00 | 1.00 | 0.00 |
| #NULL! | #NULL! | 0.00 | 0.00 | 0.00 |
| #NULL! | #NULL! | 0.00 | 0.00 | 0.00 |
| #NULL! | #NULL! | 0.00 | 0.00 | 0.00 |
| #NULL! | #NULL! | 0.00 | 0.00 | 0.00 |
| 1.00   | #NULL! | 1.00 | 0.00 | 1.00 |
| 1.00   | 1.00   | 1.00 | 0.00 | 1.00 |
| #NULL! | #NULL! | 0.00 | 0.00 | 0.00 |
| #NULL! | #NULL! | 0.00 | 0.00 | 0.00 |
| #NULL! | #NULL! | 0.00 | 0.00 | 0.00 |
| #NULL! | #NULL! | 0.00 | 0.00 | 0.00 |
| 1.00   | 1.00   | 1.00 | 1.00 | 1.00 |
| #NULL! | #NULL! | 0.00 | 0.00 | 0.00 |
| #NULL! | #NULL! | 0.00 | 0.00 | 0.00 |
| #NULL! | #NULL! | 0.00 | 0.00 | 0.00 |
| #NULL! | #NULL! | 0.00 | 0.00 | 0.00 |
| #NULL! | #NULL! | 0.00 | 0.00 | 0.00 |
| #NULL! | #NULL! | 0.00 | 0.00 | 0.00 |
| 1.00   | #NULL! | 1.00 | 0.00 | 1.00 |
| 1.00   | #NULL! | 1.00 | 0.00 | 1.00 |
| 1.00   | 1.00   | 1.00 | 1.00 | 1.00 |
| #NULL! | #NULL! | 0.00 | 0.00 | 0.00 |
| #NULL! | 1.00   | 0.00 | 0.00 | 0.00 |
| #NULL! | #NULL! | 0.00 | 0.00 | 0.00 |
| 1.00   | 1.00   | 1.00 | 1.00 | 1.00 |
| #NULL! | #NULL! | 0.00 | 0.00 | 0.00 |
| #NULL! | #NULL! | 0.00 | 0.00 | 0.00 |
| #NULL! | #NULL! | 0.00 | 0.00 | 0.00 |
| #NULL! | #NULL! | 0.00 | 0.00 | 0.00 |
| #NULL! | #NULL! | 0.00 | 0.00 | 0.00 |
| #NULL! | #NULL! | 0.00 | 0.00 | 0.00 |
| 1.00   | 1.00   | 1.00 | 1.00 | 1.00 |
| #NULL! | #NULL! | 0.00 | 0.00 | 0.00 |
| #NULL! | #NULL! | 0.00 | 0.00 | 0.00 |
| #NULL! | #NULL! | 0.00 | 0.00 | 0.00 |
| 1.00   | 1.00   | 1.00 | 1.00 | 1.00 |
| 1.00   | 1.00   | 1.00 | 1.00 | 1.00 |
| 1.00   | #NULL! | 1.00 | 0.00 | 1.00 |
| #NULL! | #NULL! | 0.00 | 0.00 | 0.00 |
| #NULL! | #NULL! | 0.00 | 0.00 | 0.00 |
| #NULL! | #NULL! | 0.00 | 0.00 | 0.00 |
| #NULL! | #NULL! | 0.00 | 0.00 | 0.00 |
| #NULL! | #NULL! | 0.00 | 0.00 | 0.00 |
| #NULL! | #NULL! | 0.00 | 0.00 | 0.00 |
| #NULL! | #NULL! | 0.00 | 0.00 | 0.00 |
| 1.00   | #NULL! | 1.00 | 0.00 | 1.00 |



|        |        |      |      |      |
|--------|--------|------|------|------|
| #NULL! | #NULL! | 0.00 | 0.00 | 0.00 |
| #NULL! | #NULL! | 0.00 | 0.00 | 0.00 |
| 1.00   | #NULL! | 1.00 | 0.00 | 1.00 |
| 1.00   | 1.00   | 1.00 | 1.00 | 1.00 |
| #NULL! | #NULL! | 0.00 | 0.00 | 0.00 |
| #NULL! | #NULL! | 0.00 | 0.00 | 0.00 |
| #NULL! | #NULL! | 0.00 | 0.00 | 0.00 |
| #NULL! | #NULL! | 0.00 | 0.00 | 0.00 |
| #NULL! | #NULL! | 0.00 | 0.00 | 0.00 |
| 1.00   | 1.00   | 1.00 | 1.00 | 1.00 |
| #NULL! | #NULL! | 0.00 | 0.00 | 0.00 |
| #NULL! | 1.00   | 0.00 | 1.00 | 0.00 |
| #NULL! | #NULL! | 0.00 | 0.00 | 0.00 |
| #NULL! | #NULL! | 0.00 | 0.00 | 0.00 |
| #NULL! | #NULL! | 0.00 | 0.00 | 0.00 |
| 1.00   | 1.00   | 1.00 | 1.00 | 1.00 |
| #NULL! | #NULL! | 0.00 | 0.00 | 0.00 |
| #NULL! | #NULL! | 0.00 | 0.00 | 0.00 |
| #NULL! | #NULL! | 0.00 | 0.00 | 0.00 |
| #NULL! | #NULL! | 0.00 | 0.00 | 0.00 |
| 1.00   | #NULL! | 0.00 | 0.00 | 0.00 |
| 1.00   | 1.00   | 1.00 | 1.00 | 1.00 |
| #NULL! | #NULL! | 0.00 | 0.00 | 0.00 |
| #NULL! | 1.00   | 0.00 | 1.00 | 0.00 |
| 1.00   | 1.00   | 1.00 | 1.00 | 1.00 |
| #NULL! | #NULL! | 0.00 | 0.00 | 0.00 |
| #NULL! | 1.00   | 0.00 | 1.00 | 0.00 |
| #NULL! | #NULL! | 0.00 | 0.00 | 0.00 |
| 1.00   | #NULL! | 1.00 | 0.00 | 1.00 |
| 1.00   | #NULL! | 1.00 | 0.00 | 1.00 |
| #NULL! | #NULL! | 0.00 | 0.00 | 0.00 |
| #NULL! | #NULL! | 0.00 | 0.00 | 0.00 |
| #NULL! | 1.00   | 0.00 | 1.00 | 0.00 |
| 1.00   | 1.00   | 1.00 | 1.00 | 1.00 |
| #NULL! | #NULL! | 0.00 | 0.00 | 0.00 |
| #NULL! | #NULL! | 0.00 | 0.00 | 0.00 |
| 1.00   | 1.00   | 1.00 | 1.00 | 1.00 |
| 1.00   | 1.00   | 1.00 | 1.00 | 1.00 |
| #NULL! | 1.00   | 0.00 | 1.00 | 0.00 |
| #NULL! | #NULL! | 0.00 | 0.00 | 0.00 |
| #NULL! | 1.00   | 0.00 | 1.00 | 0.00 |
| 1.00   | #NULL! | 1.00 | 0.00 | 1.00 |
| #NULL! | #NULL! | 0.00 | 0.00 | 0.00 |
| #NULL! | #NULL! | 0.00 | 0.00 | 0.00 |
| #NULL! | #NULL! | 0.00 | 0.00 | 0.00 |
| #NULL! | 1.00   | 0.00 | 0.00 | 0.00 |
| #NULL! | #NULL! | 0.00 | 0.00 | 0.00 |
| #NULL! | #NULL! | 0.00 | 0.00 | 0.00 |
| #NULL! | 1.00   | 0.00 | 1.00 | 0.00 |
| #NULL! | #NULL! | 0.00 | 0.00 | 0.00 |





|        |        |      |      |      |
|--------|--------|------|------|------|
| #NULL! | #NULL! | 0.00 | 0.00 | 0.00 |
| #NULL! | #NULL! | 0.00 | 0.00 | 0.00 |
| #NULL! | #NULL! | 0.00 | 0.00 | 0.00 |
| #NULL! | #NULL! | 0.00 | 0.00 | 0.00 |
| #NULL! | 1.00   | 0.00 | 1.00 | 0.00 |
| #NULL! | #NULL! | 0.00 | 0.00 | 0.00 |
| #NULL! | #NULL! | 0.00 | 0.00 | 0.00 |
| #NULL! | #NULL! | 0.00 | 0.00 | 0.00 |
| #NULL! | 1.00   | 0.00 | 1.00 | 0.00 |
| 1.00   | #NULL! | 1.00 | 0.00 | 1.00 |
| 1.00   | #NULL! | 1.00 | 0.00 | 1.00 |
| #NULL! | #NULL! | 0.00 | 0.00 | 0.00 |
| #NULL! | #NULL! | 0.00 | 0.00 | 0.00 |
| #NULL! | #NULL! | 0.00 | 0.00 | 0.00 |
| #NULL! | #NULL! | 0.00 | 0.00 | 0.00 |
| #NULL! | #NULL! | 0.00 | 0.00 | 0.00 |
| 1.00   | #NULL! | 1.00 | 0.00 | 1.00 |
| #NULL! | #NULL! | 0.00 | 0.00 | 0.00 |
